# Supplementary material
Source: Frontiers journal article supplement (https://www.frontiersin.org/articles/453542)
Supplement: Table_1.xlsx [file Table_1.xlsx]

## Sheet: Supplementary table 1
Supplementary table 1
MIC and MBC results for all relevant strains involved in the study. Six phenotypic groups are built from strains that contain values for each column.
Isolate	Species	Vancomycin MIC (mg/L)	Vancomycin MBC (mg/L)	Fusidic Acid MIC (mg/L)	Fusidic Acid MBC (mg/L)	Clindamycin MIC (mg/L)	Clindamycin MBC (mg/L)	Rifampin MIC (mg/L)	Ciprofloxacin MIC (mg/L)
R26	Elizabethkingia anophelis	8	16	16	32	0.5	4	0.125	0.5
422	E. anophelis	64	64	16	64	1	4	0.25	0.5
3375	E. anophelis	4	8	128	256	1	2	0.25	0.25
E6809	E. anophelis	4	8	32	256	1	8	0.125	0.125
F3543	E. anophelis	4	8	32	256	1	4	0.5	0.5
F3201	E. anophelis	4	8	16	32	1	4	1	1
G4071	Elizabethkingia miricola	4	8	16	256	0.0625	0.25	1	1
G4074	E. miricola	4	8	16	32	0.0625	0.0625	0.0625	1
G4121	E. miricola	4	8	4	8	0.125	0.25	0.0625	0.5
KC1913	Elizabethkingia meningosceptica	64	64	8	32	0.25	1	0.125	1
G4076	E. meningosceptica	64	64	8	32	0.125	2	0.5	0.5
G4120	E. meningosceptica	32	32	8	32	0.0625	0.125	0.25	1
G4075	Elizabethkingia bruuniana	8	8	4	8	0.0625	0.25	0.25	0.5
G0146	E. bruuniana	4	8	4	4	0.0625	0.0625	0.125	0.125
G0153	E. bruuniana	2	4	16	32	0.0625	0.125	0.125	0.5
G4122	Elizabethkingia ursingii	2	4	16	32	0.0625	0.0625	0.5	0.5
G4070	Elizabethkingia occulta	8	16	4	8	0.25	1	0.125	0.125
G4123	E. ursingii	2	4	4	8	0.125	0.25	0.25	0.25
OSUVM-1	E. anophelis	8	16	16	32	1	4	1	0.5
OSUVM-2	E. anophelis	32	64	16	32	1	4	0.5	0.5
ATCC 33958	E. bruuniana	8	16	8	16	0.125	0.25	0.125	0.125
V040	Staphylococcus aureus	4	-	-	-	-	-	-	-
V808	S. aureus	4	-	-	-	-	-	-	-
V1127	S. aureus	4	-	-	-	-	-	32	-
V1142	S. aureus	4	-	-	-	-	-	-	-
805447/07	Enterococcus faecium	256	-	4	-	8	-	-	2
ET-024	Staphylococcus epidermidis	2	-	-	-	-	-	-	-
VBV9352	S. aureus	3	-	-	-	-	-	-	-
VB12268	S. aureus	3	-	-	-	-	-	-	-
VB26276	S. aureus	2	-	-	-	-	-	-	-
VB23686	S. aureus	3	-	-	-	-	-	-	-
VBV169	S. aureus	1.5	-	-	-	-	-	-	-
VB31683	S. aureus	3	-	-	-	-	-	-	-
SW120	Staphylococcus cohnii	-	-	4	-	-	-	-	-
GOI1153754-03-14	S. epidermidis	-	-	0.5	-	0.12	-	4	-
64/3	E. faecium	-	-	128	-	-	-	128	-
CNM 463/05	Corynebacterium argentoratense	-	-	-	-	256	-	0.032	0.125
CNM 601/08	C. argentoratense	-	-	-	-	256	-	0.023	0.25
CD8-15	Clostridium difficile	-	-	-	-	2	-	32	-
910340	Parabacteroides goldsteinii	-	-	-	-	256	-	-	-
HL411PA1	Propionibacterium acnes	-	-	-	-	256	-	-	-
DSM 15541	Actinotignum Schaalii	-	-	-	-	-	-	0.002	-
H37Ra	Mycobacterium Tuberculosis	-	-	-	-	-	-	0.064	-
KWT B	Cellulosimicrobium sp.	-	-	-	-	-	-	-	12
32S	S. aureus	-	-	-	-	-	-	-	256
42S	S. aureus	-	-	-	-	-	-	-	256
G2891	Neisseria gonorrhoeae	-	-	-	-	-	-	-	32

## Sheet: Supplementary table 2
Supplementary table 2
Annotation results from Prokka identifying the presence of AMR genes for the five antibiotics
Isolate	Species	Vancomycin AMR genes	Fusidic Acid AMR genes	Clindamycin AMR genes	Rifampin AMR genes	Ciprofloxacin AMR genes
R26	Elizabethkingia anophelis	vanW	-	-	-	-
422	E. anophelis	vanW	-	-	-	-
3375	E. anophelis	vanW	-	-	-	-
E6809	E. anophelis	vanW	-	-	-	-
F3543	E. anophelis	vanW	-	-	-	-
F3201	E. anophelis	vanW	-	-	-	-
G4071	Elizabethkingia miricola	vanW	-	-	-	-
G4074	E. miricola	vanW	-	-	-	-
G4121	E. miricola	vanW	-	-	-	-
KC1913	Elizabethkingia meningosceptica	vanW, vanB	-	-	-	-
G4076	E. meningosceptica	vanW	-	-	-	-
G4120	E. meningosceptica	vanW	-	-	-	-
G4075	Elizabethkingia bruuniana	vanW	-	-	-	-
G0146	E. bruuniana	vanW	-	-	-	-
G0153	E. bruuniana	vanW	-	-	-	-
G4122	Elizabethkingia ursingii	vanW	-	-	-	-
G4070	Elizabethkingia occulta	vanW	-	-	-	-
G4123	E. ursingii	vanW	-	-	-	-
OSUVM-1	E. anophelis	vanW	-	-	-	-
OSUBM-2	E. anophelis	vanW	-	-	-	-
ATCC 33958	E. bruuniana	vanW	-	-	-	-
V040	Staphylococcus aureus	-	-	-	-	-
V808	S. aureus	-	-	ermA1	-	-
V1127	S. aureus	-	-	ermA1	-	-
V1142	S. aureus	-	-	-	-	-
805447/07	Enterococcus faecium	vanX, vanA, vanH	-	erm	-	-
ET-024	Staphylococcus epidermidis	-	-	-	-	-
VBV9352	S. aureus	-	-	-	-	-
VB12268	S. aureus	-	-	-	-	-
VB26276	S. aureus	-	-	-	-	-
VB23686	S. aureus	-	-	-	-	-
VBV169	S. aureus	-	-	-	-	-
VB31683	S. aureus	-	-	ermC	-	-
SW120	Staphylococcus cohnii	-	-	-	-	-
GOI1153754-03-14	S. epidermidis	-	-	-	-	-
64/3	E. faecium	-	-	-	-	-
CNM 463/05	Corynebacterium argentoratense	-	-	-	-	-
CNM 601/08	C. argentoratense	-	-	-	-	-
CD8-15	Clostridium difficile	vanW, vanT, vanY, vanB	-	-	-	-
910340	Parabacteroides goldsteinii	-	-	ermD	-	-
HL411PA1	Propionibacterium acnes	vanH	-	-	-	-
DSM 15541	Actinotignum Schaalii	-	-	-	-	-
H37Ra	Mycobacterium Tuberculosis	-	-	ermD	-	-
KWT B	Cellulosimicrobium sp.	vanY, vanW	-	-	-	-
32S	S. aureus	-	-	ermA1	-	-
42S	S. aureus	-	-	ermC	-	-
G2891	Neisseria gonorrhoeae	-	-	-	-	-

## Sheet: Supplementary table 3
Supplementary table 3
Assigned multiclass resistance levels for each included strains. Categorized phenotypic values are additively encoded, with the lowest resistance starting from 1, and increasing additively to a maximum value for that group.
Isolate	Species	Vancomycin Level	Fusidic Acid Level	Clindamycin Level	Rifampin Level	Ciprofloxacin Level
R26	Elizabethkingia anophelis	2	2	1	1	1
422	E. anophelis	2	2	2	1	1
3375	E. anophelis	1	3	2	1	0
E6809	E. anophelis	1	3	2	1	0
F3543	E. anophelis	1	3	2	2	1
F3201	E. anophelis	1	2	2	2	2
G4071	Elizabethkingia miricola	1	2	0	2	2
G4074	E. miricola	1	2	0	0	2
G4121	E. miricola	1	0	1	0	1
KC1913	Elizabethkingia meningosceptica	2	1	1	1	2
G4076	E. meningosceptica	2	1	1	2	1
G4120	E. meningosceptica	2	1	0	1	2
G4075	Elizabethkingia bruuniana	2	0	0	1	1
G0146	E. bruuniana	1	0	0	1	0
G0153	E. bruuniana	0	2	0	1	1
G4122	Elizabethkingia ursingii	0	2	0	2	1
G4070	Elizabethkingia occulta	2	0	1	1	0
G4123	E. ursingii	0	0	1	1	0
OSUVM-1	E. anophelis	2	2	2	2	1
OSUVM-2	E. anophelis	2	2	2	2	1
ATCC 33958	E. bruuniana	2	1	1	1	0
V040	Staphylococcus aureus	1	-	-	-	-
V808	S. aureus	1	-	-	-	-
V1127	S. aureus	1	-	-	2	-
V1142	S. aureus	1	-	-	-	-
805447/07	Enterococcus faecium	2	0	3	-	2
ET-024	Staphylococcus epidermidis	0	-	-	-	-
VBV9352	S. aureus	0	-	-	-	-
VB12268	S. aureus	0	-	-	-	-
VB26276	S. aureus	0	-	-	-	-
VB23686	S. aureus	0	-	-	-	-
VBV169	S. aureus	0	-	-	-	-
VB31683	S. aureus	0	-	-	-	-
SW120	Staphylococcus cohnii	-	0	-	-	-
GOI1153754-03-14	S. epidermidis	-	0	1	2	-
64/3	E. faecium	-	3		2	-
CNM 463/05	Corynebacterium argentoratense	-	-	3	0	0
CNM 601/08	C. argentoratense	-	-	3	0	0
CD8-15	Clostridium difficile	-	-	3	2	-
910340	Parabacteroides goldsteinii	-	-	3	-	-
HL411PA1	Propionibacterium acnes	-	-	3	-	-
DSM 15541	Actinotignum Schaalii	-	-	-	0	-
H37Ra	Mycobacterium Tuberculosis	-	-	-	0	-
KWT B	Cellulosimicrobium sp.	-	-	-	-	2
32S	S. aureus	-	-	-	-	2
42S	S. aureus	-	-	-	-	2
G2891	Neisseria gonorrhoeae	-	-	-	-	2

## Sheet: Supplementary table 4
Supplementary Table 4.
References for MIC/MBC results and genome sequences of individual strains.
Isolate	Species	Source
R26	Elizabethkingia anophelis
422	E. anophelis	(Nicholson et al., 2016)
3375	E. anophelis	Direct Submission, MAHM00000000
E6809	E. anophelis	Direct Submission, MAHS00000000
F3543	E. anophelis	Direct Submission, MAHT00000000
F3201	E. anophelis	Direct Submission, MAHU00000000
G4071	Elizabethkingia miricola	(Nicholson et al., 2016)
G4074	E. miricola	Direct Submission, MAHY00000000
G4121	E. miricola	Direct Submission, MAIB00000000
KC1913	Elizabethkingia meningosceptica
G4076	E. meningosceptica	Direct Submission, MAHZ00000000
G4120	E. meningosceptica	Direct Submission, MAIA00000000
G4075	Elizabethkingia bruuniana	(Nicholson et al., 2016)
G0146	E. bruuniana	Direct Submission, MAHV00000000
G0153	E. bruuniana	Direct Submission, MAHW00000000
G4122	Elizabethkingia ursingii	(Nicholson et al., 2016)
G4070	Elizabethkingia occulta	(Nicholson et al., 2018)
G4123	E. ursingii	Direct Submission, MAIC00000000
OSUVM-1	E. anopheles	(Johnson et al., 2018)
OSUVM-2	E. anopheles	(Johnson et al., 2018)
AC33958	E. bruuniana
V040	Staphylococcus aureus	(Kim et al., 2016)
V808	S. aureus	(Kim et al., 2016)
V1127	S. aureus	(Kim et al., 2016)
V1142	S. aureus	(Kim et al., 2016)
805447/07	Enterococcus faecium	(Blaschitz et al., 2016)
ET-024	Staphylococcus epidermidis	(Vandecandelaere et al., 2014)
VBV9352	S. aureus	(Bakthavatchalam et al., 2017)
VB12268	S. aureus	(Bakthavatchalam et al., 2017)
VB26276	S. aureus	(Bakthavatchalam et al., 2017)
VB23686	S. aureus	(Bakthavatchalam et al., 2017)
VBV169	S. aureus	(Bakthavatchalam et al., 2017)
VB31683	S. aureus	(Bakthavatchalam et al., 2017)
SW120	Staphylococcus cohnii	(Bean et al., 2017)
GOI1153754-03-14	S. epidermidis	(Lovati et al., 2016;Bottagisio et al., 2017)
64/3	E. faecium	(Bender et al., 2015)
CNM 463/05	Corynebacterium argentoratense	(Fernandez-Natal et al., 2015;Fernandez-Natal et al., 2016)
CNM 601/08	C. argentoratense	(Fernandez-Natal et al., 2015;Fernandez-Natal et al., 2016)
CD8-15	Clostridium difficile	(Riccobono et al., 2016)
910340	Parabacteroides goldsteinii	(Krogh et al., 2015)
HL411PA1	Propionibacterium acnes	(Liu et al., 2014)
DSM 15541	Actinotignum Schaalii	(Yassin et al., 2017)
H37Ra	Mycobacterium Tuberculosis	(Heinrichs et al., 2018)
KWT B	Cellulosimicrobium sp.	(Kenzaka et al., 2017)
32S	S. aureus	(Khan et al., 2016)
42S	S. aureus	(Khan et al., 2016)
G2891	Neisseria gonorrhoeae	(Anselmo et al., 2015)
Anselmo, A., Ciammaruconi, A., Carannante, A., Neri, A., Fazio, C., Fortunato, A., Palozzi, A.M., Vacca, P., Fillo, S., Lista, F., and Stefanelli, P. (2015). Draft Genome Sequence of Neisseria gonorrhoeae Sequence Type 1407, a Multidrug-Resistant Clinical Isolate. Genome Announc 3.
Bakthavatchalam, Y.D., Veeraraghavan, B., Devanga Ragupathi, N.K., Babu, P., Munuswamy, E., and David, T. (2017). Draft genome sequence of reduced teicoplanin-susceptible and vancomycin-heteroresistant methicillin-resistant Staphylococcus aureus from sepsis cases. J Glob Antimicrob Resist 8, 169-171.
Bean, D.C., Wigmore, S.M., and Wareham, D.W. (2017). Draft Genome Sequence of Staphylococcus cohnii subsp. urealyticus Isolated from a Healthy Dog. Genome Announc 5.
Bender, J.K., Fiedler, S., Klare, I., and Werner, G. (2015). Complete Genome Sequence of the Gut Commensal and Laboratory Strain Enterococcus faecium 64/3. Genome Announc 3.
Blaschitz, M., Lepuschitz, S., Wagner, L., Allerberger, F., Indra, A., Ruppitsch, W., and Huhulescu, S. (2016). Draft Genome Sequence of a Vancomycin-Resistant and Vancomycin-Dependent Enterococcus faecium Isolate. Genome Announc 4.
Bottagisio, M., Soggiu, A., Lovati, A.B., Toscano, M., Piras, C., Romano, C.L., Bonizzi, L., Roncada, P., and Drago, L. (2017). Draft Genome Sequence of Staphylococcus epidermidis Clinical Strain GOI1153754-03-14 Isolated from an Infected Knee Prosthesis. Genome Announc 5.
Fernandez-Natal, I., Saez-Nieto, J.A., Rodriguez-Lazaro, D., Valdezate-Ramos, S., Parras-Padilla, T., Medina, M.J., Rodriguez-Pollan, R.H., Blom, J., Tauch, A., and Soriano, F. (2016). Phenotypic, molecular characterization, antimicrobial susceptibility and draft genome sequence of Corynebacterium argentoratense strains isolated from clinical samples. New Microbes New Infect 10, 116-121.
Fernandez-Natal, M.I., Soriano, F., Acedo, A., Hernandez, M., Tauch, A., and Rodriguez-Lazaro, D. (2015). Draft Genome Sequences of the Two Unrelated Macrolide-Resistant Corynebacterium argentoratense Strains CNM 463/05 and CNM 601/08, Isolated from Patients in the University Hospital of Leon, Spain. Genome Announc 3.
Heinrichs, M.T., May, R.J., Heider, F., Reimers, T., Sy, S.K.B., Peloquin, C.A., and Derendorf, H. (2018). Mycobacterium tuberculosis Strains H37ra and H37rv have Equivalent Minimum Inhibitory Concentrations to Most Antituberculosis Drugs. International Journal of Mycobacteriology 7, 156-161.
Johnson, W.L., Ramachandran, A., Torres, N.J., Nicholson, A.C., Whitney, A.M., Bell, M., Villarma, A., Humrighouse, B.W., Sheth, M., Dowd, S.E., Mcquiston, J.R., and Gustafson, J.E. (2018). The draft genomes of Elizabethkingia anophelis of equine origin are genetically similar to three isolates from human clinical specimens. PLoS One 13, e0200731.
Kenzaka, T., Ishimoto, Y., and Tani, K. (2017). Draft Genome Sequence of Multidrug-Resistant Cellulosimicrobium sp. Strain KWT-B, Isolated from Feces of Hirundo rustica. Genome Announc 5.
Khan, S., Sung, K., Iram, S., Nawaz, M., Xu, J., and Marasa, B. (2016). Draft Genome Sequences of Two Methicillin-Resistant Clinical Staphylococcus aureus Isolates. Genome Announc 4.
Kim, J.W., Yoo, J.I., Kang, G.S., Lee, Y.S., Yu, J.Y., Park, C., and Kim, I.H. (2016). Draft Genome Sequences of Vancomycin-Intermediate Staphylococcus aureus Strains in South Korea. Genome Announc 4.
Krogh, T.J., Agergaard, C.N., Moller-Jensen, J., and Justesen, U.S. (2015). Draft Genome Sequence of Parabacteroides goldsteinii with Putative Novel Metallo-beta-Lactamases Isolated from a Blood Culture from a Human Patient. Genome Announc 3.
Liu, J., Cheng, A., Bangayan, N.J., Barnard, E., Curd, E., Craft, N., and Li, H. (2014). Draft Genome Sequences of Propionibacterium acnes Type Strain ATCC6919 and Antibiotic-Resistant Strain HL411PA1. Genome Announc 2.
Lovati, A.B., Romano, C.L., Bottagisio, M., Monti, L., De Vecchi, E., Previdi, S., Accetta, R., and Drago, L. (2016). Modeling Staphylococcus epidermidis-Induced Non-Unions: Subclinical and Clinical Evidence in Rats. PLoS One 11, e0147447.
Nicholson, A.C., Gulvik, C.A., Whitney, A.M., Humrighouse, B.W., Graziano, J., Emery, B., Bell, M., Loparev, V., Juieng, P., Gartin, J., Bizet, C., Clermont, D., Criscuolo, A., Brisse, S., and Mcquiston, J.R. (2018). Revisiting the taxonomy of the genus Elizabethkingia using whole-genome sequencing, optical mapping, and MALDI-TOF, along with proposal of three novel Elizabethkingia species: Elizab…
Nicholson, A.C., Humrighouse, B.W., Graziano, J.C., Emery, B., and Mcquiston, J.R. (2016). Draft Genome Sequences of Strains Representing Each of the Elizabethkingia Genomospecies Previously Determined by DNA-DNA Hybridization. Genome Announc 4.
Riccobono, E., Di Pilato, V., Della Malva, N., Meini, S., Ciraolo, F., Torricelli, F., and Rossolini, G.M. (2016). Draft Genome Sequence of Clostridium difficile Belonging to Ribotype 018 and Sequence Type 17. Genome Announc 4.
Vandecandelaere, I., Van Nieuwerburgh, F., Deforce, D., Nelis, H.J., and Coenye, T. (2014). Draft Genome Sequence of Methicillin-Resistant Staphylococcus epidermidis Strain ET-024, Isolated from an Endotracheal Tube Biofilm of a Mechanically Ventilated Patient. Genome Announc 2.
Yassin, A.F., Langenberg, S., Huntemann, M., Clum, A., Pillay, M., Palaniappan, K., Varghese, N., Mikhailova, N., Mukherjee, S., Reddy, T.B.K., Daum, C., Shapiro, N., Ivanova, N., Woyke, T., and Kyrpides, N.C. (2017). Draft genome sequence of Actinotignum schaalii DSM 15541T: Genetic insights into the lifestyle, cell fitness and virulence. PLoS One 12, e0188914.

## Sheet: Supplementary table 5 
Supplementary table 5
Elizabethkingia bruunianaATCC 33958 Prokka Annotation
seqid	source	type	start	end	score	strand	phase	attributes
33958	Prodigal:2.6	CDS	714	995	.	+	0	ID=GNDLBLIP_00001;inference=ab initio prediction:Prodigal:2.6;locus_tag=GNDLBLIP_00001;product=hypothetical protein
33958	Prodigal:2.6	CDS	1390	1512	.	+	0	ID=GNDLBLIP_00002;inference=ab initio prediction:Prodigal:2.6;locus_tag=GNDLBLIP_00002;product=hypothetical protein
33958	Prodigal:2.6	CDS	1547	1741	.	+	0	ID=GNDLBLIP_00003;inference=ab initio prediction:Prodigal:2.6;locus_tag=GNDLBLIP_00003;product=hypothetical protein
33958	Prodigal:2.6	CDS	1741	1914	.	+	0	ID=GNDLBLIP_00004;inference=ab initio prediction:Prodigal:2.6;locus_tag=GNDLBLIP_00004;product=hypothetical protein
33958	Prodigal:2.6	CDS	2169	2453	.	+	0	ID=GNDLBLIP_00005;inference=ab initio prediction:Prodigal:2.6;locus_tag=GNDLBLIP_00005;product=hypothetical protein
33958	Prodigal:2.6	CDS	2589	2687	.	+	0	ID=GNDLBLIP_00006;inference=ab initio prediction:Prodigal:2.6;locus_tag=GNDLBLIP_00006;product=hypothetical protein
33958	Prodigal:2.6	CDS	2995	3234	.	-	0	ID=GNDLBLIP_00007;eC_number=3.2.1.17;Name=lyc_1;dbxref=COG:COG3409;gene=lyc_1;inference=ab initio prediction:Prodigal:2.6,similar to AA sequence:UniProtKB:P34020;locus_tag=GNDLBLIP_00007;product=Autolytic lysozyme
33958	Prodigal:2.6	CDS	3294	3491	.	-	0	ID=GNDLBLIP_00008;inference=ab initio prediction:Prodigal:2.6;locus_tag=GNDLBLIP_00008;product=hypothetical protein
33958	Prodigal:2.6	CDS	4179	4571	.	+	0	ID=GNDLBLIP_00009;eC_number=1.6.99.3;Name=ndh;dbxref=COG:COG1252;gene=ndh;inference=ab initio prediction:Prodigal:2.6,similar to AA sequence:UniProtKB:P00393;locus_tag=GNDLBLIP_00009;product=NADH dehydrogenase
33958	Prodigal:2.6	CDS	4577	4942	.	+	0	ID=GNDLBLIP_00010;eC_number=1.6.99.-;inference=ab initio prediction:Prodigal:2.6,similar to AA sequence:UniProtKB:Q7A6J4;locus_tag=GNDLBLIP_00010;product=NADH dehydrogenase-like protein
33958	Prodigal:2.6	CDS	5187	5537	.	+	0	ID=GNDLBLIP_00011;eC_number=2.1.1.228;Name=trmD_1;gene=trmD_1;inference=ab initio prediction:Prodigal:2.6,similar to AA sequence:UniProtKB:Q6GHJ5;locus_tag=GNDLBLIP_00011;product=tRNA (guanine-N(1)-)-methyltransferase
33958	Prodigal:2.6	CDS	6832	7074	.	+	0	ID=GNDLBLIP_00012;inference=ab initio prediction:Prodigal:2.6;locus_tag=GNDLBLIP_00012;product=hypothetical protein
33958	Prodigal:2.6	CDS	7058	7300	.	+	0	ID=GNDLBLIP_00013;Name=asnC_1;dbxref=COG:COG1522;gene=asnC_1;inference=ab initio prediction:Prodigal:2.6,similar to AA sequence:UniProtKB:P0ACI6;locus_tag=GNDLBLIP_00013;product=Regulatory protein AsnC
33958	Prodigal:2.6	CDS	7308	7505	.	+	0	ID=GNDLBLIP_00014;eC_number=4.1.2.4;Name=deoC_1;gene=deoC_1;inference=ab initio prediction:Prodigal:2.6,protein motif:HAMAP:MF_00114;locus_tag=GNDLBLIP_00014;product=Deoxyribose-phosphate aldolase
33958	Prodigal:2.6	CDS	7649	7924	.	+	0	ID=GNDLBLIP_00015;eC_number=4.1.2.4;Name=deoC_2;gene=deoC_2;inference=ab initio prediction:Prodigal:2.6,protein motif:HAMAP:MF_00114;locus_tag=GNDLBLIP_00015;product=Deoxyribose-phosphate aldolase
33958	Prodigal:2.6	CDS	8090	8218	.	-	0	ID=GNDLBLIP_00016;inference=ab initio prediction:Prodigal:2.6;locus_tag=GNDLBLIP_00016;product=hypothetical protein
33958	Prodigal:2.6	CDS	8552	8656	.	+	0	ID=GNDLBLIP_00017;inference=ab initio prediction:Prodigal:2.6;locus_tag=GNDLBLIP_00017;product=hypothetical protein
33958	Prodigal:2.6	CDS	8656	8991	.	+	0	ID=GNDLBLIP_00018;eC_number=4.2.1.24;Name=hemB_1;dbxref=COG:COG0113;gene=hemB_1;inference=ab initio prediction:Prodigal:2.6,similar to AA sequence:UniProtKB:Q59334;locus_tag=GNDLBLIP_00018;product=Delta-aminolevulinic acid dehydratase
33958	Prodigal:2.6	CDS	8979	9188	.	+	0	ID=GNDLBLIP_00019;eC_number=4.2.1.24;Name=hemB_2;dbxref=COG:COG0113;gene=hemB_2;inference=ab initio prediction:Prodigal:2.6,similar to AA sequence:UniProtKB:Q59334;locus_tag=GNDLBLIP_00019;product=Delta-aminolevulinic acid dehydratase
33958	Prodigal:2.6	CDS	9170	9538	.	+	0	ID=GNDLBLIP_00020;eC_number=4.2.1.24;Name=hemB_3;dbxref=COG:COG0113;gene=hemB_3;inference=ab initio prediction:Prodigal:2.6,similar to AA sequence:UniProtKB:P42504;locus_tag=GNDLBLIP_00020;product=Delta-aminolevulinic acid dehydratase
33958	Prodigal:2.6	CDS	10253	10453	.	-	0	ID=GNDLBLIP_00021;eC_number=1.3.1.98;Name=murB_1;dbxref=COG:COG0812;gene=murB_1;inference=ab initio prediction:Prodigal:2.6,similar to AA sequence:UniProtKB:Q9KV40;locus_tag=GNDLBLIP_00021;product=UDP-N-acetylenolpyruvoylglucosamine reductase
33958	Prodigal:2.6	CDS	11083	11304	.	-	0	ID=GNDLBLIP_00022;inference=ab initio prediction:Prodigal:2.6;locus_tag=GNDLBLIP_00022;product=hypothetical protein
33958	Prodigal:2.6	CDS	11367	11549	.	-	0	ID=GNDLBLIP_00023;inference=ab initio prediction:Prodigal:2.6;locus_tag=GNDLBLIP_00023;product=hypothetical protein
33958	Prodigal:2.6	CDS	12367	12813	.	+	0	ID=GNDLBLIP_00024;inference=ab initio prediction:Prodigal:2.6;locus_tag=GNDLBLIP_00024;product=hypothetical protein
33958	Prodigal:2.6	CDS	12833	13126	.	+	0	ID=GNDLBLIP_00025;Name=lemA_1;dbxref=COG:COG1704;gene=lemA_1;inference=ab initio prediction:Prodigal:2.6,similar to AA sequence:UniProtKB:A8AVK0;locus_tag=GNDLBLIP_00025;product=Protein LemA
33958	Prodigal:2.6	CDS	13123	13386	.	+	0	ID=GNDLBLIP_00026;Name=lemA_2;dbxref=COG:COG1704;gene=lemA_2;inference=ab initio prediction:Prodigal:2.6,similar to AA sequence:UniProtKB:A8AVK0;locus_tag=GNDLBLIP_00026;product=Protein LemA
33958	Prodigal:2.6	CDS	13389	14516	.	+	0	ID=GNDLBLIP_00027;inference=ab initio prediction:Prodigal:2.6;locus_tag=GNDLBLIP_00027;product=hypothetical protein
33958	Prodigal:2.6	CDS	14519	14998	.	+	0	ID=GNDLBLIP_00028;inference=ab initio prediction:Prodigal:2.6;locus_tag=GNDLBLIP_00028;product=hypothetical protein
33958	Prodigal:2.6	CDS	15016	15381	.	+	0	ID=GNDLBLIP_00029;inference=ab initio prediction:Prodigal:2.6;locus_tag=GNDLBLIP_00029;product=hypothetical protein
33958	Prodigal:2.6	CDS	15437	15679	.	-	0	ID=GNDLBLIP_00030;eC_number=2.5.1.7;Name=murA_1;dbxref=COG:COG0766;gene=murA_1;inference=ab initio prediction:Prodigal:2.6,similar to AA sequence:UniProtKB:Q9HVW7;locus_tag=GNDLBLIP_00030;product=UDP-N-acetylglucosamine 1-carboxyvinyltransferase
33958	Prodigal:2.6	CDS	15685	16743	.	-	0	ID=GNDLBLIP_00031;eC_number=2.5.1.7;Name=murA1_1;gene=murA1_1;inference=ab initio prediction:Prodigal:2.6,similar to AA sequence:UniProtKB:A0A0H2ZNL3;locus_tag=GNDLBLIP_00031;product=UDP-N-acetylglucosamine 1-carboxyvinyltransferase
33958	Prodigal:2.6	CDS	16743	16988	.	-	0	ID=GNDLBLIP_00032;inference=ab initio prediction:Prodigal:2.6;locus_tag=GNDLBLIP_00032;product=hypothetical protein
33958	Prodigal:2.6	CDS	17054	17401	.	-	0	ID=GNDLBLIP_00033;inference=ab initio prediction:Prodigal:2.6;locus_tag=GNDLBLIP_00033;product=hypothetical protein
33958	Prodigal:2.6	CDS	17477	17896	.	-	0	ID=GNDLBLIP_00034;inference=ab initio prediction:Prodigal:2.6;locus_tag=GNDLBLIP_00034;product=hypothetical protein
33958	Prodigal:2.6	CDS	17904	18383	.	-	0	ID=GNDLBLIP_00035;inference=ab initio prediction:Prodigal:2.6;locus_tag=GNDLBLIP_00035;product=hypothetical protein
33958	Prodigal:2.6	CDS	18611	19963	.	+	0	ID=GNDLBLIP_00036;Name=der_1;dbxref=COG:COG1160;gene=der_1;inference=ab initio prediction:Prodigal:2.6,similar to AA sequence:UniProtKB:P50743;locus_tag=GNDLBLIP_00036;product=GTPase Der
33958	Prodigal:2.6	CDS	19976	20620	.	+	0	ID=GNDLBLIP_00037;eC_number=2.7.8.7;Name=sfp;dbxref=COG:COG2091;gene=sfp;inference=ab initio prediction:Prodigal:2.6,similar to AA sequence:UniProtKB:P39135;locus_tag=GNDLBLIP_00037;product=4'-phosphopantetheinyl transferase Sfp
33958	Prodigal:2.6	CDS	20641	21285	.	-	0	ID=GNDLBLIP_00038;inference=ab initio prediction:Prodigal:2.6;locus_tag=GNDLBLIP_00038;product=hypothetical protein
33958	Prodigal:2.6	CDS	21499	21984	.	-	0	ID=GNDLBLIP_00039;inference=ab initio prediction:Prodigal:2.6;locus_tag=GNDLBLIP_00039;product=hypothetical protein
33958	Prodigal:2.6	CDS	22029	24617	.	-	0	ID=GNDLBLIP_00040;Name=dhbF;dbxref=COG:COG1020;gene=dhbF;inference=ab initio prediction:Prodigal:2.6,similar to AA sequence:UniProtKB:P45745;locus_tag=GNDLBLIP_00040;product=Dimodular nonribosomal peptide synthase
33958	Prodigal:2.6	CDS	24817	25950	.	-	0	ID=GNDLBLIP_00041;Name=lgrD;gene=lgrD;inference=ab initio prediction:Prodigal:2.6,similar to AA sequence:UniProtKB:Q70LM4;locus_tag=GNDLBLIP_00041;product=Linear gramicidin synthase subunit D
33958	Prodigal:2.6	CDS	26060	26710	.	+	0	ID=GNDLBLIP_00042;eC_number=2.4.2.9;Name=upp;gene=upp;inference=ab initio prediction:Prodigal:2.6,similar to AA sequence:UniProtKB:P67396;locus_tag=GNDLBLIP_00042;product=Uracil phosphoribosyltransferase
33958	Prodigal:2.6	CDS	26716	27369	.	-	0	ID=GNDLBLIP_00043;inference=ab initio prediction:Prodigal:2.6;locus_tag=GNDLBLIP_00043;product=hypothetical protein
33958	Prodigal:2.6	CDS	27391	28317	.	-	0	ID=GNDLBLIP_00044;inference=ab initio prediction:Prodigal:2.6;locus_tag=GNDLBLIP_00044;product=hypothetical protein
33958	Prodigal:2.6	CDS	28530	28895	.	-	0	ID=GNDLBLIP_00045;Name=sutR;dbxref=COG:COG1396;gene=sutR;inference=ab initio prediction:Prodigal:2.6,similar to AA sequence:UniProtKB:P77626;locus_tag=GNDLBLIP_00045;product=HTH-type transcriptional regulator SutR
33958	Prodigal:2.6	CDS	28975	29535	.	+	0	ID=GNDLBLIP_00046;eC_number=2.3.3.9;Name=aceB_1;dbxref=COG:COG2225;gene=aceB_1;inference=ab initio prediction:Prodigal:2.6,similar to AA sequence:UniProtKB:P08997;locus_tag=GNDLBLIP_00046;product=Malate synthase A
33958	Prodigal:2.6	CDS	29550	30539	.	+	0	ID=GNDLBLIP_00047;eC_number=2.3.3.9;Name=aceB_2;dbxref=COG:COG2225;gene=aceB_2;inference=ab initio prediction:Prodigal:2.6,similar to AA sequence:UniProtKB:P08997;locus_tag=GNDLBLIP_00047;product=Malate synthase A
33958	Prodigal:2.6	CDS	30578	31852	.	+	0	ID=GNDLBLIP_00048;eC_number=4.1.3.1;Name=aceA;dbxref=COG:COG2224;gene=aceA;inference=ab initio prediction:Prodigal:2.6,similar to AA sequence:UniProtKB:P0A9G6;locus_tag=GNDLBLIP_00048;product=Isocitrate lyase
33958	Prodigal:2.6	CDS	32007	32726	.	+	0	ID=GNDLBLIP_00049;Name=aqpZ2;gene=aqpZ2;inference=ab initio prediction:Prodigal:2.6,similar to AA sequence:UniProtKB:Q8UJW4;locus_tag=GNDLBLIP_00049;product=Aquaporin Z 2
33958	Prodigal:2.6	CDS	32817	33368	.	-	0	ID=GNDLBLIP_00050;eC_number=2.3.1.57;Name=speG;gene=speG;inference=ab initio prediction:Prodigal:2.6,similar to AA sequence:UniProtKB:Q9KL03;locus_tag=GNDLBLIP_00050;product=Spermidine N(1)-acetyltransferase
33958	Prodigal:2.6	CDS	33450	33674	.	-	0	ID=GNDLBLIP_00051;inference=ab initio prediction:Prodigal:2.6;locus_tag=GNDLBLIP_00051;product=hypothetical protein
33958	Prodigal:2.6	CDS	33629	34204	.	-	0	ID=GNDLBLIP_00052;inference=ab initio prediction:Prodigal:2.6;locus_tag=GNDLBLIP_00052;product=hypothetical protein
33958	Prodigal:2.6	CDS	34201	34452	.	-	0	ID=GNDLBLIP_00053;inference=ab initio prediction:Prodigal:2.6;locus_tag=GNDLBLIP_00053;product=hypothetical protein
33958	Prodigal:2.6	CDS	34500	34922	.	-	0	ID=GNDLBLIP_00054;inference=ab initio prediction:Prodigal:2.6;locus_tag=GNDLBLIP_00054;product=hypothetical protein
33958	Prodigal:2.6	CDS	34919	35419	.	-	0	ID=GNDLBLIP_00055;inference=ab initio prediction:Prodigal:2.6;locus_tag=GNDLBLIP_00055;product=hypothetical protein
33958	Prodigal:2.6	CDS	35479	36060	.	-	0	ID=GNDLBLIP_00056;inference=ab initio prediction:Prodigal:2.6;locus_tag=GNDLBLIP_00056;product=hypothetical protein
33958	Prodigal:2.6	CDS	36064	36693	.	-	0	ID=GNDLBLIP_00057;eC_number=3.6.1.54;Name=lpxH_1;dbxref=COG:COG2908;gene=lpxH_1;inference=ab initio prediction:Prodigal:2.6,similar to AA sequence:UniProtKB:P43341;locus_tag=GNDLBLIP_00057;product=UDP-2%2C3-diacylglucosamine hydrolase
33958	Prodigal:2.6	CDS	36836	37135	.	-	0	ID=GNDLBLIP_00058;inference=ab initio prediction:Prodigal:2.6;locus_tag=GNDLBLIP_00058;product=hypothetical protein
33958	Prodigal:2.6	CDS	37430	38845	.	-	0	ID=GNDLBLIP_00059;Name=btuB_1;gene=btuB_1;inference=ab initio prediction:Prodigal:2.6,protein motif:HAMAP:MF_01531;locus_tag=GNDLBLIP_00059;product=Vitamin B12 transporter BtuB
33958	Prodigal:2.6	CDS	38980	39663	.	-	0	ID=GNDLBLIP_00060;Name=hemR_1;dbxref=COG:COG1629;gene=hemR_1;inference=ab initio prediction:Prodigal:2.6,similar to AA sequence:UniProtKB:P31499;locus_tag=GNDLBLIP_00060;product=Hemin receptor
33958	Prodigal:2.6	CDS	39850	40467	.	-	0	ID=GNDLBLIP_00061;eC_number=1.2.1.12;Name=gapA_1;dbxref=COG:COG0057;gene=gapA_1;inference=ab initio prediction:Prodigal:2.6,similar to AA sequence:UniProtKB:P0A9B2;locus_tag=GNDLBLIP_00061;product=Glyceraldehyde-3-phosphate dehydrogenase A
33958	Prodigal:2.6	CDS	40500	40853	.	-	0	ID=GNDLBLIP_00062;eC_number=1.2.1.12;Name=gapA_2;dbxref=COG:COG0057;gene=gapA_2;inference=ab initio prediction:Prodigal:2.6,similar to AA sequence:UniProtKB:P0A9B2;locus_tag=GNDLBLIP_00062;product=Glyceraldehyde-3-phosphate dehydrogenase A
33958	Prodigal:2.6	CDS	40886	41416	.	-	0	ID=GNDLBLIP_00063;eC_number=2.7.1.11;Name=pfkA_1;dbxref=COG:COG0205;gene=pfkA_1;inference=ab initio prediction:Prodigal:2.6,similar to AA sequence:UniProtKB:P21777;locus_tag=GNDLBLIP_00063;product=ATP-dependent 6-phosphofructokinase 1
33958	Prodigal:2.6	CDS	41503	41871	.	-	0	ID=GNDLBLIP_00064;eC_number=2.7.1.11;Name=pfkA_2;dbxref=COG:COG0205;gene=pfkA_2;inference=ab initio prediction:Prodigal:2.6,similar to AA sequence:UniProtKB:P21777;locus_tag=GNDLBLIP_00064;product=ATP-dependent 6-phosphofructokinase 1
33958	Prodigal:2.6	CDS	42235	42756	.	+	0	ID=GNDLBLIP_00065;Name=susC_1;gene=susC_1;inference=ab initio prediction:Prodigal:2.6,similar to AA sequence:UniProtKB:Q8A1G1;locus_tag=GNDLBLIP_00065;product=TonB-dependent receptor SusC
33958	Prodigal:2.6	CDS	42834	45023	.	+	0	ID=GNDLBLIP_00066;Name=susC_2;gene=susC_2;inference=ab initio prediction:Prodigal:2.6,similar to AA sequence:UniProtKB:Q8A1G1;locus_tag=GNDLBLIP_00066;product=TonB-dependent receptor SusC
33958	Prodigal:2.6	CDS	45056	45199	.	+	0	ID=GNDLBLIP_00067;inference=ab initio prediction:Prodigal:2.6;locus_tag=GNDLBLIP_00067;product=hypothetical protein
33958	Prodigal:2.6	CDS	45259	46950	.	+	0	ID=GNDLBLIP_00068;inference=ab initio prediction:Prodigal:2.6,similar to AA sequence:UniProtKB:A7LXT5;locus_tag=GNDLBLIP_00068;product=SusD-like protein
33958	Prodigal:2.6	CDS	46997	48514	.	-	0	ID=GNDLBLIP_00069;eC_number=3.1.6.1;Name=atsA_1;dbxref=COG:COG3119;gene=atsA_1;inference=ab initio prediction:Prodigal:2.6,similar to AA sequence:UniProtKB:Q9X759;locus_tag=GNDLBLIP_00069;product=Arylsulfatase
33958	Prodigal:2.6	CDS	48535	49707	.	-	0	ID=GNDLBLIP_00070;eC_number=2.7.11.1;Name=pkn1_1;dbxref=COG:COG0515;gene=pkn1_1;inference=ab initio prediction:Prodigal:2.6,similar to AA sequence:UniProtKB:O84147;locus_tag=GNDLBLIP_00070;product=Serine/threonine-protein kinase pkn1
33958	Prodigal:2.6	CDS	49805	50785	.	+	0	ID=GNDLBLIP_00071;inference=ab initio prediction:Prodigal:2.6;locus_tag=GNDLBLIP_00071;product=hypothetical protein
33958	Prodigal:2.6	CDS	50835	51065	.	+	0	ID=GNDLBLIP_00072;inference=ab initio prediction:Prodigal:2.6;locus_tag=GNDLBLIP_00072;product=hypothetical protein
33958	Prodigal:2.6	CDS	51398	53782	.	+	0	ID=GNDLBLIP_00073;dbxref=COG:COG1629;inference=ab initio prediction:Prodigal:2.6,similar to AA sequence:UniProtKB:Q9JZN9;locus_tag=GNDLBLIP_00073;product=putative TonB-dependent receptor
33958	Prodigal:2.6	CDS	53872	54435	.	+	0	ID=GNDLBLIP_00074;inference=ab initio prediction:Prodigal:2.6;locus_tag=GNDLBLIP_00074;product=hypothetical protein
33958	Prodigal:2.6	CDS	54485	54649	.	+	0	ID=GNDLBLIP_00075;inference=ab initio prediction:Prodigal:2.6;locus_tag=GNDLBLIP_00075;product=hypothetical protein
33958	Prodigal:2.6	CDS	54781	55356	.	+	0	ID=GNDLBLIP_00076;inference=ab initio prediction:Prodigal:2.6;locus_tag=GNDLBLIP_00076;product=hypothetical protein
33958	Prodigal:2.6	CDS	55353	55670	.	+	0	ID=GNDLBLIP_00077;inference=ab initio prediction:Prodigal:2.6;locus_tag=GNDLBLIP_00077;product=hypothetical protein
33958	Prodigal:2.6	CDS	55866	57086	.	+	0	ID=GNDLBLIP_00078;eC_number=2.8.4.4;Name=rimO;dbxref=COG:COG0621;gene=rimO;inference=ab initio prediction:Prodigal:2.6,similar to AA sequence:UniProtKB:Q9X2H6;locus_tag=GNDLBLIP_00078;product=Ribosomal protein S12 methylthiotransferase RimO
33958	Prodigal:2.6	CDS	57258	57662	.	+	0	ID=GNDLBLIP_00079;eC_number=4.2.2.-;Name=rlpA;dbxref=COG:COG0797;gene=rlpA;inference=ab initio prediction:Prodigal:2.6,similar to AA sequence:UniProtKB:Q57092;locus_tag=GNDLBLIP_00079;product=Endolytic peptidoglycan transglycosylase RlpA
33958	Prodigal:2.6	CDS	57755	59005	.	+	0	ID=GNDLBLIP_00080;Name=dctA_1;dbxref=COG:COG1301;gene=dctA_1;inference=ab initio prediction:Prodigal:2.6,similar to AA sequence:UniProtKB:P96603;locus_tag=GNDLBLIP_00080;product=C4-dicarboxylate transport protein
33958	Prodigal:2.6	CDS	59022	60347	.	+	0	ID=GNDLBLIP_00081;eC_number=3.1.3.1;Name=pafA_1;gene=pafA_1;inference=ab initio prediction:Prodigal:2.6,similar to AA sequence:UniProtKB:Q9KJX5;locus_tag=GNDLBLIP_00081;product=Alkaline phosphatase PafA
33958	Prodigal:2.6	CDS	60482	60661	.	+	0	ID=GNDLBLIP_00082;eC_number=3.1.3.1;Name=pafA_2;gene=pafA_2;inference=ab initio prediction:Prodigal:2.6,similar to AA sequence:UniProtKB:Q9KJX5;locus_tag=GNDLBLIP_00082;product=Alkaline phosphatase PafA
33958	Prodigal:2.6	CDS	60746	61195	.	+	0	ID=GNDLBLIP_00083;inference=ab initio prediction:Prodigal:2.6;locus_tag=GNDLBLIP_00083;product=hypothetical protein
33958	Prodigal:2.6	CDS	61251	62027	.	+	0	ID=GNDLBLIP_00084;inference=ab initio prediction:Prodigal:2.6;locus_tag=GNDLBLIP_00084;product=hypothetical protein
33958	Prodigal:2.6	CDS	62021	63334	.	+	0	ID=GNDLBLIP_00085;inference=ab initio prediction:Prodigal:2.6;locus_tag=GNDLBLIP_00085;product=hypothetical protein
33958	Prodigal:2.6	CDS	63348	63827	.	+	0	ID=GNDLBLIP_00086;inference=ab initio prediction:Prodigal:2.6;locus_tag=GNDLBLIP_00086;product=hypothetical protein
33958	Prodigal:2.6	CDS	63806	64078	.	+	0	ID=GNDLBLIP_00087;inference=ab initio prediction:Prodigal:2.6;locus_tag=GNDLBLIP_00087;product=hypothetical protein
33958	Prodigal:2.6	CDS	64232	64675	.	-	0	ID=GNDLBLIP_00088;inference=ab initio prediction:Prodigal:2.6;locus_tag=GNDLBLIP_00088;product=hypothetical protein
33958	Prodigal:2.6	CDS	64687	64860	.	-	0	ID=GNDLBLIP_00089;inference=ab initio prediction:Prodigal:2.6;locus_tag=GNDLBLIP_00089;product=hypothetical protein
33958	Prodigal:2.6	CDS	65000	65221	.	+	0	ID=GNDLBLIP_00090;inference=ab initio prediction:Prodigal:2.6;locus_tag=GNDLBLIP_00090;product=hypothetical protein
33958	Prodigal:2.6	CDS	65223	66134	.	+	0	ID=GNDLBLIP_00091;eC_number=4.4.1.15;Name=dcyD;dbxref=COG:COG2515;gene=dcyD;inference=ab initio prediction:Prodigal:2.6,similar to AA sequence:UniProtKB:P76316;locus_tag=GNDLBLIP_00091;product=D-cysteine desulfhydrase
33958	Prodigal:2.6	CDS	66131	66994	.	+	0	ID=GNDLBLIP_00092;eC_number=3.2.1.-;Name=lytG;dbxref=COG:COG1705;gene=lytG;inference=ab initio prediction:Prodigal:2.6,similar to AA sequence:UniProtKB:O32083;locus_tag=GNDLBLIP_00092;product=Exo-glucosaminidase LytG
33958	Prodigal:2.6	CDS	67044	67190	.	+	0	ID=GNDLBLIP_00093;inference=ab initio prediction:Prodigal:2.6;locus_tag=GNDLBLIP_00093;product=hypothetical protein
33958	Prodigal:2.6	CDS	67171	68445	.	+	0	ID=GNDLBLIP_00094;eC_number=5.4.3.8;Name=hemL;dbxref=COG:COG0001;gene=hemL;inference=ab initio prediction:Prodigal:2.6,similar to AA sequence:UniProtKB:P48247;locus_tag=GNDLBLIP_00094;product=Glutamate-1-semialdehyde 2%2C1-aminomutase
33958	Prodigal:2.6	CDS	68501	69181	.	-	0	ID=GNDLBLIP_00095;eC_number=5.-.-.-;Name=ygeA;dbxref=COG:COG1794;gene=ygeA;inference=ab initio prediction:Prodigal:2.6,similar to AA sequence:UniProtKB:P03813;locus_tag=GNDLBLIP_00095;product=Putative racemase YgeA
33958	Prodigal:2.6	CDS	69271	69957	.	+	0	ID=GNDLBLIP_00096;eC_number=3.6.4.12;Name=recG_1;dbxref=COG:COG1200;gene=recG_1;inference=ab initio prediction:Prodigal:2.6,similar to AA sequence:UniProtKB:P24230;locus_tag=GNDLBLIP_00096;product=ATP-dependent DNA helicase RecG
33958	Prodigal:2.6	CDS	69966	70472	.	+	0	ID=GNDLBLIP_00097;eC_number=3.6.4.12;Name=recG_2;gene=recG_2;inference=ab initio prediction:Prodigal:2.6,similar to AA sequence:UniProtKB:P64325;locus_tag=GNDLBLIP_00097;product=ATP-dependent DNA helicase RecG
33958	Prodigal:2.6	CDS	70596	71360	.	+	0	ID=GNDLBLIP_00098;eC_number=3.6.4.12;Name=recG_3;dbxref=COG:COG1200;gene=recG_3;inference=ab initio prediction:Prodigal:2.6,similar to AA sequence:UniProtKB:P24230;locus_tag=GNDLBLIP_00098;product=ATP-dependent DNA helicase RecG
33958	Prodigal:2.6	CDS	71382	72584	.	-	0	ID=GNDLBLIP_00099;eC_number=1.6.5.2;inference=ab initio prediction:Prodigal:2.6,similar to AA sequence:UniProtKB:A1A9Q9;locus_tag=GNDLBLIP_00099;product=NAD(P)H dehydrogenase (quinone)
33958	Prodigal:2.6	CDS	72684	73178	.	-	0	ID=GNDLBLIP_00100;inference=ab initio prediction:Prodigal:2.6;locus_tag=GNDLBLIP_00100;product=hypothetical protein
33958	Prodigal:2.6	CDS	73301	74173	.	-	0	ID=GNDLBLIP_00101;eC_number=4.3.3.7;Name=dapA_1;dbxref=COG:COG0329;gene=dapA_1;inference=ab initio prediction:Prodigal:2.6,similar to AA sequence:UniProtKB:Q9JZR4;locus_tag=GNDLBLIP_00101;product=4-hydroxy-tetrahydrodipicolinate synthase
33958	Prodigal:2.6	CDS	74299	74694	.	+	0	ID=GNDLBLIP_00102;Name=recO;gene=recO;inference=ab initio prediction:Prodigal:2.6,protein motif:HAMAP:MF_00201;locus_tag=GNDLBLIP_00102;product=DNA repair protein RecO
33958	Prodigal:2.6	CDS	75020	75787	.	-	0	ID=GNDLBLIP_00103;inference=ab initio prediction:Prodigal:2.6;locus_tag=GNDLBLIP_00103;product=hypothetical protein
33958	Prodigal:2.6	CDS	75852	76211	.	+	0	ID=GNDLBLIP_00104;Name=hslR;dbxref=COG:COG1188;gene=hslR;inference=ab initio prediction:Prodigal:2.6,similar to AA sequence:UniProtKB:P0ACG8;locus_tag=GNDLBLIP_00104;product=Heat shock protein 15
33958	Prodigal:2.6	CDS	76195	76299	.	+	0	ID=GNDLBLIP_00105;inference=ab initio prediction:Prodigal:2.6;locus_tag=GNDLBLIP_00105;product=hypothetical protein
33958	Prodigal:2.6	CDS	76271	76792	.	-	0	ID=GNDLBLIP_00106;eC_number=2.7.1.71;Name=aroK;dbxref=COG:COG0703;gene=aroK;inference=ab initio prediction:Prodigal:2.6,similar to AA sequence:UniProtKB:Q8A2B2;locus_tag=GNDLBLIP_00106;product=Shikimate kinase
33958	Aragorn:1.2	tRNA	76898	76971	.	+	.	ID=GNDLBLIP_00107;inference=COORDINATES:profile:Aragorn:1.2;locus_tag=GNDLBLIP_00107;product=tRNA-Lys(ttt)
33958	Aragorn:1.2	tRNA	77007	77091	.	+	.	ID=GNDLBLIP_00108;inference=COORDINATES:profile:Aragorn:1.2;locus_tag=GNDLBLIP_00108;product=tRNA-Leu(gag)
33958	Aragorn:1.2	tRNA	77140	77213	.	+	.	ID=GNDLBLIP_00109;inference=COORDINATES:profile:Aragorn:1.2;locus_tag=GNDLBLIP_00109;product=tRNA-Lys(ttt)
33958	Prodigal:2.6	CDS	77345	77734	.	+	0	ID=GNDLBLIP_00110;inference=ab initio prediction:Prodigal:2.6;locus_tag=GNDLBLIP_00110;product=hypothetical protein
33958	Prodigal:2.6	CDS	77796	78605	.	-	0	ID=GNDLBLIP_00111;eC_number=3.1.11.2;Name=exoA;dbxref=COG:COG0708;gene=exoA;inference=ab initio prediction:Prodigal:2.6,similar to AA sequence:UniProtKB:P37454;locus_tag=GNDLBLIP_00111;product=Exodeoxyribonuclease
33958	Prodigal:2.6	CDS	78664	79653	.	-	0	ID=GNDLBLIP_00112;eC_number=1.3.1.-;Name=dus;dbxref=COG:COG0042;gene=dus;inference=ab initio prediction:Prodigal:2.6,similar to AA sequence:UniProtKB:P9WNS7;locus_tag=GNDLBLIP_00112;product=putative tRNA-dihydrouridine synthase
33958	Prodigal:2.6	CDS	79754	80575	.	+	0	ID=GNDLBLIP_00113;eC_number=2.1.1.45;Name=thyA;dbxref=COG:COG0207;gene=thyA;inference=ab initio prediction:Prodigal:2.6,similar to AA sequence:UniProtKB:P67042;locus_tag=GNDLBLIP_00113;product=Thymidylate synthase
33958	Prodigal:2.6	CDS	80678	83191	.	+	0	ID=GNDLBLIP_00114;eC_number=3.4.11.2;Name=pepN_1;gene=pepN_1;inference=ab initio prediction:Prodigal:2.6,similar to AA sequence:UniProtKB:Q11010;locus_tag=GNDLBLIP_00114;product=Aminopeptidase N
33958	Prodigal:2.6	CDS	83800	84186	.	-	0	ID=GNDLBLIP_00115;inference=ab initio prediction:Prodigal:2.6;locus_tag=GNDLBLIP_00115;product=hypothetical protein
33958	Prodigal:2.6	CDS	84188	84586	.	-	0	ID=GNDLBLIP_00116;inference=ab initio prediction:Prodigal:2.6;locus_tag=GNDLBLIP_00116;product=hypothetical protein
33958	Prodigal:2.6	CDS	85035	85304	.	+	0	ID=GNDLBLIP_00117;inference=ab initio prediction:Prodigal:2.6;locus_tag=GNDLBLIP_00117;product=hypothetical protein
33958	Prodigal:2.6	CDS	85367	86137	.	+	0	ID=GNDLBLIP_00118;Name=apbC;dbxref=COG:COG0489;gene=apbC;inference=ab initio prediction:Prodigal:2.6,similar to AA sequence:UniProtKB:Q8ZNN5;locus_tag=GNDLBLIP_00118;product=Iron-sulfur cluster carrier protein
33958	Prodigal:2.6	CDS	86146	86391	.	+	0	ID=GNDLBLIP_00119;Name=nfuA_1;gene=nfuA_1;inference=ab initio prediction:Prodigal:2.6,protein motif:HAMAP:MF_01637;locus_tag=GNDLBLIP_00119;product=Fe/S biogenesis protein NfuA
33958	Prodigal:2.6	CDS	86506	88740	.	+	0	ID=GNDLBLIP_00120;Name=fhuA_1;dbxref=COG:COG1629;gene=fhuA_1;inference=ab initio prediction:Prodigal:2.6,similar to AA sequence:UniProtKB:P06971;locus_tag=GNDLBLIP_00120;product=Ferrichrome outer membrane transporter/phage receptor
33958	Prodigal:2.6	CDS	88763	89674	.	-	0	ID=GNDLBLIP_00121;eC_number=3.6.1.11;Name=ppx2;gene=ppx2;inference=ab initio prediction:Prodigal:2.6,similar to AA sequence:UniProtKB:L7N5A6;locus_tag=GNDLBLIP_00121;product=Exopolyphosphatase 2
33958	Prodigal:2.6	CDS	89655	90020	.	-	0	ID=GNDLBLIP_00122;eC_number=2.7.4.1;Name=ppk_1;dbxref=COG:COG0855;gene=ppk_1;inference=ab initio prediction:Prodigal:2.6,similar to AA sequence:UniProtKB:P0A7B1;locus_tag=GNDLBLIP_00122;product=Polyphosphate kinase
33958	Prodigal:2.6	CDS	90161	91732	.	-	0	ID=GNDLBLIP_00123;eC_number=2.7.4.1;Name=ppk_2;dbxref=COG:COG0855;gene=ppk_2;inference=ab initio prediction:Prodigal:2.6,similar to AA sequence:UniProtKB:P0A7B1;locus_tag=GNDLBLIP_00123;product=Polyphosphate kinase
33958	Prodigal:2.6	CDS	91977	93821	.	+	0	ID=GNDLBLIP_00124;Name=dnaK;dbxref=COG:COG0443;gene=dnaK;inference=ab initio prediction:Prodigal:2.6,similar to AA sequence:UniProtKB:P50019;locus_tag=GNDLBLIP_00124;product=Chaperone protein DnaK
33958	Prodigal:2.6	CDS	94098	95225	.	-	0	ID=GNDLBLIP_00125;Name=flp_1;gene=flp_1;inference=ab initio prediction:Prodigal:2.6,similar to AA sequence:UniProtKB:Q7A3Q5;locus_tag=GNDLBLIP_00125;product=Protein flp
33958	Prodigal:2.6	CDS	95737	96303	.	+	0	ID=GNDLBLIP_00126;Name=yyaP_1;dbxref=COG:COG0262;gene=yyaP_1;inference=ab initio prediction:Prodigal:2.6,similar to AA sequence:UniProtKB:P37508;locus_tag=GNDLBLIP_00126;product=putative protein YyaP
33958	Prodigal:2.6	CDS	96305	96754	.	-	0	ID=GNDLBLIP_00127;inference=ab initio prediction:Prodigal:2.6;locus_tag=GNDLBLIP_00127;product=hypothetical protein
33958	Prodigal:2.6	CDS	96806	96937	.	-	0	ID=GNDLBLIP_00128;inference=ab initio prediction:Prodigal:2.6;locus_tag=GNDLBLIP_00128;product=hypothetical protein
33958	Prodigal:2.6	CDS	97149	97349	.	-	0	ID=GNDLBLIP_00129;inference=ab initio prediction:Prodigal:2.6;locus_tag=GNDLBLIP_00129;product=hypothetical protein
33958	Prodigal:2.6	CDS	97598	98635	.	+	0	ID=GNDLBLIP_00130;inference=ab initio prediction:Prodigal:2.6;locus_tag=GNDLBLIP_00130;product=hypothetical protein
33958	Prodigal:2.6	CDS	98845	99345	.	+	0	ID=GNDLBLIP_00131;eC_number=1.1.1.37;Name=mdh_1;gene=mdh_1;inference=ab initio prediction:Prodigal:2.6,similar to AA sequence:UniProtKB:Q25QU7;locus_tag=GNDLBLIP_00131;product=Malate dehydrogenase
33958	Prodigal:2.6	CDS	99321	99770	.	+	0	ID=GNDLBLIP_00132;eC_number=1.1.1.37;Name=mdh_2;gene=mdh_2;inference=ab initio prediction:Prodigal:2.6,similar to AA sequence:UniProtKB:Q25QU7;locus_tag=GNDLBLIP_00132;product=Malate dehydrogenase
33958	Prodigal:2.6	CDS	100035	100910	.	-	0	ID=GNDLBLIP_00133;inference=ab initio prediction:Prodigal:2.6;locus_tag=GNDLBLIP_00133;product=hypothetical protein
33958	Prodigal:2.6	CDS	101081	101545	.	-	0	ID=GNDLBLIP_00134;inference=ab initio prediction:Prodigal:2.6;locus_tag=GNDLBLIP_00134;product=hypothetical protein
33958	Prodigal:2.6	CDS	101532	101840	.	-	0	ID=GNDLBLIP_00135;inference=ab initio prediction:Prodigal:2.6;locus_tag=GNDLBLIP_00135;product=hypothetical protein
33958	Prodigal:2.6	CDS	102093	102233	.	+	0	ID=GNDLBLIP_00136;inference=ab initio prediction:Prodigal:2.6;locus_tag=GNDLBLIP_00136;product=hypothetical protein
33958	Prodigal:2.6	CDS	102901	103470	.	-	0	ID=GNDLBLIP_00137;Name=yceI_1;dbxref=COG:COG2353;gene=yceI_1;inference=ab initio prediction:Prodigal:2.6,similar to AA sequence:UniProtKB:P0A8X2;locus_tag=GNDLBLIP_00137;product=Protein YceI
33958	Prodigal:2.6	CDS	103569	104930	.	-	0	ID=GNDLBLIP_00138;eC_number=2.4.2.10;Name=pyrE;dbxref=COG:COG0461;gene=pyrE;inference=ab initio prediction:Prodigal:2.6,similar to AA sequence:UniProtKB:P9WHK9;locus_tag=GNDLBLIP_00138;product=Orotate phosphoribosyltransferase
33958	Prodigal:2.6	CDS	105136	106344	.	+	0	ID=GNDLBLIP_00139;Name=flp_2;gene=flp_2;inference=ab initio prediction:Prodigal:2.6,similar to AA sequence:UniProtKB:Q7A3Q5;locus_tag=GNDLBLIP_00139;product=Protein flp
33958	Prodigal:2.6	CDS	106943	107350	.	-	0	ID=GNDLBLIP_00140;eC_number=3.1.3.-;dbxref=COG:COG2062;inference=ab initio prediction:Prodigal:2.6,similar to AA sequence:UniProtKB:P9WGF9;locus_tag=GNDLBLIP_00140;product=putative protein
33958	Prodigal:2.6	CDS	107514	108125	.	-	0	ID=GNDLBLIP_00141;eC_number=2.3.1.-;Name=ydaF_1;dbxref=COG:COG1670;gene=ydaF_1;inference=ab initio prediction:Prodigal:2.6,similar to AA sequence:UniProtKB:P96579;locus_tag=GNDLBLIP_00141;product=Putative ribosomal N-acetyltransferase YdaF
33958	Prodigal:2.6	CDS	108344	108742	.	+	0	ID=GNDLBLIP_00142;eC_number=3.1.-.-;Name=yrrK;dbxref=COG:COG0816;gene=yrrK;inference=ab initio prediction:Prodigal:2.6,similar to AA sequence:UniProtKB:O34634;locus_tag=GNDLBLIP_00142;product=Putative pre-16S rRNA nuclease
33958	Prodigal:2.6	CDS	108750	109322	.	+	0	ID=GNDLBLIP_00143;eC_number=3.5.1.88;Name=def_1;dbxref=COG:COG0242;gene=def_1;inference=ab initio prediction:Prodigal:2.6,similar to AA sequence:UniProtKB:P43522;locus_tag=GNDLBLIP_00143;product=Peptide deformylase
33958	Prodigal:2.6	CDS	109355	109657	.	+	0	ID=GNDLBLIP_00144;inference=ab initio prediction:Prodigal:2.6;locus_tag=GNDLBLIP_00144;product=hypothetical protein
33958	Prodigal:2.6	CDS	109627	109905	.	+	0	ID=GNDLBLIP_00145;inference=ab initio prediction:Prodigal:2.6;locus_tag=GNDLBLIP_00145;product=hypothetical protein
33958	Prodigal:2.6	CDS	110006	110620	.	+	0	ID=GNDLBLIP_00146;eC_number=3.6.1.8;Name=mazG;dbxref=COG:COG1694;gene=mazG;inference=ab initio prediction:Prodigal:2.6,similar to AA sequence:UniProtKB:P0AEY3;locus_tag=GNDLBLIP_00146;product=Nucleoside triphosphate pyrophosphohydrolase
33958	Prodigal:2.6	CDS	110832	111497	.	+	0	ID=GNDLBLIP_00147;Name=pbpE_1;dbxref=COG:COG1680;gene=pbpE_1;inference=ab initio prediction:Prodigal:2.6,similar to AA sequence:UniProtKB:P32959;locus_tag=GNDLBLIP_00147;product=Penicillin-binding protein 4*
33958	Prodigal:2.6	CDS	111533	111886	.	+	0	ID=GNDLBLIP_00148;Name=pbpE_2;dbxref=COG:COG1680;gene=pbpE_2;inference=ab initio prediction:Prodigal:2.6,similar to AA sequence:UniProtKB:P32959;locus_tag=GNDLBLIP_00148;product=Penicillin-binding protein 4*
33958	Prodigal:2.6	CDS	111844	112236	.	+	0	ID=GNDLBLIP_00149;inference=ab initio prediction:Prodigal:2.6;locus_tag=GNDLBLIP_00149;product=hypothetical protein
33958	Prodigal:2.6	CDS	112301	114160	.	+	0	ID=GNDLBLIP_00150;eC_number=3.1.1.84;Name=cocE_1;gene=cocE_1;inference=ab initio prediction:Prodigal:2.6,similar to AA sequence:UniProtKB:Q9L9D7;locus_tag=GNDLBLIP_00150;product=Cocaine esterase
33958	Prodigal:2.6	CDS	114260	115144	.	+	0	ID=GNDLBLIP_00151;inference=ab initio prediction:Prodigal:2.6;locus_tag=GNDLBLIP_00151;product=hypothetical protein
33958	Prodigal:2.6	CDS	115187	115420	.	-	0	ID=GNDLBLIP_00152;inference=ab initio prediction:Prodigal:2.6;locus_tag=GNDLBLIP_00152;product=hypothetical protein
33958	Prodigal:2.6	CDS	115716	118013	.	-	0	ID=GNDLBLIP_00153;inference=ab initio prediction:Prodigal:2.6;locus_tag=GNDLBLIP_00153;product=hypothetical protein
33958	Prodigal:2.6	CDS	118010	119428	.	-	0	ID=GNDLBLIP_00154;eC_number=3.1.4.53;Name=cpdA_1;gene=cpdA_1;inference=ab initio prediction:Prodigal:2.6,protein motif:HAMAP:MF_00905;locus_tag=GNDLBLIP_00154;product=3'%2C5'-cyclic adenosine monophosphate phosphodiesterase CpdA
33958	Prodigal:2.6	CDS	119455	120420	.	+	0	ID=GNDLBLIP_00155;inference=ab initio prediction:Prodigal:2.6;locus_tag=GNDLBLIP_00155;product=hypothetical protein
33958	Prodigal:2.6	CDS	120417	120620	.	+	0	ID=GNDLBLIP_00156;inference=ab initio prediction:Prodigal:2.6;locus_tag=GNDLBLIP_00156;product=hypothetical protein
33958	Prodigal:2.6	CDS	120617	122554	.	-	0	ID=GNDLBLIP_00157;inference=ab initio prediction:Prodigal:2.6;locus_tag=GNDLBLIP_00157;product=hypothetical protein
33958	Prodigal:2.6	CDS	123426	124433	.	+	0	ID=GNDLBLIP_00158;eC_number=3.2.1.96;Name=endOF2;gene=endOF2;inference=ab initio prediction:Prodigal:2.6,similar to AA sequence:UniProtKB:P36912;locus_tag=GNDLBLIP_00158;product=Endo-beta-N-acetylglucosaminidase F2
33958	Prodigal:2.6	CDS	124551	125540	.	+	0	ID=GNDLBLIP_00159;eC_number=3.2.1.96;Name=endOF3;gene=endOF3;inference=ab initio prediction:Prodigal:2.6,similar to AA sequence:UniProtKB:P36913;locus_tag=GNDLBLIP_00159;product=Endo-beta-N-acetylglucosaminidase F3
33958	Prodigal:2.6	CDS	125734	127113	.	-	0	ID=GNDLBLIP_00160;eC_number=1.6.5.11;Name=nuoN;dbxref=COG:COG1007;gene=nuoN;inference=ab initio prediction:Prodigal:2.6,similar to AA sequence:UniProtKB:P9WIW9;locus_tag=GNDLBLIP_00160;product=NADH-quinone oxidoreductase subunit N
33958	Prodigal:2.6	CDS	127125	128612	.	-	0	ID=GNDLBLIP_00161;eC_number=1.6.5.11;Name=nuoM;dbxref=COG:COG1008;gene=nuoM;inference=ab initio prediction:Prodigal:2.6,similar to AA sequence:UniProtKB:P0AFE8;locus_tag=GNDLBLIP_00161;product=NADH-quinone oxidoreductase subunit M
33958	Prodigal:2.6	CDS	128614	130512	.	-	0	ID=GNDLBLIP_00162;eC_number=1.6.5.11;dbxref=COG:COG1009;inference=ab initio prediction:Prodigal:2.6,similar to AA sequence:UniProtKB:Q56227;locus_tag=GNDLBLIP_00162;product=NADH-quinone oxidoreductase subunit 12
33958	Prodigal:2.6	CDS	130519	130851	.	-	0	ID=GNDLBLIP_00163;eC_number=1.6.5.11;dbxref=COG:COG0713;inference=ab initio prediction:Prodigal:2.6,similar to AA sequence:UniProtKB:P29923;locus_tag=GNDLBLIP_00163;product=NADH-quinone oxidoreductase subunit 11
33958	Prodigal:2.6	CDS	130853	131347	.	-	0	ID=GNDLBLIP_00164;eC_number=1.6.5.11;Name=nuoJ;dbxref=COG:COG0839;gene=nuoJ;inference=ab initio prediction:Prodigal:2.6,similar to AA sequence:UniProtKB:P0AFE0;locus_tag=GNDLBLIP_00164;product=NADH-quinone oxidoreductase subunit J
33958	Prodigal:2.6	CDS	131347	131886	.	-	0	ID=GNDLBLIP_00165;eC_number=1.6.5.11;Name=nqo9;dbxref=COG:COG1143;gene=nqo9;inference=ab initio prediction:Prodigal:2.6,similar to AA sequence:UniProtKB:Q56224;locus_tag=GNDLBLIP_00165;product=NADH-quinone oxidoreductase subunit 9
33958	Prodigal:2.6	CDS	132009	133040	.	-	0	ID=GNDLBLIP_00166;eC_number=1.6.5.11;Name=nuoH;dbxref=COG:COG1005;gene=nuoH;inference=ab initio prediction:Prodigal:2.6,similar to AA sequence:UniProtKB:P9WIX1;locus_tag=GNDLBLIP_00166;product=NADH-quinone oxidoreductase subunit H
33958	Prodigal:2.6	CDS	133044	134042	.	-	0	ID=GNDLBLIP_00167;eC_number=1.6.5.11;Name=nqo3;dbxref=COG:COG1034;gene=nqo3;inference=ab initio prediction:Prodigal:2.6,similar to AA sequence:UniProtKB:P29915;locus_tag=GNDLBLIP_00167;product=NADH-quinone oxidoreductase chain 3
33958	Prodigal:2.6	CDS	134084	134932	.	-	0	ID=GNDLBLIP_00168;inference=ab initio prediction:Prodigal:2.6;locus_tag=GNDLBLIP_00168;product=hypothetical protein
33958	Prodigal:2.6	CDS	134951	136309	.	-	0	ID=GNDLBLIP_00169;eC_number=1.6.5.11;Name=nqo1;dbxref=COG:COG1894;gene=nqo1;inference=ab initio prediction:Prodigal:2.6,similar to AA sequence:UniProtKB:Q56222;locus_tag=GNDLBLIP_00169;product=NADH-quinone oxidoreductase subunit 1
33958	Prodigal:2.6	CDS	136320	136829	.	-	0	ID=GNDLBLIP_00170;eC_number=1.6.5.11;Name=nqo2;dbxref=COG:COG1905;gene=nqo2;inference=ab initio prediction:Prodigal:2.6,similar to AA sequence:UniProtKB:P29914;locus_tag=GNDLBLIP_00170;product=NADH-quinone oxidoreductase chain 2
33958	Prodigal:2.6	CDS	136924	138147	.	-	0	ID=GNDLBLIP_00171;eC_number=1.6.5.11;Name=nqo4;dbxref=COG:COG0649;gene=nqo4;inference=ab initio prediction:Prodigal:2.6,similar to AA sequence:UniProtKB:Q56220;locus_tag=GNDLBLIP_00171;product=NADH-quinone oxidoreductase subunit 4
33958	Prodigal:2.6	CDS	138223	138723	.	-	0	ID=GNDLBLIP_00172;eC_number=1.6.5.11;Name=nqo5;dbxref=COG:COG0852;gene=nqo5;inference=ab initio prediction:Prodigal:2.6,similar to AA sequence:UniProtKB:Q56219;locus_tag=GNDLBLIP_00172;product=NADH-quinone oxidoreductase subunit 5
33958	Prodigal:2.6	CDS	138728	139276	.	-	0	ID=GNDLBLIP_00173;eC_number=1.6.5.11;Name=nqo6;dbxref=COG:COG0377;gene=nqo6;inference=ab initio prediction:Prodigal:2.6,similar to AA sequence:UniProtKB:Q56218;locus_tag=GNDLBLIP_00173;product=NADH-quinone oxidoreductase subunit 6
33958	Prodigal:2.6	CDS	139313	139678	.	-	0	ID=GNDLBLIP_00174;eC_number=1.6.5.-;Name=ndhC;gene=ndhC;inference=ab initio prediction:Prodigal:2.6,similar to AA sequence:UniProtKB:P19045;locus_tag=GNDLBLIP_00174;product=NAD(P)H-quinone oxidoreductase subunit 3
33958	Prodigal:2.6	CDS	139797	139979	.	-	0	ID=GNDLBLIP_00175;inference=ab initio prediction:Prodigal:2.6;locus_tag=GNDLBLIP_00175;product=hypothetical protein
33958	Prodigal:2.6	CDS	140006	140482	.	-	0	ID=GNDLBLIP_00176;inference=ab initio prediction:Prodigal:2.6;locus_tag=GNDLBLIP_00176;product=hypothetical protein
33958	Prodigal:2.6	CDS	140491	141129	.	-	0	ID=GNDLBLIP_00177;inference=ab initio prediction:Prodigal:2.6;locus_tag=GNDLBLIP_00177;product=hypothetical protein
33958	Prodigal:2.6	CDS	141346	141924	.	+	0	ID=GNDLBLIP_00178;inference=ab initio prediction:Prodigal:2.6;locus_tag=GNDLBLIP_00178;product=hypothetical protein
33958	Prodigal:2.6	CDS	142126	142524	.	+	0	ID=GNDLBLIP_00179;inference=ab initio prediction:Prodigal:2.6;locus_tag=GNDLBLIP_00179;product=hypothetical protein
33958	Prodigal:2.6	CDS	142570	143637	.	+	0	ID=GNDLBLIP_00180;Name=atpB;dbxref=COG:COG0356;gene=atpB;inference=ab initio prediction:Prodigal:2.6,similar to AA sequence:UniProtKB:O05330;locus_tag=GNDLBLIP_00180;product=ATP synthase subunit a
33958	Prodigal:2.6	CDS	143691	143900	.	+	0	ID=GNDLBLIP_00181;Name=atpE;gene=atpE;inference=ab initio prediction:Prodigal:2.6,similar to AA sequence:UniProtKB:Q2RFX4;locus_tag=GNDLBLIP_00181;product=ATP synthase subunit c
33958	Prodigal:2.6	CDS	143986	144480	.	+	0	ID=GNDLBLIP_00182;Name=atpF;gene=atpF;inference=ab initio prediction:Prodigal:2.6,similar to AA sequence:UniProtKB:Q7A4E7;locus_tag=GNDLBLIP_00182;product=ATP synthase subunit b
33958	Prodigal:2.6	CDS	144482	145021	.	+	0	ID=GNDLBLIP_00183;Name=atpH;dbxref=COG:COG0712;gene=atpH;inference=ab initio prediction:Prodigal:2.6,similar to AA sequence:UniProtKB:Q2RFX6;locus_tag=GNDLBLIP_00183;product=ATP synthase subunit delta
33958	Prodigal:2.6	CDS	145037	146614	.	+	0	ID=GNDLBLIP_00184;eC_number=3.6.3.14;Name=atpA;dbxref=COG:COG0056;gene=atpA;inference=ab initio prediction:Prodigal:2.6,similar to AA sequence:UniProtKB:Q07405;locus_tag=GNDLBLIP_00184;product=ATP synthase subunit alpha
33958	Prodigal:2.6	CDS	146692	147564	.	+	0	ID=GNDLBLIP_00185;Name=atpG;gene=atpG;inference=ab initio prediction:Prodigal:2.6,similar to AA sequence:UniProtKB:P29710;locus_tag=GNDLBLIP_00185;product=ATP synthase gamma chain%2C sodium ion specific
33958	Prodigal:2.6	CDS	147600	148040	.	+	0	ID=GNDLBLIP_00186;inference=ab initio prediction:Prodigal:2.6;locus_tag=GNDLBLIP_00186;product=hypothetical protein
33958	Prodigal:2.6	CDS	148135	149493	.	+	0	ID=GNDLBLIP_00187;inference=ab initio prediction:Prodigal:2.6,similar to AA sequence:UniProtKB:P9WFP3;locus_tag=GNDLBLIP_00187;note=UPF0053 protein Rv1842c;product=hypothetical protein
33958	Prodigal:2.6	CDS	149474	149782	.	+	0	ID=GNDLBLIP_00188;Name=clpS;gene=clpS;inference=ab initio prediction:Prodigal:2.6,protein motif:HAMAP:MF_00302;locus_tag=GNDLBLIP_00188;product=ATP-dependent Clp protease adapter protein ClpS
33958	Prodigal:2.6	CDS	149939	150280	.	-	0	ID=GNDLBLIP_00189;inference=ab initio prediction:Prodigal:2.6;locus_tag=GNDLBLIP_00189;product=hypothetical protein
33958	Prodigal:2.6	CDS	150277	151020	.	-	0	ID=GNDLBLIP_00190;inference=ab initio prediction:Prodigal:2.6;locus_tag=GNDLBLIP_00190;product=hypothetical protein
33958	Prodigal:2.6	CDS	151214	151999	.	-	0	ID=GNDLBLIP_00191;inference=ab initio prediction:Prodigal:2.6;locus_tag=GNDLBLIP_00191;product=hypothetical protein
33958	Prodigal:2.6	CDS	152194	153729	.	-	0	ID=GNDLBLIP_00192;inference=ab initio prediction:Prodigal:2.6;locus_tag=GNDLBLIP_00192;product=hypothetical protein
33958	Prodigal:2.6	CDS	153834	154619	.	-	0	ID=GNDLBLIP_00193;inference=ab initio prediction:Prodigal:2.6;locus_tag=GNDLBLIP_00193;product=hypothetical protein
33958	Prodigal:2.6	CDS	154677	155336	.	+	0	ID=GNDLBLIP_00194;eC_number=2.1.1.185;Name=rlmB_1;dbxref=COG:COG0566;gene=rlmB_1;inference=ab initio prediction:Prodigal:2.6,similar to AA sequence:UniProtKB:P44906;locus_tag=GNDLBLIP_00194;product=23S rRNA (guanosine-2'-O-)-methyltransferase RlmB
33958	Prodigal:2.6	CDS	155392	155643	.	+	0	ID=GNDLBLIP_00195;inference=ab initio prediction:Prodigal:2.6;locus_tag=GNDLBLIP_00195;product=hypothetical protein
33958	Prodigal:2.6	CDS	155685	156221	.	+	0	ID=GNDLBLIP_00196;inference=ab initio prediction:Prodigal:2.6;locus_tag=GNDLBLIP_00196;product=hypothetical protein
33958	Prodigal:2.6	CDS	156229	156675	.	-	0	ID=GNDLBLIP_00197;inference=ab initio prediction:Prodigal:2.6;locus_tag=GNDLBLIP_00197;product=hypothetical protein
33958	Prodigal:2.6	CDS	156679	156987	.	-	0	ID=GNDLBLIP_00198;inference=ab initio prediction:Prodigal:2.6;locus_tag=GNDLBLIP_00198;product=hypothetical protein
33958	Prodigal:2.6	CDS	157257	157412	.	-	0	ID=GNDLBLIP_00199;inference=ab initio prediction:Prodigal:2.6;locus_tag=GNDLBLIP_00199;product=hypothetical protein
33958	Prodigal:2.6	CDS	157576	158244	.	-	0	ID=GNDLBLIP_00200;eC_number=2.7.4.25;Name=cmk_1;dbxref=COG:COG0283;gene=cmk_1;inference=ab initio prediction:Prodigal:2.6,similar to AA sequence:UniProtKB:Q97PK6;locus_tag=GNDLBLIP_00200;product=Cytidylate kinase
33958	Prodigal:2.6	CDS	158500	159204	.	+	0	ID=GNDLBLIP_00201;eC_number=2.7.4.22;Name=pyrH;dbxref=COG:COG0528;gene=pyrH;inference=ab initio prediction:Prodigal:2.6,similar to AA sequence:UniProtKB:P59009;locus_tag=GNDLBLIP_00201;product=Uridylate kinase
33958	Prodigal:2.6	CDS	159270	159824	.	+	0	ID=GNDLBLIP_00202;Name=frr;dbxref=COG:COG0233;gene=frr;inference=ab initio prediction:Prodigal:2.6,similar to AA sequence:UniProtKB:P81101;locus_tag=GNDLBLIP_00202;product=Ribosome-recycling factor
33958	Prodigal:2.6	CDS	159917	160981	.	+	0	ID=GNDLBLIP_00203;eC_number=3.1.6.1;Name=atsA_2;dbxref=COG:COG3119;gene=atsA_2;inference=ab initio prediction:Prodigal:2.6,similar to AA sequence:UniProtKB:P51691;locus_tag=GNDLBLIP_00203;product=Arylsulfatase
33958	Prodigal:2.6	CDS	160978	161499	.	+	0	ID=GNDLBLIP_00204;eC_number=3.1.4.-;inference=ab initio prediction:Prodigal:2.6,similar to AA sequence:UniProtKB:Q1M964;locus_tag=GNDLBLIP_00204;product=Multifunctional alkaline phosphatase superfamily protein
33958	Prodigal:2.6	CDS	161860	162189	.	+	0	ID=GNDLBLIP_00205;inference=ab initio prediction:Prodigal:2.6;locus_tag=GNDLBLIP_00205;product=hypothetical protein
33958	Prodigal:2.6	CDS	162381	162722	.	+	0	ID=GNDLBLIP_00206;inference=ab initio prediction:Prodigal:2.6;locus_tag=GNDLBLIP_00206;product=hypothetical protein
33958	Prodigal:2.6	CDS	162949	163266	.	+	0	ID=GNDLBLIP_00207;inference=ab initio prediction:Prodigal:2.6;locus_tag=GNDLBLIP_00207;product=hypothetical protein
33958	Prodigal:2.6	CDS	163429	163731	.	+	0	ID=GNDLBLIP_00208;eC_number=3.5.1.5;Name=ureA_1;gene=ureA_1;inference=ab initio prediction:Prodigal:2.6,similar to AA sequence:UniProtKB:P41022;locus_tag=GNDLBLIP_00208;product=Urease subunit gamma
33958	Prodigal:2.6	CDS	163743	164111	.	+	0	ID=GNDLBLIP_00209;eC_number=3.5.1.5;Name=ureA_2;dbxref=COG:COG0831;gene=ureA_2;inference=ab initio prediction:Prodigal:2.6,similar to AA sequence:UniProtKB:P14916;locus_tag=GNDLBLIP_00209;product=Urease subunit alpha
33958	Prodigal:2.6	CDS	164114	165835	.	+	0	ID=GNDLBLIP_00210;eC_number=3.5.1.5;Name=ureC;gene=ureC;inference=ab initio prediction:Prodigal:2.6,similar to AA sequence:UniProtKB:Q07397;locus_tag=GNDLBLIP_00210;product=Urease subunit alpha
33958	Prodigal:2.6	CDS	165927	166601	.	+	0	ID=GNDLBLIP_00211;inference=ab initio prediction:Prodigal:2.6;locus_tag=GNDLBLIP_00211;product=hypothetical protein
33958	Prodigal:2.6	CDS	166591	167103	.	+	0	ID=GNDLBLIP_00212;Name=ureE;dbxref=COG:COG2371;gene=ureE;inference=ab initio prediction:Prodigal:2.6,similar to AA sequence:UniProtKB:Q09064;locus_tag=GNDLBLIP_00212;product=Urease accessory protein UreE
33958	Prodigal:2.6	CDS	167096	167794	.	+	0	ID=GNDLBLIP_00213;Name=ureF;dbxref=COG:COG0830;gene=ureF;inference=ab initio prediction:Prodigal:2.6,similar to AA sequence:UniProtKB:Q09065;locus_tag=GNDLBLIP_00213;product=Urease accessory protein UreF
33958	Prodigal:2.6	CDS	167826	168464	.	+	0	ID=GNDLBLIP_00214;Name=ureG;dbxref=COG:COG0378;gene=ureG;inference=ab initio prediction:Prodigal:2.6,similar to AA sequence:UniProtKB:Q09066;locus_tag=GNDLBLIP_00214;product=Urease accessory protein UreG
33958	Prodigal:2.6	CDS	168465	169253	.	+	0	ID=GNDLBLIP_00215;Name=ureH;dbxref=COG:COG0829;gene=ureH;inference=ab initio prediction:Prodigal:2.6,similar to AA sequence:UniProtKB:Q09067;locus_tag=GNDLBLIP_00215;product=Urease accessory protein UreH
33958	Prodigal:2.6	CDS	169266	169967	.	+	0	ID=GNDLBLIP_00216;inference=ab initio prediction:Prodigal:2.6;locus_tag=GNDLBLIP_00216;product=hypothetical protein
33958	Prodigal:2.6	CDS	169987	170538	.	+	0	ID=GNDLBLIP_00217;dbxref=COG:COG4413;inference=ab initio prediction:Prodigal:2.6,similar to AA sequence:UniProtKB:Q72CX3;locus_tag=GNDLBLIP_00217;product=Urea transporter
33958	Prodigal:2.6	CDS	170592	170873	.	+	0	ID=GNDLBLIP_00218;inference=ab initio prediction:Prodigal:2.6;locus_tag=GNDLBLIP_00218;product=hypothetical protein
33958	Prodigal:2.6	CDS	170957	173251	.	+	0	ID=GNDLBLIP_00219;Name=btuB_2;gene=btuB_2;inference=ab initio prediction:Prodigal:2.6,protein motif:HAMAP:MF_01531;locus_tag=GNDLBLIP_00219;product=Vitamin B12 transporter BtuB
33958	Prodigal:2.6	CDS	173267	174157	.	+	0	ID=GNDLBLIP_00220;Name=chbR_1;gene=chbR_1;inference=ab initio prediction:Prodigal:2.6,similar to AA sequence:UniProtKB:P17410;locus_tag=GNDLBLIP_00220;product=HTH-type transcriptional regulator ChbR
33958	Prodigal:2.6	CDS	174202	174945	.	-	0	ID=GNDLBLIP_00221;inference=ab initio prediction:Prodigal:2.6;locus_tag=GNDLBLIP_00221;product=hypothetical protein
33958	Prodigal:2.6	CDS	175431	176654	.	+	0	ID=GNDLBLIP_00222;inference=ab initio prediction:Prodigal:2.6;locus_tag=GNDLBLIP_00222;product=hypothetical protein
33958	Prodigal:2.6	CDS	176679	179612	.	+	0	ID=GNDLBLIP_00223;Name=susC_3;gene=susC_3;inference=ab initio prediction:Prodigal:2.6,similar to AA sequence:UniProtKB:Q8A1G1;locus_tag=GNDLBLIP_00223;product=TonB-dependent receptor SusC
33958	Prodigal:2.6	CDS	179630	181084	.	+	0	ID=GNDLBLIP_00224;inference=ab initio prediction:Prodigal:2.6;locus_tag=GNDLBLIP_00224;product=hypothetical protein
33958	Prodigal:2.6	CDS	181314	181511	.	-	0	ID=GNDLBLIP_00225;inference=ab initio prediction:Prodigal:2.6;locus_tag=GNDLBLIP_00225;product=hypothetical protein
33958	Prodigal:2.6	CDS	181664	182149	.	-	0	ID=GNDLBLIP_00226;inference=ab initio prediction:Prodigal:2.6;locus_tag=GNDLBLIP_00226;product=hypothetical protein
33958	Prodigal:2.6	CDS	182549	183628	.	+	0	ID=GNDLBLIP_00227;inference=ab initio prediction:Prodigal:2.6;locus_tag=GNDLBLIP_00227;product=hypothetical protein
33958	Prodigal:2.6	CDS	183649	183867	.	+	0	ID=GNDLBLIP_00228;inference=ab initio prediction:Prodigal:2.6;locus_tag=GNDLBLIP_00228;product=hypothetical protein
33958	Prodigal:2.6	CDS	183875	184090	.	+	0	ID=GNDLBLIP_00229;inference=ab initio prediction:Prodigal:2.6;locus_tag=GNDLBLIP_00229;product=hypothetical protein
33958	Prodigal:2.6	CDS	184370	184996	.	+	0	ID=GNDLBLIP_00230;inference=ab initio prediction:Prodigal:2.6;locus_tag=GNDLBLIP_00230;product=hypothetical protein
33958	Prodigal:2.6	CDS	184998	185636	.	+	0	ID=GNDLBLIP_00231;inference=ab initio prediction:Prodigal:2.6;locus_tag=GNDLBLIP_00231;product=hypothetical protein
33958	Prodigal:2.6	CDS	185711	185869	.	+	0	ID=GNDLBLIP_00232;inference=ab initio prediction:Prodigal:2.6;locus_tag=GNDLBLIP_00232;product=hypothetical protein
33958	Prodigal:2.6	CDS	185903	186052	.	+	0	ID=GNDLBLIP_00233;inference=ab initio prediction:Prodigal:2.6;locus_tag=GNDLBLIP_00233;product=hypothetical protein
33958	Prodigal:2.6	CDS	186058	186516	.	+	0	ID=GNDLBLIP_00234;inference=ab initio prediction:Prodigal:2.6;locus_tag=GNDLBLIP_00234;product=hypothetical protein
33958	Prodigal:2.6	CDS	186528	186671	.	+	0	ID=GNDLBLIP_00235;inference=ab initio prediction:Prodigal:2.6;locus_tag=GNDLBLIP_00235;product=hypothetical protein
33958	Prodigal:2.6	CDS	186674	186820	.	+	0	ID=GNDLBLIP_00236;inference=ab initio prediction:Prodigal:2.6;locus_tag=GNDLBLIP_00236;product=hypothetical protein
33958	Prodigal:2.6	CDS	186810	187511	.	+	0	ID=GNDLBLIP_00237;inference=ab initio prediction:Prodigal:2.6;locus_tag=GNDLBLIP_00237;product=hypothetical protein
33958	Prodigal:2.6	CDS	187515	187892	.	-	0	ID=GNDLBLIP_00238;inference=ab initio prediction:Prodigal:2.6;locus_tag=GNDLBLIP_00238;product=hypothetical protein
33958	Prodigal:2.6	CDS	187924	188598	.	+	0	ID=GNDLBLIP_00239;inference=ab initio prediction:Prodigal:2.6;locus_tag=GNDLBLIP_00239;product=hypothetical protein
33958	Prodigal:2.6	CDS	188598	188942	.	+	0	ID=GNDLBLIP_00240;inference=ab initio prediction:Prodigal:2.6;locus_tag=GNDLBLIP_00240;product=hypothetical protein
33958	Prodigal:2.6	CDS	188963	189223	.	+	0	ID=GNDLBLIP_00241;inference=ab initio prediction:Prodigal:2.6;locus_tag=GNDLBLIP_00241;product=hypothetical protein
33958	Prodigal:2.6	CDS	189225	189431	.	+	0	ID=GNDLBLIP_00242;inference=ab initio prediction:Prodigal:2.6;locus_tag=GNDLBLIP_00242;product=hypothetical protein
33958	Prodigal:2.6	CDS	189409	189639	.	+	0	ID=GNDLBLIP_00243;inference=ab initio prediction:Prodigal:2.6;locus_tag=GNDLBLIP_00243;product=hypothetical protein
33958	Prodigal:2.6	CDS	189807	191222	.	+	0	ID=GNDLBLIP_00244;inference=ab initio prediction:Prodigal:2.6;locus_tag=GNDLBLIP_00244;product=hypothetical protein
33958	Prodigal:2.6	CDS	191235	191804	.	+	0	ID=GNDLBLIP_00245;inference=ab initio prediction:Prodigal:2.6;locus_tag=GNDLBLIP_00245;product=hypothetical protein
33958	Prodigal:2.6	CDS	192032	192991	.	+	0	ID=GNDLBLIP_00246;inference=ab initio prediction:Prodigal:2.6;locus_tag=GNDLBLIP_00246;product=hypothetical protein
33958	Prodigal:2.6	CDS	193226	194170	.	-	0	ID=GNDLBLIP_00247;eC_number=1.3.1.103;inference=ab initio prediction:Prodigal:2.6,similar to AA sequence:UniProtKB:Q59I44;locus_tag=GNDLBLIP_00247;product=2-haloacrylate reductase
33958	Prodigal:2.6	CDS	194210	194587	.	-	0	ID=GNDLBLIP_00248;inference=ab initio prediction:Prodigal:2.6;locus_tag=GNDLBLIP_00248;product=hypothetical protein
33958	Prodigal:2.6	CDS	194939	195781	.	-	0	ID=GNDLBLIP_00249;inference=ab initio prediction:Prodigal:2.6;locus_tag=GNDLBLIP_00249;product=hypothetical protein
33958	Prodigal:2.6	CDS	196076	196429	.	-	0	ID=GNDLBLIP_00250;inference=ab initio prediction:Prodigal:2.6;locus_tag=GNDLBLIP_00250;product=hypothetical protein
33958	Prodigal:2.6	CDS	196668	197222	.	-	0	ID=GNDLBLIP_00251;inference=ab initio prediction:Prodigal:2.6;locus_tag=GNDLBLIP_00251;product=hypothetical protein
33958	Prodigal:2.6	CDS	198598	199368	.	-	0	ID=GNDLBLIP_00252;inference=ab initio prediction:Prodigal:2.6;locus_tag=GNDLBLIP_00252;product=hypothetical protein
33958	Prodigal:2.6	CDS	199337	202030	.	-	0	ID=GNDLBLIP_00253;eC_number=3.1.-.-;Name=wapA;gene=wapA;inference=ab initio prediction:Prodigal:2.6,similar to AA sequence:UniProtKB:D4G3R4;locus_tag=GNDLBLIP_00253;product=tRNA(Glu)-specific nuclease WapA
33958	Prodigal:2.6	CDS	202054	202545	.	-	0	ID=GNDLBLIP_00254;inference=ab initio prediction:Prodigal:2.6;locus_tag=GNDLBLIP_00254;product=hypothetical protein
33958	Prodigal:2.6	CDS	202542	202799	.	-	0	ID=GNDLBLIP_00255;inference=ab initio prediction:Prodigal:2.6;locus_tag=GNDLBLIP_00255;product=hypothetical protein
33958	Prodigal:2.6	CDS	203049	205928	.	-	0	ID=GNDLBLIP_00256;inference=ab initio prediction:Prodigal:2.6;locus_tag=GNDLBLIP_00256;product=hypothetical protein
33958	Prodigal:2.6	CDS	206021	207160	.	-	0	ID=GNDLBLIP_00257;inference=ab initio prediction:Prodigal:2.6;locus_tag=GNDLBLIP_00257;product=hypothetical protein
33958	Prodigal:2.6	CDS	207503	208198	.	-	0	ID=GNDLBLIP_00258;inference=ab initio prediction:Prodigal:2.6;locus_tag=GNDLBLIP_00258;product=hypothetical protein
33958	Prodigal:2.6	CDS	208351	208626	.	-	0	ID=GNDLBLIP_00259;inference=ab initio prediction:Prodigal:2.6;locus_tag=GNDLBLIP_00259;product=hypothetical protein
33958	Prodigal:2.6	CDS	208632	210899	.	-	0	ID=GNDLBLIP_00260;inference=ab initio prediction:Prodigal:2.6;locus_tag=GNDLBLIP_00260;product=hypothetical protein
33958	Prodigal:2.6	CDS	211066	212136	.	-	0	ID=GNDLBLIP_00261;inference=ab initio prediction:Prodigal:2.6;locus_tag=GNDLBLIP_00261;product=hypothetical protein
33958	Prodigal:2.6	CDS	212474	212767	.	-	0	ID=GNDLBLIP_00262;inference=ab initio prediction:Prodigal:2.6;locus_tag=GNDLBLIP_00262;product=hypothetical protein
33958	Prodigal:2.6	CDS	212829	213335	.	-	0	ID=GNDLBLIP_00263;inference=ab initio prediction:Prodigal:2.6;locus_tag=GNDLBLIP_00263;product=hypothetical protein
33958	Prodigal:2.6	CDS	213719	214219	.	-	0	ID=GNDLBLIP_00264;eC_number=3.4.-.-;Name=cwlK_1;gene=cwlK_1;inference=ab initio prediction:Prodigal:2.6,similar to AA sequence:UniProtKB:O34360;locus_tag=GNDLBLIP_00264;product=Peptidoglycan L-alanyl-D-glutamate endopeptidase CwlK
33958	Prodigal:2.6	CDS	214548	215102	.	-	0	ID=GNDLBLIP_00265;inference=ab initio prediction:Prodigal:2.6;locus_tag=GNDLBLIP_00265;product=hypothetical protein
33958	Prodigal:2.6	CDS	215068	215295	.	-	0	ID=GNDLBLIP_00266;inference=ab initio prediction:Prodigal:2.6;locus_tag=GNDLBLIP_00266;product=hypothetical protein
33958	Prodigal:2.6	CDS	215434	215901	.	+	0	ID=GNDLBLIP_00267;inference=ab initio prediction:Prodigal:2.6;locus_tag=GNDLBLIP_00267;product=hypothetical protein
33958	Prodigal:2.6	CDS	215883	216560	.	+	0	ID=GNDLBLIP_00268;inference=ab initio prediction:Prodigal:2.6;locus_tag=GNDLBLIP_00268;product=hypothetical protein
33958	Prodigal:2.6	CDS	216565	216735	.	+	0	ID=GNDLBLIP_00269;inference=ab initio prediction:Prodigal:2.6;locus_tag=GNDLBLIP_00269;product=hypothetical protein
33958	Prodigal:2.6	CDS	216767	218272	.	+	0	ID=GNDLBLIP_00270;Name=fptA_1;dbxref=COG:COG4773;gene=fptA_1;inference=ab initio prediction:Prodigal:2.6,similar to AA sequence:UniProtKB:P42512;locus_tag=GNDLBLIP_00270;product=Fe(3+)-pyochelin receptor
33958	Prodigal:2.6	CDS	218257	218964	.	+	0	ID=GNDLBLIP_00271;Name=fhuA_2;dbxref=COG:COG1629;gene=fhuA_2;inference=ab initio prediction:Prodigal:2.6,similar to AA sequence:UniProtKB:P06971;locus_tag=GNDLBLIP_00271;product=Ferrichrome outer membrane transporter/phage receptor
33958	Prodigal:2.6	CDS	219053	220273	.	-	0	ID=GNDLBLIP_00272;inference=ab initio prediction:Prodigal:2.6;locus_tag=GNDLBLIP_00272;product=hypothetical protein
33958	Prodigal:2.6	CDS	220297	221373	.	-	0	ID=GNDLBLIP_00273;Name=msrAB;dbxref=COG:COG0225;gene=msrAB;inference=ab initio prediction:Prodigal:2.6,similar to AA sequence:UniProtKB:P45213;locus_tag=GNDLBLIP_00273;product=Peptide methionine sulfoxide reductase MsrA/MsrB
33958	Prodigal:2.6	CDS	221370	221825	.	-	0	ID=GNDLBLIP_00274;Name=rclC_1;dbxref=COG:COG3059;gene=rclC_1;inference=ab initio prediction:Prodigal:2.6,similar to AA sequence:UniProtKB:P75685;locus_tag=GNDLBLIP_00274;product=Inner membrane protein RclC
33958	Prodigal:2.6	CDS	221913	222110	.	-	0	ID=GNDLBLIP_00275;inference=ab initio prediction:Prodigal:2.6;locus_tag=GNDLBLIP_00275;product=hypothetical protein
33958	Prodigal:2.6	CDS	222180	222734	.	-	0	ID=GNDLBLIP_00276;Name=sigW_1;dbxref=COG:COG1595;gene=sigW_1;inference=ab initio prediction:Prodigal:2.6,similar to AA sequence:UniProtKB:Q45585;locus_tag=GNDLBLIP_00276;product=ECF RNA polymerase sigma factor SigW
33958	Prodigal:2.6	CDS	222779	223888	.	-	0	ID=GNDLBLIP_00277;eC_number=2.3.1.-;Name=oatA;gene=oatA;inference=ab initio prediction:Prodigal:2.6,similar to AA sequence:UniProtKB:Q7A3D6;locus_tag=GNDLBLIP_00277;product=O-acetyltransferase OatA
33958	Prodigal:2.6	CDS	224070	224618	.	+	0	ID=GNDLBLIP_00278;inference=ab initio prediction:Prodigal:2.6;locus_tag=GNDLBLIP_00278;product=hypothetical protein
33958	Prodigal:2.6	CDS	224633	225130	.	+	0	ID=GNDLBLIP_00279;eC_number=2.7.13.3;Name=btsS_1;dbxref=COG:COG3275;gene=btsS_1;inference=ab initio prediction:Prodigal:2.6,similar to AA sequence:UniProtKB:P0AD14;locus_tag=GNDLBLIP_00279;product=Sensor histidine kinase BtsS
33958	Prodigal:2.6	CDS	225123	225824	.	+	0	ID=GNDLBLIP_00280;Name=btsR_1;dbxref=COG:COG3279;gene=btsR_1;inference=ab initio prediction:Prodigal:2.6,similar to AA sequence:UniProtKB:P0AFT5;locus_tag=GNDLBLIP_00280;product=Transcriptional regulatory protein BtsR
33958	Prodigal:2.6	CDS	225828	226178	.	-	0	ID=GNDLBLIP_00281;inference=ab initio prediction:Prodigal:2.6;locus_tag=GNDLBLIP_00281;product=hypothetical protein
33958	Prodigal:2.6	CDS	226175	226771	.	-	0	ID=GNDLBLIP_00282;eC_number=3.1.1.23;dbxref=COG:COG2267;inference=ab initio prediction:Prodigal:2.6,similar to AA sequence:UniProtKB:A0QNZ7;locus_tag=GNDLBLIP_00282;product=Monoacylglycerol lipase
33958	Prodigal:2.6	CDS	226813	227709	.	-	0	ID=GNDLBLIP_00283;eC_number=1.1.1.35;dbxref=COG:COG1250;inference=ab initio prediction:Prodigal:2.6,similar to AA sequence:UniProtKB:Q0AVM2;locus_tag=GNDLBLIP_00283;product=3-hydroxybutyryl-CoA dehydrogenase
33958	Prodigal:2.6	CDS	227791	229440	.	-	0	ID=GNDLBLIP_00284;eC_number=4.2.1.53;Name=ohyA_1;gene=ohyA_1;inference=ab initio prediction:Prodigal:2.6,similar to AA sequence:UniProtKB:C7DLJ6;locus_tag=GNDLBLIP_00284;product=Oleate hydratase
33958	Prodigal:2.6	CDS	229446	229730	.	-	0	ID=GNDLBLIP_00285;eC_number=4.2.1.53;Name=ohyA_2;gene=ohyA_2;inference=ab initio prediction:Prodigal:2.6,similar to AA sequence:UniProtKB:C7DLJ6;locus_tag=GNDLBLIP_00285;product=Oleate hydratase
33958	Prodigal:2.6	CDS	229826	230707	.	-	0	ID=GNDLBLIP_00286;Name=rhaS_1;gene=rhaS_1;inference=ab initio prediction:Prodigal:2.6,protein motif:HAMAP:MF_01534;locus_tag=GNDLBLIP_00286;product=HTH-type transcriptional activator RhaS
33958	Prodigal:2.6	CDS	230924	232270	.	-	0	ID=GNDLBLIP_00287;inference=ab initio prediction:Prodigal:2.6;locus_tag=GNDLBLIP_00287;product=hypothetical protein
33958	Prodigal:2.6	CDS	232721	233902	.	+	0	ID=GNDLBLIP_00288;inference=ab initio prediction:Prodigal:2.6;locus_tag=GNDLBLIP_00288;product=hypothetical protein
33958	Prodigal:2.6	CDS	233947	234420	.	+	0	ID=GNDLBLIP_00289;Name=yflS_1;dbxref=COG:COG0471;gene=yflS_1;inference=ab initio prediction:Prodigal:2.6,similar to AA sequence:UniProtKB:O34726;locus_tag=GNDLBLIP_00289;product=Putative malate transporter YflS
33958	Prodigal:2.6	CDS	234417	235376	.	+	0	ID=GNDLBLIP_00290;Name=yflS_2;dbxref=COG:COG0471;gene=yflS_2;inference=ab initio prediction:Prodigal:2.6,similar to AA sequence:UniProtKB:O34726;locus_tag=GNDLBLIP_00290;product=Putative malate transporter YflS
33958	Prodigal:2.6	CDS	235393	236049	.	+	0	ID=GNDLBLIP_00291;inference=ab initio prediction:Prodigal:2.6;locus_tag=GNDLBLIP_00291;product=hypothetical protein
33958	Prodigal:2.6	CDS	236252	237019	.	+	0	ID=GNDLBLIP_00292;eC_number=1.3.5.4;Name=frdA_1;gene=frdA_1;inference=ab initio prediction:Prodigal:2.6,similar to AA sequence:UniProtKB:V3TQ67;locus_tag=GNDLBLIP_00292;product=Fumarate reductase flavoprotein subunit
33958	Prodigal:2.6	CDS	237019	238167	.	+	0	ID=GNDLBLIP_00293;eC_number=1.3.5.4;Name=frdA_2;gene=frdA_2;inference=ab initio prediction:Prodigal:2.6,similar to AA sequence:UniProtKB:V3TQ67;locus_tag=GNDLBLIP_00293;product=Fumarate reductase flavoprotein subunit
33958	Prodigal:2.6	CDS	238185	238934	.	+	0	ID=GNDLBLIP_00294;eC_number=1.3.5.1;Name=frdB_1;dbxref=COG:COG0479;gene=frdB_1;inference=ab initio prediction:Prodigal:2.6,similar to AA sequence:UniProtKB:P17596;locus_tag=GNDLBLIP_00294;product=Fumarate reductase iron-sulfur subunit
33958	Prodigal:2.6	CDS	239207	242296	.	+	0	ID=GNDLBLIP_00295;inference=ab initio prediction:Prodigal:2.6;locus_tag=GNDLBLIP_00295;product=hypothetical protein
33958	Prodigal:2.6	CDS	242293	243477	.	+	0	ID=GNDLBLIP_00296;inference=ab initio prediction:Prodigal:2.6;locus_tag=GNDLBLIP_00296;product=hypothetical protein
33958	Prodigal:2.6	CDS	243456	244184	.	+	0	ID=GNDLBLIP_00297;inference=ab initio prediction:Prodigal:2.6;locus_tag=GNDLBLIP_00297;product=hypothetical protein
33958	Prodigal:2.6	CDS	244184	246520	.	+	0	ID=GNDLBLIP_00298;Name=bamA_1;gene=bamA_1;inference=ab initio prediction:Prodigal:2.6,protein motif:HAMAP:MF_01430;locus_tag=GNDLBLIP_00298;product=Outer membrane protein assembly factor BamA
33958	Prodigal:2.6	CDS	246522	247442	.	+	0	ID=GNDLBLIP_00299;inference=ab initio prediction:Prodigal:2.6;locus_tag=GNDLBLIP_00299;product=hypothetical protein
33958	Prodigal:2.6	CDS	247833	248144	.	-	0	ID=GNDLBLIP_00300;inference=ab initio prediction:Prodigal:2.6;locus_tag=GNDLBLIP_00300;product=hypothetical protein
33958	Prodigal:2.6	CDS	248193	248573	.	-	0	ID=GNDLBLIP_00301;eC_number=1.1.1.362;Name=dauE;gene=dauE;inference=ab initio prediction:Prodigal:2.6,similar to AA sequence:UniProtKB:Q53882;locus_tag=GNDLBLIP_00301;product=Aklaviketone reductase DauE
33958	Prodigal:2.6	CDS	248573	248947	.	-	0	ID=GNDLBLIP_00302;eC_number=1.3.1.56;Name=bphB;gene=bphB;inference=ab initio prediction:Prodigal:2.6,similar to AA sequence:UniProtKB:Q46381;locus_tag=GNDLBLIP_00302;product=Cis-2%2C3-dihydrobiphenyl-2%2C3-diol dehydrogenase
33958	Prodigal:2.6	CDS	249159	250454	.	-	0	ID=GNDLBLIP_00303;Name=eriC;dbxref=COG:COG0038;gene=eriC;inference=ab initio prediction:Prodigal:2.6,similar to AA sequence:UniProtKB:Q87WD2;locus_tag=GNDLBLIP_00303;product=Chloride/fluoride channel protein
33958	Prodigal:2.6	CDS	250632	250973	.	-	0	ID=GNDLBLIP_00304;inference=ab initio prediction:Prodigal:2.6;locus_tag=GNDLBLIP_00304;product=hypothetical protein
33958	Prodigal:2.6	CDS	250985	251815	.	-	0	ID=GNDLBLIP_00305;eC_number=2.1.1.-;inference=ab initio prediction:Prodigal:2.6,similar to AA sequence:UniProtKB:P9WFH3;locus_tag=GNDLBLIP_00305;product=Putative S-adenosyl-L-methionine-dependent methyltransferase
33958	Prodigal:2.6	CDS	251948	252436	.	-	0	ID=GNDLBLIP_00306;inference=ab initio prediction:Prodigal:2.6;locus_tag=GNDLBLIP_00306;product=hypothetical protein
33958	Prodigal:2.6	CDS	252536	253036	.	-	0	ID=GNDLBLIP_00307;inference=ab initio prediction:Prodigal:2.6;locus_tag=GNDLBLIP_00307;product=hypothetical protein
33958	Prodigal:2.6	CDS	253047	253793	.	-	0	ID=GNDLBLIP_00308;Name=yeeZ;dbxref=COG:COG0451;gene=yeeZ;inference=ab initio prediction:Prodigal:2.6,similar to AA sequence:UniProtKB:P0AD12;locus_tag=GNDLBLIP_00308;product=Protein YeeZ
33958	Prodigal:2.6	CDS	253929	254189	.	-	0	ID=GNDLBLIP_00309;Name=oprJ_1;dbxref=COG:COG1538;gene=oprJ_1;inference=ab initio prediction:Prodigal:2.6,similar to AA sequence:UniProtKB:Q51397;locus_tag=GNDLBLIP_00309;product=Outer membrane protein OprJ
33958	Prodigal:2.6	CDS	254198	254818	.	-	0	ID=GNDLBLIP_00310;Name=oprM_1;dbxref=COG:COG1538;gene=oprM_1;inference=ab initio prediction:Prodigal:2.6,similar to AA sequence:UniProtKB:Q51487;locus_tag=GNDLBLIP_00310;product=Outer membrane protein OprM
33958	Prodigal:2.6	CDS	254827	255357	.	-	0	ID=GNDLBLIP_00311;Name=oprM_2;dbxref=COG:COG1538;gene=oprM_2;inference=ab initio prediction:Prodigal:2.6,similar to AA sequence:UniProtKB:Q51487;locus_tag=GNDLBLIP_00311;product=Outer membrane protein OprM
33958	Prodigal:2.6	CDS	255370	258513	.	-	0	ID=GNDLBLIP_00312;Name=bepE_1;gene=bepE_1;inference=ab initio prediction:Prodigal:2.6,similar to AA sequence:UniProtKB:Q8G2M6;locus_tag=GNDLBLIP_00312;product=Efflux pump membrane transporter BepE
33958	Prodigal:2.6	CDS	258495	259646	.	-	0	ID=GNDLBLIP_00313;Name=mdtE_1;gene=mdtE_1;inference=ab initio prediction:Prodigal:2.6,similar to AA sequence:UniProtKB:P37636;locus_tag=GNDLBLIP_00313;product=Multidrug resistance protein MdtE
33958	Prodigal:2.6	CDS	259932	260849	.	+	0	ID=GNDLBLIP_00314;inference=ab initio prediction:Prodigal:2.6;locus_tag=GNDLBLIP_00314;product=hypothetical protein
33958	Prodigal:2.6	CDS	260846	261181	.	+	0	ID=GNDLBLIP_00315;Name=xerC_1;dbxref=COG:COG4974;gene=xerC_1;inference=ab initio prediction:Prodigal:2.6,similar to AA sequence:UniProtKB:P39776;locus_tag=GNDLBLIP_00315;product=Tyrosine recombinase XerC
33958	Prodigal:2.6	CDS	261266	261838	.	+	0	ID=GNDLBLIP_00316;inference=ab initio prediction:Prodigal:2.6;locus_tag=GNDLBLIP_00316;product=hypothetical protein
33958	Prodigal:2.6	CDS	261913	262194	.	-	0	ID=GNDLBLIP_00317;inference=ab initio prediction:Prodigal:2.6;locus_tag=GNDLBLIP_00317;product=hypothetical protein
33958	Prodigal:2.6	CDS	262191	262487	.	-	0	ID=GNDLBLIP_00318;inference=ab initio prediction:Prodigal:2.6;locus_tag=GNDLBLIP_00318;product=hypothetical protein
33958	Prodigal:2.6	CDS	262588	262971	.	-	0	ID=GNDLBLIP_00319;inference=ab initio prediction:Prodigal:2.6;locus_tag=GNDLBLIP_00319;product=hypothetical protein
33958	Prodigal:2.6	CDS	263475	263975	.	-	0	ID=GNDLBLIP_00320;inference=ab initio prediction:Prodigal:2.6;locus_tag=GNDLBLIP_00320;product=hypothetical protein
33958	Prodigal:2.6	CDS	264522	264809	.	+	0	ID=GNDLBLIP_00321;inference=ab initio prediction:Prodigal:2.6;locus_tag=GNDLBLIP_00321;product=hypothetical protein
33958	Prodigal:2.6	CDS	264806	264955	.	+	0	ID=GNDLBLIP_00322;inference=ab initio prediction:Prodigal:2.6;locus_tag=GNDLBLIP_00322;product=hypothetical protein
33958	Prodigal:2.6	CDS	264960	265292	.	+	0	ID=GNDLBLIP_00323;inference=ab initio prediction:Prodigal:2.6;locus_tag=GNDLBLIP_00323;product=hypothetical protein
33958	Prodigal:2.6	CDS	265234	266223	.	+	0	ID=GNDLBLIP_00324;inference=ab initio prediction:Prodigal:2.6;locus_tag=GNDLBLIP_00324;product=hypothetical protein
33958	Prodigal:2.6	CDS	266240	266620	.	-	0	ID=GNDLBLIP_00325;inference=ab initio prediction:Prodigal:2.6;locus_tag=GNDLBLIP_00325;product=hypothetical protein
33958	Prodigal:2.6	CDS	266730	267005	.	+	0	ID=GNDLBLIP_00326;inference=ab initio prediction:Prodigal:2.6;locus_tag=GNDLBLIP_00326;product=hypothetical protein
33958	Prodigal:2.6	CDS	267014	267622	.	+	0	ID=GNDLBLIP_00327;eC_number=2.1.1.222;Name=ubiG_1;gene=ubiG_1;inference=ab initio prediction:Prodigal:2.6,protein motif:HAMAP:MF_00472;locus_tag=GNDLBLIP_00327;product=Ubiquinone biosynthesis O-methyltransferase
33958	Prodigal:2.6	CDS	267714	268061	.	-	0	ID=GNDLBLIP_00328;Name=hxlR_1;dbxref=COG:COG1733;gene=hxlR_1;inference=ab initio prediction:Prodigal:2.6,similar to AA sequence:UniProtKB:P42406;locus_tag=GNDLBLIP_00328;product=HTH-type transcriptional activator HxlR
33958	Prodigal:2.6	CDS	268148	268672	.	+	0	ID=GNDLBLIP_00329;eC_number=1.5.1.3;Name=folA;dbxref=COG:COG0262;gene=folA;inference=ab initio prediction:Prodigal:2.6,similar to AA sequence:UniProtKB:Q60034;locus_tag=GNDLBLIP_00329;product=Dihydrofolate reductase
33958	Prodigal:2.6	CDS	268811	269650	.	+	0	ID=GNDLBLIP_00330;inference=ab initio prediction:Prodigal:2.6;locus_tag=GNDLBLIP_00330;product=hypothetical protein
33958	Prodigal:2.6	CDS	269914	270261	.	+	0	ID=GNDLBLIP_00331;inference=ab initio prediction:Prodigal:2.6;locus_tag=GNDLBLIP_00331;product=hypothetical protein
33958	Prodigal:2.6	CDS	270282	271463	.	+	0	ID=GNDLBLIP_00332;eC_number=2.1.1.72;dbxref=COG:COG0286;inference=ab initio prediction:Prodigal:2.6,similar to AA sequence:UniProtKB:Q89Z59;locus_tag=GNDLBLIP_00332;product=putative type I restriction enzymeP M protein
33958	Prodigal:2.6	CDS	271511	271858	.	+	0	ID=GNDLBLIP_00333;inference=ab initio prediction:Prodigal:2.6;locus_tag=GNDLBLIP_00333;product=hypothetical protein
33958	Prodigal:2.6	CDS	271870	272538	.	+	0	ID=GNDLBLIP_00334;inference=ab initio prediction:Prodigal:2.6;locus_tag=GNDLBLIP_00334;product=hypothetical protein
33958	Prodigal:2.6	CDS	273267	273821	.	+	0	ID=GNDLBLIP_00335;inference=ab initio prediction:Prodigal:2.6;locus_tag=GNDLBLIP_00335;product=hypothetical protein
33958	Prodigal:2.6	CDS	273896	274624	.	-	0	ID=GNDLBLIP_00336;inference=ab initio prediction:Prodigal:2.6;locus_tag=GNDLBLIP_00336;product=hypothetical protein
33958	Prodigal:2.6	CDS	274639	275001	.	-	0	ID=GNDLBLIP_00337;inference=ab initio prediction:Prodigal:2.6;locus_tag=GNDLBLIP_00337;product=hypothetical protein
33958	Prodigal:2.6	CDS	275093	276019	.	+	0	ID=GNDLBLIP_00338;Name=Int-Tn;gene=Int-Tn;inference=ab initio prediction:Prodigal:2.6,similar to AA sequence:UniProtKB:P22886;locus_tag=GNDLBLIP_00338;product=Transposase from transposon Tn916
33958	Prodigal:2.6	CDS	276110	278989	.	+	0	ID=GNDLBLIP_00339;eC_number=3.1.21.3;Name=hsdR;gene=hsdR;inference=ab initio prediction:Prodigal:2.6,similar to AA sequence:UniProtKB:Q7A801;locus_tag=GNDLBLIP_00339;product=Type-1 restriction enzyme R protein
33958	Prodigal:2.6	CDS	279695	280588	.	-	0	ID=GNDLBLIP_00340;Name=btr_1;dbxref=COG:COG0614;gene=btr_1;inference=ab initio prediction:Prodigal:2.6,similar to AA sequence:UniProtKB:P40408;locus_tag=GNDLBLIP_00340;product=HTH-type transcriptional activator Btr
33958	Prodigal:2.6	CDS	281158	281373	.	+	0	ID=GNDLBLIP_00341;inference=ab initio prediction:Prodigal:2.6;locus_tag=GNDLBLIP_00341;product=hypothetical protein
33958	Prodigal:2.6	CDS	281404	283182	.	+	0	ID=GNDLBLIP_00342;inference=ab initio prediction:Prodigal:2.6;locus_tag=GNDLBLIP_00342;product=hypothetical protein
33958	Prodigal:2.6	CDS	283727	284221	.	+	0	ID=GNDLBLIP_00343;inference=ab initio prediction:Prodigal:2.6;locus_tag=GNDLBLIP_00343;product=hypothetical protein
33958	Prodigal:2.6	CDS	284383	284727	.	+	0	ID=GNDLBLIP_00344;inference=ab initio prediction:Prodigal:2.6;locus_tag=GNDLBLIP_00344;product=hypothetical protein
33958	Prodigal:2.6	CDS	284667	285305	.	+	0	ID=GNDLBLIP_00345;Name=rhaS_2;gene=rhaS_2;inference=ab initio prediction:Prodigal:2.6,protein motif:HAMAP:MF_01534;locus_tag=GNDLBLIP_00345;product=HTH-type transcriptional activator RhaS
33958	Prodigal:2.6	CDS	285473	285937	.	-	0	ID=GNDLBLIP_00346;eC_number=2.1.1.144;Name=tam_1;gene=tam_1;inference=ab initio prediction:Prodigal:2.6,protein motif:HAMAP:MF_00560;locus_tag=GNDLBLIP_00346;product=Trans-aconitate 2-methyltransferase
33958	Prodigal:2.6	CDS	285987	286460	.	-	0	ID=GNDLBLIP_00347;eC_number=2.1.1.63;Name=ogt_1;dbxref=COG:COG0350;gene=ogt_1;inference=ab initio prediction:Prodigal:2.6,similar to AA sequence:UniProtKB:P9WJW5;locus_tag=GNDLBLIP_00347;product=Methylated-DNA--protein-cysteine methyltransferase
33958	Prodigal:2.6	CDS	286457	287035	.	-	0	ID=GNDLBLIP_00348;Name=ada_1;dbxref=COG:COG0350;gene=ada_1;inference=ab initio prediction:Prodigal:2.6,similar to AA sequence:UniProtKB:P06134;locus_tag=GNDLBLIP_00348;product=Bifunctional transcriptional activator/DNA repair enzyme Ada
33958	Prodigal:2.6	CDS	287161	287730	.	-	0	ID=GNDLBLIP_00349;Name=yyaP_2;dbxref=COG:COG0262;gene=yyaP_2;inference=ab initio prediction:Prodigal:2.6,similar to AA sequence:UniProtKB:P37508;locus_tag=GNDLBLIP_00349;product=putative protein YyaP
33958	Prodigal:2.6	CDS	287843	288523	.	+	0	ID=GNDLBLIP_00350;Name=yxaF_1;gene=yxaF_1;inference=ab initio prediction:Prodigal:2.6,similar to AA sequence:UniProtKB:P42105;locus_tag=GNDLBLIP_00350;product=putative HTH-type transcriptional regulator YxaF
33958	Prodigal:2.6	CDS	288557	289207	.	+	0	ID=GNDLBLIP_00351;eC_number=2.3.1.9;Name=phaA_1;dbxref=COG:COG0183;gene=phaA_1;inference=ab initio prediction:Prodigal:2.6,similar to AA sequence:UniProtKB:P14611;locus_tag=GNDLBLIP_00351;product=Acetyl-CoA acetyltransferase
33958	Prodigal:2.6	CDS	289243	289740	.	+	0	ID=GNDLBLIP_00352;eC_number=2.3.1.9;Name=mmgA;dbxref=COG:COG0183;gene=mmgA;inference=ab initio prediction:Prodigal:2.6,similar to AA sequence:UniProtKB:P45855;locus_tag=GNDLBLIP_00352;product=Acetyl-CoA acetyltransferase
33958	Prodigal:2.6	CDS	289764	290165	.	+	0	ID=GNDLBLIP_00353;eC_number=1.8.1.4;Name=lpd_1;gene=lpd_1;inference=ab initio prediction:Prodigal:2.6,similar to AA sequence:UniProtKB:P14218;locus_tag=GNDLBLIP_00353;product=Dihydrolipoyl dehydrogenase
33958	Prodigal:2.6	CDS	290114	290665	.	+	0	ID=GNDLBLIP_00354;eC_number=1.8.1.4;Name=lpd3;dbxref=COG:COG1249;gene=lpd3;inference=ab initio prediction:Prodigal:2.6,similar to AA sequence:UniProtKB:P31046;locus_tag=GNDLBLIP_00354;product=Dihydrolipoyl dehydrogenase 3
33958	Prodigal:2.6	CDS	290714	291163	.	+	0	ID=GNDLBLIP_00355;eC_number=1.8.1.4;Name=lpdG;dbxref=COG:COG1249;gene=lpdG;inference=ab initio prediction:Prodigal:2.6,similar to AA sequence:UniProtKB:P31052;locus_tag=GNDLBLIP_00355;product=Dihydrolipoyl dehydrogenase
33958	Prodigal:2.6	CDS	291281	291754	.	+	0	ID=GNDLBLIP_00356;eC_number=3.1.2.-;dbxref=COG:COG2050;inference=ab initio prediction:Prodigal:2.6,similar to AA sequence:UniProtKB:P45083;locus_tag=GNDLBLIP_00356;product=Putative esterase
33958	Prodigal:2.6	CDS	291938	293125	.	-	0	ID=GNDLBLIP_00357;eC_number=2.3.1.16;Name=fadI;dbxref=COG:COG0183;gene=fadI;inference=ab initio prediction:Prodigal:2.6,similar to AA sequence:UniProtKB:P76503;locus_tag=GNDLBLIP_00357;product=3-ketoacyl-CoA thiolase FadI
33958	Prodigal:2.6	CDS	293194	293619	.	-	0	ID=GNDLBLIP_00358;inference=ab initio prediction:Prodigal:2.6;locus_tag=GNDLBLIP_00358;product=hypothetical protein
33958	Prodigal:2.6	CDS	293640	294218	.	-	0	ID=GNDLBLIP_00359;eC_number=3.6.1.-;Name=nudK;gene=nudK;inference=ab initio prediction:Prodigal:2.6,similar to AA sequence:UniProtKB:P37128;locus_tag=GNDLBLIP_00359;product=GDP-mannose pyrophosphatase NudK
33958	Prodigal:2.6	CDS	294444	294995	.	-	0	ID=GNDLBLIP_00360;eC_number=3.1.3.104;Name=ycsE;gene=ycsE;inference=ab initio prediction:Prodigal:2.6,similar to AA sequence:UniProtKB:P42962;locus_tag=GNDLBLIP_00360;product=5-amino-6-(5-phospho-D-ribitylamino)uracil phosphatase YcsE
33958	Prodigal:2.6	CDS	295393	296139	.	-	0	ID=GNDLBLIP_00361;inference=ab initio prediction:Prodigal:2.6;locus_tag=GNDLBLIP_00361;product=hypothetical protein
33958	Prodigal:2.6	CDS	296334	297167	.	-	0	ID=GNDLBLIP_00362;inference=ab initio prediction:Prodigal:2.6;locus_tag=GNDLBLIP_00362;product=hypothetical protein
33958	Prodigal:2.6	CDS	297557	297736	.	+	0	ID=GNDLBLIP_00363;inference=ab initio prediction:Prodigal:2.6;locus_tag=GNDLBLIP_00363;product=hypothetical protein
33958	Prodigal:2.6	CDS	297943	298353	.	+	0	ID=GNDLBLIP_00364;inference=ab initio prediction:Prodigal:2.6;locus_tag=GNDLBLIP_00364;product=hypothetical protein
33958	Prodigal:2.6	CDS	298665	299087	.	+	0	ID=GNDLBLIP_00365;inference=ab initio prediction:Prodigal:2.6;locus_tag=GNDLBLIP_00365;product=hypothetical protein
33958	Prodigal:2.6	CDS	299087	299581	.	+	0	ID=GNDLBLIP_00366;eC_number=2.7.13.3;Name=comP_1;gene=comP_1;inference=ab initio prediction:Prodigal:2.6,similar to AA sequence:UniProtKB:Q99027;locus_tag=GNDLBLIP_00366;product=Sensor histidine kinase ComP
33958	Prodigal:2.6	CDS	299597	300262	.	+	0	ID=GNDLBLIP_00367;Name=rcsB_1;gene=rcsB_1;inference=ab initio prediction:Prodigal:2.6,protein motif:HAMAP:MF_00981;locus_tag=GNDLBLIP_00367;product=Transcriptional regulatory protein RcsB
33958	Prodigal:2.6	CDS	300501	300833	.	+	0	ID=GNDLBLIP_00368;inference=ab initio prediction:Prodigal:2.6,similar to AA sequence:UniProtKB:P76402;locus_tag=GNDLBLIP_00368;note=UPF0339 protein YegP;product=hypothetical protein
33958	Prodigal:2.6	CDS	300842	301912	.	+	0	ID=GNDLBLIP_00369;inference=ab initio prediction:Prodigal:2.6;locus_tag=GNDLBLIP_00369;product=hypothetical protein
33958	Prodigal:2.6	CDS	301909	302439	.	+	0	ID=GNDLBLIP_00370;inference=ab initio prediction:Prodigal:2.6;locus_tag=GNDLBLIP_00370;product=hypothetical protein
33958	Prodigal:2.6	CDS	302440	302823	.	+	0	ID=GNDLBLIP_00371;inference=ab initio prediction:Prodigal:2.6;locus_tag=GNDLBLIP_00371;product=hypothetical protein
33958	Prodigal:2.6	CDS	302826	303230	.	+	0	ID=GNDLBLIP_00372;inference=ab initio prediction:Prodigal:2.6;locus_tag=GNDLBLIP_00372;product=hypothetical protein
33958	Prodigal:2.6	CDS	303237	304199	.	+	0	ID=GNDLBLIP_00373;inference=ab initio prediction:Prodigal:2.6;locus_tag=GNDLBLIP_00373;product=hypothetical protein
33958	Prodigal:2.6	CDS	304174	304572	.	+	0	ID=GNDLBLIP_00374;inference=ab initio prediction:Prodigal:2.6;locus_tag=GNDLBLIP_00374;product=hypothetical protein
33958	Prodigal:2.6	CDS	304584	305486	.	+	0	ID=GNDLBLIP_00375;inference=ab initio prediction:Prodigal:2.6;locus_tag=GNDLBLIP_00375;product=hypothetical protein
33958	Prodigal:2.6	CDS	306244	306906	.	+	0	ID=GNDLBLIP_00376;inference=ab initio prediction:Prodigal:2.6;locus_tag=GNDLBLIP_00376;product=hypothetical protein
33958	Prodigal:2.6	CDS	306927	307529	.	+	0	ID=GNDLBLIP_00377;inference=ab initio prediction:Prodigal:2.6;locus_tag=GNDLBLIP_00377;product=hypothetical protein
33958	Prodigal:2.6	CDS	307596	309083	.	-	0	ID=GNDLBLIP_00378;inference=ab initio prediction:Prodigal:2.6;locus_tag=GNDLBLIP_00378;product=hypothetical protein
33958	Prodigal:2.6	CDS	309098	309466	.	-	0	ID=GNDLBLIP_00379;inference=ab initio prediction:Prodigal:2.6;locus_tag=GNDLBLIP_00379;product=hypothetical protein
33958	Prodigal:2.6	CDS	309481	310758	.	-	0	ID=GNDLBLIP_00380;inference=ab initio prediction:Prodigal:2.6;locus_tag=GNDLBLIP_00380;product=hypothetical protein
33958	Prodigal:2.6	CDS	310761	311186	.	-	0	ID=GNDLBLIP_00381;eC_number=3.6.3.-;Name=ecfA2;dbxref=COG:COG1122;gene=ecfA2;inference=ab initio prediction:Prodigal:2.6,similar to AA sequence:UniProtKB:Q03PY6;locus_tag=GNDLBLIP_00381;product=Energy-coupling factor transporter ATP-binding protein EcfA2
33958	Prodigal:2.6	CDS	311152	311664	.	-	0	ID=GNDLBLIP_00382;eC_number=3.6.3.-;Name=lptB_1;dbxref=COG:COG1137;gene=lptB_1;inference=ab initio prediction:Prodigal:2.6,similar to AA sequence:UniProtKB:P45073;locus_tag=GNDLBLIP_00382;product=Lipopolysaccharide export system ATP-binding protein LptB
33958	Prodigal:2.6	CDS	311704	311910	.	-	0	ID=GNDLBLIP_00383;inference=ab initio prediction:Prodigal:2.6;locus_tag=GNDLBLIP_00383;product=hypothetical protein
33958	Prodigal:2.6	CDS	311898	312428	.	-	0	ID=GNDLBLIP_00384;inference=ab initio prediction:Prodigal:2.6;locus_tag=GNDLBLIP_00384;product=hypothetical protein
33958	Prodigal:2.6	CDS	312654	312941	.	+	0	ID=GNDLBLIP_00385;inference=ab initio prediction:Prodigal:2.6;locus_tag=GNDLBLIP_00385;product=hypothetical protein
33958	Prodigal:2.6	CDS	313055	313327	.	+	0	ID=GNDLBLIP_00386;eC_number=1.3.99.-;Name=mmgC_1;dbxref=COG:COG1960;gene=mmgC_1;inference=ab initio prediction:Prodigal:2.6,similar to AA sequence:UniProtKB:P45857;locus_tag=GNDLBLIP_00386;product=Acyl-CoA dehydrogenase
33958	Prodigal:2.6	CDS	313314	314051	.	+	0	ID=GNDLBLIP_00387;eC_number=1.3.1.108;Name=carC;dbxref=COG:COG1960;gene=carC;inference=ab initio prediction:Prodigal:2.6,similar to AA sequence:UniProtKB:H6LGM6;locus_tag=GNDLBLIP_00387;product=Caffeyl-CoA reductase-Etf complex subunit CarC
33958	Prodigal:2.6	CDS	314092	314436	.	+	0	ID=GNDLBLIP_00388;inference=ab initio prediction:Prodigal:2.6;locus_tag=GNDLBLIP_00388;product=hypothetical protein
33958	Prodigal:2.6	CDS	314519	315028	.	-	0	ID=GNDLBLIP_00389;inference=ab initio prediction:Prodigal:2.6;locus_tag=GNDLBLIP_00389;product=hypothetical protein
33958	Prodigal:2.6	CDS	315100	315369	.	-	0	ID=GNDLBLIP_00390;inference=ab initio prediction:Prodigal:2.6;locus_tag=GNDLBLIP_00390;product=hypothetical protein
33958	Prodigal:2.6	CDS	315438	315575	.	-	0	ID=GNDLBLIP_00391;inference=ab initio prediction:Prodigal:2.6;locus_tag=GNDLBLIP_00391;product=hypothetical protein
33958	Prodigal:2.6	CDS	315596	316882	.	-	0	ID=GNDLBLIP_00392;inference=ab initio prediction:Prodigal:2.6;locus_tag=GNDLBLIP_00392;product=hypothetical protein
33958	Prodigal:2.6	CDS	317280	318026	.	-	0	ID=GNDLBLIP_00393;inference=ab initio prediction:Prodigal:2.6;locus_tag=GNDLBLIP_00393;product=hypothetical protein
33958	Prodigal:2.6	CDS	318135	319517	.	-	0	ID=GNDLBLIP_00394;eC_number=6.5.1.-;Name=rtcB_1;dbxref=COG:COG1690;gene=rtcB_1;inference=ab initio prediction:Prodigal:2.6,similar to AA sequence:UniProtKB:P9WGW5;locus_tag=GNDLBLIP_00394;product=RNA-splicing ligase RtcB
33958	Prodigal:2.6	CDS	319612	319944	.	+	0	ID=GNDLBLIP_00395;inference=ab initio prediction:Prodigal:2.6;locus_tag=GNDLBLIP_00395;product=hypothetical protein
33958	Prodigal:2.6	CDS	320188	321210	.	+	0	ID=GNDLBLIP_00396;inference=ab initio prediction:Prodigal:2.6;locus_tag=GNDLBLIP_00396;product=hypothetical protein
33958	Prodigal:2.6	CDS	321417	322184	.	-	0	ID=GNDLBLIP_00397;inference=ab initio prediction:Prodigal:2.6;locus_tag=GNDLBLIP_00397;product=hypothetical protein
33958	Prodigal:2.6	CDS	322383	323483	.	+	0	ID=GNDLBLIP_00398;inference=ab initio prediction:Prodigal:2.6;locus_tag=GNDLBLIP_00398;product=hypothetical protein
33958	Prodigal:2.6	CDS	323576	325129	.	+	0	ID=GNDLBLIP_00399;inference=ab initio prediction:Prodigal:2.6;locus_tag=GNDLBLIP_00399;product=hypothetical protein
33958	Prodigal:2.6	CDS	325153	326496	.	+	0	ID=GNDLBLIP_00400;inference=ab initio prediction:Prodigal:2.6;locus_tag=GNDLBLIP_00400;product=hypothetical protein
33958	Prodigal:2.6	CDS	326486	328078	.	+	0	ID=GNDLBLIP_00401;inference=ab initio prediction:Prodigal:2.6;locus_tag=GNDLBLIP_00401;product=hypothetical protein
33958	Prodigal:2.6	CDS	328082	329221	.	+	0	ID=GNDLBLIP_00402;eC_number=1.11.1.5;Name=ccp_1;dbxref=COG:COG1858;gene=ccp_1;inference=ab initio prediction:Prodigal:2.6,similar to AA sequence:UniProtKB:P55929;locus_tag=GNDLBLIP_00402;product=Cytochrome c551 peroxidase
33958	Prodigal:2.6	CDS	329244	329726	.	+	0	ID=GNDLBLIP_00403;inference=ab initio prediction:Prodigal:2.6;locus_tag=GNDLBLIP_00403;product=hypothetical protein
33958	Prodigal:2.6	CDS	329785	329952	.	-	0	ID=GNDLBLIP_00404;inference=ab initio prediction:Prodigal:2.6;locus_tag=GNDLBLIP_00404;product=hypothetical protein
33958	Prodigal:2.6	CDS	329987	330712	.	+	0	ID=GNDLBLIP_00405;inference=ab initio prediction:Prodigal:2.6;locus_tag=GNDLBLIP_00405;product=hypothetical protein
33958	Prodigal:2.6	CDS	330757	331092	.	-	0	ID=GNDLBLIP_00406;inference=ab initio prediction:Prodigal:2.6;locus_tag=GNDLBLIP_00406;product=hypothetical protein
33958	Prodigal:2.6	CDS	331085	331375	.	-	0	ID=GNDLBLIP_00407;inference=ab initio prediction:Prodigal:2.6;locus_tag=GNDLBLIP_00407;product=hypothetical protein
33958	Prodigal:2.6	CDS	331416	331661	.	-	0	ID=GNDLBLIP_00408;inference=ab initio prediction:Prodigal:2.6;locus_tag=GNDLBLIP_00408;product=hypothetical protein
33958	Prodigal:2.6	CDS	331765	332043	.	+	0	ID=GNDLBLIP_00409;inference=ab initio prediction:Prodigal:2.6;locus_tag=GNDLBLIP_00409;product=hypothetical protein
33958	Prodigal:2.6	CDS	332193	333797	.	+	0	ID=GNDLBLIP_00410;Name=clcA_1;dbxref=COG:COG0038;gene=clcA_1;inference=ab initio prediction:Prodigal:2.6,similar to AA sequence:UniProtKB:Q8ZRP8;locus_tag=GNDLBLIP_00410;product=H(+)/Cl(-) exchange transporter ClcA
33958	Prodigal:2.6	CDS	333806	333928	.	+	0	ID=GNDLBLIP_00411;inference=ab initio prediction:Prodigal:2.6;locus_tag=GNDLBLIP_00411;product=hypothetical protein
33958	Prodigal:2.6	CDS	333938	334561	.	+	0	ID=GNDLBLIP_00412;Name=vfr;dbxref=COG:COG0664;gene=vfr;inference=ab initio prediction:Prodigal:2.6,similar to AA sequence:UniProtKB:P55222;locus_tag=GNDLBLIP_00412;product=Cyclic AMP receptor-like protein
33958	Prodigal:2.6	CDS	334623	335339	.	+	0	ID=GNDLBLIP_00413;inference=ab initio prediction:Prodigal:2.6;locus_tag=GNDLBLIP_00413;product=hypothetical protein
33958	Prodigal:2.6	CDS	335473	335967	.	+	0	ID=GNDLBLIP_00414;eC_number=3.-.-.-;Name=baeB;dbxref=COG:COG0491;gene=baeB;inference=ab initio prediction:Prodigal:2.6,similar to AA sequence:UniProtKB:A7Z4X7;locus_tag=GNDLBLIP_00414;product=putative polyketide biosynthesis zinc-dependent hydrolase BaeB
33958	Prodigal:2.6	CDS	335979	336881	.	+	0	ID=GNDLBLIP_00415;eC_number=2.8.1.-;dbxref=COG:COG0607;inference=ab initio prediction:Prodigal:2.6,similar to AA sequence:UniProtKB:D3RPB9;locus_tag=GNDLBLIP_00415;product=Sulfurtransferase
33958	Prodigal:2.6	CDS	336900	337463	.	+	0	ID=GNDLBLIP_00416;inference=ab initio prediction:Prodigal:2.6,similar to AA sequence:UniProtKB:Q9PFB2;locus_tag=GNDLBLIP_00416;note=UPF0394 membrane protein XF_0766;product=hypothetical protein
33958	Prodigal:2.6	CDS	337474	337920	.	+	0	ID=GNDLBLIP_00417;inference=ab initio prediction:Prodigal:2.6,similar to AA sequence:UniProtKB:Q9PFB3;locus_tag=GNDLBLIP_00417;note=UPF0394 membrane protein XF_0765;product=hypothetical protein
33958	Prodigal:2.6	CDS	338002	338334	.	-	0	ID=GNDLBLIP_00418;inference=ab initio prediction:Prodigal:2.6,similar to AA sequence:UniProtKB:P76402;locus_tag=GNDLBLIP_00418;note=UPF0339 protein YegP;product=hypothetical protein
33958	Prodigal:2.6	CDS	338552	340081	.	+	0	ID=GNDLBLIP_00419;Name=bicA_1;dbxref=COG:COG0659;gene=bicA_1;inference=ab initio prediction:Prodigal:2.6,similar to AA sequence:UniProtKB:Q14SY0;locus_tag=GNDLBLIP_00419;product=Bicarbonate transporter BicA
33958	Prodigal:2.6	CDS	340366	341550	.	-	0	ID=GNDLBLIP_00420;inference=ab initio prediction:Prodigal:2.6;locus_tag=GNDLBLIP_00420;product=hypothetical protein
33958	Prodigal:2.6	CDS	341621	342556	.	-	0	ID=GNDLBLIP_00421;inference=ab initio prediction:Prodigal:2.6;locus_tag=GNDLBLIP_00421;product=hypothetical protein
33958	Prodigal:2.6	CDS	342585	343715	.	-	0	ID=GNDLBLIP_00422;inference=ab initio prediction:Prodigal:2.6;locus_tag=GNDLBLIP_00422;product=hypothetical protein
33958	Prodigal:2.6	CDS	343834	344187	.	-	0	ID=GNDLBLIP_00423;inference=ab initio prediction:Prodigal:2.6;locus_tag=GNDLBLIP_00423;product=hypothetical protein
33958	Prodigal:2.6	CDS	344172	345725	.	-	0	ID=GNDLBLIP_00424;Name=btuB_3;gene=btuB_3;inference=ab initio prediction:Prodigal:2.6,protein motif:HAMAP:MF_01531;locus_tag=GNDLBLIP_00424;product=Vitamin B12 transporter BtuB
33958	Prodigal:2.6	CDS	346317	346769	.	-	0	ID=GNDLBLIP_00425;Name=rhaS_3;gene=rhaS_3;inference=ab initio prediction:Prodigal:2.6,similar to AA sequence:UniProtKB:P09377;locus_tag=GNDLBLIP_00425;product=HTH-type transcriptional activator RhaS
33958	Prodigal:2.6	CDS	346802	347101	.	-	0	ID=GNDLBLIP_00426;inference=ab initio prediction:Prodigal:2.6;locus_tag=GNDLBLIP_00426;product=hypothetical protein
33958	Prodigal:2.6	CDS	347176	348378	.	+	0	ID=GNDLBLIP_00427;Name=yycB;dbxref=COG:COG2807;gene=yycB;inference=ab initio prediction:Prodigal:2.6,similar to AA sequence:UniProtKB:P37482;locus_tag=GNDLBLIP_00427;product=putative transporter YycB
33958	Prodigal:2.6	CDS	348405	349544	.	-	0	ID=GNDLBLIP_00428;Name=flp_3;gene=flp_3;inference=ab initio prediction:Prodigal:2.6,similar to AA sequence:UniProtKB:Q7A3Q5;locus_tag=GNDLBLIP_00428;product=Protein flp
33958	Prodigal:2.6	CDS	349699	350394	.	-	0	ID=GNDLBLIP_00429;eC_number=3.1.1.88;Name=pytH;gene=pytH;inference=ab initio prediction:Prodigal:2.6,similar to AA sequence:UniProtKB:C0LA90;locus_tag=GNDLBLIP_00429;product=Pyrethroid hydrolase
33958	Prodigal:2.6	CDS	350457	351041	.	-	0	ID=GNDLBLIP_00430;inference=ab initio prediction:Prodigal:2.6;locus_tag=GNDLBLIP_00430;product=hypothetical protein
33958	Prodigal:2.6	CDS	351071	351889	.	-	0	ID=GNDLBLIP_00431;eC_number=3.4.16.4;inference=ab initio prediction:Prodigal:2.6,similar to AA sequence:UniProtKB:P15555;locus_tag=GNDLBLIP_00431;product=D-alanyl-D-alanine carboxypeptidase
33958	Prodigal:2.6	CDS	351892	352152	.	-	0	ID=GNDLBLIP_00432;inference=ab initio prediction:Prodigal:2.6;locus_tag=GNDLBLIP_00432;product=hypothetical protein
33958	Prodigal:2.6	CDS	352167	352535	.	-	0	ID=GNDLBLIP_00433;inference=ab initio prediction:Prodigal:2.6;locus_tag=GNDLBLIP_00433;product=hypothetical protein
33958	Prodigal:2.6	CDS	352538	352804	.	-	0	ID=GNDLBLIP_00434;inference=ab initio prediction:Prodigal:2.6;locus_tag=GNDLBLIP_00434;product=hypothetical protein
33958	Prodigal:2.6	CDS	352939	353712	.	-	0	ID=GNDLBLIP_00435;eC_number=3.-.-.-;inference=ab initio prediction:Prodigal:2.6,similar to AA sequence:UniProtKB:P9WLD7;locus_tag=GNDLBLIP_00435;product=putative metallo-hydrolase
33958	Prodigal:2.6	CDS	353908	354225	.	+	0	ID=GNDLBLIP_00436;inference=ab initio prediction:Prodigal:2.6;locus_tag=GNDLBLIP_00436;product=hypothetical protein
33958	Prodigal:2.6	CDS	354306	355172	.	+	0	ID=GNDLBLIP_00437;Name=clcA_2;dbxref=COG:COG0038;gene=clcA_2;inference=ab initio prediction:Prodigal:2.6,similar to AA sequence:UniProtKB:Q8ZRP8;locus_tag=GNDLBLIP_00437;product=H(+)/Cl(-) exchange transporter ClcA
33958	Prodigal:2.6	CDS	355408	356046	.	-	0	ID=GNDLBLIP_00438;inference=ab initio prediction:Prodigal:2.6;locus_tag=GNDLBLIP_00438;product=hypothetical protein
33958	Prodigal:2.6	CDS	356051	356293	.	-	0	ID=GNDLBLIP_00439;inference=ab initio prediction:Prodigal:2.6;locus_tag=GNDLBLIP_00439;product=hypothetical protein
33958	Prodigal:2.6	CDS	356480	357970	.	-	0	ID=GNDLBLIP_00440;Name=gabR_1;dbxref=COG:COG1167;gene=gabR_1;inference=ab initio prediction:Prodigal:2.6,similar to AA sequence:UniProtKB:P94426;locus_tag=GNDLBLIP_00440;product=HTH-type transcriptional regulatory protein GabR
33958	Prodigal:2.6	CDS	358032	358661	.	+	0	ID=GNDLBLIP_00441;inference=ab initio prediction:Prodigal:2.6;locus_tag=GNDLBLIP_00441;product=hypothetical protein
33958	Prodigal:2.6	CDS	358609	359742	.	+	0	ID=GNDLBLIP_00442;eC_number=2.3.1.47;Name=bioF;gene=bioF;inference=ab initio prediction:Prodigal:2.6,similar to AA sequence:UniProtKB:P22806;locus_tag=GNDLBLIP_00442;product=8-amino-7-oxononanoate synthase
33958	Prodigal:2.6	CDS	359958	360578	.	+	0	ID=GNDLBLIP_00443;eC_number=6.3.3.3;Name=bioD1;dbxref=COG:COG0132;gene=bioD1;inference=ab initio prediction:Prodigal:2.6,similar to AA sequence:UniProtKB:P13000;locus_tag=GNDLBLIP_00443;product=ATP-dependent dethiobiotin synthetase BioD 1
33958	Prodigal:2.6	CDS	360636	361631	.	+	0	ID=GNDLBLIP_00444;eC_number=2.8.1.6;Name=bioB;dbxref=COG:COG0502;gene=bioB;inference=ab initio prediction:Prodigal:2.6,similar to AA sequence:UniProtKB:P12996;locus_tag=GNDLBLIP_00444;product=Biotin synthase
33958	Prodigal:2.6	CDS	361616	362134	.	+	0	ID=GNDLBLIP_00445;eC_number=2.6.1.62;Name=bioA_1;gene=bioA_1;inference=ab initio prediction:Prodigal:2.6,similar to AA sequence:UniProtKB:P22805;locus_tag=GNDLBLIP_00445;product=Adenosylmethionine-8-amino-7-oxononanoate aminotransferase
33958	Prodigal:2.6	CDS	362242	362883	.	+	0	ID=GNDLBLIP_00446;eC_number=2.6.1.62;Name=bioA_2;gene=bioA_2;inference=ab initio prediction:Prodigal:2.6,similar to AA sequence:UniProtKB:P0A4X7;locus_tag=GNDLBLIP_00446;product=Adenosylmethionine-8-amino-7-oxononanoate aminotransferase
33958	Prodigal:2.6	CDS	363059	363565	.	+	0	ID=GNDLBLIP_00447;inference=ab initio prediction:Prodigal:2.6;locus_tag=GNDLBLIP_00447;product=hypothetical protein
33958	Prodigal:2.6	CDS	363571	363831	.	+	0	ID=GNDLBLIP_00448;eC_number=5.4.2.7;Name=deoB;gene=deoB;inference=ab initio prediction:Prodigal:2.6,protein motif:HAMAP:MF_00740;locus_tag=GNDLBLIP_00448;product=Phosphopentomutase
33958	Prodigal:2.6	CDS	364070	364501	.	+	0	ID=GNDLBLIP_00449;dbxref=COG:COG1959;inference=ab initio prediction:Prodigal:2.6,similar to AA sequence:UniProtKB:P9WME3;locus_tag=GNDLBLIP_00449;product=Putative HTH-type transcriptional regulator
33958	Prodigal:2.6	CDS	364549	364995	.	+	0	ID=GNDLBLIP_00450;inference=ab initio prediction:Prodigal:2.6;locus_tag=GNDLBLIP_00450;product=hypothetical protein
33958	Prodigal:2.6	CDS	364992	365768	.	+	0	ID=GNDLBLIP_00451;inference=ab initio prediction:Prodigal:2.6;locus_tag=GNDLBLIP_00451;product=hypothetical protein
33958	Prodigal:2.6	CDS	365792	365986	.	+	0	ID=GNDLBLIP_00452;inference=ab initio prediction:Prodigal:2.6;locus_tag=GNDLBLIP_00452;product=hypothetical protein
33958	Prodigal:2.6	CDS	365989	366825	.	+	0	ID=GNDLBLIP_00453;eC_number=1.7.2.1;Name=aniA;dbxref=COG:COG2132;gene=aniA;inference=ab initio prediction:Prodigal:2.6,similar to AA sequence:UniProtKB:Q02219;locus_tag=GNDLBLIP_00453;product=Copper-containing nitrite reductase
33958	Prodigal:2.6	CDS	366960	367688	.	+	0	ID=GNDLBLIP_00454;eC_number=2.7.11.1;Name=pkn1_2;dbxref=COG:COG0515;gene=pkn1_2;inference=ab initio prediction:Prodigal:2.6,similar to AA sequence:UniProtKB:O84147;locus_tag=GNDLBLIP_00454;product=Serine/threonine-protein kinase pkn1
33958	Prodigal:2.6	CDS	367703	368269	.	+	0	ID=GNDLBLIP_00455;Name=ypmQ_1;dbxref=COG:COG1999;gene=ypmQ_1;inference=ab initio prediction:Prodigal:2.6,similar to AA sequence:UniProtKB:P54178;locus_tag=GNDLBLIP_00455;product=SCO1 protein
33958	Prodigal:2.6	CDS	368396	368698	.	+	0	ID=GNDLBLIP_00456;Name=cyt;dbxref=COG:COG4654;gene=cyt;inference=ab initio prediction:Prodigal:2.6,similar to AA sequence:UniProtKB:P95339;locus_tag=GNDLBLIP_00456;product=Cytochrome c-552
33958	Prodigal:2.6	CDS	368783	369502	.	+	0	ID=GNDLBLIP_00457;Name=scdA;dbxref=COG:COG2846;gene=scdA;inference=ab initio prediction:Prodigal:2.6,similar to AA sequence:UniProtKB:P72360;locus_tag=GNDLBLIP_00457;product=Iron-sulfur cluster repair protein ScdA
33958	Prodigal:2.6	CDS	369523	371178	.	+	0	ID=GNDLBLIP_00458;eC_number=1.7.2.5;Name=norB_1;dbxref=COG:COG3256;gene=norB_1;inference=ab initio prediction:Prodigal:2.6,similar to AA sequence:UniProtKB:Q59647;locus_tag=GNDLBLIP_00458;product=Nitric oxide reductase subunit B
33958	Prodigal:2.6	CDS	371183	371767	.	+	0	ID=GNDLBLIP_00459;eC_number=1.7.2.5;Name=norB_2;gene=norB_2;inference=ab initio prediction:Prodigal:2.6,similar to AA sequence:UniProtKB:P98008;locus_tag=GNDLBLIP_00459;product=Nitric oxide reductase subunit B
33958	Prodigal:2.6	CDS	371828	372280	.	+	0	ID=GNDLBLIP_00460;inference=ab initio prediction:Prodigal:2.6;locus_tag=GNDLBLIP_00460;product=hypothetical protein
33958	Prodigal:2.6	CDS	372340	372801	.	-	0	ID=GNDLBLIP_00461;eC_number=3.5.1.-;Name=rutD_1;gene=rutD_1;inference=ab initio prediction:Prodigal:2.6,protein motif:HAMAP:MF_00832;locus_tag=GNDLBLIP_00461;product=Putative aminoacrylate hydrolase RutD
33958	Prodigal:2.6	CDS	372882	373985	.	-	0	ID=GNDLBLIP_00462;inference=ab initio prediction:Prodigal:2.6;locus_tag=GNDLBLIP_00462;product=hypothetical protein
33958	Prodigal:2.6	CDS	374156	375607	.	-	0	ID=GNDLBLIP_00463;Name=srpC_1;gene=srpC_1;inference=ab initio prediction:Prodigal:2.6,similar to AA sequence:UniProtKB:O31101;locus_tag=GNDLBLIP_00463;product=Solvent efflux pump outer membrane protein SrpC
33958	Prodigal:2.6	CDS	375623	378709	.	-	0	ID=GNDLBLIP_00464;Name=bepE_2;gene=bepE_2;inference=ab initio prediction:Prodigal:2.6,similar to AA sequence:UniProtKB:Q8G2M6;locus_tag=GNDLBLIP_00464;product=Efflux pump membrane transporter BepE
33958	Prodigal:2.6	CDS	378742	379626	.	-	0	ID=GNDLBLIP_00465;Name=acrE;gene=acrE;inference=ab initio prediction:Prodigal:2.6,similar to AA sequence:UniProtKB:P24180;locus_tag=GNDLBLIP_00465;product=Multidrug export protein AcrE
33958	Prodigal:2.6	CDS	379653	379829	.	-	0	ID=GNDLBLIP_00466;inference=ab initio prediction:Prodigal:2.6;locus_tag=GNDLBLIP_00466;product=hypothetical protein
33958	Prodigal:2.6	CDS	379888	380217	.	-	0	ID=GNDLBLIP_00467;inference=ab initio prediction:Prodigal:2.6;locus_tag=GNDLBLIP_00467;product=hypothetical protein
33958	Prodigal:2.6	CDS	380594	381370	.	-	0	ID=GNDLBLIP_00468;Name=ydjF;dbxref=COG:COG1349;gene=ydjF;inference=ab initio prediction:Prodigal:2.6,similar to AA sequence:UniProtKB:P77721;locus_tag=GNDLBLIP_00468;product=putative HTH-type transcriptional regulator YdjF
33958	Prodigal:2.6	CDS	381560	381685	.	+	0	ID=GNDLBLIP_00469;inference=ab initio prediction:Prodigal:2.6;locus_tag=GNDLBLIP_00469;product=hypothetical protein
33958	Prodigal:2.6	CDS	381854	384055	.	+	0	ID=GNDLBLIP_00470;eC_number=3.4.22.-;Name=lagD_1;gene=lagD_1;inference=ab initio prediction:Prodigal:2.6,similar to AA sequence:UniProtKB:P59852;locus_tag=GNDLBLIP_00470;product=Lactococcin-G-processing and transport ATP-binding protein LagD
33958	Prodigal:2.6	CDS	384130	384303	.	+	0	ID=GNDLBLIP_00471;inference=ab initio prediction:Prodigal:2.6;locus_tag=GNDLBLIP_00471;product=hypothetical protein
33958	Prodigal:2.6	CDS	384550	384753	.	+	0	ID=GNDLBLIP_00472;inference=ab initio prediction:Prodigal:2.6;locus_tag=GNDLBLIP_00472;product=hypothetical protein
33958	Prodigal:2.6	CDS	384787	384984	.	+	0	ID=GNDLBLIP_00473;inference=ab initio prediction:Prodigal:2.6;locus_tag=GNDLBLIP_00473;product=hypothetical protein
33958	Prodigal:2.6	CDS	385019	385195	.	+	0	ID=GNDLBLIP_00474;inference=ab initio prediction:Prodigal:2.6;locus_tag=GNDLBLIP_00474;product=hypothetical protein
33958	Prodigal:2.6	CDS	385515	385769	.	+	0	ID=GNDLBLIP_00475;inference=ab initio prediction:Prodigal:2.6;locus_tag=GNDLBLIP_00475;product=hypothetical protein
33958	Prodigal:2.6	CDS	385781	386818	.	+	0	ID=GNDLBLIP_00476;inference=ab initio prediction:Prodigal:2.6;locus_tag=GNDLBLIP_00476;product=hypothetical protein
33958	Prodigal:2.6	CDS	386880	387176	.	+	0	ID=GNDLBLIP_00477;inference=ab initio prediction:Prodigal:2.6;locus_tag=GNDLBLIP_00477;product=hypothetical protein
33958	Prodigal:2.6	CDS	387203	388393	.	+	0	ID=GNDLBLIP_00478;inference=ab initio prediction:Prodigal:2.6;locus_tag=GNDLBLIP_00478;product=hypothetical protein
33958	Prodigal:2.6	CDS	388594	390126	.	+	0	ID=GNDLBLIP_00479;eC_number=3.5.1.18;Name=dapE_1;dbxref=COG:COG0624;gene=dapE_1;inference=ab initio prediction:Prodigal:2.6,similar to AA sequence:UniProtKB:P44514;locus_tag=GNDLBLIP_00479;product=Succinyl-diaminopimelate desuccinylase
33958	Prodigal:2.6	CDS	390263	390658	.	+	0	ID=GNDLBLIP_00480;inference=ab initio prediction:Prodigal:2.6;locus_tag=GNDLBLIP_00480;product=hypothetical protein
33958	Prodigal:2.6	CDS	390689	391720	.	-	0	ID=GNDLBLIP_00481;dbxref=COG:COG1680;inference=ab initio prediction:Prodigal:2.6,similar to AA sequence:UniProtKB:P9WLZ3;locus_tag=GNDLBLIP_00481;product=putative protein
33958	Prodigal:2.6	CDS	391790	392620	.	-	0	ID=GNDLBLIP_00482;inference=ab initio prediction:Prodigal:2.6;locus_tag=GNDLBLIP_00482;product=hypothetical protein
33958	Prodigal:2.6	CDS	392745	393128	.	-	0	ID=GNDLBLIP_00483;inference=ab initio prediction:Prodigal:2.6;locus_tag=GNDLBLIP_00483;product=hypothetical protein
33958	Prodigal:2.6	CDS	393134	393331	.	-	0	ID=GNDLBLIP_00484;inference=ab initio prediction:Prodigal:2.6;locus_tag=GNDLBLIP_00484;product=hypothetical protein
33958	Prodigal:2.6	CDS	393336	393869	.	-	0	ID=GNDLBLIP_00485;inference=ab initio prediction:Prodigal:2.6;locus_tag=GNDLBLIP_00485;product=hypothetical protein
33958	Prodigal:2.6	CDS	393940	394584	.	-	0	ID=GNDLBLIP_00486;inference=ab initio prediction:Prodigal:2.6;locus_tag=GNDLBLIP_00486;product=hypothetical protein
33958	Prodigal:2.6	CDS	394680	395051	.	-	0	ID=GNDLBLIP_00487;inference=ab initio prediction:Prodigal:2.6;locus_tag=GNDLBLIP_00487;product=hypothetical protein
33958	Prodigal:2.6	CDS	395366	395638	.	-	0	ID=GNDLBLIP_00488;inference=ab initio prediction:Prodigal:2.6;locus_tag=GNDLBLIP_00488;product=hypothetical protein
33958	Prodigal:2.6	CDS	395635	396105	.	-	0	ID=GNDLBLIP_00489;Name=pdtaR;dbxref=COG:COG3707;gene=pdtaR;inference=ab initio prediction:Prodigal:2.6,similar to AA sequence:UniProtKB:P9WGM3;locus_tag=GNDLBLIP_00489;product=putative transcriptional regulatory protein pdtaR
33958	Prodigal:2.6	CDS	396244	396450	.	-	0	ID=GNDLBLIP_00490;inference=ab initio prediction:Prodigal:2.6;locus_tag=GNDLBLIP_00490;product=hypothetical protein
33958	Prodigal:2.6	CDS	396865	397047	.	-	0	ID=GNDLBLIP_00491;inference=ab initio prediction:Prodigal:2.6;locus_tag=GNDLBLIP_00491;product=hypothetical protein
33958	Prodigal:2.6	CDS	397307	397510	.	+	0	ID=GNDLBLIP_00492;inference=ab initio prediction:Prodigal:2.6;locus_tag=GNDLBLIP_00492;product=hypothetical protein
33958	Prodigal:2.6	CDS	397569	398477	.	-	0	ID=GNDLBLIP_00493;inference=ab initio prediction:Prodigal:2.6;locus_tag=GNDLBLIP_00493;product=hypothetical protein
33958	Prodigal:2.6	CDS	398624	399196	.	+	0	ID=GNDLBLIP_00494;inference=ab initio prediction:Prodigal:2.6;locus_tag=GNDLBLIP_00494;product=hypothetical protein
33958	Prodigal:2.6	CDS	399284	399865	.	+	0	ID=GNDLBLIP_00495;inference=ab initio prediction:Prodigal:2.6;locus_tag=GNDLBLIP_00495;product=hypothetical protein
33958	Prodigal:2.6	CDS	399901	400779	.	+	0	ID=GNDLBLIP_00496;eC_number=3.4.16.4;inference=ab initio prediction:Prodigal:2.6,similar to AA sequence:UniProtKB:P15555;locus_tag=GNDLBLIP_00496;product=D-alanyl-D-alanine carboxypeptidase
33958	Prodigal:2.6	CDS	400853	403717	.	-	0	ID=GNDLBLIP_00497;Name=pfeA_1;dbxref=COG:COG4771;gene=pfeA_1;inference=ab initio prediction:Prodigal:2.6,similar to AA sequence:UniProtKB:Q05098;locus_tag=GNDLBLIP_00497;product=Ferric enterobactin receptor
33958	Prodigal:2.6	CDS	404009	404527	.	+	0	ID=GNDLBLIP_00498;inference=ab initio prediction:Prodigal:2.6;locus_tag=GNDLBLIP_00498;product=hypothetical protein
33958	Prodigal:2.6	CDS	404603	405100	.	-	0	ID=GNDLBLIP_00499;inference=ab initio prediction:Prodigal:2.6;locus_tag=GNDLBLIP_00499;product=hypothetical protein
33958	Prodigal:2.6	CDS	405183	406583	.	-	0	ID=GNDLBLIP_00500;Name=norG_1;dbxref=COG:COG1167;gene=norG_1;inference=ab initio prediction:Prodigal:2.6,similar to AA sequence:UniProtKB:Q2G1P1;locus_tag=GNDLBLIP_00500;product=HTH-type transcriptional regulator NorG
33958	Prodigal:2.6	CDS	406717	407265	.	-	0	ID=GNDLBLIP_00501;inference=ab initio prediction:Prodigal:2.6;locus_tag=GNDLBLIP_00501;product=hypothetical protein
33958	Prodigal:2.6	CDS	407466	408125	.	+	0	ID=GNDLBLIP_00502;inference=ab initio prediction:Prodigal:2.6;locus_tag=GNDLBLIP_00502;product=hypothetical protein
33958	Prodigal:2.6	CDS	408189	409310	.	+	0	ID=GNDLBLIP_00503;eC_number=3.1.1.31;Name=pgl_1;dbxref=COG:COG2706;gene=pgl_1;inference=ab initio prediction:Prodigal:2.6,similar to AA sequence:UniProtKB:O34499;locus_tag=GNDLBLIP_00503;product=6-phosphogluconolactonase
33958	Prodigal:2.6	CDS	409408	410094	.	+	0	ID=GNDLBLIP_00504;inference=ab initio prediction:Prodigal:2.6;locus_tag=GNDLBLIP_00504;product=hypothetical protein
33958	Prodigal:2.6	CDS	410114	410950	.	-	0	ID=GNDLBLIP_00505;inference=ab initio prediction:Prodigal:2.6;locus_tag=GNDLBLIP_00505;product=hypothetical protein
33958	Prodigal:2.6	CDS	411420	411911	.	+	0	ID=GNDLBLIP_00506;inference=ab initio prediction:Prodigal:2.6;locus_tag=GNDLBLIP_00506;product=hypothetical protein
33958	Prodigal:2.6	CDS	412044	412412	.	+	0	ID=GNDLBLIP_00507;inference=ab initio prediction:Prodigal:2.6;locus_tag=GNDLBLIP_00507;product=hypothetical protein
33958	Prodigal:2.6	CDS	412574	413314	.	+	0	ID=GNDLBLIP_00508;inference=ab initio prediction:Prodigal:2.6;locus_tag=GNDLBLIP_00508;product=hypothetical protein
33958	Prodigal:2.6	CDS	413390	415870	.	-	0	ID=GNDLBLIP_00509;Name=pupA_1;gene=pupA_1;inference=ab initio prediction:Prodigal:2.6,similar to AA sequence:UniProtKB:P25184;locus_tag=GNDLBLIP_00509;product=Ferric-pseudobactin 358 receptor
33958	Prodigal:2.6	CDS	416118	417071	.	-	0	ID=GNDLBLIP_00510;inference=ab initio prediction:Prodigal:2.6;locus_tag=GNDLBLIP_00510;product=hypothetical protein
33958	Prodigal:2.6	CDS	417372	418325	.	-	0	ID=GNDLBLIP_00511;inference=ab initio prediction:Prodigal:2.6;locus_tag=GNDLBLIP_00511;product=hypothetical protein
33958	Prodigal:2.6	CDS	418466	418918	.	+	0	ID=GNDLBLIP_00512;inference=ab initio prediction:Prodigal:2.6;locus_tag=GNDLBLIP_00512;product=hypothetical protein
33958	Prodigal:2.6	CDS	419245	419904	.	-	0	ID=GNDLBLIP_00513;inference=ab initio prediction:Prodigal:2.6;locus_tag=GNDLBLIP_00513;product=hypothetical protein
33958	Prodigal:2.6	CDS	420236	420676	.	-	0	ID=GNDLBLIP_00514;inference=ab initio prediction:Prodigal:2.6;locus_tag=GNDLBLIP_00514;product=hypothetical protein
33958	Prodigal:2.6	CDS	420677	420889	.	-	0	ID=GNDLBLIP_00515;inference=ab initio prediction:Prodigal:2.6;locus_tag=GNDLBLIP_00515;product=hypothetical protein
33958	Prodigal:2.6	CDS	421218	421997	.	+	0	ID=GNDLBLIP_00516;inference=ab initio prediction:Prodigal:2.6;locus_tag=GNDLBLIP_00516;product=hypothetical protein
33958	Prodigal:2.6	CDS	422139	422741	.	-	0	ID=GNDLBLIP_00517;inference=ab initio prediction:Prodigal:2.6;locus_tag=GNDLBLIP_00517;product=hypothetical protein
33958	Prodigal:2.6	CDS	422738	422986	.	-	0	ID=GNDLBLIP_00518;inference=ab initio prediction:Prodigal:2.6;locus_tag=GNDLBLIP_00518;product=hypothetical protein
33958	Prodigal:2.6	CDS	423034	423378	.	-	0	ID=GNDLBLIP_00519;inference=ab initio prediction:Prodigal:2.6;locus_tag=GNDLBLIP_00519;product=hypothetical protein
33958	Prodigal:2.6	CDS	423803	425602	.	+	0	ID=GNDLBLIP_00520;Name=bamA_2;gene=bamA_2;inference=ab initio prediction:Prodigal:2.6,protein motif:HAMAP:MF_01430;locus_tag=GNDLBLIP_00520;product=Outer membrane protein assembly factor BamA
33958	Prodigal:2.6	CDS	425830	426282	.	-	0	ID=GNDLBLIP_00521;inference=ab initio prediction:Prodigal:2.6;locus_tag=GNDLBLIP_00521;product=hypothetical protein
33958	Prodigal:2.6	CDS	426296	427678	.	-	0	ID=GNDLBLIP_00522;inference=ab initio prediction:Prodigal:2.6;locus_tag=GNDLBLIP_00522;product=hypothetical protein
33958	Prodigal:2.6	CDS	427856	428269	.	+	0	ID=GNDLBLIP_00523;inference=ab initio prediction:Prodigal:2.6;locus_tag=GNDLBLIP_00523;product=hypothetical protein
33958	Prodigal:2.6	CDS	428431	429096	.	-	0	ID=GNDLBLIP_00524;inference=ab initio prediction:Prodigal:2.6;locus_tag=GNDLBLIP_00524;product=hypothetical protein
33958	Prodigal:2.6	CDS	429093	429329	.	-	0	ID=GNDLBLIP_00525;inference=ab initio prediction:Prodigal:2.6;locus_tag=GNDLBLIP_00525;product=hypothetical protein
33958	Prodigal:2.6	CDS	429408	430256	.	-	0	ID=GNDLBLIP_00526;inference=ab initio prediction:Prodigal:2.6;locus_tag=GNDLBLIP_00526;product=hypothetical protein
33958	Prodigal:2.6	CDS	430603	432777	.	-	0	ID=GNDLBLIP_00527;inference=ab initio prediction:Prodigal:2.6;locus_tag=GNDLBLIP_00527;product=hypothetical protein
33958	Prodigal:2.6	CDS	432786	433112	.	-	0	ID=GNDLBLIP_00528;inference=ab initio prediction:Prodigal:2.6;locus_tag=GNDLBLIP_00528;product=hypothetical protein
33958	Prodigal:2.6	CDS	433445	433693	.	-	0	ID=GNDLBLIP_00529;inference=ab initio prediction:Prodigal:2.6;locus_tag=GNDLBLIP_00529;product=hypothetical protein
33958	Prodigal:2.6	CDS	433714	434145	.	-	0	ID=GNDLBLIP_00530;inference=ab initio prediction:Prodigal:2.6;locus_tag=GNDLBLIP_00530;product=hypothetical protein
33958	Prodigal:2.6	CDS	434153	435046	.	-	0	ID=GNDLBLIP_00531;inference=ab initio prediction:Prodigal:2.6;locus_tag=GNDLBLIP_00531;product=hypothetical protein
33958	Prodigal:2.6	CDS	434992	435915	.	-	0	ID=GNDLBLIP_00532;inference=ab initio prediction:Prodigal:2.6;locus_tag=GNDLBLIP_00532;product=hypothetical protein
33958	Prodigal:2.6	CDS	435930	436034	.	-	0	ID=GNDLBLIP_00533;inference=ab initio prediction:Prodigal:2.6;locus_tag=GNDLBLIP_00533;product=hypothetical protein
33958	Prodigal:2.6	CDS	436197	436655	.	-	0	ID=GNDLBLIP_00534;inference=ab initio prediction:Prodigal:2.6;locus_tag=GNDLBLIP_00534;product=hypothetical protein
33958	Prodigal:2.6	CDS	436885	437847	.	-	0	ID=GNDLBLIP_00535;inference=ab initio prediction:Prodigal:2.6;locus_tag=GNDLBLIP_00535;product=hypothetical protein
33958	Prodigal:2.6	CDS	438097	439482	.	-	0	ID=GNDLBLIP_00536;eC_number=3.6.-.-;Name=mnmE;dbxref=COG:COG0486;gene=mnmE;inference=ab initio prediction:Prodigal:2.6,similar to AA sequence:UniProtKB:Q8KAS1;locus_tag=GNDLBLIP_00536;product=tRNA modification GTPase MnmE
33958	Prodigal:2.6	CDS	440790	442559	.	-	0	ID=GNDLBLIP_00537;eC_number=3.4.11.-;Name=ypdF;dbxref=COG:COG0006;gene=ypdF;inference=ab initio prediction:Prodigal:2.6,similar to AA sequence:UniProtKB:P76524;locus_tag=GNDLBLIP_00537;product=Aminopeptidase YpdF
33958	Prodigal:2.6	CDS	442704	442952	.	-	0	ID=GNDLBLIP_00538;inference=ab initio prediction:Prodigal:2.6;locus_tag=GNDLBLIP_00538;product=hypothetical protein
33958	Prodigal:2.6	CDS	443027	443257	.	-	0	ID=GNDLBLIP_00539;inference=ab initio prediction:Prodigal:2.6;locus_tag=GNDLBLIP_00539;product=hypothetical protein
33958	Prodigal:2.6	CDS	443592	445238	.	+	0	ID=GNDLBLIP_00540;eC_number=1.2.1.88;Name=rocA;dbxref=COG:COG1012;gene=rocA;inference=ab initio prediction:Prodigal:2.6,similar to AA sequence:UniProtKB:P39634;locus_tag=GNDLBLIP_00540;product=1-pyrroline-5-carboxylate dehydrogenase
33958	Prodigal:2.6	CDS	445418	445516	.	+	0	ID=GNDLBLIP_00541;inference=ab initio prediction:Prodigal:2.6;locus_tag=GNDLBLIP_00541;product=hypothetical protein
33958	Prodigal:2.6	CDS	446234	446713	.	-	0	ID=GNDLBLIP_00542;Name=lrp_1;dbxref=COG:COG1522;gene=lrp_1;inference=ab initio prediction:Prodigal:2.6,similar to AA sequence:UniProtKB:P0ACJ0;locus_tag=GNDLBLIP_00542;product=Leucine-responsive regulatory protein
33958	Prodigal:2.6	CDS	447183	449501	.	+	0	ID=GNDLBLIP_00543;eC_number=2.1.1.14;Name=metE;dbxref=COG:COG0620;gene=metE;inference=ab initio prediction:Prodigal:2.6,similar to AA sequence:UniProtKB:P25665;locus_tag=GNDLBLIP_00543;product=5-methyltetrahydropteroyltriglutamate--homocysteine methyltransferase
33958	Prodigal:2.6	CDS	449575	449805	.	+	0	ID=GNDLBLIP_00544;eC_number=1.8.1.8;Name=dsbD_1;gene=dsbD_1;inference=ab initio prediction:Prodigal:2.6,protein motif:HAMAP:MF_00399;locus_tag=GNDLBLIP_00544;product=Thiol:disulfide interchange protein DsbD
33958	Prodigal:2.6	CDS	449820	450749	.	+	0	ID=GNDLBLIP_00545;inference=ab initio prediction:Prodigal:2.6;locus_tag=GNDLBLIP_00545;product=hypothetical protein
33958	Prodigal:2.6	CDS	450858	451427	.	+	0	ID=GNDLBLIP_00546;inference=ab initio prediction:Prodigal:2.6;locus_tag=GNDLBLIP_00546;product=hypothetical protein
33958	Prodigal:2.6	CDS	451427	451642	.	+	0	ID=GNDLBLIP_00547;inference=ab initio prediction:Prodigal:2.6;locus_tag=GNDLBLIP_00547;product=hypothetical protein
33958	Prodigal:2.6	CDS	451846	453048	.	-	0	ID=GNDLBLIP_00548;inference=ab initio prediction:Prodigal:2.6;locus_tag=GNDLBLIP_00548;product=hypothetical protein
33958	Prodigal:2.6	CDS	453053	454282	.	+	0	ID=GNDLBLIP_00549;Name=lolE;dbxref=COG:COG4591;gene=lolE;inference=ab initio prediction:Prodigal:2.6,similar to AA sequence:UniProtKB:P75958;locus_tag=GNDLBLIP_00549;product=Lipoprotein-releasing system transmembrane protein LolE
33958	Prodigal:2.6	CDS	454283	455314	.	+	0	ID=GNDLBLIP_00550;inference=ab initio prediction:Prodigal:2.6;locus_tag=GNDLBLIP_00550;product=hypothetical protein
33958	Prodigal:2.6	CDS	455372	456352	.	+	0	ID=GNDLBLIP_00551;eC_number=4.2.1.22;Name=cbs_1;dbxref=COG:COG0031;gene=cbs_1;inference=ab initio prediction:Prodigal:2.6,similar to AA sequence:UniProtKB:P9WP51;locus_tag=GNDLBLIP_00551;product=Putative cystathionine beta-synthase
33958	Prodigal:2.6	CDS	456589	457905	.	+	0	ID=GNDLBLIP_00552;inference=ab initio prediction:Prodigal:2.6;locus_tag=GNDLBLIP_00552;product=hypothetical protein
33958	Prodigal:2.6	CDS	458147	459160	.	+	0	ID=GNDLBLIP_00553;Name=macA;dbxref=COG:COG0845;gene=macA;inference=ab initio prediction:Prodigal:2.6,similar to AA sequence:UniProtKB:P75830;locus_tag=GNDLBLIP_00553;product=Macrolide export protein MacA
33958	Prodigal:2.6	CDS	459172	459918	.	+	0	ID=GNDLBLIP_00554;eC_number=3.6.3.-;Name=yknY_1;dbxref=COG:COG1136;gene=yknY_1;inference=ab initio prediction:Prodigal:2.6,similar to AA sequence:UniProtKB:O31711;locus_tag=GNDLBLIP_00554;product=putative ABC transporter ATP-binding protein YknY
33958	Prodigal:2.6	CDS	459930	461159	.	+	0	ID=GNDLBLIP_00555;eC_number=3.6.3.-;Name=macB_1;dbxref=COG:COG0577;gene=macB_1;inference=ab initio prediction:Prodigal:2.6,similar to AA sequence:UniProtKB:Q5MK06;locus_tag=GNDLBLIP_00555;product=Macrolide export ATP-binding/permease protein MacB
33958	Prodigal:2.6	CDS	461167	462603	.	-	0	ID=GNDLBLIP_00556;Name=yidK;dbxref=COG:COG4146;gene=yidK;inference=ab initio prediction:Prodigal:2.6,similar to AA sequence:UniProtKB:P31448;locus_tag=GNDLBLIP_00556;product=putative symporter YidK
33958	Prodigal:2.6	CDS	462687	463163	.	-	0	ID=GNDLBLIP_00557;eC_number=5.99.1.2;Name=topB_1;gene=topB_1;inference=ab initio prediction:Prodigal:2.6,protein motif:HAMAP:MF_00953;locus_tag=GNDLBLIP_00557;product=DNA topoisomerase 3
33958	Prodigal:2.6	CDS	463193	464794	.	-	0	ID=GNDLBLIP_00558;eC_number=5.99.1.2;Name=topB_2;dbxref=COG:COG0550;gene=topB_2;inference=ab initio prediction:Prodigal:2.6,similar to AA sequence:UniProtKB:P14294;locus_tag=GNDLBLIP_00558;product=DNA topoisomerase 3
33958	Prodigal:2.6	CDS	464913	465950	.	-	0	ID=GNDLBLIP_00559;eC_number=3.5.4.42;Name=atzC_1;gene=atzC_1;inference=ab initio prediction:Prodigal:2.6,similar to AA sequence:UniProtKB:O52063;locus_tag=GNDLBLIP_00559;product=N-isopropylammelide isopropyl amidohydrolase
33958	Prodigal:2.6	CDS	466213	467064	.	-	0	ID=GNDLBLIP_00560;Name=rhaS_4;gene=rhaS_4;inference=ab initio prediction:Prodigal:2.6,protein motif:HAMAP:MF_01534;locus_tag=GNDLBLIP_00560;product=HTH-type transcriptional activator RhaS
33958	Prodigal:2.6	CDS	467250	467912	.	-	0	ID=GNDLBLIP_00561;inference=ab initio prediction:Prodigal:2.6;locus_tag=GNDLBLIP_00561;product=hypothetical protein
33958	Prodigal:2.6	CDS	467932	469266	.	-	0	ID=GNDLBLIP_00562;eC_number=3.5.4.42;Name=atzC_2;gene=atzC_2;inference=ab initio prediction:Prodigal:2.6,similar to AA sequence:UniProtKB:O52063;locus_tag=GNDLBLIP_00562;product=N-isopropylammelide isopropyl amidohydrolase
33958	Prodigal:2.6	CDS	469380	469895	.	-	0	ID=GNDLBLIP_00563;eC_number=2.3.1.-;Name=yvbK;gene=yvbK;inference=ab initio prediction:Prodigal:2.6,similar to AA sequence:UniProtKB:O32248;locus_tag=GNDLBLIP_00563;product=putative N-acetyltransferase YvbK
33958	Prodigal:2.6	CDS	470071	470616	.	+	0	ID=GNDLBLIP_00564;inference=ab initio prediction:Prodigal:2.6;locus_tag=GNDLBLIP_00564;product=hypothetical protein
33958	Prodigal:2.6	CDS	470583	471521	.	+	0	ID=GNDLBLIP_00565;inference=ab initio prediction:Prodigal:2.6;locus_tag=GNDLBLIP_00565;product=hypothetical protein
33958	Prodigal:2.6	CDS	471761	472231	.	+	0	ID=GNDLBLIP_00566;inference=ab initio prediction:Prodigal:2.6;locus_tag=GNDLBLIP_00566;product=hypothetical protein
33958	Prodigal:2.6	CDS	472368	473981	.	-	0	ID=GNDLBLIP_00567;eC_number=6.3.5.4;Name=asnB;dbxref=COG:COG0367;gene=asnB;inference=ab initio prediction:Prodigal:2.6,similar to AA sequence:UniProtKB:P22106;locus_tag=GNDLBLIP_00567;product=Asparagine synthetase B [glutamine-hydrolyzing]
33958	Prodigal:2.6	CDS	474268	475893	.	-	0	ID=GNDLBLIP_00568;inference=ab initio prediction:Prodigal:2.6;locus_tag=GNDLBLIP_00568;product=hypothetical protein
33958	Prodigal:2.6	CDS	475978	476586	.	-	0	ID=GNDLBLIP_00569;inference=ab initio prediction:Prodigal:2.6;locus_tag=GNDLBLIP_00569;product=hypothetical protein
33958	Prodigal:2.6	CDS	476814	477179	.	-	0	ID=GNDLBLIP_00570;inference=ab initio prediction:Prodigal:2.6;locus_tag=GNDLBLIP_00570;product=hypothetical protein
33958	Prodigal:2.6	CDS	477228	478433	.	-	0	ID=GNDLBLIP_00571;eC_number=2.1.1.176;Name=rsmB;dbxref=COG:COG0144;gene=rsmB;inference=ab initio prediction:Prodigal:2.6,similar to AA sequence:UniProtKB:P36929;locus_tag=GNDLBLIP_00571;product=Ribosomal RNA small subunit methyltransferase B
33958	Prodigal:2.6	CDS	478570	478908	.	+	0	ID=GNDLBLIP_00572;inference=ab initio prediction:Prodigal:2.6;locus_tag=GNDLBLIP_00572;product=hypothetical protein
33958	Prodigal:2.6	CDS	479455	480393	.	-	0	ID=GNDLBLIP_00573;eC_number=3.6.3.30;Name=fbpC2;dbxref=COG:COG3842;gene=fbpC2;inference=ab initio prediction:Prodigal:2.6,similar to AA sequence:UniProtKB:P44513;locus_tag=GNDLBLIP_00573;product=Fe(3+) ions import ATP-binding protein FbpC 2
33958	Prodigal:2.6	CDS	480476	481135	.	+	0	ID=GNDLBLIP_00574;Name=yceI_2;dbxref=COG:COG2353;gene=yceI_2;inference=ab initio prediction:Prodigal:2.6,similar to AA sequence:UniProtKB:P0A8X2;locus_tag=GNDLBLIP_00574;product=Protein YceI
33958	Prodigal:2.6	CDS	481222	482253	.	+	0	ID=GNDLBLIP_00575;eC_number=6.1.1.20;Name=pheS;dbxref=COG:COG0016;gene=pheS;inference=ab initio prediction:Prodigal:2.6,similar to AA sequence:UniProtKB:Q9I0A3;locus_tag=GNDLBLIP_00575;product=Phenylalanine--tRNA ligase alpha subunit
33958	Prodigal:2.6	CDS	482335	482577	.	-	0	ID=GNDLBLIP_00576;inference=ab initio prediction:Prodigal:2.6;locus_tag=GNDLBLIP_00576;product=hypothetical protein
33958	Prodigal:2.6	CDS	482571	483098	.	-	0	ID=GNDLBLIP_00577;inference=ab initio prediction:Prodigal:2.6;locus_tag=GNDLBLIP_00577;product=hypothetical protein
33958	Prodigal:2.6	CDS	483283	484335	.	+	0	ID=GNDLBLIP_00578;eC_number=1.18.1.2;dbxref=COG:COG0492;inference=ab initio prediction:Prodigal:2.6,similar to AA sequence:UniProtKB:Q8KCB2;locus_tag=GNDLBLIP_00578;product=Ferredoxin--NADP reductase
33958	Prodigal:2.6	CDS	484480	487152	.	-	0	ID=GNDLBLIP_00579;inference=ab initio prediction:Prodigal:2.6;locus_tag=GNDLBLIP_00579;product=hypothetical protein
33958	Prodigal:2.6	CDS	487216	487590	.	-	0	ID=GNDLBLIP_00580;inference=ab initio prediction:Prodigal:2.6;locus_tag=GNDLBLIP_00580;product=hypothetical protein
33958	Prodigal:2.6	CDS	487726	488058	.	+	0	ID=GNDLBLIP_00581;Name=thcC;gene=thcC;inference=ab initio prediction:Prodigal:2.6,similar to AA sequence:UniProtKB:P43493;locus_tag=GNDLBLIP_00581;product=Rhodocoxin
33958	Prodigal:2.6	CDS	488120	489559	.	-	0	ID=GNDLBLIP_00582;eC_number=3.4.13.18;Name=pepD;dbxref=COG:COG2195;gene=pepD;inference=ab initio prediction:Prodigal:2.6,similar to AA sequence:UniProtKB:P15288;locus_tag=GNDLBLIP_00582;product=Cytosol non-specific dipeptidase
33958	Prodigal:2.6	CDS	489561	489770	.	-	0	ID=GNDLBLIP_00583;inference=ab initio prediction:Prodigal:2.6;locus_tag=GNDLBLIP_00583;product=hypothetical protein
33958	Prodigal:2.6	CDS	489818	490612	.	-	0	ID=GNDLBLIP_00584;eC_number=1.13.12.16;dbxref=COG:COG2070;inference=ab initio prediction:Prodigal:2.6,similar to AA sequence:UniProtKB:Q9I4V0;locus_tag=GNDLBLIP_00584;product=Nitronate monooxygenase
33958	Prodigal:2.6	CDS	490684	491088	.	-	0	ID=GNDLBLIP_00585;inference=ab initio prediction:Prodigal:2.6;locus_tag=GNDLBLIP_00585;product=hypothetical protein
33958	Prodigal:2.6	CDS	491148	491336	.	-	0	ID=GNDLBLIP_00586;inference=ab initio prediction:Prodigal:2.6;locus_tag=GNDLBLIP_00586;product=hypothetical protein
33958	Prodigal:2.6	CDS	491381	491986	.	+	0	ID=GNDLBLIP_00587;Name=recR;dbxref=COG:COG0353;gene=recR;inference=ab initio prediction:Prodigal:2.6,similar to AA sequence:UniProtKB:Q8RDI4;locus_tag=GNDLBLIP_00587;product=Recombination protein RecR
33958	Prodigal:2.6	CDS	492485	492853	.	-	0	ID=GNDLBLIP_00588;inference=ab initio prediction:Prodigal:2.6;locus_tag=GNDLBLIP_00588;product=hypothetical protein
33958	Prodigal:2.6	CDS	493003	493407	.	-	0	ID=GNDLBLIP_00589;eC_number=3.5.1.2;Name=glsA_1;dbxref=COG:COG2066;gene=glsA_1;inference=ab initio prediction:Prodigal:2.6,similar to AA sequence:UniProtKB:Q5KY26;locus_tag=GNDLBLIP_00589;product=Glutaminase
33958	Prodigal:2.6	CDS	493407	494030	.	-	0	ID=GNDLBLIP_00590;eC_number=3.5.1.2;Name=glsA_2;dbxref=COG:COG2066;gene=glsA_2;inference=ab initio prediction:Prodigal:2.6,similar to AA sequence:UniProtKB:Q5KY26;locus_tag=GNDLBLIP_00590;product=Glutaminase
33958	Prodigal:2.6	CDS	494109	495398	.	-	0	ID=GNDLBLIP_00591;inference=ab initio prediction:Prodigal:2.6;locus_tag=GNDLBLIP_00591;product=hypothetical protein
33958	Prodigal:2.6	CDS	495631	496038	.	-	0	ID=GNDLBLIP_00592;inference=ab initio prediction:Prodigal:2.6;locus_tag=GNDLBLIP_00592;product=hypothetical protein
33958	Prodigal:2.6	CDS	496296	496460	.	-	0	ID=GNDLBLIP_00593;Name=ftsK;dbxref=COG:COG1674;gene=ftsK;inference=ab initio prediction:Prodigal:2.6,similar to AA sequence:UniProtKB:P9WNA3;locus_tag=GNDLBLIP_00593;product=DNA translocase FtsK
33958	Prodigal:2.6	CDS	496487	497911	.	-	0	ID=GNDLBLIP_00594;Name=spoIIIE;dbxref=COG:COG1674;gene=spoIIIE;inference=ab initio prediction:Prodigal:2.6,similar to AA sequence:UniProtKB:P21458;locus_tag=GNDLBLIP_00594;product=DNA translocase SpoIIIE
33958	Prodigal:2.6	CDS	498072	498404	.	-	0	ID=GNDLBLIP_00595;inference=ab initio prediction:Prodigal:2.6;locus_tag=GNDLBLIP_00595;product=hypothetical protein
33958	Prodigal:2.6	CDS	498438	498659	.	+	0	ID=GNDLBLIP_00596;inference=ab initio prediction:Prodigal:2.6;locus_tag=GNDLBLIP_00596;product=hypothetical protein
33958	Prodigal:2.6	CDS	498967	501168	.	+	0	ID=GNDLBLIP_00597;inference=ab initio prediction:Prodigal:2.6;locus_tag=GNDLBLIP_00597;product=hypothetical protein
33958	Prodigal:2.6	CDS	501162	502247	.	+	0	ID=GNDLBLIP_00598;Name=ccsA;gene=ccsA;inference=ab initio prediction:Prodigal:2.6,similar to AA sequence:UniProtKB:P72978;locus_tag=GNDLBLIP_00598;product=Cytochrome c biogenesis protein CcsA
33958	Prodigal:2.6	CDS	502335	502925	.	-	0	ID=GNDLBLIP_00599;inference=ab initio prediction:Prodigal:2.6;locus_tag=GNDLBLIP_00599;product=hypothetical protein
33958	Prodigal:2.6	CDS	503114	503980	.	+	0	ID=GNDLBLIP_00600;inference=ab initio prediction:Prodigal:2.6;locus_tag=GNDLBLIP_00600;product=hypothetical protein
33958	Prodigal:2.6	CDS	504271	504561	.	-	0	ID=GNDLBLIP_00601;inference=ab initio prediction:Prodigal:2.6;locus_tag=GNDLBLIP_00601;product=hypothetical protein
33958	Prodigal:2.6	CDS	504748	507021	.	+	0	ID=GNDLBLIP_00602;eC_number=1.9.3.1;Name=fixN_1;gene=fixN_1;inference=ab initio prediction:Prodigal:2.6,similar to AA sequence:UniProtKB:Q05572;locus_tag=GNDLBLIP_00602;product=Cytochrome c oxidase subunit 1 %2C bacteroid
33958	Prodigal:2.6	CDS	507039	507350	.	+	0	ID=GNDLBLIP_00603;inference=ab initio prediction:Prodigal:2.6;locus_tag=GNDLBLIP_00603;product=hypothetical protein
33958	Prodigal:2.6	CDS	507293	507556	.	+	0	ID=GNDLBLIP_00604;Name=ccoP1;gene=ccoP1;inference=ab initio prediction:Prodigal:2.6,similar to AA sequence:UniProtKB:D9IA45;locus_tag=GNDLBLIP_00604;product=Cbb3-type cytochrome c oxidase subunit CcoP1
33958	Prodigal:2.6	CDS	507511	507915	.	+	0	ID=GNDLBLIP_00605;Name=ccoP;gene=ccoP;inference=ab initio prediction:Prodigal:2.6,similar to AA sequence:UniProtKB:Q5GCA5;locus_tag=GNDLBLIP_00605;product=Cbb3-type cytochrome c oxidase subunit CcoP
33958	Prodigal:2.6	CDS	508668	509309	.	-	0	ID=GNDLBLIP_00606;inference=ab initio prediction:Prodigal:2.6;locus_tag=GNDLBLIP_00606;product=hypothetical protein
33958	Prodigal:2.6	CDS	509700	509906	.	-	0	ID=GNDLBLIP_00607;inference=ab initio prediction:Prodigal:2.6;locus_tag=GNDLBLIP_00607;product=hypothetical protein
33958	Prodigal:2.6	CDS	509961	510293	.	-	0	ID=GNDLBLIP_00608;inference=ab initio prediction:Prodigal:2.6;locus_tag=GNDLBLIP_00608;product=hypothetical protein
33958	Prodigal:2.6	CDS	510400	511254	.	+	0	ID=GNDLBLIP_00609;Name=yqeN;dbxref=COG:COG1466;gene=yqeN;inference=ab initio prediction:Prodigal:2.6,similar to AA sequence:UniProtKB:P54459;locus_tag=GNDLBLIP_00609;product=putative protein YqeN
33958	Prodigal:2.6	CDS	511251	511436	.	+	0	ID=GNDLBLIP_00610;inference=ab initio prediction:Prodigal:2.6;locus_tag=GNDLBLIP_00610;product=hypothetical protein
33958	Prodigal:2.6	CDS	511622	512572	.	+	0	ID=GNDLBLIP_00611;eC_number=1.8.1.9;Name=trxB_1;dbxref=COG:COG0492;gene=trxB_1;inference=ab initio prediction:Prodigal:2.6,similar to AA sequence:UniProtKB:P0A9P4;locus_tag=GNDLBLIP_00611;product=Thioredoxin reductase
33958	Aragorn:1.2	tRNA	512831	512916	.	+	.	ID=GNDLBLIP_00612;inference=COORDINATES:profile:Aragorn:1.2;locus_tag=GNDLBLIP_00612;product=tRNA-Ser(tga)
33958	Prodigal:2.6	CDS	513023	514090	.	-	0	ID=GNDLBLIP_00613;eC_number=3.4.16.4;inference=ab initio prediction:Prodigal:2.6,similar to AA sequence:UniProtKB:P15555;locus_tag=GNDLBLIP_00613;product=D-alanyl-D-alanine carboxypeptidase
33958	Prodigal:2.6	CDS	514396	515523	.	-	0	ID=GNDLBLIP_00614;eC_number=1.14.13.9;Name=kmo;dbxref=COG:COG0654;gene=kmo;inference=ab initio prediction:Prodigal:2.6,similar to AA sequence:UniProtKB:Q11PP7;locus_tag=GNDLBLIP_00614;product=Kynurenine 3-monooxygenase
33958	Prodigal:2.6	CDS	515623	515892	.	+	0	ID=GNDLBLIP_00615;inference=ab initio prediction:Prodigal:2.6;locus_tag=GNDLBLIP_00615;product=hypothetical protein
33958	Prodigal:2.6	CDS	515889	516548	.	+	0	ID=GNDLBLIP_00616;Name=pchR_1;dbxref=COG:COG2207;gene=pchR_1;inference=ab initio prediction:Prodigal:2.6,similar to AA sequence:UniProtKB:P40883;locus_tag=GNDLBLIP_00616;product=Regulatory protein PchR
33958	Prodigal:2.6	CDS	516734	516994	.	-	0	ID=GNDLBLIP_00617;inference=ab initio prediction:Prodigal:2.6;locus_tag=GNDLBLIP_00617;product=hypothetical protein
33958	Prodigal:2.6	CDS	517491	519002	.	+	0	ID=GNDLBLIP_00618;inference=ab initio prediction:Prodigal:2.6;locus_tag=GNDLBLIP_00618;product=hypothetical protein
33958	Prodigal:2.6	CDS	519053	519742	.	-	0	ID=GNDLBLIP_00619;inference=ab initio prediction:Prodigal:2.6;locus_tag=GNDLBLIP_00619;product=hypothetical protein
33958	Prodigal:2.6	CDS	519871	520521	.	-	0	ID=GNDLBLIP_00620;eC_number=3.5.99.2;Name=tenA_1;dbxref=COG:COG0819;gene=tenA_1;inference=ab initio prediction:Prodigal:2.6,similar to AA sequence:UniProtKB:P25052;locus_tag=GNDLBLIP_00620;product=Aminopyrimidine aminohydrolase
33958	Prodigal:2.6	CDS	520508	521341	.	-	0	ID=GNDLBLIP_00621;eC_number=2.7.1.49;Name=thiD_1;dbxref=COG:COG0351;gene=thiD_1;inference=ab initio prediction:Prodigal:2.6,similar to AA sequence:UniProtKB:P76422;locus_tag=GNDLBLIP_00621;product=Hydroxymethylpyrimidine/phosphomethylpyrimidine kinase
33958	Prodigal:2.6	CDS	521338	521976	.	-	0	ID=GNDLBLIP_00622;eC_number=2.5.1.3;Name=thiE_1;dbxref=COG:COG0352;gene=thiE_1;inference=ab initio prediction:Prodigal:2.6,similar to AA sequence:UniProtKB:P39594;locus_tag=GNDLBLIP_00622;product=Thiamine-phosphate synthase
33958	Prodigal:2.6	CDS	521973	522770	.	-	0	ID=GNDLBLIP_00623;eC_number=2.7.1.50;Name=thiM_1;dbxref=COG:COG2145;gene=thiM_1;inference=ab initio prediction:Prodigal:2.6,similar to AA sequence:UniProtKB:P39593;locus_tag=GNDLBLIP_00623;product=Hydroxyethylthiazole kinase
33958	Prodigal:2.6	CDS	523347	524114	.	+	0	ID=GNDLBLIP_00624;inference=ab initio prediction:Prodigal:2.6;locus_tag=GNDLBLIP_00624;product=hypothetical protein
33958	Prodigal:2.6	CDS	524080	524793	.	+	0	ID=GNDLBLIP_00625;Name=natR;dbxref=COG:COG3279;gene=natR;inference=ab initio prediction:Prodigal:2.6,similar to AA sequence:UniProtKB:P70955;locus_tag=GNDLBLIP_00625;product=Transcriptional regulatory protein NatR
33958	Prodigal:2.6	CDS	524740	524910	.	-	0	ID=GNDLBLIP_00626;inference=ab initio prediction:Prodigal:2.6;locus_tag=GNDLBLIP_00626;product=hypothetical protein
33958	Prodigal:2.6	CDS	524961	525626	.	+	0	ID=GNDLBLIP_00627;Name=gerN_1;dbxref=COG:COG0475;gene=gerN_1;inference=ab initio prediction:Prodigal:2.6,similar to AA sequence:UniProtKB:Q9KI10;locus_tag=GNDLBLIP_00627;product=Na(+)/H(+)-K(+) antiporter GerN
33958	Prodigal:2.6	CDS	525595	527238	.	+	0	ID=GNDLBLIP_00628;Name=gerN_2;dbxref=COG:COG0475;gene=gerN_2;inference=ab initio prediction:Prodigal:2.6,similar to AA sequence:UniProtKB:Q9KI10;locus_tag=GNDLBLIP_00628;product=Na(+)/H(+)-K(+) antiporter GerN
33958	Prodigal:2.6	CDS	527292	527537	.	+	0	ID=GNDLBLIP_00629;inference=ab initio prediction:Prodigal:2.6;locus_tag=GNDLBLIP_00629;product=hypothetical protein
33958	Prodigal:2.6	CDS	527516	527707	.	+	0	ID=GNDLBLIP_00630;inference=ab initio prediction:Prodigal:2.6;locus_tag=GNDLBLIP_00630;product=hypothetical protein
33958	Prodigal:2.6	CDS	527793	528440	.	-	0	ID=GNDLBLIP_00631;inference=ab initio prediction:Prodigal:2.6;locus_tag=GNDLBLIP_00631;product=hypothetical protein
33958	Prodigal:2.6	CDS	528798	529748	.	+	0	ID=GNDLBLIP_00632;inference=ab initio prediction:Prodigal:2.6;locus_tag=GNDLBLIP_00632;product=hypothetical protein
33958	Prodigal:2.6	CDS	529783	530226	.	+	0	ID=GNDLBLIP_00633;inference=ab initio prediction:Prodigal:2.6;locus_tag=GNDLBLIP_00633;product=hypothetical protein
33958	Prodigal:2.6	CDS	530210	530695	.	+	0	ID=GNDLBLIP_00634;Name=araC_1;gene=araC_1;inference=ab initio prediction:Prodigal:2.6,similar to AA sequence:UniProtKB:P0A9E0;locus_tag=GNDLBLIP_00634;product=Arabinose operon regulatory protein
33958	Prodigal:2.6	CDS	530988	531278	.	+	0	ID=GNDLBLIP_00635;inference=ab initio prediction:Prodigal:2.6;locus_tag=GNDLBLIP_00635;product=hypothetical protein
33958	Prodigal:2.6	CDS	531344	532342	.	+	0	ID=GNDLBLIP_00636;inference=ab initio prediction:Prodigal:2.6;locus_tag=GNDLBLIP_00636;product=hypothetical protein
33958	Prodigal:2.6	CDS	532583	532834	.	+	0	ID=GNDLBLIP_00637;inference=ab initio prediction:Prodigal:2.6;locus_tag=GNDLBLIP_00637;product=hypothetical protein
33958	Prodigal:2.6	CDS	532900	533427	.	+	0	ID=GNDLBLIP_00638;inference=ab initio prediction:Prodigal:2.6;locus_tag=GNDLBLIP_00638;product=hypothetical protein
33958	Prodigal:2.6	CDS	533444	533761	.	-	0	ID=GNDLBLIP_00639;inference=ab initio prediction:Prodigal:2.6;locus_tag=GNDLBLIP_00639;product=hypothetical protein
33958	Prodigal:2.6	CDS	533707	534174	.	-	0	ID=GNDLBLIP_00640;inference=ab initio prediction:Prodigal:2.6;locus_tag=GNDLBLIP_00640;product=hypothetical protein
33958	Prodigal:2.6	CDS	534192	534635	.	-	0	ID=GNDLBLIP_00641;eC_number=3.1.1.-;Name=estB_1;dbxref=COG:COG1680;gene=estB_1;inference=ab initio prediction:Prodigal:2.6,similar to AA sequence:UniProtKB:Q9KX40;locus_tag=GNDLBLIP_00641;product=Esterase EstB
33958	Prodigal:2.6	CDS	534847	535635	.	-	0	ID=GNDLBLIP_00642;eC_number=5.1.-.-;Name=yddE;dbxref=COG:COG0384;gene=yddE;inference=ab initio prediction:Prodigal:2.6,similar to AA sequence:UniProtKB:P37757;locus_tag=GNDLBLIP_00642;product=putative isomerase YddE
33958	Prodigal:2.6	CDS	535787	536329	.	+	0	ID=GNDLBLIP_00643;eC_number=2.3.1.-;Name=ydaF_2;dbxref=COG:COG1670;gene=ydaF_2;inference=ab initio prediction:Prodigal:2.6,similar to AA sequence:UniProtKB:P96579;locus_tag=GNDLBLIP_00643;product=Putative ribosomal N-acetyltransferase YdaF
33958	Prodigal:2.6	CDS	536603	536824	.	+	0	ID=GNDLBLIP_00644;inference=ab initio prediction:Prodigal:2.6;locus_tag=GNDLBLIP_00644;product=hypothetical protein
33958	Prodigal:2.6	CDS	536945	537607	.	+	0	ID=GNDLBLIP_00645;inference=ab initio prediction:Prodigal:2.6;locus_tag=GNDLBLIP_00645;product=hypothetical protein
33958	Prodigal:2.6	CDS	538083	538337	.	-	0	ID=GNDLBLIP_00646;inference=ab initio prediction:Prodigal:2.6;locus_tag=GNDLBLIP_00646;product=hypothetical protein
33958	Prodigal:2.6	CDS	538440	538694	.	-	0	ID=GNDLBLIP_00647;inference=ab initio prediction:Prodigal:2.6;locus_tag=GNDLBLIP_00647;product=hypothetical protein
33958	Aragorn:1.2	tRNA	538744	538818	.	-	.	ID=GNDLBLIP_00648;inference=COORDINATES:profile:Aragorn:1.2;locus_tag=GNDLBLIP_00648;product=tRNA-Arg(tct)
33958	Aragorn:1.2	tRNA	538861	538936	.	-	.	ID=GNDLBLIP_00649;inference=COORDINATES:profile:Aragorn:1.2;locus_tag=GNDLBLIP_00649;product=tRNA-Pro(tgg)
33958	Aragorn:1.2	tRNA	539017	539091	.	-	.	ID=GNDLBLIP_00650;inference=COORDINATES:profile:Aragorn:1.2;locus_tag=GNDLBLIP_00650;product=tRNA-Arg(tct)
33958	Aragorn:1.2	tRNA	539136	539211	.	-	.	ID=GNDLBLIP_00651;inference=COORDINATES:profile:Aragorn:1.2;locus_tag=GNDLBLIP_00651;product=tRNA-Pro(tgg)
33958	Aragorn:1.2	tRNA	539227	539312	.	-	.	ID=GNDLBLIP_00652;inference=COORDINATES:profile:Aragorn:1.2;locus_tag=GNDLBLIP_00652;product=tRNA-Ser(gct)
33958	Prodigal:2.6	CDS	539480	540484	.	+	0	ID=GNDLBLIP_00653;eC_number=3.5.1.28;Name=amiD;dbxref=COG:COG3023;gene=amiD;inference=ab initio prediction:Prodigal:2.6,similar to AA sequence:UniProtKB:P75820;locus_tag=GNDLBLIP_00653;product=N-acetylmuramoyl-L-alanine amidase AmiD
33958	Prodigal:2.6	CDS	540652	540936	.	+	0	ID=GNDLBLIP_00654;eC_number=4.3.1.1;Name=aspA_1;dbxref=COG:COG1027;gene=aspA_1;inference=ab initio prediction:Prodigal:2.6,similar to AA sequence:UniProtKB:P0AC38;locus_tag=GNDLBLIP_00654;product=Aspartate ammonia-lyase
33958	Prodigal:2.6	CDS	540909	542054	.	+	0	ID=GNDLBLIP_00655;eC_number=4.3.1.1;Name=aspA_2;dbxref=COG:COG1027;gene=aspA_2;inference=ab initio prediction:Prodigal:2.6,similar to AA sequence:UniProtKB:P0AC38;locus_tag=GNDLBLIP_00655;product=Aspartate ammonia-lyase
33958	Prodigal:2.6	CDS	542138	543415	.	+	0	ID=GNDLBLIP_00656;inference=ab initio prediction:Prodigal:2.6;locus_tag=GNDLBLIP_00656;product=hypothetical protein
33958	Prodigal:2.6	CDS	543412	543783	.	+	0	ID=GNDLBLIP_00657;inference=ab initio prediction:Prodigal:2.6;locus_tag=GNDLBLIP_00657;product=hypothetical protein
33958	Prodigal:2.6	CDS	543849	545051	.	+	0	ID=GNDLBLIP_00658;inference=ab initio prediction:Prodigal:2.6;locus_tag=GNDLBLIP_00658;product=hypothetical protein
33958	Prodigal:2.6	CDS	545447	546823	.	+	0	ID=GNDLBLIP_00659;Name=opuE;dbxref=COG:COG0591;gene=opuE;inference=ab initio prediction:Prodigal:2.6,similar to AA sequence:UniProtKB:O06493;locus_tag=GNDLBLIP_00659;product=Osmoregulated proline transporter OpuE
33958	Prodigal:2.6	CDS	546991	547365	.	+	0	ID=GNDLBLIP_00660;eC_number=3.2.1.21;dbxref=COG:COG1472;inference=ab initio prediction:Prodigal:2.6,similar to AA sequence:UniProtKB:A7LXS8;locus_tag=GNDLBLIP_00660;product=Beta-glucosidase BoGH3A
33958	Prodigal:2.6	CDS	547346	549253	.	+	0	ID=GNDLBLIP_00661;eC_number=3.2.1.21;dbxref=COG:COG1472;inference=ab initio prediction:Prodigal:2.6,similar to AA sequence:UniProtKB:A7LXS8;locus_tag=GNDLBLIP_00661;product=Beta-glucosidase BoGH3A
33958	Prodigal:2.6	CDS	549322	551133	.	-	0	ID=GNDLBLIP_00662;eC_number=3.4.14.-;inference=ab initio prediction:Prodigal:2.6,similar to AA sequence:UniProtKB:A6GWM2;locus_tag=GNDLBLIP_00662;product=Asp/Glu-specific dipeptidyl-peptidase
33958	Prodigal:2.6	CDS	551097	551456	.	-	0	ID=GNDLBLIP_00663;eC_number=3.4.14.-;inference=ab initio prediction:Prodigal:2.6,similar to AA sequence:UniProtKB:C2M741;locus_tag=GNDLBLIP_00663;product=Asp/Glu-specific dipeptidyl-peptidase
33958	Prodigal:2.6	CDS	551590	552069	.	+	0	ID=GNDLBLIP_00664;Name=nlpE;dbxref=COG:COG3015;gene=nlpE;inference=ab initio prediction:Prodigal:2.6,similar to AA sequence:UniProtKB:P40710;locus_tag=GNDLBLIP_00664;product=Lipoprotein NlpE
33958	Prodigal:2.6	CDS	552118	552489	.	-	0	ID=GNDLBLIP_00665;inference=ab initio prediction:Prodigal:2.6;locus_tag=GNDLBLIP_00665;product=hypothetical protein
33958	Prodigal:2.6	CDS	552501	553145	.	-	0	ID=GNDLBLIP_00666;Name=sapB_1;dbxref=COG:COG1285;gene=sapB_1;inference=ab initio prediction:Prodigal:2.6,similar to AA sequence:UniProtKB:Q45514;locus_tag=GNDLBLIP_00666;product=Protein SapB
33958	Prodigal:2.6	CDS	553235	553852	.	-	0	ID=GNDLBLIP_00667;eC_number=2.7.13.3;Name=resE;gene=resE;inference=ab initio prediction:Prodigal:2.6,similar to AA sequence:UniProtKB:P35164;locus_tag=GNDLBLIP_00667;product=Sensor histidine kinase ResE
33958	Prodigal:2.6	CDS	553957	554955	.	-	0	ID=GNDLBLIP_00668;eC_number=2.7.13.3;Name=walK;gene=walK;inference=ab initio prediction:Prodigal:2.6,similar to AA sequence:UniProtKB:Q2G2U4;locus_tag=GNDLBLIP_00668;product=Sensor protein kinase WalK
33958	Prodigal:2.6	CDS	554961	555422	.	-	0	ID=GNDLBLIP_00669;eC_number=2.7.13.3;Name=kdpD_1;dbxref=COG:COG2205;gene=kdpD_1;inference=ab initio prediction:Prodigal:2.6,similar to AA sequence:UniProtKB:P21865;locus_tag=GNDLBLIP_00669;product=Sensor protein KdpD
33958	Prodigal:2.6	CDS	555482	555967	.	-	0	ID=GNDLBLIP_00670;eC_number=2.7.13.3;Name=kdpD_2;dbxref=COG:COG2205;gene=kdpD_2;inference=ab initio prediction:Prodigal:2.6,similar to AA sequence:UniProtKB:P9WGL3;locus_tag=GNDLBLIP_00670;product=Sensor protein KdpD
33958	Prodigal:2.6	CDS	555906	556070	.	-	0	ID=GNDLBLIP_00671;inference=ab initio prediction:Prodigal:2.6;locus_tag=GNDLBLIP_00671;product=hypothetical protein
33958	Prodigal:2.6	CDS	556241	557302	.	-	0	ID=GNDLBLIP_00672;inference=ab initio prediction:Prodigal:2.6;locus_tag=GNDLBLIP_00672;product=hypothetical protein
33958	Prodigal:2.6	CDS	557394	557960	.	-	0	ID=GNDLBLIP_00673;Name=kdpC;dbxref=COG:COG2156;gene=kdpC;inference=ab initio prediction:Prodigal:2.6,similar to AA sequence:UniProtKB:P9WKF1;locus_tag=GNDLBLIP_00673;product=Potassium-transporting ATPase KdpC subunit
33958	Prodigal:2.6	CDS	557972	558472	.	-	0	ID=GNDLBLIP_00674;eC_number=3.6.3.12;Name=kdpB_1;dbxref=COG:COG2216;gene=kdpB_1;inference=ab initio prediction:Prodigal:2.6,similar to AA sequence:UniProtKB:P03960;locus_tag=GNDLBLIP_00674;product=Potassium-transporting ATPase ATP-binding subunit
33958	Prodigal:2.6	CDS	558469	560010	.	-	0	ID=GNDLBLIP_00675;eC_number=3.6.3.12;Name=kdpB_2;dbxref=COG:COG2216;gene=kdpB_2;inference=ab initio prediction:Prodigal:2.6,similar to AA sequence:UniProtKB:P03960;locus_tag=GNDLBLIP_00675;product=Potassium-transporting ATPase ATP-binding subunit
33958	Prodigal:2.6	CDS	560036	561730	.	-	0	ID=GNDLBLIP_00676;Name=kdpA;dbxref=COG:COG2060;gene=kdpA;inference=ab initio prediction:Prodigal:2.6,similar to AA sequence:UniProtKB:O32327;locus_tag=GNDLBLIP_00676;product=Potassium-transporting ATPase potassium-binding subunit
33958	Prodigal:2.6	CDS	562256	563584	.	-	0	ID=GNDLBLIP_00677;Name=atoC;dbxref=COG:COG2204;gene=atoC;inference=ab initio prediction:Prodigal:2.6,similar to AA sequence:UniProtKB:Q06065;locus_tag=GNDLBLIP_00677;product=Regulatory protein AtoC
33958	Prodigal:2.6	CDS	563695	564147	.	-	0	ID=GNDLBLIP_00678;inference=ab initio prediction:Prodigal:2.6;locus_tag=GNDLBLIP_00678;product=hypothetical protein
33958	Prodigal:2.6	CDS	564157	564537	.	-	0	ID=GNDLBLIP_00679;inference=ab initio prediction:Prodigal:2.6;locus_tag=GNDLBLIP_00679;product=hypothetical protein
33958	Prodigal:2.6	CDS	564664	566643	.	-	0	ID=GNDLBLIP_00680;eC_number=3.6.3.5;Name=ziaA;gene=ziaA;inference=ab initio prediction:Prodigal:2.6,similar to AA sequence:UniProtKB:Q59998;locus_tag=GNDLBLIP_00680;product=Zinc-transporting ATPase
33958	Prodigal:2.6	CDS	566701	567408	.	-	0	ID=GNDLBLIP_00681;Name=lytR_1;dbxref=COG:COG3279;gene=lytR_1;inference=ab initio prediction:Prodigal:2.6,similar to AA sequence:UniProtKB:P60611;locus_tag=GNDLBLIP_00681;product=Sensory transduction protein LytR
33958	Prodigal:2.6	CDS	567408	567764	.	-	0	ID=GNDLBLIP_00682;inference=ab initio prediction:Prodigal:2.6;locus_tag=GNDLBLIP_00682;product=hypothetical protein
33958	Prodigal:2.6	CDS	567731	568009	.	-	0	ID=GNDLBLIP_00683;eC_number=2.7.13.3;Name=ypdA_1;dbxref=COG:COG3275;gene=ypdA_1;inference=ab initio prediction:Prodigal:2.6,similar to AA sequence:UniProtKB:P0AA93;locus_tag=GNDLBLIP_00683;product=Sensor histidine kinase YpdA
33958	Prodigal:2.6	CDS	568027	568599	.	-	0	ID=GNDLBLIP_00684;inference=ab initio prediction:Prodigal:2.6;locus_tag=GNDLBLIP_00684;product=hypothetical protein
33958	Prodigal:2.6	CDS	568635	569372	.	-	0	ID=GNDLBLIP_00685;inference=ab initio prediction:Prodigal:2.6;locus_tag=GNDLBLIP_00685;product=hypothetical protein
33958	Prodigal:2.6	CDS	569535	570020	.	+	0	ID=GNDLBLIP_00686;inference=ab initio prediction:Prodigal:2.6;locus_tag=GNDLBLIP_00686;product=hypothetical protein
33958	Prodigal:2.6	CDS	570025	570450	.	-	0	ID=GNDLBLIP_00687;inference=ab initio prediction:Prodigal:2.6;locus_tag=GNDLBLIP_00687;product=hypothetical protein
33958	Prodigal:2.6	CDS	570585	571088	.	+	0	ID=GNDLBLIP_00688;inference=ab initio prediction:Prodigal:2.6;locus_tag=GNDLBLIP_00688;product=hypothetical protein
33958	Prodigal:2.6	CDS	571109	571807	.	-	0	ID=GNDLBLIP_00689;eC_number=6.5.1.2;Name=ligA_1;gene=ligA_1;inference=ab initio prediction:Prodigal:2.6,similar to AA sequence:UniProtKB:O87703;locus_tag=GNDLBLIP_00689;product=DNA ligase
33958	Prodigal:2.6	CDS	572022	572531	.	-	0	ID=GNDLBLIP_00690;eC_number=6.5.1.2;Name=ligA_2;gene=ligA_2;inference=ab initio prediction:Prodigal:2.6,similar to AA sequence:UniProtKB:C1CKI0;locus_tag=GNDLBLIP_00690;product=DNA ligase
33958	Prodigal:2.6	CDS	572528	573145	.	-	0	ID=GNDLBLIP_00691;eC_number=6.5.1.2;Name=ligA_3;dbxref=COG:COG0272;gene=ligA_3;inference=ab initio prediction:Prodigal:2.6,similar to AA sequence:UniProtKB:P15042;locus_tag=GNDLBLIP_00691;product=DNA ligase
33958	Prodigal:2.6	CDS	573188	574321	.	-	0	ID=GNDLBLIP_00692;inference=ab initio prediction:Prodigal:2.6;locus_tag=GNDLBLIP_00692;product=hypothetical protein
33958	Prodigal:2.6	CDS	574339	575643	.	-	0	ID=GNDLBLIP_00693;inference=ab initio prediction:Prodigal:2.6;locus_tag=GNDLBLIP_00693;product=hypothetical protein
33958	Prodigal:2.6	CDS	575769	576422	.	-	0	ID=GNDLBLIP_00694;inference=ab initio prediction:Prodigal:2.6;locus_tag=GNDLBLIP_00694;product=hypothetical protein
33958	Prodigal:2.6	CDS	576541	577104	.	-	0	ID=GNDLBLIP_00695;eC_number=3.1.1.-;Name=pnbA;dbxref=COG:COG2272;gene=pnbA;inference=ab initio prediction:Prodigal:2.6,similar to AA sequence:UniProtKB:P37967;locus_tag=GNDLBLIP_00695;product=Para-nitrobenzyl esterase
33958	Prodigal:2.6	CDS	577187	577699	.	+	0	ID=GNDLBLIP_00696;eC_number=3.1.31.1;Name=nuc;dbxref=COG:COG1525;gene=nuc;inference=ab initio prediction:Prodigal:2.6,similar to AA sequence:UniProtKB:P00644;locus_tag=GNDLBLIP_00696;product=Thermonuclease
33958	Prodigal:2.6	CDS	577952	578665	.	+	0	ID=GNDLBLIP_00697;eC_number=1.1.1.-;Name=gno;gene=gno;inference=ab initio prediction:Prodigal:2.6,similar to AA sequence:UniProtKB:P50199;locus_tag=GNDLBLIP_00697;product=Gluconate 5-dehydrogenase
33958	Prodigal:2.6	CDS	578733	579527	.	-	0	ID=GNDLBLIP_00698;eC_number=6.1.1.7;Name=alaS_1;dbxref=COG:COG0013;gene=alaS_1;inference=ab initio prediction:Prodigal:2.6,similar to AA sequence:UniProtKB:P00957;locus_tag=GNDLBLIP_00698;product=Alanine--tRNA ligase
33958	Prodigal:2.6	CDS	579728	580027	.	-	0	ID=GNDLBLIP_00699;eC_number=6.1.1.7;Name=alaS_2;dbxref=COG:COG0013;gene=alaS_2;inference=ab initio prediction:Prodigal:2.6,similar to AA sequence:UniProtKB:P00957;locus_tag=GNDLBLIP_00699;product=Alanine--tRNA ligase
33958	Prodigal:2.6	CDS	580092	580835	.	-	0	ID=GNDLBLIP_00700;eC_number=6.1.1.7;Name=alaS_3;dbxref=COG:COG0013;gene=alaS_3;inference=ab initio prediction:Prodigal:2.6,similar to AA sequence:UniProtKB:O67323;locus_tag=GNDLBLIP_00700;product=Alanine--tRNA ligase
33958	Prodigal:2.6	CDS	580790	581335	.	-	0	ID=GNDLBLIP_00701;eC_number=6.1.1.7;Name=alaS_4;dbxref=COG:COG0013;gene=alaS_4;inference=ab initio prediction:Prodigal:2.6,similar to AA sequence:UniProtKB:O67323;locus_tag=GNDLBLIP_00701;product=Alanine--tRNA ligase
33958	Prodigal:2.6	CDS	581548	582396	.	-	0	ID=GNDLBLIP_00702;inference=ab initio prediction:Prodigal:2.6;locus_tag=GNDLBLIP_00702;product=hypothetical protein
33958	Prodigal:2.6	CDS	582402	583115	.	-	0	ID=GNDLBLIP_00703;eC_number=3.6.3.-;Name=yxlF_1;dbxref=COG:COG1131;gene=yxlF_1;inference=ab initio prediction:Prodigal:2.6,similar to AA sequence:UniProtKB:P94374;locus_tag=GNDLBLIP_00703;product=putative ABC transporter ATP-binding protein YxlF
33958	Prodigal:2.6	CDS	583073	583291	.	-	0	ID=GNDLBLIP_00704;Name=ybhF_1;dbxref=COG:COG1131;gene=ybhF_1;inference=ab initio prediction:Prodigal:2.6,similar to AA sequence:UniProtKB:P0A9U1;locus_tag=GNDLBLIP_00704;product=putative multidrug ABC transporter ATP-binding protein YbhF
33958	Prodigal:2.6	CDS	583390	583707	.	+	0	ID=GNDLBLIP_00705;inference=ab initio prediction:Prodigal:2.6;locus_tag=GNDLBLIP_00705;product=hypothetical protein
33958	Prodigal:2.6	CDS	583659	584732	.	+	0	ID=GNDLBLIP_00706;eC_number=3.4.24.-;Name=ftsH_1;dbxref=COG:COG0465;gene=ftsH_1;inference=ab initio prediction:Prodigal:2.6,similar to AA sequence:UniProtKB:P9WQN3;locus_tag=GNDLBLIP_00706;product=ATP-dependent zinc metalloprotease FtsH
33958	Prodigal:2.6	CDS	584908	585474	.	-	0	ID=GNDLBLIP_00707;inference=ab initio prediction:Prodigal:2.6;locus_tag=GNDLBLIP_00707;product=hypothetical protein
33958	Prodigal:2.6	CDS	585652	586761	.	+	0	ID=GNDLBLIP_00708;Name=prfB_1;gene=prfB_1;inference=ab initio prediction:Prodigal:2.6,similar to AA sequence:UniProtKB:Q7A6R4;locus_tag=GNDLBLIP_00708;product=Peptide chain release factor 2
33958	Prodigal:2.6	CDS	586771	587247	.	+	0	ID=GNDLBLIP_00709;inference=ab initio prediction:Prodigal:2.6;locus_tag=GNDLBLIP_00709;product=hypothetical protein
33958	Prodigal:2.6	CDS	587341	588018	.	+	0	ID=GNDLBLIP_00710;Name=dedA;dbxref=COG:COG0586;gene=dedA;inference=ab initio prediction:Prodigal:2.6,similar to AA sequence:UniProtKB:P0ABP6;locus_tag=GNDLBLIP_00710;product=Protein DedA
33958	Prodigal:2.6	CDS	588114	590033	.	+	0	ID=GNDLBLIP_00711;eC_number=2.7.7.-;Name=dnaG;dbxref=COG:COG0358;gene=dnaG;inference=ab initio prediction:Prodigal:2.6,similar to AA sequence:UniProtKB:P05096;locus_tag=GNDLBLIP_00711;product=DNA primase
33958	Prodigal:2.6	CDS	590151	590591	.	+	0	ID=GNDLBLIP_00712;eC_number=3.4.21.92;Name=clpP_1;dbxref=COG:COG0740;gene=clpP_1;inference=ab initio prediction:Prodigal:2.6,similar to AA sequence:UniProtKB:P80244;locus_tag=GNDLBLIP_00712;product=ATP-dependent Clp protease proteolytic subunit
33958	Prodigal:2.6	CDS	590600	590785	.	+	0	ID=GNDLBLIP_00713;eC_number=3.4.21.92;Name=clpP_2;dbxref=COG:COG0740;gene=clpP_2;inference=ab initio prediction:Prodigal:2.6,similar to AA sequence:UniProtKB:P56156;locus_tag=GNDLBLIP_00713;product=ATP-dependent Clp protease proteolytic subunit
33958	Prodigal:2.6	CDS	590917	591183	.	+	0	ID=GNDLBLIP_00714;inference=ab initio prediction:Prodigal:2.6;locus_tag=GNDLBLIP_00714;product=hypothetical protein
33958	Prodigal:2.6	CDS	591184	591600	.	-	0	ID=GNDLBLIP_00715;Name=arnE;gene=arnE;inference=ab initio prediction:Prodigal:2.6,protein motif:HAMAP:MF_01869;locus_tag=GNDLBLIP_00715;product=4-amino-4-deoxy-L-arabinose-phosphoundecaprenol flippase subunit ArnE
33958	Prodigal:2.6	CDS	591619	592137	.	-	0	ID=GNDLBLIP_00716;inference=ab initio prediction:Prodigal:2.6;locus_tag=GNDLBLIP_00716;product=hypothetical protein
33958	Prodigal:2.6	CDS	592091	592318	.	-	0	ID=GNDLBLIP_00717;inference=ab initio prediction:Prodigal:2.6;locus_tag=GNDLBLIP_00717;product=hypothetical protein
33958	Prodigal:2.6	CDS	592478	592897	.	-	0	ID=GNDLBLIP_00718;eC_number=2.3.1.-;inference=ab initio prediction:Prodigal:2.6,similar to AA sequence:UniProtKB:Q7CXI0;locus_tag=GNDLBLIP_00718;product=Acetyltransferase
33958	Prodigal:2.6	CDS	593001	593630	.	+	0	ID=GNDLBLIP_00719;inference=ab initio prediction:Prodigal:2.6;locus_tag=GNDLBLIP_00719;product=hypothetical protein
33958	Prodigal:2.6	CDS	593684	593956	.	+	0	ID=GNDLBLIP_00720;inference=ab initio prediction:Prodigal:2.6;locus_tag=GNDLBLIP_00720;product=hypothetical protein
33958	Prodigal:2.6	CDS	594017	594895	.	-	0	ID=GNDLBLIP_00721;Name=yicL;dbxref=COG:COG0697;gene=yicL;inference=ab initio prediction:Prodigal:2.6,similar to AA sequence:UniProtKB:P31437;locus_tag=GNDLBLIP_00721;product=putative inner membrane transporter YicL
33958	Prodigal:2.6	CDS	595024	595113	.	+	0	ID=GNDLBLIP_00722;inference=ab initio prediction:Prodigal:2.6;locus_tag=GNDLBLIP_00722;product=hypothetical protein
33958	Prodigal:2.6	CDS	595152	595493	.	+	0	ID=GNDLBLIP_00723;Name=lrp_2;dbxref=COG:COG1522;gene=lrp_2;inference=ab initio prediction:Prodigal:2.6,similar to AA sequence:UniProtKB:P0ACJ0;locus_tag=GNDLBLIP_00723;product=Leucine-responsive regulatory protein
33958	Prodigal:2.6	CDS	595576	596436	.	-	0	ID=GNDLBLIP_00724;eC_number=2.5.1.15;Name=folP;dbxref=COG:COG0294;gene=folP;inference=ab initio prediction:Prodigal:2.6,similar to AA sequence:UniProtKB:P0AC13;locus_tag=GNDLBLIP_00724;product=Dihydropteroate synthase
33958	Prodigal:2.6	CDS	596490	597026	.	+	0	ID=GNDLBLIP_00725;inference=ab initio prediction:Prodigal:2.6;locus_tag=GNDLBLIP_00725;product=hypothetical protein
33958	Prodigal:2.6	CDS	597068	598153	.	+	0	ID=GNDLBLIP_00726;inference=ab initio prediction:Prodigal:2.6;locus_tag=GNDLBLIP_00726;product=hypothetical protein
33958	Prodigal:2.6	CDS	598205	598675	.	+	0	ID=GNDLBLIP_00727;inference=ab initio prediction:Prodigal:2.6;locus_tag=GNDLBLIP_00727;product=hypothetical protein
33958	Prodigal:2.6	CDS	598684	599673	.	+	0	ID=GNDLBLIP_00728;eC_number=3.4.11.6;Name=ywaD_1;dbxref=COG:COG2234;gene=ywaD_1;inference=ab initio prediction:Prodigal:2.6,similar to AA sequence:UniProtKB:P25152;locus_tag=GNDLBLIP_00728;product=Aminopeptidase YwaD
33958	Prodigal:2.6	CDS	599719	600072	.	+	0	ID=GNDLBLIP_00729;inference=ab initio prediction:Prodigal:2.6;locus_tag=GNDLBLIP_00729;product=hypothetical protein
33958	Prodigal:2.6	CDS	600106	600297	.	+	0	ID=GNDLBLIP_00730;inference=ab initio prediction:Prodigal:2.6;locus_tag=GNDLBLIP_00730;product=hypothetical protein
33958	Prodigal:2.6	CDS	600333	601736	.	+	0	ID=GNDLBLIP_00731;eC_number=3.4.14.-;Name=dapb1;gene=dapb1;inference=ab initio prediction:Prodigal:2.6,similar to AA sequence:UniProtKB:O07834;locus_tag=GNDLBLIP_00731;product=Dipeptidyl aminopeptidase BI
33958	Prodigal:2.6	CDS	601733	602230	.	+	0	ID=GNDLBLIP_00732;eC_number=3.4.21.83;Name=ptrB_1;dbxref=COG:COG1770;gene=ptrB_1;inference=ab initio prediction:Prodigal:2.6,similar to AA sequence:UniProtKB:P24555;locus_tag=GNDLBLIP_00732;product=Protease 2
33958	Prodigal:2.6	CDS	602253	603011	.	+	0	ID=GNDLBLIP_00733;eC_number=5.3.1.1;Name=tpiA;gene=tpiA;inference=ab initio prediction:Prodigal:2.6,similar to AA sequence:UniProtKB:Q8XKU1;locus_tag=GNDLBLIP_00733;product=Triosephosphate isomerase
33958	Prodigal:2.6	CDS	603048	603512	.	+	0	ID=GNDLBLIP_00734;eC_number=2.1.1.-;Name=prmA_1;dbxref=COG:COG2264;gene=prmA_1;inference=ab initio prediction:Prodigal:2.6,similar to AA sequence:UniProtKB:Q84BQ9;locus_tag=GNDLBLIP_00734;product=Ribosomal protein L11 methyltransferase
33958	Prodigal:2.6	CDS	603488	603874	.	+	0	ID=GNDLBLIP_00735;eC_number=2.1.1.-;Name=prmA_2;gene=prmA_2;inference=ab initio prediction:Prodigal:2.6,similar to AA sequence:UniProtKB:Q04AV7;locus_tag=GNDLBLIP_00735;product=Ribosomal protein L11 methyltransferase
33958	Prodigal:2.6	CDS	603936	604892	.	+	0	ID=GNDLBLIP_00736;inference=ab initio prediction:Prodigal:2.6;locus_tag=GNDLBLIP_00736;product=hypothetical protein
33958	Prodigal:2.6	CDS	604965	605684	.	-	0	ID=GNDLBLIP_00737;eC_number=3.4.24.-;Name=mepM_1;dbxref=COG:COG0739;gene=mepM_1;inference=ab initio prediction:Prodigal:2.6,similar to AA sequence:UniProtKB:P0AFS9;locus_tag=GNDLBLIP_00737;product=Murein DD-endopeptidase MepM
33958	Prodigal:2.6	CDS	605998	607008	.	+	0	ID=GNDLBLIP_00738;eC_number=1.1.1.94;Name=gpsA;gene=gpsA;inference=ab initio prediction:Prodigal:2.6,similar to AA sequence:UniProtKB:P64191;locus_tag=GNDLBLIP_00738;product=Glycerol-3-phosphate dehydrogenase [NAD(P)+]
33958	Prodigal:2.6	CDS	607037	608518	.	+	0	ID=GNDLBLIP_00739;eC_number=1.1.5.4;Name=mqo;dbxref=COG:COG0579;gene=mqo;inference=ab initio prediction:Prodigal:2.6,similar to AA sequence:UniProtKB:P33940;locus_tag=GNDLBLIP_00739;product=Malate:quinone oxidoreductase
33958	Prodigal:2.6	CDS	608518	608709	.	+	0	ID=GNDLBLIP_00740;inference=ab initio prediction:Prodigal:2.6;locus_tag=GNDLBLIP_00740;product=hypothetical protein
33958	Prodigal:2.6	CDS	608810	609115	.	+	0	ID=GNDLBLIP_00741;inference=ab initio prediction:Prodigal:2.6;locus_tag=GNDLBLIP_00741;product=hypothetical protein
33958	Prodigal:2.6	CDS	609240	610607	.	-	0	ID=GNDLBLIP_00742;Name=exuT;gene=exuT;inference=ab initio prediction:Prodigal:2.6,similar to AA sequence:UniProtKB:P0AA78;locus_tag=GNDLBLIP_00742;product=Hexuronate transporter
33958	Prodigal:2.6	CDS	610625	610927	.	-	0	ID=GNDLBLIP_00743;eC_number=5.3.1.17;Name=kduI_1;dbxref=COG:COG3717;gene=kduI_1;inference=ab initio prediction:Prodigal:2.6,similar to AA sequence:UniProtKB:Q05529;locus_tag=GNDLBLIP_00743;product=4-deoxy-L-threo-5-hexosulose-uronate ketol-isomerase
33958	Prodigal:2.6	CDS	611011	611454	.	-	0	ID=GNDLBLIP_00744;eC_number=5.3.1.17;Name=kduI_2;dbxref=COG:COG3717;gene=kduI_2;inference=ab initio prediction:Prodigal:2.6,similar to AA sequence:UniProtKB:Q05529;locus_tag=GNDLBLIP_00744;product=4-deoxy-L-threo-5-hexosulose-uronate ketol-isomerase
33958	Prodigal:2.6	CDS	611573	611941	.	-	0	ID=GNDLBLIP_00745;eC_number=1.1.1.127;Name=kduD_1;gene=kduD_1;inference=ab initio prediction:Prodigal:2.6,similar to AA sequence:UniProtKB:Q05528;locus_tag=GNDLBLIP_00745;product=2-dehydro-3-deoxy-D-gluconate 5-dehydrogenase
33958	Prodigal:2.6	CDS	611938	612336	.	-	0	ID=GNDLBLIP_00746;eC_number=1.1.1.127;Name=kduD_2;gene=kduD_2;inference=ab initio prediction:Prodigal:2.6,similar to AA sequence:UniProtKB:P37769;locus_tag=GNDLBLIP_00746;product=2-dehydro-3-deoxy-D-gluconate 5-dehydrogenase
33958	Prodigal:2.6	CDS	612521	613009	.	+	0	ID=GNDLBLIP_00747;inference=ab initio prediction:Prodigal:2.6;locus_tag=GNDLBLIP_00747;product=hypothetical protein
33958	Prodigal:2.6	CDS	613115	613591	.	+	0	ID=GNDLBLIP_00748;inference=ab initio prediction:Prodigal:2.6;locus_tag=GNDLBLIP_00748;product=hypothetical protein
33958	Prodigal:2.6	CDS	613588	614934	.	-	0	ID=GNDLBLIP_00749;eC_number=2.8.4.5;Name=mtaB;dbxref=COG:COG0621;gene=mtaB;inference=ab initio prediction:Prodigal:2.6,similar to AA sequence:UniProtKB:P54462;locus_tag=GNDLBLIP_00749;product=Threonylcarbamoyladenosine tRNA methylthiotransferase MtaB
33958	Prodigal:2.6	CDS	615348	615635	.	+	0	ID=GNDLBLIP_00750;eC_number=2.7.7.12;Name=galT_1;dbxref=COG:COG1085;gene=galT_1;inference=ab initio prediction:Prodigal:2.6,similar to AA sequence:UniProtKB:P09148;locus_tag=GNDLBLIP_00750;product=Galactose-1-phosphate uridylyltransferase
33958	Prodigal:2.6	CDS	615704	616387	.	+	0	ID=GNDLBLIP_00751;eC_number=2.7.7.12;Name=galT_2;dbxref=COG:COG1085;gene=galT_2;inference=ab initio prediction:Prodigal:2.6,similar to AA sequence:UniProtKB:P09148;locus_tag=GNDLBLIP_00751;product=Galactose-1-phosphate uridylyltransferase
33958	Prodigal:2.6	CDS	616390	617550	.	+	0	ID=GNDLBLIP_00752;eC_number=2.7.1.6;Name=galK;dbxref=COG:COG0153;gene=galK;inference=ab initio prediction:Prodigal:2.6,similar to AA sequence:UniProtKB:P0A6T3;locus_tag=GNDLBLIP_00752;product=Galactokinase
33958	Prodigal:2.6	CDS	617557	618012	.	+	0	ID=GNDLBLIP_00753;eC_number=5.1.3.3;Name=galM;dbxref=COG:COG2017;gene=galM;inference=ab initio prediction:Prodigal:2.6,similar to AA sequence:UniProtKB:P0A9C3;locus_tag=GNDLBLIP_00753;product=Aldose 1-epimerase
33958	Prodigal:2.6	CDS	618254	618625	.	+	0	ID=GNDLBLIP_00754;eC_number=5.1.3.3;Name=mro;dbxref=COG:COG2017;gene=mro;inference=ab initio prediction:Prodigal:2.6,similar to AA sequence:UniProtKB:P05149;locus_tag=GNDLBLIP_00754;product=Aldose 1-epimerase
33958	Prodigal:2.6	CDS	618764	618970	.	+	0	ID=GNDLBLIP_00755;inference=ab initio prediction:Prodigal:2.6;locus_tag=GNDLBLIP_00755;product=hypothetical protein
33958	Prodigal:2.6	CDS	619080	619505	.	-	0	ID=GNDLBLIP_00756;inference=ab initio prediction:Prodigal:2.6;locus_tag=GNDLBLIP_00756;product=hypothetical protein
33958	Prodigal:2.6	CDS	619620	621284	.	+	0	ID=GNDLBLIP_00757;eC_number=2.4.1.1;Name=glgP;dbxref=COG:COG0058;gene=glgP;inference=ab initio prediction:Prodigal:2.6,similar to AA sequence:UniProtKB:P9WMW1;locus_tag=GNDLBLIP_00757;product=Glycogen phosphorylase
33958	Prodigal:2.6	CDS	621356	623326	.	-	0	ID=GNDLBLIP_00758;eC_number=6.3.1.2;Name=glnA;gene=glnA;inference=ab initio prediction:Prodigal:2.6,similar to AA sequence:UniProtKB:P15623;locus_tag=GNDLBLIP_00758;product=Glutamine synthetase
33958	Prodigal:2.6	CDS	623335	623577	.	-	0	ID=GNDLBLIP_00759;inference=ab initio prediction:Prodigal:2.6;locus_tag=GNDLBLIP_00759;product=hypothetical protein
33958	Prodigal:2.6	CDS	623833	624249	.	+	0	ID=GNDLBLIP_00760;inference=ab initio prediction:Prodigal:2.6;locus_tag=GNDLBLIP_00760;product=hypothetical protein
33958	Prodigal:2.6	CDS	624260	625603	.	-	0	ID=GNDLBLIP_00761;Name=umuC_1;dbxref=COG:COG0389;gene=umuC_1;inference=ab initio prediction:Prodigal:2.6,similar to AA sequence:UniProtKB:P04152;locus_tag=GNDLBLIP_00761;product=Protein UmuC
33958	Prodigal:2.6	CDS	625837	626364	.	-	0	ID=GNDLBLIP_00762;Name=glcR;dbxref=COG:COG1349;gene=glcR;inference=ab initio prediction:Prodigal:2.6,similar to AA sequence:UniProtKB:P94591;locus_tag=GNDLBLIP_00762;product=HTH-type transcriptional repressor GlcR
33958	Prodigal:2.6	CDS	626322	626507	.	-	0	ID=GNDLBLIP_00763;inference=ab initio prediction:Prodigal:2.6;locus_tag=GNDLBLIP_00763;product=hypothetical protein
33958	Prodigal:2.6	CDS	626706	627278	.	+	0	ID=GNDLBLIP_00764;eC_number=3.1.3.-;dbxref=COG:COG4502;inference=ab initio prediction:Prodigal:2.6,similar to AA sequence:UniProtKB:Q8CTG7;locus_tag=GNDLBLIP_00764;product=Putative 5'(3')-deoxyribonucleotidase
33958	Prodigal:2.6	CDS	627289	628143	.	-	0	ID=GNDLBLIP_00765;Name=ybjJ_1;gene=ybjJ_1;inference=ab initio prediction:Prodigal:2.6,similar to AA sequence:UniProtKB:P75810;locus_tag=GNDLBLIP_00765;product=Inner membrane protein YbjJ
33958	Prodigal:2.6	CDS	628197	628475	.	-	0	ID=GNDLBLIP_00766;inference=ab initio prediction:Prodigal:2.6;locus_tag=GNDLBLIP_00766;product=hypothetical protein
33958	Prodigal:2.6	CDS	628664	629026	.	-	0	ID=GNDLBLIP_00767;inference=ab initio prediction:Prodigal:2.6;locus_tag=GNDLBLIP_00767;product=hypothetical protein
33958	Prodigal:2.6	CDS	629239	629973	.	-	0	ID=GNDLBLIP_00768;inference=ab initio prediction:Prodigal:2.6;locus_tag=GNDLBLIP_00768;product=hypothetical protein
33958	Prodigal:2.6	CDS	630081	630461	.	-	0	ID=GNDLBLIP_00769;inference=ab initio prediction:Prodigal:2.6;locus_tag=GNDLBLIP_00769;product=hypothetical protein
33958	Prodigal:2.6	CDS	630632	631768	.	+	0	ID=GNDLBLIP_00770;eC_number=2.3.1.-;Name=wecH;gene=wecH;inference=ab initio prediction:Prodigal:2.6,protein motif:HAMAP:MF_01949;locus_tag=GNDLBLIP_00770;product=O-acetyltransferase WecH
33958	Prodigal:2.6	CDS	631837	632679	.	+	0	ID=GNDLBLIP_00771;eC_number=3.2.1.52;Name=exoI_1;dbxref=COG:COG3525;gene=exoI_1;inference=ab initio prediction:Prodigal:2.6,similar to AA sequence:UniProtKB:P96155;locus_tag=GNDLBLIP_00771;product=Beta-hexosaminidase
33958	Prodigal:2.6	CDS	632679	634082	.	+	0	ID=GNDLBLIP_00772;eC_number=3.2.1.52;Name=exoI_2;dbxref=COG:COG3525;gene=exoI_2;inference=ab initio prediction:Prodigal:2.6,similar to AA sequence:UniProtKB:P96155;locus_tag=GNDLBLIP_00772;product=Beta-hexosaminidase
33958	Prodigal:2.6	CDS	634149	634484	.	-	0	ID=GNDLBLIP_00773;Name=ttgC;gene=ttgC;inference=ab initio prediction:Prodigal:2.6,similar to AA sequence:UniProtKB:Q9WWZ8;locus_tag=GNDLBLIP_00773;product=Toluene efflux pump outer membrane protein TtgC
33958	Prodigal:2.6	CDS	634475	634807	.	-	0	ID=GNDLBLIP_00774;Name=srpC_2;gene=srpC_2;inference=ab initio prediction:Prodigal:2.6,similar to AA sequence:UniProtKB:O31101;locus_tag=GNDLBLIP_00774;product=Solvent efflux pump outer membrane protein SrpC
33958	Prodigal:2.6	CDS	634774	635547	.	-	0	ID=GNDLBLIP_00775;inference=ab initio prediction:Prodigal:2.6;locus_tag=GNDLBLIP_00775;product=hypothetical protein
33958	Prodigal:2.6	CDS	635549	636706	.	-	0	ID=GNDLBLIP_00776;Name=yibH;dbxref=COG:COG1566;gene=yibH;inference=ab initio prediction:Prodigal:2.6,similar to AA sequence:UniProtKB:P0AFV0;locus_tag=GNDLBLIP_00776;product=Inner membrane protein YibH
33958	Prodigal:2.6	CDS	636709	637038	.	-	0	ID=GNDLBLIP_00777;inference=ab initio prediction:Prodigal:2.6;locus_tag=GNDLBLIP_00777;product=hypothetical protein
33958	Prodigal:2.6	CDS	638261	638941	.	+	0	ID=GNDLBLIP_00778;eC_number=3.5.1.26;inference=ab initio prediction:Prodigal:2.6,similar to AA sequence:UniProtKB:Q47898;locus_tag=GNDLBLIP_00778;product=N(4)-(Beta-N-acetylglucosaminyl)-L-asparaginase
33958	Prodigal:2.6	CDS	638964	639326	.	+	0	ID=GNDLBLIP_00779;inference=ab initio prediction:Prodigal:2.6;locus_tag=GNDLBLIP_00779;product=hypothetical protein
33958	Prodigal:2.6	CDS	639536	640198	.	+	0	ID=GNDLBLIP_00780;Name=cutC;dbxref=COG:COG3142;gene=cutC;inference=ab initio prediction:Prodigal:2.6,similar to AA sequence:UniProtKB:P67825;locus_tag=GNDLBLIP_00780;product=Copper homeostasis protein CutC
33958	Prodigal:2.6	CDS	640202	640822	.	+	0	ID=GNDLBLIP_00781;inference=ab initio prediction:Prodigal:2.6;locus_tag=GNDLBLIP_00781;product=hypothetical protein
33958	Prodigal:2.6	CDS	641044	642264	.	+	0	ID=GNDLBLIP_00782;Name=pbpE_3;dbxref=COG:COG1680;gene=pbpE_3;inference=ab initio prediction:Prodigal:2.6,similar to AA sequence:UniProtKB:P32959;locus_tag=GNDLBLIP_00782;product=Penicillin-binding protein 4*
33958	Prodigal:2.6	CDS	642761	643210	.	+	0	ID=GNDLBLIP_00783;inference=ab initio prediction:Prodigal:2.6;locus_tag=GNDLBLIP_00783;product=hypothetical protein
33958	Prodigal:2.6	CDS	643287	645263	.	+	0	ID=GNDLBLIP_00784;eC_number=3.2.1.23;Name=lacZ_1;gene=lacZ_1;inference=ab initio prediction:Prodigal:2.6,similar to AA sequence:UniProtKB:A3FEW8;locus_tag=GNDLBLIP_00784;product=Beta-galactosidase
33958	Prodigal:2.6	CDS	645570	646478	.	+	0	ID=GNDLBLIP_00785;inference=ab initio prediction:Prodigal:2.6;locus_tag=GNDLBLIP_00785;product=hypothetical protein
33958	Prodigal:2.6	CDS	646727	648115	.	-	0	ID=GNDLBLIP_00786;inference=ab initio prediction:Prodigal:2.6;locus_tag=GNDLBLIP_00786;product=hypothetical protein
33958	Prodigal:2.6	CDS	648297	650411	.	+	0	ID=GNDLBLIP_00787;eC_number=3.4.14.12;Name=ptpA_1;dbxref=COG:COG1506;gene=ptpA_1;inference=ab initio prediction:Prodigal:2.6,similar to AA sequence:UniProtKB:Q7MUW6;locus_tag=GNDLBLIP_00787;product=Prolyl tripeptidyl peptidase
33958	Prodigal:2.6	CDS	650555	650737	.	+	0	ID=GNDLBLIP_00788;Name=dtpB;gene=dtpB;inference=ab initio prediction:Prodigal:2.6,protein motif:HAMAP:MF_01879;locus_tag=GNDLBLIP_00788;product=Dipeptide and tripeptide permease B
33958	Prodigal:2.6	CDS	650822	652213	.	+	0	ID=GNDLBLIP_00789;Name=dtpD;dbxref=COG:COG3104;gene=dtpD;inference=ab initio prediction:Prodigal:2.6,similar to AA sequence:UniProtKB:P75742;locus_tag=GNDLBLIP_00789;product=Dipeptide permease D
33958	Prodigal:2.6	CDS	652393	654102	.	+	0	ID=GNDLBLIP_00790;Name=dtpT_1;dbxref=COG:COG3104;gene=dtpT_1;inference=ab initio prediction:Prodigal:2.6,similar to AA sequence:UniProtKB:P0C2U3;locus_tag=GNDLBLIP_00790;product=Di-/tripeptide transporter
33958	Prodigal:2.6	CDS	654346	655746	.	+	0	ID=GNDLBLIP_00791;Name=dtpT_2;dbxref=COG:COG3104;gene=dtpT_2;inference=ab initio prediction:Prodigal:2.6,similar to AA sequence:UniProtKB:P0C2U3;locus_tag=GNDLBLIP_00791;product=Di-/tripeptide transporter
33958	Prodigal:2.6	CDS	655779	656312	.	+	0	ID=GNDLBLIP_00792;eC_number=1.8.1.8;Name=dsbD_2;gene=dsbD_2;inference=ab initio prediction:Prodigal:2.6,protein motif:HAMAP:MF_00399;locus_tag=GNDLBLIP_00792;product=Thiol:disulfide interchange protein DsbD
33958	Prodigal:2.6	CDS	656546	659176	.	+	0	ID=GNDLBLIP_00793;Name=cirA_1;dbxref=COG:COG4771;gene=cirA_1;inference=ab initio prediction:Prodigal:2.6,similar to AA sequence:UniProtKB:P17315;locus_tag=GNDLBLIP_00793;product=Colicin I receptor
33958	Prodigal:2.6	CDS	659652	660107	.	-	0	ID=GNDLBLIP_00794;inference=ab initio prediction:Prodigal:2.6;locus_tag=GNDLBLIP_00794;product=hypothetical protein
33958	Prodigal:2.6	CDS	660205	661515	.	-	0	ID=GNDLBLIP_00795;Name=cca;dbxref=COG:COG0617;gene=cca;inference=ab initio prediction:Prodigal:2.6,similar to AA sequence:UniProtKB:P06961;locus_tag=GNDLBLIP_00795;product=Multifunctional CCA protein
33958	Prodigal:2.6	CDS	661828	662193	.	-	0	ID=GNDLBLIP_00796;eC_number=2.7.7.87;Name=tsaC;dbxref=COG:COG0009;gene=tsaC;inference=ab initio prediction:Prodigal:2.6,similar to AA sequence:UniProtKB:P44807;locus_tag=GNDLBLIP_00796;product=Threonylcarbamoyl-AMP synthase
33958	Prodigal:2.6	CDS	662264	663412	.	-	0	ID=GNDLBLIP_00797;eC_number=4.4.1.8;Name=metC;dbxref=COG:COG0626;gene=metC;inference=ab initio prediction:Prodigal:2.6,similar to AA sequence:UniProtKB:Q83A83;locus_tag=GNDLBLIP_00797;product=Cystathionine beta-lyase
33958	Prodigal:2.6	CDS	663426	663962	.	-	0	ID=GNDLBLIP_00798;inference=ab initio prediction:Prodigal:2.6;locus_tag=GNDLBLIP_00798;product=hypothetical protein
33958	Prodigal:2.6	CDS	663991	664317	.	-	0	ID=GNDLBLIP_00799;inference=ab initio prediction:Prodigal:2.6;locus_tag=GNDLBLIP_00799;product=hypothetical protein
33958	Prodigal:2.6	CDS	664497	664841	.	+	0	ID=GNDLBLIP_00800;inference=ab initio prediction:Prodigal:2.6;locus_tag=GNDLBLIP_00800;product=hypothetical protein
33958	Prodigal:2.6	CDS	664796	665026	.	+	0	ID=GNDLBLIP_00801;inference=ab initio prediction:Prodigal:2.6;locus_tag=GNDLBLIP_00801;product=hypothetical protein
33958	Prodigal:2.6	CDS	665034	665825	.	+	0	ID=GNDLBLIP_00802;eC_number=6.3.1.5;Name=nadE;dbxref=COG:COG0171;gene=nadE;inference=ab initio prediction:Prodigal:2.6,similar to AA sequence:UniProtKB:Q81RP3;locus_tag=GNDLBLIP_00802;product=NH(3)-dependent NAD(+) synthetase
33958	Prodigal:2.6	CDS	665897	666286	.	+	0	ID=GNDLBLIP_00803;inference=ab initio prediction:Prodigal:2.6;locus_tag=GNDLBLIP_00803;product=hypothetical protein
33958	Prodigal:2.6	CDS	666401	666688	.	+	0	ID=GNDLBLIP_00804;dbxref=COG:COG2732;inference=ab initio prediction:Prodigal:2.6,similar to AA sequence:UniProtKB:P11540;locus_tag=GNDLBLIP_00804;product=Barstar
33958	Prodigal:2.6	CDS	666940	667719	.	-	0	ID=GNDLBLIP_00805;inference=ab initio prediction:Prodigal:2.6;locus_tag=GNDLBLIP_00805;product=hypothetical protein
33958	Prodigal:2.6	CDS	667788	668009	.	-	0	ID=GNDLBLIP_00806;inference=ab initio prediction:Prodigal:2.6;locus_tag=GNDLBLIP_00806;product=hypothetical protein
33958	Prodigal:2.6	CDS	668033	670615	.	-	0	ID=GNDLBLIP_00807;inference=ab initio prediction:Prodigal:2.6;locus_tag=GNDLBLIP_00807;product=hypothetical protein
33958	Prodigal:2.6	CDS	670817	671494	.	+	0	ID=GNDLBLIP_00808;Name=walR;dbxref=COG:COG0745;gene=walR;inference=ab initio prediction:Prodigal:2.6,similar to AA sequence:UniProtKB:P37478;locus_tag=GNDLBLIP_00808;product=Transcriptional regulatory protein WalR
33958	Prodigal:2.6	CDS	671504	672532	.	+	0	ID=GNDLBLIP_00809;eC_number=2.7.13.3;Name=phoR;dbxref=COG:COG0642;gene=phoR;inference=ab initio prediction:Prodigal:2.6,similar to AA sequence:UniProtKB:P23545;locus_tag=GNDLBLIP_00809;product=Alkaline phosphatase synthesis sensor protein PhoR
33958	Prodigal:2.6	CDS	672660	673238	.	+	0	ID=GNDLBLIP_00810;inference=ab initio prediction:Prodigal:2.6;locus_tag=GNDLBLIP_00810;product=hypothetical protein
33958	Prodigal:2.6	CDS	673365	674648	.	+	0	ID=GNDLBLIP_00811;eC_number=3.2.1.1;Name=amyB;gene=amyB;inference=ab initio prediction:Prodigal:2.6,similar to AA sequence:UniProtKB:P14898;locus_tag=GNDLBLIP_00811;product=Alpha-amylase 2
33958	Prodigal:2.6	CDS	674665	675015	.	+	0	ID=GNDLBLIP_00812;inference=ab initio prediction:Prodigal:2.6;locus_tag=GNDLBLIP_00812;product=hypothetical protein
33958	Prodigal:2.6	CDS	675012	675854	.	+	0	ID=GNDLBLIP_00813;inference=ab initio prediction:Prodigal:2.6;locus_tag=GNDLBLIP_00813;product=hypothetical protein
33958	Prodigal:2.6	CDS	675858	676148	.	-	0	ID=GNDLBLIP_00814;inference=ab initio prediction:Prodigal:2.6;locus_tag=GNDLBLIP_00814;product=hypothetical protein
33958	Prodigal:2.6	CDS	676112	676918	.	-	0	ID=GNDLBLIP_00815;Name=pbpE_4;dbxref=COG:COG1680;gene=pbpE_4;inference=ab initio prediction:Prodigal:2.6,similar to AA sequence:UniProtKB:P32959;locus_tag=GNDLBLIP_00815;product=Penicillin-binding protein 4*
33958	Prodigal:2.6	CDS	677003	677563	.	-	0	ID=GNDLBLIP_00816;inference=ab initio prediction:Prodigal:2.6;locus_tag=GNDLBLIP_00816;product=hypothetical protein
33958	Prodigal:2.6	CDS	677755	677958	.	-	0	ID=GNDLBLIP_00817;inference=ab initio prediction:Prodigal:2.6;locus_tag=GNDLBLIP_00817;product=hypothetical protein
33958	Prodigal:2.6	CDS	677955	679880	.	-	0	ID=GNDLBLIP_00818;inference=ab initio prediction:Prodigal:2.6;locus_tag=GNDLBLIP_00818;product=hypothetical protein
33958	Prodigal:2.6	CDS	679882	680514	.	-	0	ID=GNDLBLIP_00819;eC_number=3.1.1.1;Name=estB_2;dbxref=COG:COG0400;gene=estB_2;inference=ab initio prediction:Prodigal:2.6,similar to AA sequence:UniProtKB:Q53547;locus_tag=GNDLBLIP_00819;product=Carboxylesterase 2
33958	Prodigal:2.6	CDS	680713	681663	.	+	0	ID=GNDLBLIP_00820;inference=ab initio prediction:Prodigal:2.6;locus_tag=GNDLBLIP_00820;product=hypothetical protein
33958	Prodigal:2.6	CDS	681808	682674	.	+	0	ID=GNDLBLIP_00821;eC_number=6.3.3.5;Name=dcsG;gene=dcsG;inference=ab initio prediction:Prodigal:2.6,similar to AA sequence:UniProtKB:D2Z030;locus_tag=GNDLBLIP_00821;product=Cycloserine biosynthesis protein DcsG
33958	Prodigal:2.6	CDS	682741	683382	.	-	0	ID=GNDLBLIP_00822;inference=ab initio prediction:Prodigal:2.6;locus_tag=GNDLBLIP_00822;product=hypothetical protein
33958	Prodigal:2.6	CDS	683518	683796	.	-	0	ID=GNDLBLIP_00823;eC_number=6.1.1.1;Name=tyrS_1;gene=tyrS_1;inference=ab initio prediction:Prodigal:2.6,protein motif:HAMAP:MF_02006;locus_tag=GNDLBLIP_00823;product=Tyrosine--tRNA ligase
33958	Prodigal:2.6	CDS	683952	684800	.	-	0	ID=GNDLBLIP_00824;eC_number=6.1.1.1;Name=tyrS_2;gene=tyrS_2;inference=ab initio prediction:Prodigal:2.6,similar to AA sequence:UniProtKB:P00952;locus_tag=GNDLBLIP_00824;product=Tyrosine--tRNA ligase
33958	Prodigal:2.6	CDS	684902	686215	.	-	0	ID=GNDLBLIP_00825;inference=ab initio prediction:Prodigal:2.6;locus_tag=GNDLBLIP_00825;product=hypothetical protein
33958	Prodigal:2.6	CDS	686301	686453	.	+	0	ID=GNDLBLIP_00826;inference=ab initio prediction:Prodigal:2.6;locus_tag=GNDLBLIP_00826;product=hypothetical protein
33958	Prodigal:2.6	CDS	686407	686967	.	+	0	ID=GNDLBLIP_00827;Name=sigW_2;dbxref=COG:COG1595;gene=sigW_2;inference=ab initio prediction:Prodigal:2.6,similar to AA sequence:UniProtKB:Q45585;locus_tag=GNDLBLIP_00827;product=ECF RNA polymerase sigma factor SigW
33958	Prodigal:2.6	CDS	686960	687832	.	+	0	ID=GNDLBLIP_00828;eC_number=2.8.1.8;Name=lipA;dbxref=COG:COG0320;gene=lipA;inference=ab initio prediction:Prodigal:2.6,similar to AA sequence:UniProtKB:O32129;locus_tag=GNDLBLIP_00828;product=Lipoyl synthase
33958	Prodigal:2.6	CDS	688243	689799	.	+	0	ID=GNDLBLIP_00829;inference=ab initio prediction:Prodigal:2.6;locus_tag=GNDLBLIP_00829;product=hypothetical protein
33958	Prodigal:2.6	CDS	689842	691410	.	+	0	ID=GNDLBLIP_00830;inference=ab initio prediction:Prodigal:2.6;locus_tag=GNDLBLIP_00830;product=hypothetical protein
33958	Prodigal:2.6	CDS	691428	692426	.	+	0	ID=GNDLBLIP_00831;Name=ycf3_1;gene=ycf3_1;inference=ab initio prediction:Prodigal:2.6,protein motif:HAMAP:MF_00439;locus_tag=GNDLBLIP_00831;product=Photosystem I assembly protein Ycf3
33958	Prodigal:2.6	CDS	692423	692965	.	+	0	ID=GNDLBLIP_00832;inference=ab initio prediction:Prodigal:2.6;locus_tag=GNDLBLIP_00832;product=hypothetical protein
33958	Prodigal:2.6	CDS	693426	693599	.	+	0	ID=GNDLBLIP_00833;inference=ab initio prediction:Prodigal:2.6;locus_tag=GNDLBLIP_00833;product=hypothetical protein
33958	Prodigal:2.6	CDS	693652	695238	.	+	0	ID=GNDLBLIP_00834;inference=ab initio prediction:Prodigal:2.6;locus_tag=GNDLBLIP_00834;product=hypothetical protein
33958	Prodigal:2.6	CDS	695454	696293	.	+	0	ID=GNDLBLIP_00835;eC_number=3.1.1.45;Name=clcD;gene=clcD;inference=ab initio prediction:Prodigal:2.6,similar to AA sequence:UniProtKB:P0A115;locus_tag=GNDLBLIP_00835;product=Carboxymethylenebutenolidase
33958	Prodigal:2.6	CDS	696290	696451	.	+	0	ID=GNDLBLIP_00836;inference=ab initio prediction:Prodigal:2.6;locus_tag=GNDLBLIP_00836;product=hypothetical protein
33958	Prodigal:2.6	CDS	696598	697536	.	+	0	ID=GNDLBLIP_00837;eC_number=3.5.1.42;Name=pncC;dbxref=COG:COG1058;gene=pncC;inference=ab initio prediction:Prodigal:2.6,similar to AA sequence:UniProtKB:Q8EK32;locus_tag=GNDLBLIP_00837;product=Nicotinamide-nucleotide amidohydrolase PncC
33958	Prodigal:2.6	CDS	697634	697870	.	-	0	ID=GNDLBLIP_00838;inference=ab initio prediction:Prodigal:2.6;locus_tag=GNDLBLIP_00838;product=hypothetical protein
33958	Prodigal:2.6	CDS	698002	698160	.	-	0	ID=GNDLBLIP_00839;inference=ab initio prediction:Prodigal:2.6;locus_tag=GNDLBLIP_00839;product=hypothetical protein
33958	Prodigal:2.6	CDS	698572	699279	.	+	0	ID=GNDLBLIP_00840;inference=ab initio prediction:Prodigal:2.6;locus_tag=GNDLBLIP_00840;product=hypothetical protein
33958	Prodigal:2.6	CDS	699431	701494	.	+	0	ID=GNDLBLIP_00841;eC_number=3.4.24.-;Name=pepO_1;dbxref=COG:COG3590;gene=pepO_1;inference=ab initio prediction:Prodigal:2.6,similar to AA sequence:UniProtKB:Q07744;locus_tag=GNDLBLIP_00841;product=Neutral endopeptidase
33958	Prodigal:2.6	CDS	701602	702852	.	+	0	ID=GNDLBLIP_00842;inference=ab initio prediction:Prodigal:2.6;locus_tag=GNDLBLIP_00842;product=hypothetical protein
33958	Prodigal:2.6	CDS	702981	703523	.	+	0	ID=GNDLBLIP_00843;inference=ab initio prediction:Prodigal:2.6;locus_tag=GNDLBLIP_00843;product=hypothetical protein
33958	Prodigal:2.6	CDS	703597	705669	.	+	0	ID=GNDLBLIP_00844;eC_number=3.4.24.-;Name=pepO_2;dbxref=COG:COG3590;gene=pepO_2;inference=ab initio prediction:Prodigal:2.6,similar to AA sequence:UniProtKB:Q07744;locus_tag=GNDLBLIP_00844;product=Neutral endopeptidase
33958	Prodigal:2.6	CDS	705762	706604	.	+	0	ID=GNDLBLIP_00845;dbxref=COG:COG1073;inference=ab initio prediction:Prodigal:2.6,similar to AA sequence:UniProtKB:Q01609;locus_tag=GNDLBLIP_00845;product=putative protein
33958	Prodigal:2.6	CDS	706684	707589	.	-	0	ID=GNDLBLIP_00846;eC_number=3.4.11.10;inference=ab initio prediction:Prodigal:2.6,similar to AA sequence:UniProtKB:Q01693;locus_tag=GNDLBLIP_00846;product=Bacterial leucyl aminopeptidase
33958	Prodigal:2.6	CDS	707591	708415	.	-	0	ID=GNDLBLIP_00847;inference=ab initio prediction:Prodigal:2.6;locus_tag=GNDLBLIP_00847;product=hypothetical protein
33958	Prodigal:2.6	CDS	708441	708815	.	-	0	ID=GNDLBLIP_00848;inference=ab initio prediction:Prodigal:2.6;locus_tag=GNDLBLIP_00848;product=hypothetical protein
33958	Prodigal:2.6	CDS	708872	710119	.	-	0	ID=GNDLBLIP_00849;inference=ab initio prediction:Prodigal:2.6;locus_tag=GNDLBLIP_00849;product=hypothetical protein
33958	Prodigal:2.6	CDS	710215	710706	.	-	0	ID=GNDLBLIP_00850;inference=ab initio prediction:Prodigal:2.6;locus_tag=GNDLBLIP_00850;product=hypothetical protein
33958	Prodigal:2.6	CDS	710873	711877	.	-	0	ID=GNDLBLIP_00851;eC_number=1.13.11.27;Name=hpd;dbxref=COG:COG3185;gene=hpd;inference=ab initio prediction:Prodigal:2.6,similar to AA sequence:UniProtKB:Q53586;locus_tag=GNDLBLIP_00851;product=4-hydroxyphenylpyruvate dioxygenase
33958	Prodigal:2.6	CDS	711940	713214	.	-	0	ID=GNDLBLIP_00852;eC_number=2.8.3.-;dbxref=COG:COG0427;inference=ab initio prediction:Prodigal:2.6,similar to AA sequence:UniProtKB:Q0AVM5;locus_tag=GNDLBLIP_00852;product=Butanoate coenzyme A-transferase
33958	Prodigal:2.6	CDS	713239	713541	.	-	0	ID=GNDLBLIP_00853;inference=ab initio prediction:Prodigal:2.6;locus_tag=GNDLBLIP_00853;product=hypothetical protein
33958	Prodigal:2.6	CDS	713562	714392	.	-	0	ID=GNDLBLIP_00854;inference=ab initio prediction:Prodigal:2.6;locus_tag=GNDLBLIP_00854;product=hypothetical protein
33958	Prodigal:2.6	CDS	714675	715121	.	+	0	ID=GNDLBLIP_00855;inference=ab initio prediction:Prodigal:2.6;locus_tag=GNDLBLIP_00855;product=hypothetical protein
33958	Prodigal:2.6	CDS	715274	715525	.	+	0	ID=GNDLBLIP_00856;Name=parD1;dbxref=COG:COG3609;gene=parD1;inference=ab initio prediction:Prodigal:2.6,similar to AA sequence:UniProtKB:P58091;locus_tag=GNDLBLIP_00856;product=Antitoxin ParD1
33958	Prodigal:2.6	CDS	715518	715808	.	+	0	ID=GNDLBLIP_00857;Name=parE1;dbxref=COG:COG3668;gene=parE1;inference=ab initio prediction:Prodigal:2.6,similar to AA sequence:UniProtKB:P9WHG7;locus_tag=GNDLBLIP_00857;product=Toxin ParE1
33958	Prodigal:2.6	CDS	715868	717205	.	-	0	ID=GNDLBLIP_00858;eC_number=6.3.2.45;Name=mpl;dbxref=COG:COG0773;gene=mpl;inference=ab initio prediction:Prodigal:2.6,similar to AA sequence:UniProtKB:P37773;locus_tag=GNDLBLIP_00858;product=UDP-N-acetylmuramate--L-alanyl-gamma-D-glutamyl-meso-2%2C6-diaminoheptandioate ligase
33958	Prodigal:2.6	CDS	717430	718725	.	-	0	ID=GNDLBLIP_00859;eC_number=3.6.1.-;Name=nudL;gene=nudL;inference=ab initio prediction:Prodigal:2.6,protein motif:HAMAP:MF_01592;locus_tag=GNDLBLIP_00859;product=putative Nudix hydrolase NudL
33958	Prodigal:2.6	CDS	718931	720328	.	-	0	ID=GNDLBLIP_00860;eC_number=2.7.8.-;Name=clsA;dbxref=COG:COG1502;gene=clsA;inference=ab initio prediction:Prodigal:2.6,similar to AA sequence:UniProtKB:P71040;locus_tag=GNDLBLIP_00860;product=Major cardiolipin synthase ClsA
33958	Prodigal:2.6	CDS	720423	720995	.	+	0	ID=GNDLBLIP_00861;inference=ab initio prediction:Prodigal:2.6;locus_tag=GNDLBLIP_00861;product=hypothetical protein
33958	Prodigal:2.6	CDS	721000	721413	.	+	0	ID=GNDLBLIP_00862;Name=yqiK;dbxref=COG:COG2268;gene=yqiK;inference=ab initio prediction:Prodigal:2.6,similar to AA sequence:UniProtKB:P77306;locus_tag=GNDLBLIP_00862;product=Inner membrane protein YqiK
33958	Prodigal:2.6	CDS	721410	722174	.	+	0	ID=GNDLBLIP_00863;inference=ab initio prediction:Prodigal:2.6;locus_tag=GNDLBLIP_00863;product=hypothetical protein
33958	Prodigal:2.6	CDS	722252	722533	.	+	0	ID=GNDLBLIP_00864;inference=ab initio prediction:Prodigal:2.6;locus_tag=GNDLBLIP_00864;product=hypothetical protein
33958	Prodigal:2.6	CDS	722666	723115	.	-	0	ID=GNDLBLIP_00865;inference=ab initio prediction:Prodigal:2.6;locus_tag=GNDLBLIP_00865;product=hypothetical protein
33958	Prodigal:2.6	CDS	723144	723326	.	-	0	ID=GNDLBLIP_00866;inference=ab initio prediction:Prodigal:2.6;locus_tag=GNDLBLIP_00866;product=hypothetical protein
33958	Prodigal:2.6	CDS	723323	723943	.	-	0	ID=GNDLBLIP_00867;inference=ab initio prediction:Prodigal:2.6;locus_tag=GNDLBLIP_00867;product=hypothetical protein
33958	Prodigal:2.6	CDS	724033	725388	.	-	0	ID=GNDLBLIP_00868;eC_number=3.1.26.12;Name=rne;dbxref=COG:COG1530;gene=rne;inference=ab initio prediction:Prodigal:2.6,similar to AA sequence:UniProtKB:P21513;locus_tag=GNDLBLIP_00868;product=Ribonuclease E
33958	Prodigal:2.6	CDS	725376	725588	.	-	0	ID=GNDLBLIP_00869;eC_number=3.1.26.-;Name=rng;dbxref=COG:COG1530;gene=rng;inference=ab initio prediction:Prodigal:2.6,similar to AA sequence:UniProtKB:P0A9J0;locus_tag=GNDLBLIP_00869;product=Ribonuclease G
33958	Prodigal:2.6	CDS	725692	725784	.	-	0	ID=GNDLBLIP_00870;inference=ab initio prediction:Prodigal:2.6;locus_tag=GNDLBLIP_00870;product=hypothetical protein
33958	Prodigal:2.6	CDS	725811	726107	.	-	0	ID=GNDLBLIP_00871;Name=hup;gene=hup;inference=ab initio prediction:Prodigal:2.6,similar to AA sequence:UniProtKB:P0A3H1;locus_tag=GNDLBLIP_00871;product=DNA-binding protein HU
33958	Prodigal:2.6	CDS	726154	727185	.	+	0	ID=GNDLBLIP_00872;eC_number=3.2.2.-;Name=mutY;gene=mutY;inference=ab initio prediction:Prodigal:2.6,similar to AA sequence:UniProtKB:P83847;locus_tag=GNDLBLIP_00872;product=Adenine DNA glycosylase
33958	Prodigal:2.6	CDS	727331	728251	.	+	0	ID=GNDLBLIP_00873;eC_number=2.7.1.-;Name=ydjH;dbxref=COG:COG0524;gene=ydjH;inference=ab initio prediction:Prodigal:2.6,similar to AA sequence:UniProtKB:P77493;locus_tag=GNDLBLIP_00873;product=putative sugar kinase YdjH
33958	Prodigal:2.6	CDS	728294	728656	.	+	0	ID=GNDLBLIP_00874;inference=ab initio prediction:Prodigal:2.6;locus_tag=GNDLBLIP_00874;product=hypothetical protein
33958	Prodigal:2.6	CDS	728724	729758	.	+	0	ID=GNDLBLIP_00875;inference=ab initio prediction:Prodigal:2.6;locus_tag=GNDLBLIP_00875;product=hypothetical protein
33958	Prodigal:2.6	CDS	729836	730135	.	+	0	ID=GNDLBLIP_00876;inference=ab initio prediction:Prodigal:2.6;locus_tag=GNDLBLIP_00876;product=hypothetical protein
33958	Prodigal:2.6	CDS	730200	730544	.	+	0	ID=GNDLBLIP_00877;eC_number=5.2.1.8;Name=surA_1;gene=surA_1;inference=ab initio prediction:Prodigal:2.6,protein motif:HAMAP:MF_01183;locus_tag=GNDLBLIP_00877;product=Chaperone SurA
33958	Prodigal:2.6	CDS	730551	731573	.	+	0	ID=GNDLBLIP_00878;eC_number=5.2.1.8;Name=prsA;dbxref=COG:COG0760;gene=prsA;inference=ab initio prediction:Prodigal:2.6,similar to AA sequence:UniProtKB:P24327;locus_tag=GNDLBLIP_00878;product=Foldase protein PrsA
33958	Prodigal:2.6	CDS	731732	732664	.	+	0	ID=GNDLBLIP_00879;eC_number=1.13.12.16;dbxref=COG:COG2070;inference=ab initio prediction:Prodigal:2.6,similar to AA sequence:UniProtKB:Q9I4V0;locus_tag=GNDLBLIP_00879;product=Nitronate monooxygenase
33958	Prodigal:2.6	CDS	733273	733449	.	+	0	ID=GNDLBLIP_00880;inference=ab initio prediction:Prodigal:2.6;locus_tag=GNDLBLIP_00880;product=hypothetical protein
33958	Prodigal:2.6	CDS	733486	734496	.	+	0	ID=GNDLBLIP_00881;inference=ab initio prediction:Prodigal:2.6;locus_tag=GNDLBLIP_00881;product=hypothetical protein
33958	Prodigal:2.6	CDS	734676	735125	.	+	0	ID=GNDLBLIP_00882;inference=ab initio prediction:Prodigal:2.6;locus_tag=GNDLBLIP_00882;product=hypothetical protein
33958	Prodigal:2.6	CDS	735573	735710	.	+	0	ID=GNDLBLIP_00883;inference=ab initio prediction:Prodigal:2.6;locus_tag=GNDLBLIP_00883;product=hypothetical protein
33958	Prodigal:2.6	CDS	735891	737513	.	+	0	ID=GNDLBLIP_00884;inference=ab initio prediction:Prodigal:2.6;locus_tag=GNDLBLIP_00884;product=hypothetical protein
33958	Prodigal:2.6	CDS	737868	738044	.	+	0	ID=GNDLBLIP_00885;inference=ab initio prediction:Prodigal:2.6;locus_tag=GNDLBLIP_00885;product=hypothetical protein
33958	Prodigal:2.6	CDS	738244	739242	.	+	0	ID=GNDLBLIP_00886;inference=ab initio prediction:Prodigal:2.6;locus_tag=GNDLBLIP_00886;product=hypothetical protein
33958	Prodigal:2.6	CDS	739650	739937	.	-	0	ID=GNDLBLIP_00887;eC_number=2.8.1.-;dbxref=COG:COG0607;inference=ab initio prediction:Prodigal:2.6,similar to AA sequence:UniProtKB:D3RPB9;locus_tag=GNDLBLIP_00887;product=Sulfurtransferase
33958	Prodigal:2.6	CDS	739950	740753	.	-	0	ID=GNDLBLIP_00888;Name=hel;dbxref=COG:COG2503;gene=hel;inference=ab initio prediction:Prodigal:2.6,similar to AA sequence:UniProtKB:P26093;locus_tag=GNDLBLIP_00888;product=Lipoprotein E
33958	Prodigal:2.6	CDS	740839	741711	.	+	0	ID=GNDLBLIP_00889;eC_number=1.17.99.6;Name=queG;dbxref=COG:COG1600;gene=queG;inference=ab initio prediction:Prodigal:2.6,similar to AA sequence:UniProtKB:P97030;locus_tag=GNDLBLIP_00889;product=Epoxyqueuosine reductase
33958	Prodigal:2.6	CDS	741991	742155	.	-	0	ID=GNDLBLIP_00890;inference=ab initio prediction:Prodigal:2.6;locus_tag=GNDLBLIP_00890;product=hypothetical protein
33958	Prodigal:2.6	CDS	742275	742964	.	-	0	ID=GNDLBLIP_00891;inference=ab initio prediction:Prodigal:2.6;locus_tag=GNDLBLIP_00891;product=hypothetical protein
33958	Prodigal:2.6	CDS	743009	744358	.	-	0	ID=GNDLBLIP_00892;inference=ab initio prediction:Prodigal:2.6;locus_tag=GNDLBLIP_00892;product=hypothetical protein
33958	Prodigal:2.6	CDS	744319	744801	.	-	0	ID=GNDLBLIP_00893;inference=ab initio prediction:Prodigal:2.6;locus_tag=GNDLBLIP_00893;product=hypothetical protein
33958	Prodigal:2.6	CDS	744789	744986	.	-	0	ID=GNDLBLIP_00894;inference=ab initio prediction:Prodigal:2.6;locus_tag=GNDLBLIP_00894;product=hypothetical protein
33958	Prodigal:2.6	CDS	745126	745353	.	-	0	ID=GNDLBLIP_00895;inference=ab initio prediction:Prodigal:2.6;locus_tag=GNDLBLIP_00895;product=hypothetical protein
33958	Prodigal:2.6	CDS	745493	746014	.	+	0	ID=GNDLBLIP_00896;inference=ab initio prediction:Prodigal:2.6;locus_tag=GNDLBLIP_00896;product=hypothetical protein
33958	Prodigal:2.6	CDS	746025	746225	.	-	0	ID=GNDLBLIP_00897;inference=ab initio prediction:Prodigal:2.6;locus_tag=GNDLBLIP_00897;product=hypothetical protein
33958	Prodigal:2.6	CDS	746252	746986	.	-	0	ID=GNDLBLIP_00898;Name=pafB;dbxref=COG:COG2378;gene=pafB;inference=ab initio prediction:Prodigal:2.6,similar to AA sequence:UniProtKB:P9WIM1;locus_tag=GNDLBLIP_00898;product=Protein PafB
33958	Prodigal:2.6	CDS	746996	747649	.	-	0	ID=GNDLBLIP_00899;inference=ab initio prediction:Prodigal:2.6;locus_tag=GNDLBLIP_00899;product=hypothetical protein
33958	Prodigal:2.6	CDS	747672	748544	.	-	0	ID=GNDLBLIP_00900;inference=ab initio prediction:Prodigal:2.6;locus_tag=GNDLBLIP_00900;product=hypothetical protein
33958	Prodigal:2.6	CDS	748703	749872	.	+	0	ID=GNDLBLIP_00901;Name=araJ_1;dbxref=COG:COG2814;gene=araJ_1;inference=ab initio prediction:Prodigal:2.6,similar to AA sequence:UniProtKB:P23910;locus_tag=GNDLBLIP_00901;product=Putative transporter AraJ
33958	Prodigal:2.6	CDS	750129	750434	.	-	0	ID=GNDLBLIP_00902;inference=ab initio prediction:Prodigal:2.6;locus_tag=GNDLBLIP_00902;product=hypothetical protein
33958	Prodigal:2.6	CDS	750392	750883	.	-	0	ID=GNDLBLIP_00903;inference=ab initio prediction:Prodigal:2.6;locus_tag=GNDLBLIP_00903;product=hypothetical protein
33958	Prodigal:2.6	CDS	750888	751286	.	-	0	ID=GNDLBLIP_00904;inference=ab initio prediction:Prodigal:2.6;locus_tag=GNDLBLIP_00904;product=hypothetical protein
33958	Prodigal:2.6	CDS	751504	751914	.	+	0	ID=GNDLBLIP_00905;inference=ab initio prediction:Prodigal:2.6;locus_tag=GNDLBLIP_00905;product=hypothetical protein
33958	Prodigal:2.6	CDS	752003	752521	.	-	0	ID=GNDLBLIP_00906;inference=ab initio prediction:Prodigal:2.6,similar to AA sequence:UniProtKB:Q7A339;locus_tag=GNDLBLIP_00906;note=UPF0312 protein SA2479;product=hypothetical protein
33958	Prodigal:2.6	CDS	752566	753384	.	-	0	ID=GNDLBLIP_00907;eC_number=1.13.11.29;Name=ygiD;dbxref=COG:COG3384;gene=ygiD;inference=ab initio prediction:Prodigal:2.6,similar to AA sequence:UniProtKB:P24197;locus_tag=GNDLBLIP_00907;product=4%2C5-DOPA dioxygenase extradiol
33958	Prodigal:2.6	CDS	753456	753800	.	-	0	ID=GNDLBLIP_00908;Name=csaA;dbxref=COG:COG0073;gene=csaA;inference=ab initio prediction:Prodigal:2.6,similar to AA sequence:UniProtKB:P37584;locus_tag=GNDLBLIP_00908;product=putative chaperone CsaA
33958	Prodigal:2.6	CDS	753800	754375	.	-	0	ID=GNDLBLIP_00909;inference=ab initio prediction:Prodigal:2.6;locus_tag=GNDLBLIP_00909;product=hypothetical protein
33958	Prodigal:2.6	CDS	754415	754753	.	-	0	ID=GNDLBLIP_00910;inference=ab initio prediction:Prodigal:2.6;locus_tag=GNDLBLIP_00910;product=hypothetical protein
33958	Prodigal:2.6	CDS	754846	755022	.	-	0	ID=GNDLBLIP_00911;inference=ab initio prediction:Prodigal:2.6;locus_tag=GNDLBLIP_00911;product=hypothetical protein
33958	Prodigal:2.6	CDS	755009	755254	.	-	0	ID=GNDLBLIP_00912;inference=ab initio prediction:Prodigal:2.6;locus_tag=GNDLBLIP_00912;product=hypothetical protein
33958	Prodigal:2.6	CDS	755256	755969	.	-	0	ID=GNDLBLIP_00913;inference=ab initio prediction:Prodigal:2.6;locus_tag=GNDLBLIP_00913;product=hypothetical protein
33958	Prodigal:2.6	CDS	755979	756824	.	-	0	ID=GNDLBLIP_00914;Name=ada_2;dbxref=COG:COG0350;gene=ada_2;inference=ab initio prediction:Prodigal:2.6,similar to AA sequence:UniProtKB:P06134;locus_tag=GNDLBLIP_00914;product=Bifunctional transcriptional activator/DNA repair enzyme Ada
33958	Prodigal:2.6	CDS	756885	757409	.	-	0	ID=GNDLBLIP_00915;inference=ab initio prediction:Prodigal:2.6;locus_tag=GNDLBLIP_00915;product=hypothetical protein
33958	Prodigal:2.6	CDS	757554	757877	.	-	0	ID=GNDLBLIP_00916;inference=ab initio prediction:Prodigal:2.6;locus_tag=GNDLBLIP_00916;product=hypothetical protein
33958	Prodigal:2.6	CDS	757874	760348	.	-	0	ID=GNDLBLIP_00917;inference=ab initio prediction:Prodigal:2.6;locus_tag=GNDLBLIP_00917;product=hypothetical protein
33958	Prodigal:2.6	CDS	760378	761043	.	-	0	ID=GNDLBLIP_00918;inference=ab initio prediction:Prodigal:2.6;locus_tag=GNDLBLIP_00918;product=hypothetical protein
33958	Prodigal:2.6	CDS	761655	762089	.	-	0	ID=GNDLBLIP_00919;inference=ab initio prediction:Prodigal:2.6;locus_tag=GNDLBLIP_00919;product=hypothetical protein
33958	Prodigal:2.6	CDS	762156	762815	.	-	0	ID=GNDLBLIP_00920;inference=ab initio prediction:Prodigal:2.6;locus_tag=GNDLBLIP_00920;product=hypothetical protein
33958	Prodigal:2.6	CDS	762928	763302	.	-	0	ID=GNDLBLIP_00921;inference=ab initio prediction:Prodigal:2.6;locus_tag=GNDLBLIP_00921;product=hypothetical protein
33958	Prodigal:2.6	CDS	763299	763763	.	-	0	ID=GNDLBLIP_00922;inference=ab initio prediction:Prodigal:2.6;locus_tag=GNDLBLIP_00922;product=hypothetical protein
33958	Prodigal:2.6	CDS	764315	764473	.	+	0	ID=GNDLBLIP_00923;inference=ab initio prediction:Prodigal:2.6;locus_tag=GNDLBLIP_00923;product=hypothetical protein
33958	Prodigal:2.6	CDS	764516	766015	.	+	0	ID=GNDLBLIP_00924;inference=ab initio prediction:Prodigal:2.6;locus_tag=GNDLBLIP_00924;product=hypothetical protein
33958	Prodigal:2.6	CDS	766277	766954	.	+	0	ID=GNDLBLIP_00925;inference=ab initio prediction:Prodigal:2.6;locus_tag=GNDLBLIP_00925;product=hypothetical protein
33958	Prodigal:2.6	CDS	767099	767458	.	+	0	ID=GNDLBLIP_00926;inference=ab initio prediction:Prodigal:2.6;locus_tag=GNDLBLIP_00926;product=hypothetical protein
33958	Prodigal:2.6	CDS	767575	767841	.	-	0	ID=GNDLBLIP_00927;eC_number=3.6.1.31;Name=hisE;dbxref=COG:COG0140;gene=hisE;inference=ab initio prediction:Prodigal:2.6,similar to AA sequence:UniProtKB:Q81G00;locus_tag=GNDLBLIP_00927;product=Phosphoribosyl-ATP pyrophosphatase
33958	Prodigal:2.6	CDS	767820	768161	.	-	0	ID=GNDLBLIP_00928;eC_number=3.5.4.19;Name=hisI;dbxref=COG:COG0139;gene=hisI;inference=ab initio prediction:Prodigal:2.6,similar to AA sequence:UniProtKB:P9WMM7;locus_tag=GNDLBLIP_00928;product=Phosphoribosyl-AMP cyclohydrolase
33958	Prodigal:2.6	CDS	768152	768910	.	-	0	ID=GNDLBLIP_00929;eC_number=4.1.3.-;Name=hisF;dbxref=COG:COG0107;gene=hisF;inference=ab initio prediction:Prodigal:2.6,similar to AA sequence:UniProtKB:Q7SIB9;locus_tag=GNDLBLIP_00929;product=Imidazole glycerol phosphate synthase subunit HisF
33958	Prodigal:2.6	CDS	769015	769629	.	-	0	ID=GNDLBLIP_00930;inference=ab initio prediction:Prodigal:2.6;locus_tag=GNDLBLIP_00930;product=hypothetical protein
33958	Prodigal:2.6	CDS	769659	769856	.	-	0	ID=GNDLBLIP_00931;eC_number=5.3.1.16;Name=hisA_1;dbxref=COG:COG0106;gene=hisA_1;inference=ab initio prediction:Prodigal:2.6,similar to AA sequence:UniProtKB:A1R562;locus_tag=GNDLBLIP_00931;product=1-(5-phosphoribosyl)-5-[(5-phosphoribosylamino)methylideneamino] imidazole-4-carboxamide isomerase
33958	Prodigal:2.6	CDS	769814	770146	.	-	0	ID=GNDLBLIP_00932;eC_number=5.3.1.16;Name=hisA_2;dbxref=COG:COG0106;gene=hisA_2;inference=ab initio prediction:Prodigal:2.6,similar to AA sequence:UniProtKB:P10372;locus_tag=GNDLBLIP_00932;product=1-(5-phosphoribosyl)-5-[(5-phosphoribosylamino)methylideneamino] imidazole-4-carboxamide isomerase
33958	Prodigal:2.6	CDS	770106	770375	.	-	0	ID=GNDLBLIP_00933;eC_number=5.3.1.16;Name=hisA_3;dbxref=COG:COG0106;gene=hisA_3;inference=ab initio prediction:Prodigal:2.6,similar to AA sequence:UniProtKB:Q9PM74;locus_tag=GNDLBLIP_00933;product=1-(5-phosphoribosyl)-5-[(5-phosphoribosylamino)methylideneamino] imidazole-4-carboxamide isomerase
33958	Prodigal:2.6	CDS	770377	771729	.	-	0	ID=GNDLBLIP_00934;eC_number=3.4.21.-;Name=tri1_1;dbxref=COG:COG0793;gene=tri1_1;inference=ab initio prediction:Prodigal:2.6,similar to AA sequence:UniProtKB:Q9RDE2;locus_tag=GNDLBLIP_00934;product=Tricorn protease
33958	Prodigal:2.6	CDS	771846	772718	.	-	0	ID=GNDLBLIP_00935;Name=tolB;dbxref=COG:COG0823;gene=tolB;inference=ab initio prediction:Prodigal:2.6,similar to AA sequence:UniProtKB:Q83F59;locus_tag=GNDLBLIP_00935;product=Protein TolB
33958	Prodigal:2.6	CDS	772715	773572	.	-	0	ID=GNDLBLIP_00936;eC_number=3.4.21.-;Name=tri1_2;dbxref=COG:COG0793;gene=tri1_2;inference=ab initio prediction:Prodigal:2.6,similar to AA sequence:UniProtKB:Q9RDE2;locus_tag=GNDLBLIP_00936;product=Tricorn protease
33958	Prodigal:2.6	CDS	773588	774166	.	-	0	ID=GNDLBLIP_00937;eC_number=2.4.2.-;Name=hisH;dbxref=COG:COG0118;gene=hisH;inference=ab initio prediction:Prodigal:2.6,similar to AA sequence:UniProtKB:Q9KSX0;locus_tag=GNDLBLIP_00937;product=Imidazole glycerol phosphate synthase subunit HisH
33958	Prodigal:2.6	CDS	774276	775409	.	-	0	ID=GNDLBLIP_00938;Name=hisB;dbxref=COG:COG0131;gene=hisB;inference=ab initio prediction:Prodigal:2.6,similar to AA sequence:UniProtKB:Q8ABA7;locus_tag=GNDLBLIP_00938;product=Histidine biosynthesis bifunctional protein HisB
33958	Prodigal:2.6	CDS	775446	776474	.	-	0	ID=GNDLBLIP_00939;eC_number=2.6.1.9;Name=hisC;dbxref=COG:COG0079;gene=hisC;inference=ab initio prediction:Prodigal:2.6,similar to AA sequence:UniProtKB:P06986;locus_tag=GNDLBLIP_00939;product=Histidinol-phosphate aminotransferase
33958	Prodigal:2.6	CDS	776511	777779	.	-	0	ID=GNDLBLIP_00940;eC_number=1.1.1.23;Name=hisD;dbxref=COG:COG0141;gene=hisD;inference=ab initio prediction:Prodigal:2.6,similar to AA sequence:UniProtKB:P10370;locus_tag=GNDLBLIP_00940;product=Histidinol dehydrogenase
33958	Prodigal:2.6	CDS	777899	778228	.	-	0	ID=GNDLBLIP_00941;eC_number=2.4.2.17;Name=hisG;dbxref=COG:COG0040;gene=hisG;inference=ab initio prediction:Prodigal:2.6,similar to AA sequence:UniProtKB:P60757;locus_tag=GNDLBLIP_00941;product=ATP phosphoribosyltransferase
33958	Prodigal:2.6	CDS	778648	778809	.	-	0	ID=GNDLBLIP_00942;inference=ab initio prediction:Prodigal:2.6;locus_tag=GNDLBLIP_00942;product=hypothetical protein
33958	Prodigal:2.6	CDS	778981	779781	.	-	0	ID=GNDLBLIP_00943;Name=hsrA_1;gene=hsrA_1;inference=ab initio prediction:Prodigal:2.6,similar to AA sequence:UniProtKB:P31474;locus_tag=GNDLBLIP_00943;product=putative transport protein HsrA
33958	Prodigal:2.6	CDS	779748	780389	.	-	0	ID=GNDLBLIP_00944;Name=hsrA_2;gene=hsrA_2;inference=ab initio prediction:Prodigal:2.6,similar to AA sequence:UniProtKB:P31474;locus_tag=GNDLBLIP_00944;product=putative transport protein HsrA
33958	Prodigal:2.6	CDS	780466	781704	.	-	0	ID=GNDLBLIP_00945;eC_number=2.3.1.179;Name=fabF_1;gene=fabF_1;inference=ab initio prediction:Prodigal:2.6,similar to AA sequence:UniProtKB:P73283;locus_tag=GNDLBLIP_00945;product=3-oxoacyl-[acyl-carrier-protein] synthase 2
33958	Prodigal:2.6	CDS	781819	782583	.	-	0	ID=GNDLBLIP_00946;eC_number=1.13.11.24;Name=yhhW_1;dbxref=COG:COG1741;gene=yhhW_1;inference=ab initio prediction:Prodigal:2.6,similar to AA sequence:UniProtKB:P46852;locus_tag=GNDLBLIP_00946;product=Quercetin 2%2C3-dioxygenase
33958	Prodigal:2.6	CDS	782746	783024	.	-	0	ID=GNDLBLIP_00947;inference=ab initio prediction:Prodigal:2.6;locus_tag=GNDLBLIP_00947;product=hypothetical protein
33958	Prodigal:2.6	CDS	783222	784097	.	-	0	ID=GNDLBLIP_00948;eC_number=1.13.11.24;Name=yhhW_2;dbxref=COG:COG1741;gene=yhhW_2;inference=ab initio prediction:Prodigal:2.6,similar to AA sequence:UniProtKB:P46852;locus_tag=GNDLBLIP_00948;product=Quercetin 2%2C3-dioxygenase
33958	Prodigal:2.6	CDS	784149	784484	.	-	0	ID=GNDLBLIP_00949;inference=ab initio prediction:Prodigal:2.6;locus_tag=GNDLBLIP_00949;product=hypothetical protein
33958	Prodigal:2.6	CDS	784638	785159	.	+	0	ID=GNDLBLIP_00950;inference=ab initio prediction:Prodigal:2.6;locus_tag=GNDLBLIP_00950;product=hypothetical protein
33958	Prodigal:2.6	CDS	785253	785579	.	-	0	ID=GNDLBLIP_00951;inference=ab initio prediction:Prodigal:2.6;locus_tag=GNDLBLIP_00951;product=hypothetical protein
33958	Prodigal:2.6	CDS	785597	786532	.	-	0	ID=GNDLBLIP_00952;eC_number=3.4.16.4;inference=ab initio prediction:Prodigal:2.6,similar to AA sequence:UniProtKB:P15555;locus_tag=GNDLBLIP_00952;product=D-alanyl-D-alanine carboxypeptidase
33958	Prodigal:2.6	CDS	786548	787630	.	-	0	ID=GNDLBLIP_00953;inference=ab initio prediction:Prodigal:2.6;locus_tag=GNDLBLIP_00953;product=hypothetical protein
33958	Prodigal:2.6	CDS	787723	788466	.	-	0	ID=GNDLBLIP_00954;eC_number=2.1.1.222;Name=ubiG_2;dbxref=COG:COG2227;gene=ubiG_2;inference=ab initio prediction:Prodigal:2.6,similar to AA sequence:UniProtKB:P17993;locus_tag=GNDLBLIP_00954;product=Ubiquinone biosynthesis O-methyltransferase
33958	Prodigal:2.6	CDS	788470	789015	.	-	0	ID=GNDLBLIP_00955;inference=ab initio prediction:Prodigal:2.6;locus_tag=GNDLBLIP_00955;product=hypothetical protein
33958	Prodigal:2.6	CDS	789056	789883	.	-	0	ID=GNDLBLIP_00956;eC_number=2.5.1.63;Name=flA;dbxref=COG:COG1912;gene=flA;inference=ab initio prediction:Prodigal:2.6,similar to AA sequence:UniProtKB:Q70GK9;locus_tag=GNDLBLIP_00956;product=5'-fluoro-5'-deoxy-adenosine synthase
33958	Prodigal:2.6	CDS	789998	790354	.	+	0	ID=GNDLBLIP_00957;inference=ab initio prediction:Prodigal:2.6;locus_tag=GNDLBLIP_00957;product=hypothetical protein
33958	Prodigal:2.6	CDS	790374	790958	.	+	0	ID=GNDLBLIP_00958;Name=ybeZ;dbxref=COG:COG1702;gene=ybeZ;inference=ab initio prediction:Prodigal:2.6,similar to AA sequence:UniProtKB:P0A9K3;locus_tag=GNDLBLIP_00958;product=PhoH-like protein
33958	Prodigal:2.6	CDS	791021	791515	.	+	0	ID=GNDLBLIP_00959;inference=ab initio prediction:Prodigal:2.6;locus_tag=GNDLBLIP_00959;product=hypothetical protein
33958	Prodigal:2.6	CDS	791650	792363	.	+	0	ID=GNDLBLIP_00960;inference=ab initio prediction:Prodigal:2.6;locus_tag=GNDLBLIP_00960;product=hypothetical protein
33958	Prodigal:2.6	CDS	792378	793238	.	+	0	ID=GNDLBLIP_00961;inference=ab initio prediction:Prodigal:2.6;locus_tag=GNDLBLIP_00961;product=hypothetical protein
33958	Prodigal:2.6	CDS	793371	793961	.	+	0	ID=GNDLBLIP_00962;inference=ab initio prediction:Prodigal:2.6;locus_tag=GNDLBLIP_00962;product=hypothetical protein
33958	Prodigal:2.6	CDS	794013	796805	.	-	0	ID=GNDLBLIP_00963;Name=uvrA_1;dbxref=COG:COG0178;gene=uvrA_1;inference=ab initio prediction:Prodigal:2.6,similar to AA sequence:UniProtKB:Q9WYV0;locus_tag=GNDLBLIP_00963;product=UvrABC system protein A
33958	Prodigal:2.6	CDS	797072	797200	.	+	0	ID=GNDLBLIP_00964;inference=ab initio prediction:Prodigal:2.6;locus_tag=GNDLBLIP_00964;product=hypothetical protein
33958	Prodigal:2.6	CDS	797304	797837	.	+	0	ID=GNDLBLIP_00965;Name=hemR_2;dbxref=COG:COG1629;gene=hemR_2;inference=ab initio prediction:Prodigal:2.6,similar to AA sequence:UniProtKB:P31499;locus_tag=GNDLBLIP_00965;product=Hemin receptor
33958	Prodigal:2.6	CDS	797909	798874	.	+	0	ID=GNDLBLIP_00966;Name=btuB_4;gene=btuB_4;inference=ab initio prediction:Prodigal:2.6,protein motif:HAMAP:MF_01531;locus_tag=GNDLBLIP_00966;product=Vitamin B12 transporter BtuB
33958	Prodigal:2.6	CDS	798977	799696	.	+	0	ID=GNDLBLIP_00967;inference=ab initio prediction:Prodigal:2.6;locus_tag=GNDLBLIP_00967;product=hypothetical protein
33958	Prodigal:2.6	CDS	799700	800926	.	+	0	ID=GNDLBLIP_00968;Name=dnaN;dbxref=COG:COG0592;gene=dnaN;inference=ab initio prediction:Prodigal:2.6,similar to AA sequence:UniProtKB:P05649;locus_tag=GNDLBLIP_00968;product=Beta sliding clamp
33958	Prodigal:2.6	CDS	801087	802925	.	+	0	ID=GNDLBLIP_00969;eC_number=6.1.1.20;Name=pheT_1;dbxref=COG:COG0072;gene=pheT_1;inference=ab initio prediction:Prodigal:2.6,similar to AA sequence:UniProtKB:Q5LC76;locus_tag=GNDLBLIP_00969;product=Phenylalanine--tRNA ligase beta subunit
33958	Prodigal:2.6	CDS	802877	803485	.	+	0	ID=GNDLBLIP_00970;eC_number=6.1.1.20;Name=pheT_2;dbxref=COG:COG0072;gene=pheT_2;inference=ab initio prediction:Prodigal:2.6,similar to AA sequence:UniProtKB:Q7MXR4;locus_tag=GNDLBLIP_00970;product=Phenylalanine--tRNA ligase beta subunit
33958	Prodigal:2.6	CDS	803539	804057	.	+	0	ID=GNDLBLIP_00971;inference=ab initio prediction:Prodigal:2.6;locus_tag=GNDLBLIP_00971;product=hypothetical protein
33958	Prodigal:2.6	CDS	804104	804343	.	-	0	ID=GNDLBLIP_00972;inference=ab initio prediction:Prodigal:2.6;locus_tag=GNDLBLIP_00972;product=hypothetical protein
33958	Prodigal:2.6	CDS	804398	805291	.	-	0	ID=GNDLBLIP_00973;eC_number=1.1.1.157;Name=mmgB;dbxref=COG:COG1250;gene=mmgB;inference=ab initio prediction:Prodigal:2.6,similar to AA sequence:UniProtKB:P45856;locus_tag=GNDLBLIP_00973;product=putative 3-hydroxybutyryl-CoA dehydrogenase
33958	Prodigal:2.6	CDS	805341	806216	.	-	0	ID=GNDLBLIP_00974;eC_number=3.5.2.6;Name=per1_1;gene=per1_1;inference=ab initio prediction:Prodigal:2.6,similar to AA sequence:UniProtKB:P37321;locus_tag=GNDLBLIP_00974;product=Extended-spectrum beta-lactamase PER-1
33958	Prodigal:2.6	CDS	806258	807004	.	-	0	ID=GNDLBLIP_00975;inference=ab initio prediction:Prodigal:2.6;locus_tag=GNDLBLIP_00975;product=hypothetical protein
33958	Prodigal:2.6	CDS	807058	808020	.	-	0	ID=GNDLBLIP_00976;eC_number=1.-.-.-;Name=pht4;gene=pht4;inference=ab initio prediction:Prodigal:2.6,similar to AA sequence:UniProtKB:Q05184;locus_tag=GNDLBLIP_00976;product=Putative 4%2C5-dihydroxyphthalate dehydrogenase
33958	Prodigal:2.6	CDS	808194	808841	.	+	0	ID=GNDLBLIP_00977;eC_number=2.1.1.77;Name=pcm;dbxref=COG:COG2518;gene=pcm;inference=ab initio prediction:Prodigal:2.6,similar to AA sequence:UniProtKB:A5F9C1;locus_tag=GNDLBLIP_00977;product=Protein-L-isoaspartate O-methyltransferase
33958	Prodigal:2.6	CDS	809602	810267	.	-	0	ID=GNDLBLIP_00978;inference=ab initio prediction:Prodigal:2.6;locus_tag=GNDLBLIP_00978;product=hypothetical protein
33958	Prodigal:2.6	CDS	810297	812306	.	+	0	ID=GNDLBLIP_00979;eC_number=4.2.1.49;Name=hutU;dbxref=COG:COG2987;gene=hutU;inference=ab initio prediction:Prodigal:2.6,similar to AA sequence:UniProtKB:P25080;locus_tag=GNDLBLIP_00979;product=Urocanate hydratase
33958	Prodigal:2.6	CDS	812371	812703	.	-	0	ID=GNDLBLIP_00980;Name=emrE;dbxref=COG:COG2076;gene=emrE;inference=ab initio prediction:Prodigal:2.6,similar to AA sequence:UniProtKB:P23895;locus_tag=GNDLBLIP_00980;product=Multidrug transporter EmrE
33958	Prodigal:2.6	CDS	812777	813277	.	-	0	ID=GNDLBLIP_00981;Name=eco;gene=eco;inference=ab initio prediction:Prodigal:2.6,similar to AA sequence:UniProtKB:B1JSA0;locus_tag=GNDLBLIP_00981;product=Ecotin
33958	Prodigal:2.6	CDS	813811	814782	.	-	0	ID=GNDLBLIP_00982;inference=ab initio prediction:Prodigal:2.6;locus_tag=GNDLBLIP_00982;product=hypothetical protein
33958	Prodigal:2.6	CDS	814889	815332	.	-	0	ID=GNDLBLIP_00983;inference=ab initio prediction:Prodigal:2.6;locus_tag=GNDLBLIP_00983;product=hypothetical protein
33958	Prodigal:2.6	CDS	815349	817046	.	-	0	ID=GNDLBLIP_00984;eC_number=3.4.19.13;Name=ggt;dbxref=COG:COG0405;gene=ggt;inference=ab initio prediction:Prodigal:2.6,similar to AA sequence:UniProtKB:P18956;locus_tag=GNDLBLIP_00984;product=Glutathione hydrolase proenzyme
33958	Prodigal:2.6	CDS	817469	818119	.	+	0	ID=GNDLBLIP_00985;inference=ab initio prediction:Prodigal:2.6,similar to AA sequence:UniProtKB:Q7A788;locus_tag=GNDLBLIP_00985;product=putative epimerase/dehydratase
33958	Prodigal:2.6	CDS	818116	818871	.	+	0	ID=GNDLBLIP_00986;inference=ab initio prediction:Prodigal:2.6;locus_tag=GNDLBLIP_00986;product=hypothetical protein
33958	Prodigal:2.6	CDS	818930	819349	.	-	0	ID=GNDLBLIP_00987;inference=ab initio prediction:Prodigal:2.6;locus_tag=GNDLBLIP_00987;product=hypothetical protein
33958	Prodigal:2.6	CDS	819499	819984	.	-	0	ID=GNDLBLIP_00988;inference=ab initio prediction:Prodigal:2.6;locus_tag=GNDLBLIP_00988;product=hypothetical protein
33958	Prodigal:2.6	CDS	820133	821197	.	-	0	ID=GNDLBLIP_00989;eC_number=2.3.1.180;Name=fabH_1;gene=fabH_1;inference=ab initio prediction:Prodigal:2.6,similar to AA sequence:UniProtKB:C1CIR8;locus_tag=GNDLBLIP_00989;product=3-oxoacyl-[acyl-carrier-protein] synthase 3
33958	Prodigal:2.6	CDS	821311	821880	.	+	0	ID=GNDLBLIP_00990;inference=ab initio prediction:Prodigal:2.6;locus_tag=GNDLBLIP_00990;product=hypothetical protein
33958	Prodigal:2.6	CDS	821891	822616	.	+	0	ID=GNDLBLIP_00991;eC_number=2.1.1.163;Name=ubiE_1;dbxref=COG:COG2226;gene=ubiE_1;inference=ab initio prediction:Prodigal:2.6,similar to AA sequence:UniProtKB:P0A887;locus_tag=GNDLBLIP_00991;product=Ubiquinone/menaquinone biosynthesis C-methyltransferase UbiE
33958	Prodigal:2.6	CDS	822742	823044	.	+	0	ID=GNDLBLIP_00992;inference=ab initio prediction:Prodigal:2.6;locus_tag=GNDLBLIP_00992;product=hypothetical protein
33958	Prodigal:2.6	CDS	823044	823337	.	+	0	ID=GNDLBLIP_00993;inference=ab initio prediction:Prodigal:2.6;locus_tag=GNDLBLIP_00993;product=hypothetical protein
33958	Prodigal:2.6	CDS	823583	823723	.	+	0	ID=GNDLBLIP_00994;inference=ab initio prediction:Prodigal:2.6;locus_tag=GNDLBLIP_00994;product=hypothetical protein
33958	Prodigal:2.6	CDS	823840	825153	.	+	0	ID=GNDLBLIP_00995;eC_number=3.1.-.-;Name=rny;dbxref=COG:COG1418;gene=rny;inference=ab initio prediction:Prodigal:2.6,similar to AA sequence:UniProtKB:O31774;locus_tag=GNDLBLIP_00995;product=Ribonuclease Y
33958	Prodigal:2.6	CDS	825249	826310	.	+	0	ID=GNDLBLIP_00996;inference=ab initio prediction:Prodigal:2.6;locus_tag=GNDLBLIP_00996;product=hypothetical protein
33958	Prodigal:2.6	CDS	826354	826830	.	+	0	ID=GNDLBLIP_00997;inference=ab initio prediction:Prodigal:2.6;locus_tag=GNDLBLIP_00997;product=hypothetical protein
33958	Prodigal:2.6	CDS	827174	828268	.	+	0	ID=GNDLBLIP_00998;eC_number=3.2.1.14;Name=chiA1;gene=chiA1;inference=ab initio prediction:Prodigal:2.6,similar to AA sequence:UniProtKB:P20533;locus_tag=GNDLBLIP_00998;product=Chitinase A1
33958	Prodigal:2.6	CDS	828311	828805	.	-	0	ID=GNDLBLIP_00999;inference=ab initio prediction:Prodigal:2.6;locus_tag=GNDLBLIP_00999;product=hypothetical protein
33958	Prodigal:2.6	CDS	828975	829478	.	-	0	ID=GNDLBLIP_01000;eC_number=1.5.1.2;Name=proC_1;gene=proC_1;inference=ab initio prediction:Prodigal:2.6,protein motif:HAMAP:MF_01925;locus_tag=GNDLBLIP_01000;product=Pyrroline-5-carboxylate reductase
33958	Prodigal:2.6	CDS	829595	830170	.	-	0	ID=GNDLBLIP_01001;Name=fnr_1;dbxref=COG:COG0664;gene=fnr_1;inference=ab initio prediction:Prodigal:2.6,similar to AA sequence:UniProtKB:Q9EXQ1;locus_tag=GNDLBLIP_01001;product=Anaerobic regulatory protein
33958	Prodigal:2.6	CDS	830176	830742	.	-	0	ID=GNDLBLIP_01002;eC_number=3.-.-.-;Name=yecD;dbxref=COG:COG1335;gene=yecD;inference=ab initio prediction:Prodigal:2.6,similar to AA sequence:UniProtKB:P0ADI7;locus_tag=GNDLBLIP_01002;product=Isochorismatase family protein YecD
33958	Prodigal:2.6	CDS	830729	831256	.	-	0	ID=GNDLBLIP_01003;inference=ab initio prediction:Prodigal:2.6;locus_tag=GNDLBLIP_01003;product=hypothetical protein
33958	Prodigal:2.6	CDS	831263	831964	.	-	0	ID=GNDLBLIP_01004;inference=ab initio prediction:Prodigal:2.6;locus_tag=GNDLBLIP_01004;product=hypothetical protein
33958	Prodigal:2.6	CDS	832099	834261	.	+	0	ID=GNDLBLIP_01005;eC_number=3.6.4.12;Name=pcrA_1;gene=pcrA_1;inference=ab initio prediction:Prodigal:2.6,similar to AA sequence:UniProtKB:P64319;locus_tag=GNDLBLIP_01005;product=ATP-dependent DNA helicase PcrA
33958	Prodigal:2.6	CDS	834239	834418	.	+	0	ID=GNDLBLIP_01006;inference=ab initio prediction:Prodigal:2.6;locus_tag=GNDLBLIP_01006;product=hypothetical protein
33958	Prodigal:2.6	CDS	834488	835213	.	-	0	ID=GNDLBLIP_01007;inference=ab initio prediction:Prodigal:2.6;locus_tag=GNDLBLIP_01007;product=hypothetical protein
33958	Prodigal:2.6	CDS	835251	836591	.	-	0	ID=GNDLBLIP_01008;eC_number=3.4.11.10;inference=ab initio prediction:Prodigal:2.6,similar to AA sequence:UniProtKB:Q01693;locus_tag=GNDLBLIP_01008;product=Bacterial leucyl aminopeptidase
33958	Prodigal:2.6	CDS	836826	837314	.	+	0	ID=GNDLBLIP_01009;Name=hpr;gene=hpr;inference=ab initio prediction:Prodigal:2.6,protein motif:HAMAP:MF_01911;locus_tag=GNDLBLIP_01009;product=HTH-type transcriptional regulator Hpr
33958	Prodigal:2.6	CDS	837311	838078	.	+	0	ID=GNDLBLIP_01010;inference=ab initio prediction:Prodigal:2.6;locus_tag=GNDLBLIP_01010;product=hypothetical protein
33958	Prodigal:2.6	CDS	838134	839291	.	-	0	ID=GNDLBLIP_01011;eC_number=3.2.1.22;Name=agaA_1;gene=agaA_1;inference=ab initio prediction:Prodigal:2.6,similar to AA sequence:UniProtKB:B3PGJ1;locus_tag=GNDLBLIP_01011;product=Alpha-galactosidase A
33958	Prodigal:2.6	CDS	839317	840087	.	-	0	ID=GNDLBLIP_01012;inference=ab initio prediction:Prodigal:2.6;locus_tag=GNDLBLIP_01012;product=hypothetical protein
33958	Prodigal:2.6	CDS	840212	840595	.	-	0	ID=GNDLBLIP_01013;inference=ab initio prediction:Prodigal:2.6;locus_tag=GNDLBLIP_01013;product=hypothetical protein
33958	Prodigal:2.6	CDS	840582	841328	.	-	0	ID=GNDLBLIP_01014;inference=ab initio prediction:Prodigal:2.6;locus_tag=GNDLBLIP_01014;product=hypothetical protein
33958	Prodigal:2.6	CDS	841423	844371	.	+	0	ID=GNDLBLIP_01015;eC_number=2.7.7.7;Name=polA;dbxref=COG:COG0258;gene=polA;inference=ab initio prediction:Prodigal:2.6,similar to AA sequence:UniProtKB:P00582;locus_tag=GNDLBLIP_01015;product=DNA polymerase I
33958	Prodigal:2.6	CDS	844402	845199	.	+	0	ID=GNDLBLIP_01016;eC_number=2.7.8.12;Name=tagF;dbxref=COG:COG1887;gene=tagF;inference=ab initio prediction:Prodigal:2.6,similar to AA sequence:UniProtKB:Q5HLM5;locus_tag=GNDLBLIP_01016;product=Teichoic acid poly(glycerol phosphate) polymerase
33958	Prodigal:2.6	CDS	845282	846886	.	-	0	ID=GNDLBLIP_01017;eC_number=3.2.1.22;Name=agaA_2;gene=agaA_2;inference=ab initio prediction:Prodigal:2.6,similar to AA sequence:UniProtKB:Q9ALJ4;locus_tag=GNDLBLIP_01017;product=Alpha-galactosidase AgaA
33958	Prodigal:2.6	CDS	846862	847458	.	-	0	ID=GNDLBLIP_01018;inference=ab initio prediction:Prodigal:2.6;locus_tag=GNDLBLIP_01018;product=hypothetical protein
33958	Prodigal:2.6	CDS	847638	848675	.	+	0	ID=GNDLBLIP_01019;inference=ab initio prediction:Prodigal:2.6;locus_tag=GNDLBLIP_01019;product=hypothetical protein
33958	Prodigal:2.6	CDS	848749	849540	.	+	0	ID=GNDLBLIP_01020;eC_number=2.1.1.-;Name=noeI;gene=noeI;inference=ab initio prediction:Prodigal:2.6,similar to AA sequence:UniProtKB:P55473;locus_tag=GNDLBLIP_01020;product=2-O-methyltransferase NoeI
33958	Prodigal:2.6	CDS	849540	849776	.	+	0	ID=GNDLBLIP_01021;inference=ab initio prediction:Prodigal:2.6;locus_tag=GNDLBLIP_01021;product=hypothetical protein
33958	Prodigal:2.6	CDS	849791	850237	.	+	0	ID=GNDLBLIP_01022;inference=ab initio prediction:Prodigal:2.6;locus_tag=GNDLBLIP_01022;product=hypothetical protein
33958	Prodigal:2.6	CDS	850270	851028	.	+	0	ID=GNDLBLIP_01023;inference=ab initio prediction:Prodigal:2.6;locus_tag=GNDLBLIP_01023;product=hypothetical protein
33958	Prodigal:2.6	CDS	851083	852249	.	+	0	ID=GNDLBLIP_01024;eC_number=3.2.1.180;Name=ugl;gene=ugl;inference=ab initio prediction:Prodigal:2.6,similar to AA sequence:UniProtKB:Q9A0T3;locus_tag=GNDLBLIP_01024;product=Unsaturated chondroitin disaccharide hydrolase
33958	Prodigal:2.6	CDS	852268	853365	.	+	0	ID=GNDLBLIP_01025;inference=ab initio prediction:Prodigal:2.6;locus_tag=GNDLBLIP_01025;product=hypothetical protein
33958	Prodigal:2.6	CDS	853444	853731	.	+	0	ID=GNDLBLIP_01026;inference=ab initio prediction:Prodigal:2.6;locus_tag=GNDLBLIP_01026;product=hypothetical protein
33958	Prodigal:2.6	CDS	854118	855764	.	+	0	ID=GNDLBLIP_01027;eC_number=3.2.1.52;dbxref=COG:COG3525;inference=ab initio prediction:Prodigal:2.6,similar to AA sequence:UniProtKB:Q7WUL4;locus_tag=GNDLBLIP_01027;product=Beta-N-acetylhexosaminidase
33958	Prodigal:2.6	CDS	855894	856139	.	-	0	ID=GNDLBLIP_01028;Name=metQ_1;dbxref=COG:COG1464;gene=metQ_1;inference=ab initio prediction:Prodigal:2.6,similar to AA sequence:UniProtKB:P28635;locus_tag=GNDLBLIP_01028;product=D-methionine-binding lipoprotein MetQ
33958	Prodigal:2.6	CDS	856244	856702	.	-	0	ID=GNDLBLIP_01029;Name=metQ_2;dbxref=COG:COG1464;gene=metQ_2;inference=ab initio prediction:Prodigal:2.6,similar to AA sequence:UniProtKB:P28635;locus_tag=GNDLBLIP_01029;product=D-methionine-binding lipoprotein MetQ
33958	Prodigal:2.6	CDS	856713	857369	.	-	0	ID=GNDLBLIP_01030;Name=metI;dbxref=COG:COG2011;gene=metI;inference=ab initio prediction:Prodigal:2.6,similar to AA sequence:UniProtKB:P31547;locus_tag=GNDLBLIP_01030;product=D-methionine transport system permease protein MetI
33958	Prodigal:2.6	CDS	857362	857577	.	-	0	ID=GNDLBLIP_01031;eC_number=3.6.3.-;Name=metN_1;dbxref=COG:COG1135;gene=metN_1;inference=ab initio prediction:Prodigal:2.6,similar to AA sequence:UniProtKB:Q87RS1;locus_tag=GNDLBLIP_01031;product=Methionine import ATP-binding protein MetN
33958	Prodigal:2.6	CDS	857579	858391	.	-	0	ID=GNDLBLIP_01032;eC_number=3.6.3.-;Name=metN_2;dbxref=COG:COG1135;gene=metN_2;inference=ab initio prediction:Prodigal:2.6,similar to AA sequence:UniProtKB:Q87RS1;locus_tag=GNDLBLIP_01032;product=Methionine import ATP-binding protein MetN
33958	Prodigal:2.6	CDS	858888	859280	.	+	0	ID=GNDLBLIP_01033;inference=ab initio prediction:Prodigal:2.6;locus_tag=GNDLBLIP_01033;product=hypothetical protein
33958	Prodigal:2.6	CDS	859182	859379	.	-	0	ID=GNDLBLIP_01034;inference=ab initio prediction:Prodigal:2.6;locus_tag=GNDLBLIP_01034;product=hypothetical protein
33958	Prodigal:2.6	CDS	859425	860510	.	+	0	ID=GNDLBLIP_01035;Name=bepF;gene=bepF;inference=ab initio prediction:Prodigal:2.6,similar to AA sequence:UniProtKB:Q8FWV8;locus_tag=GNDLBLIP_01035;product=Efflux pump periplasmic linker BepF
33958	Prodigal:2.6	CDS	860531	861286	.	+	0	ID=GNDLBLIP_01036;Name=bepG_1;gene=bepG_1;inference=ab initio prediction:Prodigal:2.6,similar to AA sequence:UniProtKB:Q8FWV9;locus_tag=GNDLBLIP_01036;product=Efflux pump membrane transporter BepG
33958	Prodigal:2.6	CDS	861310	863721	.	+	0	ID=GNDLBLIP_01037;Name=bepE_3;gene=bepE_3;inference=ab initio prediction:Prodigal:2.6,similar to AA sequence:UniProtKB:Q8G2M6;locus_tag=GNDLBLIP_01037;product=Efflux pump membrane transporter BepE
33958	Prodigal:2.6	CDS	863702	865150	.	+	0	ID=GNDLBLIP_01038;Name=oprM_3;dbxref=COG:COG1538;gene=oprM_3;inference=ab initio prediction:Prodigal:2.6,similar to AA sequence:UniProtKB:Q51487;locus_tag=GNDLBLIP_01038;product=Outer membrane protein OprM
33958	Prodigal:2.6	CDS	865306	865509	.	-	0	ID=GNDLBLIP_01039;inference=ab initio prediction:Prodigal:2.6;locus_tag=GNDLBLIP_01039;product=hypothetical protein
33958	Prodigal:2.6	CDS	865777	865971	.	-	0	ID=GNDLBLIP_01040;inference=ab initio prediction:Prodigal:2.6;locus_tag=GNDLBLIP_01040;product=hypothetical protein
33958	Prodigal:2.6	CDS	866018	866689	.	-	0	ID=GNDLBLIP_01041;eC_number=3.1.4.46;Name=glpQ_1;dbxref=COG:COG0584;gene=glpQ_1;inference=ab initio prediction:Prodigal:2.6,similar to AA sequence:UniProtKB:P37965;locus_tag=GNDLBLIP_01041;product=Glycerophosphodiester phosphodiesterase
33958	Prodigal:2.6	CDS	866873	867430	.	+	0	ID=GNDLBLIP_01042;eC_number=2.4.2.8;Name=hpt;gene=hpt;inference=ab initio prediction:Prodigal:2.6,similar to AA sequence:UniProtKB:P99085;locus_tag=GNDLBLIP_01042;product=Hypoxanthine-guanine phosphoribosyltransferase
33958	Prodigal:2.6	CDS	867456	868034	.	+	0	ID=GNDLBLIP_01043;eC_number=2.7.4.3;Name=adk;dbxref=COG:COG0563;gene=adk;inference=ab initio prediction:Prodigal:2.6,similar to AA sequence:UniProtKB:P9WKF5;locus_tag=GNDLBLIP_01043;product=Adenylate kinase
33958	Prodigal:2.6	CDS	868107	869090	.	+	0	ID=GNDLBLIP_01044;eC_number=3.6.5.-;Name=obg;gene=obg;inference=ab initio prediction:Prodigal:2.6,similar to AA sequence:UniProtKB:Q02GB1;locus_tag=GNDLBLIP_01044;product=GTPase Obg
33958	Prodigal:2.6	CDS	869135	870415	.	+	0	ID=GNDLBLIP_01045;eC_number=3.6.4.13;Name=rhlE_1;dbxref=COG:COG0513;gene=rhlE_1;inference=ab initio prediction:Prodigal:2.6,similar to AA sequence:UniProtKB:P25888;locus_tag=GNDLBLIP_01045;product=ATP-dependent RNA helicase RhlE
33958	Prodigal:2.6	CDS	870488	871585	.	-	0	ID=GNDLBLIP_01046;Name=resA_1;gene=resA_1;inference=ab initio prediction:Prodigal:2.6,similar to AA sequence:UniProtKB:P35160;locus_tag=GNDLBLIP_01046;product=Thiol-disulfide oxidoreductase ResA
33958	Prodigal:2.6	CDS	872100	872867	.	-	0	ID=GNDLBLIP_01047;eC_number=3.1.-.-;Name=yjjV;dbxref=COG:COG0084;gene=yjjV;inference=ab initio prediction:Prodigal:2.6,similar to AA sequence:UniProtKB:P39408;locus_tag=GNDLBLIP_01047;product=putative metal-dependent hydrolase YjjV
33958	Prodigal:2.6	CDS	872929	873894	.	-	0	ID=GNDLBLIP_01048;inference=ab initio prediction:Prodigal:2.6;locus_tag=GNDLBLIP_01048;product=hypothetical protein
33958	Prodigal:2.6	CDS	873900	874484	.	-	0	ID=GNDLBLIP_01049;eC_number=2.5.1.10;dbxref=COG:COG0142;inference=ab initio prediction:Prodigal:2.6,similar to AA sequence:UniProtKB:P9WKH1;locus_tag=GNDLBLIP_01049;product=(2E%2C6E)-farnesyl diphosphate synthase
33958	Prodigal:2.6	CDS	874481	874738	.	-	0	ID=GNDLBLIP_01050;eC_number=2.5.1.10;dbxref=COG:COG0142;inference=ab initio prediction:Prodigal:2.6,similar to AA sequence:UniProtKB:P9WKH1;locus_tag=GNDLBLIP_01050;product=(2E%2C6E)-farnesyl diphosphate synthase
33958	Prodigal:2.6	CDS	874962	876098	.	-	0	ID=GNDLBLIP_01051;Name=pitA;dbxref=COG:COG0306;gene=pitA;inference=ab initio prediction:Prodigal:2.6,similar to AA sequence:UniProtKB:P0AFJ7;locus_tag=GNDLBLIP_01051;product=Low-affinity inorganic phosphate transporter 1
33958	Prodigal:2.6	CDS	876119	876667	.	-	0	ID=GNDLBLIP_01052;inference=ab initio prediction:Prodigal:2.6;locus_tag=GNDLBLIP_01052;product=hypothetical protein
33958	Prodigal:2.6	CDS	876895	878583	.	-	0	ID=GNDLBLIP_01053;eC_number=3.6.4.13;Name=cshA;dbxref=COG:COG0513;gene=cshA;inference=ab initio prediction:Prodigal:2.6,similar to AA sequence:UniProtKB:Q81IT9;locus_tag=GNDLBLIP_01053;product=DEAD-box ATP-dependent RNA helicase CshA
33958	Prodigal:2.6	CDS	878697	879215	.	-	0	ID=GNDLBLIP_01054;inference=ab initio prediction:Prodigal:2.6;locus_tag=GNDLBLIP_01054;product=hypothetical protein
33958	Prodigal:2.6	CDS	879439	880113	.	+	0	ID=GNDLBLIP_01055;eC_number=6.3.4.4;Name=purA_1;dbxref=COG:COG0104;gene=purA_1;inference=ab initio prediction:Prodigal:2.6,similar to AA sequence:UniProtKB:P65887;locus_tag=GNDLBLIP_01055;product=Adenylosuccinate synthetase
33958	Prodigal:2.6	CDS	880113	880724	.	+	0	ID=GNDLBLIP_01056;eC_number=6.3.4.4;Name=purA_2;gene=purA_2;inference=ab initio prediction:Prodigal:2.6,similar to AA sequence:UniProtKB:P99099;locus_tag=GNDLBLIP_01056;product=Adenylosuccinate synthetase
33958	Prodigal:2.6	CDS	880977	881807	.	+	0	ID=GNDLBLIP_01057;inference=ab initio prediction:Prodigal:2.6;locus_tag=GNDLBLIP_01057;product=hypothetical protein
33958	Prodigal:2.6	CDS	881971	882765	.	+	0	ID=GNDLBLIP_01058;eC_number=3.6.-.-;Name=soj;dbxref=COG:COG1192;gene=soj;inference=ab initio prediction:Prodigal:2.6,similar to AA sequence:UniProtKB:P37522;locus_tag=GNDLBLIP_01058;product=Sporulation initiation inhibitor protein Soj
33958	Prodigal:2.6	CDS	882776	883591	.	+	0	ID=GNDLBLIP_01059;Name=parB;dbxref=COG:COG1475;gene=parB;inference=ab initio prediction:Prodigal:2.6,similar to AA sequence:UniProtKB:Q83AH2;locus_tag=GNDLBLIP_01059;product=putative chromosome-partitioning protein ParB
33958	Prodigal:2.6	CDS	883699	884322	.	+	0	ID=GNDLBLIP_01060;inference=ab initio prediction:Prodigal:2.6;locus_tag=GNDLBLIP_01060;product=hypothetical protein
33958	Prodigal:2.6	CDS	884422	884769	.	+	0	ID=GNDLBLIP_01061;eC_number=1.17.1.8;Name=dapB_1;dbxref=COG:COG0289;gene=dapB_1;inference=ab initio prediction:Prodigal:2.6,similar to AA sequence:UniProtKB:Q9X1K8;locus_tag=GNDLBLIP_01061;product=4-hydroxy-tetrahydrodipicolinate reductase
33958	Prodigal:2.6	CDS	884766	885119	.	+	0	ID=GNDLBLIP_01062;eC_number=1.17.1.8;Name=dapB_2;dbxref=COG:COG0289;gene=dapB_2;inference=ab initio prediction:Prodigal:2.6,similar to AA sequence:UniProtKB:Q9K1F1;locus_tag=GNDLBLIP_01062;product=4-hydroxy-tetrahydrodipicolinate reductase
33958	Prodigal:2.6	CDS	885354	885935	.	+	0	ID=GNDLBLIP_01063;eC_number=3.4.21.89;Name=lepB_1;gene=lepB_1;inference=ab initio prediction:Prodigal:2.6,similar to AA sequence:UniProtKB:A8GQT7;locus_tag=GNDLBLIP_01063;product=Signal peptidase I
33958	Prodigal:2.6	CDS	885962	886783	.	+	0	ID=GNDLBLIP_01064;eC_number=3.4.21.89;Name=lepB_2;dbxref=COG:COG0681;gene=lepB_2;inference=ab initio prediction:Prodigal:2.6,similar to AA sequence:UniProtKB:P00803;locus_tag=GNDLBLIP_01064;product=Signal peptidase I
33958	Prodigal:2.6	CDS	886776	887384	.	+	0	ID=GNDLBLIP_01065;inference=ab initio prediction:Prodigal:2.6;locus_tag=GNDLBLIP_01065;product=hypothetical protein
33958	Prodigal:2.6	CDS	887391	887570	.	+	0	ID=GNDLBLIP_01066;inference=ab initio prediction:Prodigal:2.6;locus_tag=GNDLBLIP_01066;product=hypothetical protein
33958	Prodigal:2.6	CDS	887597	889072	.	+	0	ID=GNDLBLIP_01067;eC_number=3.4.21.62;Name=apr;gene=apr;inference=ab initio prediction:Prodigal:2.6,similar to AA sequence:UniProtKB:P00781;locus_tag=GNDLBLIP_01067;product=Subtilisin DY
33958	Prodigal:2.6	CDS	889165	889635	.	+	0	ID=GNDLBLIP_01068;inference=ab initio prediction:Prodigal:2.6;locus_tag=GNDLBLIP_01068;product=hypothetical protein
33958	Prodigal:2.6	CDS	889657	890349	.	+	0	ID=GNDLBLIP_01069;Name=yiaD_1;dbxref=COG:COG2885;gene=yiaD_1;inference=ab initio prediction:Prodigal:2.6,similar to AA sequence:UniProtKB:P37665;locus_tag=GNDLBLIP_01069;product=putative lipoprotein YiaD
33958	Prodigal:2.6	CDS	890447	891112	.	+	0	ID=GNDLBLIP_01070;eC_number=2.4.2.45;dbxref=COG:COG0382;inference=ab initio prediction:Prodigal:2.6,similar to AA sequence:UniProtKB:P9WFR5;locus_tag=GNDLBLIP_01070;product=Decaprenyl-phosphate phosphoribosyltransferase
33958	Prodigal:2.6	CDS	891355	891618	.	+	0	ID=GNDLBLIP_01071;inference=ab initio prediction:Prodigal:2.6;locus_tag=GNDLBLIP_01071;product=hypothetical protein
33958	Prodigal:2.6	CDS	891615	891938	.	+	0	ID=GNDLBLIP_01072;inference=ab initio prediction:Prodigal:2.6;locus_tag=GNDLBLIP_01072;product=hypothetical protein
33958	Prodigal:2.6	CDS	892056	893219	.	+	0	ID=GNDLBLIP_01073;eC_number=2.8.1.7;Name=iscS;gene=iscS;inference=ab initio prediction:Prodigal:2.6,similar to AA sequence:UniProtKB:O54055;locus_tag=GNDLBLIP_01073;product=Cysteine desulfurase IscS
33958	Prodigal:2.6	CDS	893288	893617	.	+	0	ID=GNDLBLIP_01074;Name=trxA_1;gene=trxA_1;inference=ab initio prediction:Prodigal:2.6,similar to AA sequence:UniProtKB:P10472;locus_tag=GNDLBLIP_01074;product=Thioredoxin
33958	Aragorn:1.2	tRNA	893738	893812	.	+	.	ID=GNDLBLIP_01075;inference=COORDINATES:profile:Aragorn:1.2;locus_tag=GNDLBLIP_01075;product=tRNA-Asp(gtc)
33958	Aragorn:1.2	tRNA	893842	893916	.	+	.	ID=GNDLBLIP_01076;inference=COORDINATES:profile:Aragorn:1.2;locus_tag=GNDLBLIP_01076;product=tRNA-Asp(gtc)
33958	Prodigal:2.6	CDS	894240	895394	.	+	0	ID=GNDLBLIP_01077;Name=xerD_1;dbxref=COG:COG4974;gene=xerD_1;inference=ab initio prediction:Prodigal:2.6,similar to AA sequence:UniProtKB:P0A8P8;locus_tag=GNDLBLIP_01077;product=Tyrosine recombinase XerD
33958	Prodigal:2.6	CDS	895949	896335	.	+	0	ID=GNDLBLIP_01078;Name=ctb_1;dbxref=COG:COG2346;gene=ctb_1;inference=ab initio prediction:Prodigal:2.6,similar to AA sequence:UniProtKB:Q0PB48;locus_tag=GNDLBLIP_01078;product=Group 3 truncated hemoglobin ctb
33958	Prodigal:2.6	CDS	896747	897082	.	+	0	ID=GNDLBLIP_01079;inference=ab initio prediction:Prodigal:2.6;locus_tag=GNDLBLIP_01079;product=hypothetical protein
33958	Prodigal:2.6	CDS	897292	897438	.	+	0	ID=GNDLBLIP_01080;inference=ab initio prediction:Prodigal:2.6;locus_tag=GNDLBLIP_01080;product=hypothetical protein
33958	Prodigal:2.6	CDS	897447	897617	.	+	0	ID=GNDLBLIP_01081;inference=ab initio prediction:Prodigal:2.6;locus_tag=GNDLBLIP_01081;product=hypothetical protein
33958	Prodigal:2.6	CDS	897575	897883	.	+	0	ID=GNDLBLIP_01082;Name=nsrR;gene=nsrR;inference=ab initio prediction:Prodigal:2.6,protein motif:HAMAP:MF_01177;locus_tag=GNDLBLIP_01082;product=HTH-type transcriptional repressor NsrR
33958	Prodigal:2.6	CDS	897937	899154	.	+	0	ID=GNDLBLIP_01083;eC_number=1.14.12.17;Name=hmp;gene=hmp;inference=ab initio prediction:Prodigal:2.6,similar to AA sequence:UniProtKB:P39662;locus_tag=GNDLBLIP_01083;product=Flavohemoprotein
33958	Prodigal:2.6	CDS	899862	900137	.	+	0	ID=GNDLBLIP_01084;eC_number=2.6.1.42;Name=ilvE_1;dbxref=COG:COG0115;gene=ilvE_1;inference=ab initio prediction:Prodigal:2.6,similar to AA sequence:UniProtKB:O86428;locus_tag=GNDLBLIP_01084;product=Branched-chain-amino-acid aminotransferase
33958	Prodigal:2.6	CDS	900179	900751	.	+	0	ID=GNDLBLIP_01085;eC_number=2.6.1.42;Name=ilvE_2;dbxref=COG:COG0115;gene=ilvE_2;inference=ab initio prediction:Prodigal:2.6,similar to AA sequence:UniProtKB:O86428;locus_tag=GNDLBLIP_01085;product=Branched-chain-amino-acid aminotransferase
33958	Prodigal:2.6	CDS	900748	902424	.	+	0	ID=GNDLBLIP_01086;eC_number=4.2.1.9;Name=ilvD_1;dbxref=COG:COG0129;gene=ilvD_1;inference=ab initio prediction:Prodigal:2.6,similar to AA sequence:UniProtKB:P9WKJ5;locus_tag=GNDLBLIP_01086;product=Dihydroxy-acid dehydratase
33958	Prodigal:2.6	CDS	902432	904132	.	+	0	ID=GNDLBLIP_01087;eC_number=2.2.1.6;Name=ilvB_1;dbxref=COG:COG0028;gene=ilvB_1;inference=ab initio prediction:Prodigal:2.6,similar to AA sequence:UniProtKB:P37251;locus_tag=GNDLBLIP_01087;product=Acetolactate synthase large subunit
33958	Prodigal:2.6	CDS	904149	904679	.	+	0	ID=GNDLBLIP_01088;eC_number=2.2.1.6;Name=ilvH_1;dbxref=COG:COG0440;gene=ilvH_1;inference=ab initio prediction:Prodigal:2.6,similar to AA sequence:UniProtKB:P9WKJ3;locus_tag=GNDLBLIP_01088;product=Putative acetolactate synthase small subunit
33958	Prodigal:2.6	CDS	904701	905747	.	+	0	ID=GNDLBLIP_01089;eC_number=1.1.1.382;dbxref=COG:COG0059;inference=ab initio prediction:Prodigal:2.6,similar to AA sequence:UniProtKB:A8ZTR0;locus_tag=GNDLBLIP_01089;product=Ketol-acid reductoisomerase (NAD(+))
33958	Prodigal:2.6	CDS	905699	906880	.	+	0	ID=GNDLBLIP_01090;eC_number=4.3.1.19;Name=ilvA_1;dbxref=COG:COG1171;gene=ilvA_1;inference=ab initio prediction:Prodigal:2.6,similar to AA sequence:UniProtKB:P9WG95;locus_tag=GNDLBLIP_01090;product=L-threonine dehydratase biosynthetic IlvA
33958	Prodigal:2.6	CDS	907089	907544	.	-	0	ID=GNDLBLIP_01091;inference=ab initio prediction:Prodigal:2.6;locus_tag=GNDLBLIP_01091;product=hypothetical protein
33958	Prodigal:2.6	CDS	907557	909896	.	-	0	ID=GNDLBLIP_01092;Name=btuB_5;gene=btuB_5;inference=ab initio prediction:Prodigal:2.6,protein motif:HAMAP:MF_01531;locus_tag=GNDLBLIP_01092;product=Vitamin B12 transporter BtuB
33958	Prodigal:2.6	CDS	910213	911286	.	+	0	ID=GNDLBLIP_01093;eC_number=2.7.13.3;Name=btsS_2;dbxref=COG:COG3275;gene=btsS_2;inference=ab initio prediction:Prodigal:2.6,similar to AA sequence:UniProtKB:P0AD14;locus_tag=GNDLBLIP_01093;product=Sensor histidine kinase BtsS
33958	Prodigal:2.6	CDS	911276	912010	.	+	0	ID=GNDLBLIP_01094;Name=ypdB_1;dbxref=COG:COG3279;gene=ypdB_1;inference=ab initio prediction:Prodigal:2.6,similar to AA sequence:UniProtKB:P0AE39;locus_tag=GNDLBLIP_01094;product=Transcriptional regulatory protein YpdB
33958	Prodigal:2.6	CDS	912346	913575	.	+	0	ID=GNDLBLIP_01095;Name=btuB_6;gene=btuB_6;inference=ab initio prediction:Prodigal:2.6,protein motif:HAMAP:MF_01531;locus_tag=GNDLBLIP_01095;product=Vitamin B12 transporter BtuB
33958	Prodigal:2.6	CDS	913581	914807	.	+	0	ID=GNDLBLIP_01096;inference=ab initio prediction:Prodigal:2.6;locus_tag=GNDLBLIP_01096;product=hypothetical protein
33958	Prodigal:2.6	CDS	915082	915183	.	-	0	ID=GNDLBLIP_01097;inference=ab initio prediction:Prodigal:2.6;locus_tag=GNDLBLIP_01097;product=hypothetical protein
33958	Prodigal:2.6	CDS	915237	915329	.	+	0	ID=GNDLBLIP_01098;inference=ab initio prediction:Prodigal:2.6;locus_tag=GNDLBLIP_01098;product=hypothetical protein
33958	Prodigal:2.6	CDS	915362	915517	.	+	0	ID=GNDLBLIP_01099;inference=ab initio prediction:Prodigal:2.6;locus_tag=GNDLBLIP_01099;product=hypothetical protein
33958	Prodigal:2.6	CDS	915830	915973	.	+	0	ID=GNDLBLIP_01100;inference=ab initio prediction:Prodigal:2.6;locus_tag=GNDLBLIP_01100;product=hypothetical protein
33958	Prodigal:2.6	CDS	916849	917265	.	+	0	ID=GNDLBLIP_01101;inference=ab initio prediction:Prodigal:2.6;locus_tag=GNDLBLIP_01101;product=hypothetical protein
33958	Prodigal:2.6	CDS	918015	918674	.	+	0	ID=GNDLBLIP_01102;inference=ab initio prediction:Prodigal:2.6;locus_tag=GNDLBLIP_01102;product=hypothetical protein
33958	Prodigal:2.6	CDS	918703	919086	.	+	0	ID=GNDLBLIP_01103;inference=ab initio prediction:Prodigal:2.6;locus_tag=GNDLBLIP_01103;product=hypothetical protein
33958	Prodigal:2.6	CDS	919089	919736	.	+	0	ID=GNDLBLIP_01104;Name=rpoE_1;gene=rpoE_1;inference=ab initio prediction:Prodigal:2.6,similar to AA sequence:UniProtKB:D0ZSY9;locus_tag=GNDLBLIP_01104;product=ECF RNA polymerase sigma-E factor
33958	Prodigal:2.6	CDS	919759	920100	.	+	0	ID=GNDLBLIP_01105;eC_number=1.20.4.1;Name=arsC_1;gene=arsC_1;inference=ab initio prediction:Prodigal:2.6,similar to AA sequence:UniProtKB:P08692;locus_tag=GNDLBLIP_01105;product=Arsenate reductase
33958	Prodigal:2.6	CDS	921011	921505	.	+	0	ID=GNDLBLIP_01106;eC_number=3.2.1.31;Name=uidA_1;dbxref=COG:COG3250;gene=uidA_1;inference=ab initio prediction:Prodigal:2.6,similar to AA sequence:UniProtKB:P05804;locus_tag=GNDLBLIP_01106;product=Beta-glucuronidase
33958	Prodigal:2.6	CDS	921577	921768	.	+	0	ID=GNDLBLIP_01107;inference=ab initio prediction:Prodigal:2.6;locus_tag=GNDLBLIP_01107;product=hypothetical protein
33958	Prodigal:2.6	CDS	921774	922814	.	+	0	ID=GNDLBLIP_01108;eC_number=3.2.1.23;Name=lacZ_2;gene=lacZ_2;inference=ab initio prediction:Prodigal:2.6,similar to AA sequence:UniProtKB:P26257;locus_tag=GNDLBLIP_01108;product=Beta-galactosidase
33958	Prodigal:2.6	CDS	922885	923916	.	+	0	ID=GNDLBLIP_01109;eC_number=3.2.1.18;Name=nedA_1;gene=nedA_1;inference=ab initio prediction:Prodigal:2.6,similar to AA sequence:UniProtKB:Q02834;locus_tag=GNDLBLIP_01109;product=Sialidase
33958	Prodigal:2.6	CDS	924369	924593	.	+	0	ID=GNDLBLIP_01110;inference=ab initio prediction:Prodigal:2.6;locus_tag=GNDLBLIP_01110;product=hypothetical protein
33958	Prodigal:2.6	CDS	924603	924875	.	+	0	ID=GNDLBLIP_01111;inference=ab initio prediction:Prodigal:2.6;locus_tag=GNDLBLIP_01111;product=hypothetical protein
33958	Prodigal:2.6	CDS	925348	925440	.	+	0	ID=GNDLBLIP_01112;inference=ab initio prediction:Prodigal:2.6;locus_tag=GNDLBLIP_01112;product=hypothetical protein
33958	Prodigal:2.6	CDS	925502	926293	.	-	0	ID=GNDLBLIP_01113;Name=nimR_1;gene=nimR_1;inference=ab initio prediction:Prodigal:2.6,similar to AA sequence:UniProtKB:P76241;locus_tag=GNDLBLIP_01113;product=HTH-type transcriptional regulator NimR
33958	Prodigal:2.6	CDS	926427	927749	.	+	0	ID=GNDLBLIP_01114;inference=ab initio prediction:Prodigal:2.6;locus_tag=GNDLBLIP_01114;product=hypothetical protein
33958	Prodigal:2.6	CDS	927753	928811	.	+	0	ID=GNDLBLIP_01115;Name=emrA_1;dbxref=COG:COG1566;gene=emrA_1;inference=ab initio prediction:Prodigal:2.6,similar to AA sequence:UniProtKB:P27303;locus_tag=GNDLBLIP_01115;product=Multidrug export protein EmrA
33958	Prodigal:2.6	CDS	928812	929894	.	+	0	ID=GNDLBLIP_01116;inference=ab initio prediction:Prodigal:2.6;locus_tag=GNDLBLIP_01116;product=hypothetical protein
33958	Prodigal:2.6	CDS	929878	930402	.	+	0	ID=GNDLBLIP_01117;inference=ab initio prediction:Prodigal:2.6;locus_tag=GNDLBLIP_01117;product=hypothetical protein
33958	Prodigal:2.6	CDS	930426	930839	.	+	0	ID=GNDLBLIP_01118;inference=ab initio prediction:Prodigal:2.6;locus_tag=GNDLBLIP_01118;product=hypothetical protein
33958	Prodigal:2.6	CDS	930853	931197	.	+	0	ID=GNDLBLIP_01119;inference=ab initio prediction:Prodigal:2.6;locus_tag=GNDLBLIP_01119;product=hypothetical protein
33958	Prodigal:2.6	CDS	932336	933793	.	-	0	ID=GNDLBLIP_01120;Name=yccM_1;dbxref=COG:COG0348;gene=yccM_1;inference=ab initio prediction:Prodigal:2.6,similar to AA sequence:UniProtKB:P52636;locus_tag=GNDLBLIP_01120;product=Putative electron transport protein YccM
33958	Prodigal:2.6	CDS	933822	933998	.	-	0	ID=GNDLBLIP_01121;inference=ab initio prediction:Prodigal:2.6;locus_tag=GNDLBLIP_01121;product=hypothetical protein
33958	Prodigal:2.6	CDS	934010	935245	.	-	0	ID=GNDLBLIP_01122;eC_number=1.9.3.1;Name=fixN_2;gene=fixN_2;inference=ab initio prediction:Prodigal:2.6,similar to AA sequence:UniProtKB:Q05572;locus_tag=GNDLBLIP_01122;product=Cytochrome c oxidase subunit 1 %2C bacteroid
33958	Prodigal:2.6	CDS	935457	936269	.	-	0	ID=GNDLBLIP_01123;eC_number=1.9.3.1;Name=ccoN1_1;dbxref=COG:COG3278;gene=ccoN1_1;inference=ab initio prediction:Prodigal:2.6,similar to AA sequence:UniProtKB:D9IA43;locus_tag=GNDLBLIP_01123;product=Cbb3-type cytochrome c oxidase subunit CcoN1
33958	Prodigal:2.6	CDS	936368	936547	.	+	0	ID=GNDLBLIP_01124;inference=ab initio prediction:Prodigal:2.6;locus_tag=GNDLBLIP_01124;product=hypothetical protein
33958	Prodigal:2.6	CDS	936740	937249	.	+	0	ID=GNDLBLIP_01125;Name=rhaR_1;gene=rhaR_1;inference=ab initio prediction:Prodigal:2.6,protein motif:HAMAP:MF_01533;locus_tag=GNDLBLIP_01125;product=HTH-type transcriptional activator RhaR
33958	Prodigal:2.6	CDS	937297	937884	.	+	0	ID=GNDLBLIP_01126;Name=crp;dbxref=COG:COG0664;gene=crp;inference=ab initio prediction:Prodigal:2.6,similar to AA sequence:UniProtKB:P29281;locus_tag=GNDLBLIP_01126;product=cAMP-activated global transcriptional regulator CRP
33958	Prodigal:2.6	CDS	937991	938242	.	+	0	ID=GNDLBLIP_01127;inference=ab initio prediction:Prodigal:2.6;locus_tag=GNDLBLIP_01127;product=hypothetical protein
33958	Prodigal:2.6	CDS	938397	938954	.	+	0	ID=GNDLBLIP_01128;eC_number=1.9.3.1;Name=ccoN1_2;dbxref=COG:COG3278;gene=ccoN1_2;inference=ab initio prediction:Prodigal:2.6,similar to AA sequence:UniProtKB:D9IA43;locus_tag=GNDLBLIP_01128;product=Cbb3-type cytochrome c oxidase subunit CcoN1
33958	Prodigal:2.6	CDS	938990	939223	.	+	0	ID=GNDLBLIP_01129;eC_number=1.9.3.1;Name=ccoN1_3;dbxref=COG:COG3278;gene=ccoN1_3;inference=ab initio prediction:Prodigal:2.6,similar to AA sequence:UniProtKB:D9IA43;locus_tag=GNDLBLIP_01129;product=Cbb3-type cytochrome c oxidase subunit CcoN1
33958	Prodigal:2.6	CDS	939181	939657	.	+	0	ID=GNDLBLIP_01130;eC_number=1.9.3.1;Name=ccoN1_4;dbxref=COG:COG3278;gene=ccoN1_4;inference=ab initio prediction:Prodigal:2.6,similar to AA sequence:UniProtKB:D9IA43;locus_tag=GNDLBLIP_01130;product=Cbb3-type cytochrome c oxidase subunit CcoN1
33958	Prodigal:2.6	CDS	939719	940366	.	+	0	ID=GNDLBLIP_01131;inference=ab initio prediction:Prodigal:2.6;locus_tag=GNDLBLIP_01131;product=hypothetical protein
33958	Prodigal:2.6	CDS	940476	940712	.	+	0	ID=GNDLBLIP_01132;inference=ab initio prediction:Prodigal:2.6;locus_tag=GNDLBLIP_01132;product=hypothetical protein
33958	Prodigal:2.6	CDS	940709	940969	.	+	0	ID=GNDLBLIP_01133;inference=ab initio prediction:Prodigal:2.6;locus_tag=GNDLBLIP_01133;product=hypothetical protein
33958	Prodigal:2.6	CDS	940980	941381	.	+	0	ID=GNDLBLIP_01134;inference=ab initio prediction:Prodigal:2.6;locus_tag=GNDLBLIP_01134;product=hypothetical protein
33958	Prodigal:2.6	CDS	941470	941838	.	+	0	ID=GNDLBLIP_01135;inference=ab initio prediction:Prodigal:2.6;locus_tag=GNDLBLIP_01135;product=hypothetical protein
33958	Prodigal:2.6	CDS	941957	942238	.	+	0	ID=GNDLBLIP_01136;inference=ab initio prediction:Prodigal:2.6;locus_tag=GNDLBLIP_01136;product=hypothetical protein
33958	Prodigal:2.6	CDS	942340	942669	.	+	0	ID=GNDLBLIP_01137;Name=clcA_3;gene=clcA_3;inference=ab initio prediction:Prodigal:2.6,protein motif:HAMAP:MF_01128;locus_tag=GNDLBLIP_01137;product=H(+)/Cl(-) exchange transporter ClcA
33958	Prodigal:2.6	CDS	942666	943151	.	+	0	ID=GNDLBLIP_01138;Name=clcA_4;dbxref=COG:COG0038;gene=clcA_4;inference=ab initio prediction:Prodigal:2.6,similar to AA sequence:UniProtKB:Q8ZRP8;locus_tag=GNDLBLIP_01138;product=H(+)/Cl(-) exchange transporter ClcA
33958	Prodigal:2.6	CDS	943965	944261	.	+	0	ID=GNDLBLIP_01139;inference=ab initio prediction:Prodigal:2.6;locus_tag=GNDLBLIP_01139;product=hypothetical protein
33958	Prodigal:2.6	CDS	944355	944918	.	+	0	ID=GNDLBLIP_01140;inference=ab initio prediction:Prodigal:2.6;locus_tag=GNDLBLIP_01140;product=hypothetical protein
33958	Prodigal:2.6	CDS	944928	945113	.	+	0	ID=GNDLBLIP_01141;inference=ab initio prediction:Prodigal:2.6;locus_tag=GNDLBLIP_01141;product=hypothetical protein
33958	Prodigal:2.6	CDS	945197	945508	.	+	0	ID=GNDLBLIP_01142;inference=ab initio prediction:Prodigal:2.6;locus_tag=GNDLBLIP_01142;product=hypothetical protein
33958	Prodigal:2.6	CDS	945586	945762	.	+	0	ID=GNDLBLIP_01143;inference=ab initio prediction:Prodigal:2.6;locus_tag=GNDLBLIP_01143;product=hypothetical protein
33958	Prodigal:2.6	CDS	945852	946211	.	+	0	ID=GNDLBLIP_01144;inference=ab initio prediction:Prodigal:2.6;locus_tag=GNDLBLIP_01144;product=hypothetical protein
33958	Prodigal:2.6	CDS	946232	946381	.	+	0	ID=GNDLBLIP_01145;inference=ab initio prediction:Prodigal:2.6;locus_tag=GNDLBLIP_01145;product=hypothetical protein
33958	Prodigal:2.6	CDS	946378	946845	.	+	0	ID=GNDLBLIP_01146;inference=ab initio prediction:Prodigal:2.6;locus_tag=GNDLBLIP_01146;product=hypothetical protein
33958	Prodigal:2.6	CDS	946835	947020	.	+	0	ID=GNDLBLIP_01147;inference=ab initio prediction:Prodigal:2.6;locus_tag=GNDLBLIP_01147;product=hypothetical protein
33958	Prodigal:2.6	CDS	947092	947814	.	+	0	ID=GNDLBLIP_01148;inference=ab initio prediction:Prodigal:2.6;locus_tag=GNDLBLIP_01148;product=hypothetical protein
33958	Prodigal:2.6	CDS	947811	948041	.	+	0	ID=GNDLBLIP_01149;inference=ab initio prediction:Prodigal:2.6;locus_tag=GNDLBLIP_01149;product=hypothetical protein
33958	Prodigal:2.6	CDS	948062	948577	.	+	0	ID=GNDLBLIP_01150;inference=ab initio prediction:Prodigal:2.6;locus_tag=GNDLBLIP_01150;product=hypothetical protein
33958	Prodigal:2.6	CDS	948577	948924	.	+	0	ID=GNDLBLIP_01151;inference=ab initio prediction:Prodigal:2.6;locus_tag=GNDLBLIP_01151;product=hypothetical protein
33958	Prodigal:2.6	CDS	948924	949118	.	+	0	ID=GNDLBLIP_01152;inference=ab initio prediction:Prodigal:2.6;locus_tag=GNDLBLIP_01152;product=hypothetical protein
33958	Prodigal:2.6	CDS	949336	949461	.	-	0	ID=GNDLBLIP_01153;inference=ab initio prediction:Prodigal:2.6;locus_tag=GNDLBLIP_01153;product=hypothetical protein
33958	Prodigal:2.6	CDS	949416	949682	.	-	0	ID=GNDLBLIP_01154;inference=ab initio prediction:Prodigal:2.6;locus_tag=GNDLBLIP_01154;product=hypothetical protein
33958	Prodigal:2.6	CDS	950359	951471	.	+	0	ID=GNDLBLIP_01155;Name=susC_4;gene=susC_4;inference=ab initio prediction:Prodigal:2.6,similar to AA sequence:UniProtKB:Q8A1G1;locus_tag=GNDLBLIP_01155;product=TonB-dependent receptor SusC
33958	Prodigal:2.6	CDS	951776	952801	.	+	0	ID=GNDLBLIP_01156;Name=susC_5;gene=susC_5;inference=ab initio prediction:Prodigal:2.6,similar to AA sequence:UniProtKB:Q8A1G1;locus_tag=GNDLBLIP_01156;product=TonB-dependent receptor SusC
33958	Prodigal:2.6	CDS	952798	953190	.	+	0	ID=GNDLBLIP_01157;inference=ab initio prediction:Prodigal:2.6;locus_tag=GNDLBLIP_01157;product=hypothetical protein
33958	Prodigal:2.6	CDS	953215	954603	.	+	0	ID=GNDLBLIP_01158;inference=ab initio prediction:Prodigal:2.6;locus_tag=GNDLBLIP_01158;product=hypothetical protein
33958	Prodigal:2.6	CDS	954707	955408	.	+	0	ID=GNDLBLIP_01159;inference=ab initio prediction:Prodigal:2.6;locus_tag=GNDLBLIP_01159;product=hypothetical protein
33958	Prodigal:2.6	CDS	955405	957414	.	+	0	ID=GNDLBLIP_01160;eC_number=3.4.14.-;Name=dpp5_1;dbxref=COG:COG1506;gene=dpp5_1;inference=ab initio prediction:Prodigal:2.6,similar to AA sequence:UniProtKB:C3J8X2;locus_tag=GNDLBLIP_01160;product=Dipeptidyl-peptidase 5
33958	Prodigal:2.6	CDS	957606	957881	.	-	0	ID=GNDLBLIP_01161;inference=ab initio prediction:Prodigal:2.6;locus_tag=GNDLBLIP_01161;product=hypothetical protein
33958	Prodigal:2.6	CDS	957903	959045	.	-	0	ID=GNDLBLIP_01162;inference=ab initio prediction:Prodigal:2.6;locus_tag=GNDLBLIP_01162;product=hypothetical protein
33958	Prodigal:2.6	CDS	959062	959421	.	-	0	ID=GNDLBLIP_01163;inference=ab initio prediction:Prodigal:2.6;locus_tag=GNDLBLIP_01163;product=hypothetical protein
33958	Prodigal:2.6	CDS	959617	959844	.	-	0	ID=GNDLBLIP_01164;inference=ab initio prediction:Prodigal:2.6;locus_tag=GNDLBLIP_01164;product=hypothetical protein
33958	Prodigal:2.6	CDS	960150	960704	.	+	0	ID=GNDLBLIP_01165;inference=ab initio prediction:Prodigal:2.6;locus_tag=GNDLBLIP_01165;product=hypothetical protein
33958	Prodigal:2.6	CDS	960719	961795	.	+	0	ID=GNDLBLIP_01166;Name=rhaR_2;gene=rhaR_2;inference=ab initio prediction:Prodigal:2.6,protein motif:HAMAP:MF_01533;locus_tag=GNDLBLIP_01166;product=HTH-type transcriptional activator RhaR
33958	Prodigal:2.6	CDS	961864	962715	.	+	0	ID=GNDLBLIP_01167;inference=ab initio prediction:Prodigal:2.6;locus_tag=GNDLBLIP_01167;product=hypothetical protein
33958	Prodigal:2.6	CDS	962879	963139	.	+	0	ID=GNDLBLIP_01168;inference=ab initio prediction:Prodigal:2.6;locus_tag=GNDLBLIP_01168;product=hypothetical protein
33958	Prodigal:2.6	CDS	963159	963695	.	+	0	ID=GNDLBLIP_01169;inference=ab initio prediction:Prodigal:2.6;locus_tag=GNDLBLIP_01169;product=hypothetical protein
33958	Prodigal:2.6	CDS	963719	963970	.	+	0	ID=GNDLBLIP_01170;inference=ab initio prediction:Prodigal:2.6;locus_tag=GNDLBLIP_01170;product=hypothetical protein
33958	Prodigal:2.6	CDS	963973	964431	.	+	0	ID=GNDLBLIP_01171;inference=ab initio prediction:Prodigal:2.6;locus_tag=GNDLBLIP_01171;product=hypothetical protein
33958	Prodigal:2.6	CDS	964458	964679	.	+	0	ID=GNDLBLIP_01172;inference=ab initio prediction:Prodigal:2.6;locus_tag=GNDLBLIP_01172;product=hypothetical protein
33958	Prodigal:2.6	CDS	964736	964840	.	+	0	ID=GNDLBLIP_01173;inference=ab initio prediction:Prodigal:2.6;locus_tag=GNDLBLIP_01173;product=hypothetical protein
33958	Prodigal:2.6	CDS	965009	966106	.	+	0	ID=GNDLBLIP_01174;inference=ab initio prediction:Prodigal:2.6;locus_tag=GNDLBLIP_01174;product=hypothetical protein
33958	Prodigal:2.6	CDS	966528	967361	.	+	0	ID=GNDLBLIP_01175;inference=ab initio prediction:Prodigal:2.6;locus_tag=GNDLBLIP_01175;product=hypothetical protein
33958	Prodigal:2.6	CDS	967708	967902	.	-	0	ID=GNDLBLIP_01176;inference=ab initio prediction:Prodigal:2.6;locus_tag=GNDLBLIP_01176;product=hypothetical protein
33958	Prodigal:2.6	CDS	968367	968765	.	+	0	ID=GNDLBLIP_01177;Name=ssb_1;dbxref=COG:COG0629;gene=ssb_1;inference=ab initio prediction:Prodigal:2.6,similar to AA sequence:UniProtKB:Q9RY51;locus_tag=GNDLBLIP_01177;product=Single-stranded DNA-binding protein
33958	Prodigal:2.6	CDS	968799	969008	.	+	0	ID=GNDLBLIP_01178;inference=ab initio prediction:Prodigal:2.6;locus_tag=GNDLBLIP_01178;product=hypothetical protein
33958	Prodigal:2.6	CDS	969233	969697	.	+	0	ID=GNDLBLIP_01179;inference=ab initio prediction:Prodigal:2.6;locus_tag=GNDLBLIP_01179;product=hypothetical protein
33958	Prodigal:2.6	CDS	969709	969945	.	+	0	ID=GNDLBLIP_01180;inference=ab initio prediction:Prodigal:2.6;locus_tag=GNDLBLIP_01180;product=hypothetical protein
33958	Prodigal:2.6	CDS	969945	970262	.	+	0	ID=GNDLBLIP_01181;inference=ab initio prediction:Prodigal:2.6;locus_tag=GNDLBLIP_01181;product=hypothetical protein
33958	Prodigal:2.6	CDS	970259	970432	.	+	0	ID=GNDLBLIP_01182;inference=ab initio prediction:Prodigal:2.6;locus_tag=GNDLBLIP_01182;product=hypothetical protein
33958	Prodigal:2.6	CDS	970461	970679	.	+	0	ID=GNDLBLIP_01183;inference=ab initio prediction:Prodigal:2.6;locus_tag=GNDLBLIP_01183;product=hypothetical protein
33958	Prodigal:2.6	CDS	970757	971923	.	+	0	ID=GNDLBLIP_01184;inference=ab initio prediction:Prodigal:2.6;locus_tag=GNDLBLIP_01184;product=hypothetical protein
33958	Prodigal:2.6	CDS	971951	972661	.	+	0	ID=GNDLBLIP_01185;inference=ab initio prediction:Prodigal:2.6;locus_tag=GNDLBLIP_01185;product=hypothetical protein
33958	Prodigal:2.6	CDS	972658	972768	.	+	0	ID=GNDLBLIP_01186;inference=ab initio prediction:Prodigal:2.6;locus_tag=GNDLBLIP_01186;product=hypothetical protein
33958	Prodigal:2.6	CDS	972777	973463	.	+	0	ID=GNDLBLIP_01187;inference=ab initio prediction:Prodigal:2.6;locus_tag=GNDLBLIP_01187;product=hypothetical protein
33958	Prodigal:2.6	CDS	973649	974122	.	-	0	ID=GNDLBLIP_01188;inference=ab initio prediction:Prodigal:2.6;locus_tag=GNDLBLIP_01188;product=hypothetical protein
33958	Prodigal:2.6	CDS	975051	975242	.	-	0	ID=GNDLBLIP_01189;inference=ab initio prediction:Prodigal:2.6;locus_tag=GNDLBLIP_01189;product=hypothetical protein
33958	Prodigal:2.6	CDS	975536	975919	.	+	0	ID=GNDLBLIP_01190;inference=ab initio prediction:Prodigal:2.6;locus_tag=GNDLBLIP_01190;product=hypothetical protein
33958	Prodigal:2.6	CDS	975868	976575	.	+	0	ID=GNDLBLIP_01191;eC_number=3.1.-.-;Name=yhcG_1;dbxref=COG:COG4804;gene=yhcG_1;inference=ab initio prediction:Prodigal:2.6,similar to AA sequence:UniProtKB:P45423;locus_tag=GNDLBLIP_01191;product=Putative nuclease YhcG
33958	Prodigal:2.6	CDS	976700	976846	.	-	0	ID=GNDLBLIP_01192;inference=ab initio prediction:Prodigal:2.6;locus_tag=GNDLBLIP_01192;product=hypothetical protein
33958	Prodigal:2.6	CDS	976849	977070	.	-	0	ID=GNDLBLIP_01193;inference=ab initio prediction:Prodigal:2.6;locus_tag=GNDLBLIP_01193;product=hypothetical protein
33958	Prodigal:2.6	CDS	977192	977488	.	-	0	ID=GNDLBLIP_01194;inference=ab initio prediction:Prodigal:2.6;locus_tag=GNDLBLIP_01194;product=hypothetical protein
33958	Prodigal:2.6	CDS	977642	978331	.	-	0	ID=GNDLBLIP_01195;inference=ab initio prediction:Prodigal:2.6;locus_tag=GNDLBLIP_01195;product=hypothetical protein
33958	Prodigal:2.6	CDS	978481	978843	.	-	0	ID=GNDLBLIP_01196;inference=ab initio prediction:Prodigal:2.6;locus_tag=GNDLBLIP_01196;product=hypothetical protein
33958	Prodigal:2.6	CDS	979984	980343	.	+	0	ID=GNDLBLIP_01197;inference=ab initio prediction:Prodigal:2.6;locus_tag=GNDLBLIP_01197;product=hypothetical protein
33958	Prodigal:2.6	CDS	980340	981851	.	+	0	ID=GNDLBLIP_01198;inference=ab initio prediction:Prodigal:2.6;locus_tag=GNDLBLIP_01198;product=hypothetical protein
33958	Prodigal:2.6	CDS	981895	982548	.	+	0	ID=GNDLBLIP_01199;inference=ab initio prediction:Prodigal:2.6;locus_tag=GNDLBLIP_01199;product=hypothetical protein
33958	Prodigal:2.6	CDS	982587	983126	.	+	0	ID=GNDLBLIP_01200;inference=ab initio prediction:Prodigal:2.6;locus_tag=GNDLBLIP_01200;product=hypothetical protein
33958	Prodigal:2.6	CDS	983239	983559	.	+	0	ID=GNDLBLIP_01201;inference=ab initio prediction:Prodigal:2.6;locus_tag=GNDLBLIP_01201;product=hypothetical protein
33958	Prodigal:2.6	CDS	983563	983892	.	+	0	ID=GNDLBLIP_01202;inference=ab initio prediction:Prodigal:2.6;locus_tag=GNDLBLIP_01202;product=hypothetical protein
33958	Prodigal:2.6	CDS	983899	984753	.	+	0	ID=GNDLBLIP_01203;inference=ab initio prediction:Prodigal:2.6;locus_tag=GNDLBLIP_01203;product=hypothetical protein
33958	Prodigal:2.6	CDS	984716	986986	.	+	0	ID=GNDLBLIP_01204;Name=dnaJ_1;dbxref=COG:COG0484;gene=dnaJ_1;inference=ab initio prediction:Prodigal:2.6,similar to AA sequence:UniProtKB:O87778;locus_tag=GNDLBLIP_01204;product=Chaperone protein DnaJ
33958	Prodigal:2.6	CDS	986967	987626	.	+	0	ID=GNDLBLIP_01205;inference=ab initio prediction:Prodigal:2.6;locus_tag=GNDLBLIP_01205;product=hypothetical protein
33958	Prodigal:2.6	CDS	987636	988358	.	+	0	ID=GNDLBLIP_01206;inference=ab initio prediction:Prodigal:2.6;locus_tag=GNDLBLIP_01206;product=hypothetical protein
33958	Prodigal:2.6	CDS	988365	989030	.	+	0	ID=GNDLBLIP_01207;inference=ab initio prediction:Prodigal:2.6;locus_tag=GNDLBLIP_01207;product=hypothetical protein
33958	Prodigal:2.6	CDS	989034	989864	.	+	0	ID=GNDLBLIP_01208;inference=ab initio prediction:Prodigal:2.6;locus_tag=GNDLBLIP_01208;product=hypothetical protein
33958	Prodigal:2.6	CDS	989867	991102	.	+	0	ID=GNDLBLIP_01209;inference=ab initio prediction:Prodigal:2.6;locus_tag=GNDLBLIP_01209;product=hypothetical protein
33958	Prodigal:2.6	CDS	991144	991758	.	+	0	ID=GNDLBLIP_01210;inference=ab initio prediction:Prodigal:2.6;locus_tag=GNDLBLIP_01210;product=hypothetical protein
33958	Prodigal:2.6	CDS	991761	992114	.	+	0	ID=GNDLBLIP_01211;inference=ab initio prediction:Prodigal:2.6;locus_tag=GNDLBLIP_01211;product=hypothetical protein
33958	Prodigal:2.6	CDS	992366	993361	.	+	0	ID=GNDLBLIP_01212;inference=ab initio prediction:Prodigal:2.6;locus_tag=GNDLBLIP_01212;product=hypothetical protein
33958	Prodigal:2.6	CDS	993366	994142	.	+	0	ID=GNDLBLIP_01213;inference=ab initio prediction:Prodigal:2.6;locus_tag=GNDLBLIP_01213;product=hypothetical protein
33958	Prodigal:2.6	CDS	994145	994234	.	+	0	ID=GNDLBLIP_01214;inference=ab initio prediction:Prodigal:2.6;locus_tag=GNDLBLIP_01214;product=hypothetical protein
33958	Prodigal:2.6	CDS	994598	994957	.	+	0	ID=GNDLBLIP_01215;inference=ab initio prediction:Prodigal:2.6;locus_tag=GNDLBLIP_01215;product=hypothetical protein
33958	Prodigal:2.6	CDS	994954	996483	.	+	0	ID=GNDLBLIP_01216;inference=ab initio prediction:Prodigal:2.6;locus_tag=GNDLBLIP_01216;product=hypothetical protein
33958	Prodigal:2.6	CDS	996587	996817	.	+	0	ID=GNDLBLIP_01217;inference=ab initio prediction:Prodigal:2.6;locus_tag=GNDLBLIP_01217;product=hypothetical protein
33958	Prodigal:2.6	CDS	996951	997469	.	+	0	ID=GNDLBLIP_01218;eC_number=3.4.24.-;Name=mepM_2;dbxref=COG:COG0739;gene=mepM_2;inference=ab initio prediction:Prodigal:2.6,similar to AA sequence:UniProtKB:P0AFS9;locus_tag=GNDLBLIP_01218;product=Murein DD-endopeptidase MepM
33958	Prodigal:2.6	CDS	997481	998170	.	+	0	ID=GNDLBLIP_01219;inference=ab initio prediction:Prodigal:2.6;locus_tag=GNDLBLIP_01219;product=hypothetical protein
33958	Prodigal:2.6	CDS	998227	999174	.	+	0	ID=GNDLBLIP_01220;inference=ab initio prediction:Prodigal:2.6;locus_tag=GNDLBLIP_01220;product=hypothetical protein
33958	Prodigal:2.6	CDS	999404	999667	.	+	0	ID=GNDLBLIP_01221;inference=ab initio prediction:Prodigal:2.6;locus_tag=GNDLBLIP_01221;product=hypothetical protein
33958	Prodigal:2.6	CDS	999742	1000494	.	+	0	ID=GNDLBLIP_01222;inference=ab initio prediction:Prodigal:2.6;locus_tag=GNDLBLIP_01222;product=hypothetical protein
33958	Prodigal:2.6	CDS	1000566	1001246	.	+	0	ID=GNDLBLIP_01223;inference=ab initio prediction:Prodigal:2.6;locus_tag=GNDLBLIP_01223;product=hypothetical protein
33958	Prodigal:2.6	CDS	1001343	1002116	.	+	0	ID=GNDLBLIP_01224;inference=ab initio prediction:Prodigal:2.6;locus_tag=GNDLBLIP_01224;product=hypothetical protein
33958	Prodigal:2.6	CDS	1002251	1002694	.	+	0	ID=GNDLBLIP_01225;eC_number=2.1.1.297;Name=prmC_1;gene=prmC_1;inference=ab initio prediction:Prodigal:2.6,protein motif:HAMAP:MF_02126;locus_tag=GNDLBLIP_01225;product=Release factor glutamine methyltransferase
33958	Prodigal:2.6	CDS	1002655	1006389	.	+	0	ID=GNDLBLIP_01226;eC_number=3.6.4.-;Name=rapA_1;gene=rapA_1;inference=ab initio prediction:Prodigal:2.6,protein motif:HAMAP:MF_01821;locus_tag=GNDLBLIP_01226;product=RNA polymerase-associated protein RapA
33958	Prodigal:2.6	CDS	1006611	1007546	.	+	0	ID=GNDLBLIP_01227;inference=ab initio prediction:Prodigal:2.6;locus_tag=GNDLBLIP_01227;product=hypothetical protein
33958	Prodigal:2.6	CDS	1007654	1008019	.	+	0	ID=GNDLBLIP_01228;inference=ab initio prediction:Prodigal:2.6;locus_tag=GNDLBLIP_01228;product=hypothetical protein
33958	Prodigal:2.6	CDS	1008012	1009523	.	+	0	ID=GNDLBLIP_01229;inference=ab initio prediction:Prodigal:2.6;locus_tag=GNDLBLIP_01229;product=hypothetical protein
33958	Prodigal:2.6	CDS	1009577	1010467	.	+	0	ID=GNDLBLIP_01230;inference=ab initio prediction:Prodigal:2.6;locus_tag=GNDLBLIP_01230;product=hypothetical protein
33958	Aragorn:1.2	tRNA	1010824	1010898	.	+	.	ID=GNDLBLIP_01231;inference=COORDINATES:profile:Aragorn:1.2;locus_tag=GNDLBLIP_01231;product=tRNA-Asp(gtc)
33958	Prodigal:2.6	CDS	1010934	1011173	.	+	0	ID=GNDLBLIP_01232;inference=ab initio prediction:Prodigal:2.6,similar to AA sequence:UniProtKB:Q9KGL3;locus_tag=GNDLBLIP_01232;note=UPF0213 protein BH0048;product=hypothetical protein
33958	Prodigal:2.6	CDS	1011240	1011515	.	-	0	ID=GNDLBLIP_01233;inference=ab initio prediction:Prodigal:2.6;locus_tag=GNDLBLIP_01233;product=hypothetical protein
33958	Prodigal:2.6	CDS	1011734	1012870	.	+	0	ID=GNDLBLIP_01234;Name=cdhR;dbxref=COG:COG4977;gene=cdhR;inference=ab initio prediction:Prodigal:2.6,similar to AA sequence:UniProtKB:Q9HTH5;locus_tag=GNDLBLIP_01234;product=HTH-type transcriptional regulator CdhR
33958	Prodigal:2.6	CDS	1013045	1014739	.	+	0	ID=GNDLBLIP_01235;inference=ab initio prediction:Prodigal:2.6;locus_tag=GNDLBLIP_01235;product=hypothetical protein
33958	Prodigal:2.6	CDS	1015036	1015374	.	+	0	ID=GNDLBLIP_01236;inference=ab initio prediction:Prodigal:2.6;locus_tag=GNDLBLIP_01236;product=hypothetical protein
33958	Prodigal:2.6	CDS	1015343	1015516	.	+	0	ID=GNDLBLIP_01237;inference=ab initio prediction:Prodigal:2.6;locus_tag=GNDLBLIP_01237;product=hypothetical protein
33958	Prodigal:2.6	CDS	1015617	1015841	.	+	0	ID=GNDLBLIP_01238;inference=ab initio prediction:Prodigal:2.6;locus_tag=GNDLBLIP_01238;product=hypothetical protein
33958	Prodigal:2.6	CDS	1015901	1016773	.	+	0	ID=GNDLBLIP_01239;Name=flp_4;gene=flp_4;inference=ab initio prediction:Prodigal:2.6,similar to AA sequence:UniProtKB:Q7A3Q5;locus_tag=GNDLBLIP_01239;product=Protein flp
33958	Prodigal:2.6	CDS	1016794	1017009	.	+	0	ID=GNDLBLIP_01240;inference=ab initio prediction:Prodigal:2.6;locus_tag=GNDLBLIP_01240;product=hypothetical protein
33958	Prodigal:2.6	CDS	1017790	1018176	.	+	0	ID=GNDLBLIP_01241;Name=cheY;dbxref=COG:COG0784;gene=cheY;inference=ab initio prediction:Prodigal:2.6,similar to AA sequence:UniProtKB:Q56312;locus_tag=GNDLBLIP_01241;product=Chemotaxis protein CheY
33958	Prodigal:2.6	CDS	1018212	1018460	.	+	0	ID=GNDLBLIP_01242;dbxref=COG:COG2771;inference=ab initio prediction:Prodigal:2.6,similar to AA sequence:UniProtKB:P9WMG1;locus_tag=GNDLBLIP_01242;product=Putative HTH-type transcriptional regulator
33958	Prodigal:2.6	CDS	1018479	1019021	.	+	0	ID=GNDLBLIP_01243;inference=ab initio prediction:Prodigal:2.6;locus_tag=GNDLBLIP_01243;product=hypothetical protein
33958	Prodigal:2.6	CDS	1019032	1019454	.	+	0	ID=GNDLBLIP_01244;inference=ab initio prediction:Prodigal:2.6;locus_tag=GNDLBLIP_01244;product=hypothetical protein
33958	Prodigal:2.6	CDS	1019575	1019793	.	+	0	ID=GNDLBLIP_01245;inference=ab initio prediction:Prodigal:2.6;locus_tag=GNDLBLIP_01245;product=hypothetical protein
33958	Prodigal:2.6	CDS	1019762	1020490	.	+	0	ID=GNDLBLIP_01246;inference=ab initio prediction:Prodigal:2.6;locus_tag=GNDLBLIP_01246;product=hypothetical protein
33958	Prodigal:2.6	CDS	1020516	1022882	.	+	0	ID=GNDLBLIP_01247;inference=ab initio prediction:Prodigal:2.6;locus_tag=GNDLBLIP_01247;product=hypothetical protein
33958	Prodigal:2.6	CDS	1023064	1023411	.	+	0	ID=GNDLBLIP_01248;inference=ab initio prediction:Prodigal:2.6;locus_tag=GNDLBLIP_01248;product=hypothetical protein
33958	Prodigal:2.6	CDS	1023511	1024344	.	+	0	ID=GNDLBLIP_01249;eC_number=4.2.2.-;Name=mltD;dbxref=COG:COG0741;gene=mltD;inference=ab initio prediction:Prodigal:2.6,similar to AA sequence:UniProtKB:P0AEZ7;locus_tag=GNDLBLIP_01249;product=Membrane-bound lytic murein transglycosylase D
33958	Prodigal:2.6	CDS	1024402	1024596	.	+	0	ID=GNDLBLIP_01250;inference=ab initio prediction:Prodigal:2.6;locus_tag=GNDLBLIP_01250;product=hypothetical protein
33958	Prodigal:2.6	CDS	1024931	1026082	.	+	0	ID=GNDLBLIP_01251;inference=ab initio prediction:Prodigal:2.6;locus_tag=GNDLBLIP_01251;product=hypothetical protein
33958	Prodigal:2.6	CDS	1026069	1026185	.	+	0	ID=GNDLBLIP_01252;inference=ab initio prediction:Prodigal:2.6;locus_tag=GNDLBLIP_01252;product=hypothetical protein
33958	Prodigal:2.6	CDS	1026191	1026763	.	+	0	ID=GNDLBLIP_01253;inference=ab initio prediction:Prodigal:2.6;locus_tag=GNDLBLIP_01253;product=hypothetical protein
33958	Prodigal:2.6	CDS	1026794	1027738	.	+	0	ID=GNDLBLIP_01254;inference=ab initio prediction:Prodigal:2.6;locus_tag=GNDLBLIP_01254;product=hypothetical protein
33958	Prodigal:2.6	CDS	1027793	1028656	.	+	0	ID=GNDLBLIP_01255;inference=ab initio prediction:Prodigal:2.6;locus_tag=GNDLBLIP_01255;product=hypothetical protein
33958	Prodigal:2.6	CDS	1028721	1029866	.	+	0	ID=GNDLBLIP_01256;inference=ab initio prediction:Prodigal:2.6;locus_tag=GNDLBLIP_01256;product=hypothetical protein
33958	Prodigal:2.6	CDS	1030014	1030460	.	+	0	ID=GNDLBLIP_01257;inference=ab initio prediction:Prodigal:2.6;locus_tag=GNDLBLIP_01257;product=hypothetical protein
33958	Prodigal:2.6	CDS	1030488	1031852	.	+	0	ID=GNDLBLIP_01258;inference=ab initio prediction:Prodigal:2.6;locus_tag=GNDLBLIP_01258;product=hypothetical protein
33958	Prodigal:2.6	CDS	1031975	1033159	.	+	0	ID=GNDLBLIP_01259;Name=clpB_1;gene=clpB_1;inference=ab initio prediction:Prodigal:2.6,similar to AA sequence:UniProtKB:Q7CEG6;locus_tag=GNDLBLIP_01259;product=Chaperone protein ClpB
33958	Prodigal:2.6	CDS	1033102	1034466	.	+	0	ID=GNDLBLIP_01260;Name=clpB_2;dbxref=COG:COG0542;gene=clpB_2;inference=ab initio prediction:Prodigal:2.6,similar to AA sequence:UniProtKB:P63284;locus_tag=GNDLBLIP_01260;product=Chaperone protein ClpB
33958	Prodigal:2.6	CDS	1034518	1034925	.	-	0	ID=GNDLBLIP_01261;inference=ab initio prediction:Prodigal:2.6;locus_tag=GNDLBLIP_01261;product=hypothetical protein
33958	Prodigal:2.6	CDS	1035194	1037170	.	+	0	ID=GNDLBLIP_01262;eC_number=6.3.2.-;Name=vgrG1_1;dbxref=COG:COG3501;gene=vgrG1_1;inference=ab initio prediction:Prodigal:2.6,similar to AA sequence:UniProtKB:Q9KS45;locus_tag=GNDLBLIP_01262;product=Actin cross-linking toxin VgrG1
33958	Prodigal:2.6	CDS	1037173	1038231	.	+	0	ID=GNDLBLIP_01263;inference=ab initio prediction:Prodigal:2.6;locus_tag=GNDLBLIP_01263;product=hypothetical protein
33958	Prodigal:2.6	CDS	1038252	1038818	.	+	0	ID=GNDLBLIP_01264;inference=ab initio prediction:Prodigal:2.6;locus_tag=GNDLBLIP_01264;product=hypothetical protein
33958	Prodigal:2.6	CDS	1038811	1039884	.	+	0	ID=GNDLBLIP_01265;inference=ab initio prediction:Prodigal:2.6;locus_tag=GNDLBLIP_01265;product=hypothetical protein
33958	Prodigal:2.6	CDS	1039910	1040890	.	+	0	ID=GNDLBLIP_01266;inference=ab initio prediction:Prodigal:2.6;locus_tag=GNDLBLIP_01266;product=hypothetical protein
33958	Prodigal:2.6	CDS	1040920	1041387	.	+	0	ID=GNDLBLIP_01267;inference=ab initio prediction:Prodigal:2.6;locus_tag=GNDLBLIP_01267;product=hypothetical protein
33958	Prodigal:2.6	CDS	1041392	1041655	.	+	0	ID=GNDLBLIP_01268;inference=ab initio prediction:Prodigal:2.6;locus_tag=GNDLBLIP_01268;product=hypothetical protein
33958	Prodigal:2.6	CDS	1041619	1042062	.	+	0	ID=GNDLBLIP_01269;inference=ab initio prediction:Prodigal:2.6;locus_tag=GNDLBLIP_01269;product=hypothetical protein
33958	Prodigal:2.6	CDS	1042121	1043953	.	+	0	ID=GNDLBLIP_01270;inference=ab initio prediction:Prodigal:2.6;locus_tag=GNDLBLIP_01270;product=hypothetical protein
33958	Prodigal:2.6	CDS	1044021	1044395	.	+	0	ID=GNDLBLIP_01271;inference=ab initio prediction:Prodigal:2.6;locus_tag=GNDLBLIP_01271;product=hypothetical protein
33958	Prodigal:2.6	CDS	1044377	1044853	.	+	0	ID=GNDLBLIP_01272;inference=ab initio prediction:Prodigal:2.6;locus_tag=GNDLBLIP_01272;product=hypothetical protein
33958	Prodigal:2.6	CDS	1044863	1045237	.	+	0	ID=GNDLBLIP_01273;inference=ab initio prediction:Prodigal:2.6;locus_tag=GNDLBLIP_01273;product=hypothetical protein
33958	Prodigal:2.6	CDS	1045315	1045446	.	+	0	ID=GNDLBLIP_01274;inference=ab initio prediction:Prodigal:2.6;locus_tag=GNDLBLIP_01274;product=hypothetical protein
33958	Prodigal:2.6	CDS	1045473	1045904	.	+	0	ID=GNDLBLIP_01275;inference=ab initio prediction:Prodigal:2.6;locus_tag=GNDLBLIP_01275;product=hypothetical protein
33958	Prodigal:2.6	CDS	1045934	1046092	.	+	0	ID=GNDLBLIP_01276;inference=ab initio prediction:Prodigal:2.6;locus_tag=GNDLBLIP_01276;product=hypothetical protein
33958	Prodigal:2.6	CDS	1046536	1047066	.	+	0	ID=GNDLBLIP_01277;inference=ab initio prediction:Prodigal:2.6;locus_tag=GNDLBLIP_01277;product=hypothetical protein
33958	Prodigal:2.6	CDS	1047024	1047437	.	+	0	ID=GNDLBLIP_01278;Name=yxeI;dbxref=COG:COG3049;gene=yxeI;inference=ab initio prediction:Prodigal:2.6,similar to AA sequence:UniProtKB:P54948;locus_tag=GNDLBLIP_01278;product=putative protein YxeI
33958	Prodigal:2.6	CDS	1047683	1048933	.	-	0	ID=GNDLBLIP_01279;eC_number=2.3.1.179;Name=fabF_2;dbxref=COG:COG0304;gene=fabF_2;inference=ab initio prediction:Prodigal:2.6,similar to AA sequence:UniProtKB:O34340;locus_tag=GNDLBLIP_01279;product=3-oxoacyl-[acyl-carrier-protein] synthase 2
33958	Prodigal:2.6	CDS	1048936	1049064	.	-	0	ID=GNDLBLIP_01280;inference=ab initio prediction:Prodigal:2.6;locus_tag=GNDLBLIP_01280;product=hypothetical protein
33958	Prodigal:2.6	CDS	1049040	1049486	.	-	0	ID=GNDLBLIP_01281;inference=ab initio prediction:Prodigal:2.6;locus_tag=GNDLBLIP_01281;product=hypothetical protein
33958	Prodigal:2.6	CDS	1049702	1050634	.	+	0	ID=GNDLBLIP_01282;eC_number=1.13.11.-;Name=mhqE;dbxref=COG:COG0346;gene=mhqE;inference=ab initio prediction:Prodigal:2.6,similar to AA sequence:UniProtKB:O34543;locus_tag=GNDLBLIP_01282;product=Putative ring-cleaving dioxygenase MhqE
33958	Prodigal:2.6	CDS	1050742	1051041	.	+	0	ID=GNDLBLIP_01283;Name=yjdJ_1;dbxref=COG:COG2388;gene=yjdJ_1;inference=ab initio prediction:Prodigal:2.6,similar to AA sequence:UniProtKB:P39274;locus_tag=GNDLBLIP_01283;product=putative protein YjdJ
33958	Prodigal:2.6	CDS	1051062	1052015	.	+	0	ID=GNDLBLIP_01284;eC_number=1.13.11.-;Name=mhqO;dbxref=COG:COG0346;gene=mhqO;inference=ab initio prediction:Prodigal:2.6,similar to AA sequence:UniProtKB:P96693;locus_tag=GNDLBLIP_01284;product=Putative ring-cleaving dioxygenase MhqO
33958	Prodigal:2.6	CDS	1052019	1052351	.	+	0	ID=GNDLBLIP_01285;inference=ab initio prediction:Prodigal:2.6;locus_tag=GNDLBLIP_01285;product=hypothetical protein
33958	Prodigal:2.6	CDS	1052701	1053051	.	+	0	ID=GNDLBLIP_01286;inference=ab initio prediction:Prodigal:2.6;locus_tag=GNDLBLIP_01286;product=hypothetical protein
33958	Prodigal:2.6	CDS	1053078	1054688	.	+	0	ID=GNDLBLIP_01287;Name=nhaK_1;dbxref=COG:COG0025;gene=nhaK_1;inference=ab initio prediction:Prodigal:2.6,similar to AA sequence:UniProtKB:O32212;locus_tag=GNDLBLIP_01287;product=Sodium%2C potassium%2C lithium and rubidium/H(+) antiporter
33958	Prodigal:2.6	CDS	1054695	1055027	.	+	0	ID=GNDLBLIP_01288;inference=ab initio prediction:Prodigal:2.6;locus_tag=GNDLBLIP_01288;product=hypothetical protein
33958	Prodigal:2.6	CDS	1055039	1055617	.	+	0	ID=GNDLBLIP_01289;inference=ab initio prediction:Prodigal:2.6;locus_tag=GNDLBLIP_01289;product=hypothetical protein
33958	Prodigal:2.6	CDS	1055701	1056630	.	+	0	ID=GNDLBLIP_01290;eC_number=1.13.11.24;Name=yhhW_3;dbxref=COG:COG1741;gene=yhhW_3;inference=ab initio prediction:Prodigal:2.6,similar to AA sequence:UniProtKB:P46852;locus_tag=GNDLBLIP_01290;product=Quercetin 2%2C3-dioxygenase
33958	Prodigal:2.6	CDS	1056940	1057209	.	+	0	ID=GNDLBLIP_01291;inference=ab initio prediction:Prodigal:2.6;locus_tag=GNDLBLIP_01291;product=hypothetical protein
33958	Prodigal:2.6	CDS	1058064	1058378	.	+	0	ID=GNDLBLIP_01292;inference=ab initio prediction:Prodigal:2.6;locus_tag=GNDLBLIP_01292;product=hypothetical protein
33958	Prodigal:2.6	CDS	1058375	1058743	.	+	0	ID=GNDLBLIP_01293;eC_number=4.-.-.-;Name=ycaC_1;dbxref=COG:COG1335;gene=ycaC_1;inference=ab initio prediction:Prodigal:2.6,similar to AA sequence:UniProtKB:P21367;locus_tag=GNDLBLIP_01293;product=putative hydrolase YcaC
33958	Prodigal:2.6	CDS	1058793	1059845	.	+	0	ID=GNDLBLIP_01294;eC_number=3.5.1.91;Name=nfdA;gene=nfdA;inference=ab initio prediction:Prodigal:2.6,similar to AA sequence:UniProtKB:Q68AP4;locus_tag=GNDLBLIP_01294;product=N-substituted formamide deformylase
33958	Prodigal:2.6	CDS	1059842	1060381	.	+	0	ID=GNDLBLIP_01295;inference=ab initio prediction:Prodigal:2.6;locus_tag=GNDLBLIP_01295;product=hypothetical protein
33958	Prodigal:2.6	CDS	1060375	1060566	.	+	0	ID=GNDLBLIP_01296;inference=ab initio prediction:Prodigal:2.6;locus_tag=GNDLBLIP_01296;product=hypothetical protein
33958	Prodigal:2.6	CDS	1060604	1061233	.	+	0	ID=GNDLBLIP_01297;eC_number=4.-.-.-;Name=ycaC_2;dbxref=COG:COG1335;gene=ycaC_2;inference=ab initio prediction:Prodigal:2.6,similar to AA sequence:UniProtKB:P21367;locus_tag=GNDLBLIP_01297;product=putative hydrolase YcaC
33958	Prodigal:2.6	CDS	1061284	1061682	.	+	0	ID=GNDLBLIP_01298;inference=ab initio prediction:Prodigal:2.6;locus_tag=GNDLBLIP_01298;product=hypothetical protein
33958	Prodigal:2.6	CDS	1062054	1063160	.	+	0	ID=GNDLBLIP_01299;inference=ab initio prediction:Prodigal:2.6;locus_tag=GNDLBLIP_01299;product=hypothetical protein
33958	Prodigal:2.6	CDS	1063172	1063921	.	+	0	ID=GNDLBLIP_01300;inference=ab initio prediction:Prodigal:2.6;locus_tag=GNDLBLIP_01300;product=hypothetical protein
33958	Prodigal:2.6	CDS	1064034	1064645	.	-	0	ID=GNDLBLIP_01301;inference=ab initio prediction:Prodigal:2.6;locus_tag=GNDLBLIP_01301;product=hypothetical protein
33958	Prodigal:2.6	CDS	1064663	1065493	.	-	0	ID=GNDLBLIP_01302;eC_number=3.2.1.103;inference=ab initio prediction:Prodigal:2.6,similar to AA sequence:UniProtKB:Q9ZG90;locus_tag=GNDLBLIP_01302;product=Keratan-sulfate endo-1%2C4-beta-galactosidase
33958	Prodigal:2.6	CDS	1065744	1066433	.	+	0	ID=GNDLBLIP_01303;eC_number=3.4.11.5;Name=pip;dbxref=COG:COG0596;gene=pip;inference=ab initio prediction:Prodigal:2.6,similar to AA sequence:UniProtKB:P52278;locus_tag=GNDLBLIP_01303;product=Proline iminopeptidase
33958	Prodigal:2.6	CDS	1066415	1066669	.	+	0	ID=GNDLBLIP_01304;inference=ab initio prediction:Prodigal:2.6;locus_tag=GNDLBLIP_01304;product=hypothetical protein
33958	Prodigal:2.6	CDS	1066724	1067371	.	+	0	ID=GNDLBLIP_01305;inference=ab initio prediction:Prodigal:2.6;locus_tag=GNDLBLIP_01305;product=hypothetical protein
33958	Prodigal:2.6	CDS	1067560	1068087	.	+	0	ID=GNDLBLIP_01306;inference=ab initio prediction:Prodigal:2.6;locus_tag=GNDLBLIP_01306;product=hypothetical protein
33958	Prodigal:2.6	CDS	1068084	1068662	.	+	0	ID=GNDLBLIP_01307;Name=ycf3_2;gene=ycf3_2;inference=ab initio prediction:Prodigal:2.6,protein motif:HAMAP:MF_00439;locus_tag=GNDLBLIP_01307;product=Photosystem I assembly protein Ycf3
33958	Prodigal:2.6	CDS	1069581	1069775	.	+	0	ID=GNDLBLIP_01308;inference=ab initio prediction:Prodigal:2.6;locus_tag=GNDLBLIP_01308;product=hypothetical protein
33958	Prodigal:2.6	CDS	1069903	1071750	.	+	0	ID=GNDLBLIP_01309;inference=ab initio prediction:Prodigal:2.6;locus_tag=GNDLBLIP_01309;product=hypothetical protein
33958	Prodigal:2.6	CDS	1071937	1073304	.	-	0	ID=GNDLBLIP_01310;Name=norG_2;dbxref=COG:COG1167;gene=norG_2;inference=ab initio prediction:Prodigal:2.6,similar to AA sequence:UniProtKB:Q2G1P1;locus_tag=GNDLBLIP_01310;product=HTH-type transcriptional regulator NorG
33958	Prodigal:2.6	CDS	1073400	1073630	.	+	0	ID=GNDLBLIP_01311;inference=ab initio prediction:Prodigal:2.6;locus_tag=GNDLBLIP_01311;product=hypothetical protein
33958	Prodigal:2.6	CDS	1073639	1073821	.	+	0	ID=GNDLBLIP_01312;inference=ab initio prediction:Prodigal:2.6;locus_tag=GNDLBLIP_01312;product=hypothetical protein
33958	Prodigal:2.6	CDS	1073830	1074198	.	+	0	ID=GNDLBLIP_01313;inference=ab initio prediction:Prodigal:2.6;locus_tag=GNDLBLIP_01313;product=hypothetical protein
33958	Prodigal:2.6	CDS	1074337	1074801	.	-	0	ID=GNDLBLIP_01314;eC_number=2.4.99.-;Name=lgt_1;dbxref=COG:COG0682;gene=lgt_1;inference=ab initio prediction:Prodigal:2.6,similar to AA sequence:UniProtKB:P60955;locus_tag=GNDLBLIP_01314;product=Prolipoprotein diacylglyceryl transferase
33958	Prodigal:2.6	CDS	1074761	1075177	.	-	0	ID=GNDLBLIP_01315;eC_number=2.4.99.-;Name=lgt_2;dbxref=COG:COG0682;gene=lgt_2;inference=ab initio prediction:Prodigal:2.6,similar to AA sequence:UniProtKB:P60955;locus_tag=GNDLBLIP_01315;product=Prolipoprotein diacylglyceryl transferase
33958	Prodigal:2.6	CDS	1075185	1075652	.	-	0	ID=GNDLBLIP_01316;inference=ab initio prediction:Prodigal:2.6;locus_tag=GNDLBLIP_01316;product=hypothetical protein
33958	Prodigal:2.6	CDS	1075702	1076781	.	-	0	ID=GNDLBLIP_01317;Name=pbpE_5;dbxref=COG:COG1680;gene=pbpE_5;inference=ab initio prediction:Prodigal:2.6,similar to AA sequence:UniProtKB:P32959;locus_tag=GNDLBLIP_01317;product=Penicillin-binding protein 4*
33958	Prodigal:2.6	CDS	1076913	1077851	.	-	0	ID=GNDLBLIP_01318;inference=ab initio prediction:Prodigal:2.6;locus_tag=GNDLBLIP_01318;product=hypothetical protein
33958	Prodigal:2.6	CDS	1078089	1078541	.	-	0	ID=GNDLBLIP_01319;inference=ab initio prediction:Prodigal:2.6;locus_tag=GNDLBLIP_01319;product=hypothetical protein
33958	Prodigal:2.6	CDS	1078766	1080298	.	-	0	ID=GNDLBLIP_01320;inference=ab initio prediction:Prodigal:2.6;locus_tag=GNDLBLIP_01320;product=hypothetical protein
33958	Prodigal:2.6	CDS	1080344	1081264	.	-	0	ID=GNDLBLIP_01321;inference=ab initio prediction:Prodigal:2.6;locus_tag=GNDLBLIP_01321;product=hypothetical protein
33958	Prodigal:2.6	CDS	1081569	1081862	.	-	0	ID=GNDLBLIP_01322;inference=ab initio prediction:Prodigal:2.6;locus_tag=GNDLBLIP_01322;product=hypothetical protein
33958	Prodigal:2.6	CDS	1081982	1082878	.	-	0	ID=GNDLBLIP_01323;inference=ab initio prediction:Prodigal:2.6;locus_tag=GNDLBLIP_01323;product=hypothetical protein
33958	Prodigal:2.6	CDS	1083016	1083474	.	-	0	ID=GNDLBLIP_01324;inference=ab initio prediction:Prodigal:2.6;locus_tag=GNDLBLIP_01324;product=hypothetical protein
33958	Prodigal:2.6	CDS	1083511	1083690	.	-	0	ID=GNDLBLIP_01325;inference=ab initio prediction:Prodigal:2.6;locus_tag=GNDLBLIP_01325;product=hypothetical protein
33958	Prodigal:2.6	CDS	1084335	1084970	.	+	0	ID=GNDLBLIP_01326;inference=ab initio prediction:Prodigal:2.6;locus_tag=GNDLBLIP_01326;product=hypothetical protein
33958	Prodigal:2.6	CDS	1084984	1086594	.	-	0	ID=GNDLBLIP_01327;inference=ab initio prediction:Prodigal:2.6;locus_tag=GNDLBLIP_01327;product=hypothetical protein
33958	Prodigal:2.6	CDS	1086636	1087679	.	-	0	ID=GNDLBLIP_01328;eC_number=3.1.3.8;Name=phy;dbxref=COG:COG4247;gene=phy;inference=ab initio prediction:Prodigal:2.6,similar to AA sequence:UniProtKB:P42094;locus_tag=GNDLBLIP_01328;product=3-phytase
33958	Prodigal:2.6	CDS	1087692	1088672	.	-	0	ID=GNDLBLIP_01329;inference=ab initio prediction:Prodigal:2.6;locus_tag=GNDLBLIP_01329;product=hypothetical protein
33958	Prodigal:2.6	CDS	1088657	1088953	.	-	0	ID=GNDLBLIP_01330;inference=ab initio prediction:Prodigal:2.6;locus_tag=GNDLBLIP_01330;product=hypothetical protein
33958	Prodigal:2.6	CDS	1089158	1091716	.	-	0	ID=GNDLBLIP_01331;inference=ab initio prediction:Prodigal:2.6;locus_tag=GNDLBLIP_01331;product=hypothetical protein
33958	Prodigal:2.6	CDS	1092065	1093111	.	-	0	ID=GNDLBLIP_01332;eC_number=1.1.1.2;Name=adhc1;dbxref=COG:COG1064;gene=adhc1;inference=ab initio prediction:Prodigal:2.6,similar to AA sequence:UniProtKB:P0CH36;locus_tag=GNDLBLIP_01332;product=NADP-dependent alcohol dehydrogenase C 1
33958	Prodigal:2.6	CDS	1093142	1093945	.	-	0	ID=GNDLBLIP_01333;Name=exsA_1;dbxref=COG:COG2207;gene=exsA_1;inference=ab initio prediction:Prodigal:2.6,similar to AA sequence:UniProtKB:P26993;locus_tag=GNDLBLIP_01333;product=Exoenzyme S synthesis regulatory protein ExsA
33958	Prodigal:2.6	CDS	1093963	1094181	.	-	0	ID=GNDLBLIP_01334;inference=ab initio prediction:Prodigal:2.6;locus_tag=GNDLBLIP_01334;product=hypothetical protein
33958	Prodigal:2.6	CDS	1094181	1094363	.	-	0	ID=GNDLBLIP_01335;inference=ab initio prediction:Prodigal:2.6;locus_tag=GNDLBLIP_01335;product=hypothetical protein
33958	Prodigal:2.6	CDS	1094442	1095230	.	-	0	ID=GNDLBLIP_01336;eC_number=1.-.-.-;inference=ab initio prediction:Prodigal:2.6,similar to AA sequence:UniProtKB:Q7A3L9;locus_tag=GNDLBLIP_01336;product=putative oxidoreductase
33958	Prodigal:2.6	CDS	1095421	1095801	.	+	0	ID=GNDLBLIP_01337;inference=ab initio prediction:Prodigal:2.6;locus_tag=GNDLBLIP_01337;product=hypothetical protein
33958	Prodigal:2.6	CDS	1095886	1096137	.	+	0	ID=GNDLBLIP_01338;inference=ab initio prediction:Prodigal:2.6;locus_tag=GNDLBLIP_01338;product=hypothetical protein
33958	Prodigal:2.6	CDS	1096134	1096574	.	+	0	ID=GNDLBLIP_01339;Name=ypmQ_2;dbxref=COG:COG1999;gene=ypmQ_2;inference=ab initio prediction:Prodigal:2.6,similar to AA sequence:UniProtKB:P54178;locus_tag=GNDLBLIP_01339;product=SCO1 protein
33958	Prodigal:2.6	CDS	1096640	1096822	.	+	0	ID=GNDLBLIP_01340;inference=ab initio prediction:Prodigal:2.6;locus_tag=GNDLBLIP_01340;product=hypothetical protein
33958	Prodigal:2.6	CDS	1096844	1097524	.	+	0	ID=GNDLBLIP_01341;eC_number=1.15.1.1;Name=sodA1;gene=sodA1;inference=ab initio prediction:Prodigal:2.6,similar to AA sequence:UniProtKB:P50058;locus_tag=GNDLBLIP_01341;product=Superoxide dismutase [Mn] 1
33958	Prodigal:2.6	CDS	1097595	1098317	.	-	0	ID=GNDLBLIP_01342;eC_number=3.1.1.-;Name=ytnP_1;dbxref=COG:COG0491;gene=ytnP_1;inference=ab initio prediction:Prodigal:2.6,similar to AA sequence:UniProtKB:O34760;locus_tag=GNDLBLIP_01342;product=putative quorum-quenching lactonase YtnP
33958	Prodigal:2.6	CDS	1098345	1099628	.	-	0	ID=GNDLBLIP_01343;Name=ynfM;gene=ynfM;inference=ab initio prediction:Prodigal:2.6,similar to AA sequence:UniProtKB:P43531;locus_tag=GNDLBLIP_01343;product=Inner membrane transport protein YnfM
33958	Prodigal:2.6	CDS	1099739	1100308	.	-	0	ID=GNDLBLIP_01344;Name=rclC_2;dbxref=COG:COG3059;gene=rclC_2;inference=ab initio prediction:Prodigal:2.6,similar to AA sequence:UniProtKB:P75685;locus_tag=GNDLBLIP_01344;product=Inner membrane protein RclC
33958	Prodigal:2.6	CDS	1100380	1101204	.	-	0	ID=GNDLBLIP_01345;Name=araC_2;gene=araC_2;inference=ab initio prediction:Prodigal:2.6,similar to AA sequence:UniProtKB:P0A9E0;locus_tag=GNDLBLIP_01345;product=Arabinose operon regulatory protein
33958	Prodigal:2.6	CDS	1101285	1101770	.	-	0	ID=GNDLBLIP_01346;eC_number=2.7.-.-;Name=eptA_1;dbxref=COG:COG2194;gene=eptA_1;inference=ab initio prediction:Prodigal:2.6,similar to AA sequence:UniProtKB:P36555;locus_tag=GNDLBLIP_01346;product=Phosphoethanolamine transferase EptA
33958	Prodigal:2.6	CDS	1101989	1102804	.	-	0	ID=GNDLBLIP_01347;eC_number=2.7.-.-;Name=eptA_2;dbxref=COG:COG2194;gene=eptA_2;inference=ab initio prediction:Prodigal:2.6,similar to AA sequence:UniProtKB:P36555;locus_tag=GNDLBLIP_01347;product=Phosphoethanolamine transferase EptA
33958	Prodigal:2.6	CDS	1102749	1103618	.	-	0	ID=GNDLBLIP_01348;inference=ab initio prediction:Prodigal:2.6;locus_tag=GNDLBLIP_01348;product=hypothetical protein
33958	Prodigal:2.6	CDS	1104196	1104855	.	+	0	ID=GNDLBLIP_01349;dbxref=COG:COG1629;inference=ab initio prediction:Prodigal:2.6,similar to AA sequence:UniProtKB:Q9JZN9;locus_tag=GNDLBLIP_01349;product=putative TonB-dependent receptor
33958	Prodigal:2.6	CDS	1104886	1106583	.	+	0	ID=GNDLBLIP_01350;dbxref=COG:COG1629;inference=ab initio prediction:Prodigal:2.6,similar to AA sequence:UniProtKB:Q9JZN9;locus_tag=GNDLBLIP_01350;product=putative TonB-dependent receptor
33958	Prodigal:2.6	CDS	1106831	1107019	.	+	0	ID=GNDLBLIP_01351;inference=ab initio prediction:Prodigal:2.6;locus_tag=GNDLBLIP_01351;product=hypothetical protein
33958	Prodigal:2.6	CDS	1107023	1107307	.	+	0	ID=GNDLBLIP_01352;inference=ab initio prediction:Prodigal:2.6;locus_tag=GNDLBLIP_01352;product=hypothetical protein
33958	Prodigal:2.6	CDS	1107342	1107713	.	-	0	ID=GNDLBLIP_01353;Name=zur;dbxref=COG:COG0735;gene=zur;inference=ab initio prediction:Prodigal:2.6,similar to AA sequence:UniProtKB:P0AC51;locus_tag=GNDLBLIP_01353;product=Zinc uptake regulation protein
33958	Prodigal:2.6	CDS	1107823	1108608	.	-	0	ID=GNDLBLIP_01354;inference=ab initio prediction:Prodigal:2.6;locus_tag=GNDLBLIP_01354;product=hypothetical protein
33958	Prodigal:2.6	CDS	1108605	1109699	.	-	0	ID=GNDLBLIP_01355;Name=czcA_1;gene=czcA_1;inference=ab initio prediction:Prodigal:2.6,similar to AA sequence:UniProtKB:P13511;locus_tag=GNDLBLIP_01355;product=Cobalt-zinc-cadmium resistance protein CzcA
33958	Prodigal:2.6	CDS	1109750	1110520	.	-	0	ID=GNDLBLIP_01356;Name=swrC;dbxref=COG:COG0841;gene=swrC;inference=ab initio prediction:Prodigal:2.6,similar to AA sequence:UniProtKB:O31501;locus_tag=GNDLBLIP_01356;product=Swarming motility protein SwrC
33958	Prodigal:2.6	CDS	1110709	1111593	.	-	0	ID=GNDLBLIP_01357;Name=mdtB;dbxref=COG:COG0841;gene=mdtB;inference=ab initio prediction:Prodigal:2.6,similar to AA sequence:UniProtKB:Q0TG15;locus_tag=GNDLBLIP_01357;product=Multidrug resistance protein MdtB
33958	Prodigal:2.6	CDS	1111611	1112561	.	-	0	ID=GNDLBLIP_01358;inference=ab initio prediction:Prodigal:2.6;locus_tag=GNDLBLIP_01358;product=hypothetical protein
33958	Prodigal:2.6	CDS	1112564	1113829	.	-	0	ID=GNDLBLIP_01359;inference=ab initio prediction:Prodigal:2.6;locus_tag=GNDLBLIP_01359;product=hypothetical protein
33958	Prodigal:2.6	CDS	1113968	1114420	.	-	0	ID=GNDLBLIP_01360;inference=ab initio prediction:Prodigal:2.6;locus_tag=GNDLBLIP_01360;product=hypothetical protein
33958	Prodigal:2.6	CDS	1114500	1115750	.	-	0	ID=GNDLBLIP_01361;eC_number=2.7.13.3;Name=yedV;dbxref=COG:COG0642;gene=yedV;inference=ab initio prediction:Prodigal:2.6,similar to AA sequence:UniProtKB:P76339;locus_tag=GNDLBLIP_01361;product=putative sensor-like histidine kinase YedV
33958	Prodigal:2.6	CDS	1115751	1116425	.	-	0	ID=GNDLBLIP_01362;Name=arlR;dbxref=COG:COG0745;gene=arlR;inference=ab initio prediction:Prodigal:2.6,similar to AA sequence:UniProtKB:Q9KJN4;locus_tag=GNDLBLIP_01362;product=Response regulator ArlR
33958	Prodigal:2.6	CDS	1116519	1116737	.	-	0	ID=GNDLBLIP_01363;inference=ab initio prediction:Prodigal:2.6;locus_tag=GNDLBLIP_01363;product=hypothetical protein
33958	Prodigal:2.6	CDS	1117066	1117338	.	+	0	ID=GNDLBLIP_01364;inference=ab initio prediction:Prodigal:2.6;locus_tag=GNDLBLIP_01364;product=hypothetical protein
33958	Prodigal:2.6	CDS	1117512	1118948	.	-	0	ID=GNDLBLIP_01365;Name=yccM_2;dbxref=COG:COG0348;gene=yccM_2;inference=ab initio prediction:Prodigal:2.6,similar to AA sequence:UniProtKB:P52636;locus_tag=GNDLBLIP_01365;product=Putative electron transport protein YccM
33958	Prodigal:2.6	CDS	1119319	1121766	.	+	0	ID=GNDLBLIP_01366;inference=ab initio prediction:Prodigal:2.6,similar to AA sequence:UniProtKB:Q1Q0T4;locus_tag=GNDLBLIP_01366;product=Hydrazine synthase subunit beta
33958	Prodigal:2.6	CDS	1121815	1122795	.	-	0	ID=GNDLBLIP_01367;eC_number=3.1.1.84;Name=cocE_2;gene=cocE_2;inference=ab initio prediction:Prodigal:2.6,similar to AA sequence:UniProtKB:Q9L9D7;locus_tag=GNDLBLIP_01367;product=Cocaine esterase
33958	Prodigal:2.6	CDS	1122828	1123667	.	-	0	ID=GNDLBLIP_01368;eC_number=3.1.1.84;Name=cocE_3;gene=cocE_3;inference=ab initio prediction:Prodigal:2.6,similar to AA sequence:UniProtKB:Q9L9D7;locus_tag=GNDLBLIP_01368;product=Cocaine esterase
33958	Prodigal:2.6	CDS	1124118	1124606	.	-	0	ID=GNDLBLIP_01369;inference=ab initio prediction:Prodigal:2.6;locus_tag=GNDLBLIP_01369;product=hypothetical protein
33958	Prodigal:2.6	CDS	1124685	1125446	.	-	0	ID=GNDLBLIP_01370;Name=rhaS_5;gene=rhaS_5;inference=ab initio prediction:Prodigal:2.6,protein motif:HAMAP:MF_01534;locus_tag=GNDLBLIP_01370;product=HTH-type transcriptional activator RhaS
33958	Prodigal:2.6	CDS	1125466	1126083	.	-	0	ID=GNDLBLIP_01371;inference=ab initio prediction:Prodigal:2.6;locus_tag=GNDLBLIP_01371;product=hypothetical protein
33958	Prodigal:2.6	CDS	1126083	1126418	.	-	0	ID=GNDLBLIP_01372;inference=ab initio prediction:Prodigal:2.6;locus_tag=GNDLBLIP_01372;product=hypothetical protein
33958	Prodigal:2.6	CDS	1127375	1127764	.	-	0	ID=GNDLBLIP_01373;inference=ab initio prediction:Prodigal:2.6;locus_tag=GNDLBLIP_01373;product=hypothetical protein
33958	Prodigal:2.6	CDS	1128121	1128936	.	+	0	ID=GNDLBLIP_01374;inference=ab initio prediction:Prodigal:2.6;locus_tag=GNDLBLIP_01374;product=hypothetical protein
33958	Prodigal:2.6	CDS	1128936	1129286	.	+	0	ID=GNDLBLIP_01375;Name=xerD_2;gene=xerD_2;inference=ab initio prediction:Prodigal:2.6,similar to AA sequence:UniProtKB:P0A0P0;locus_tag=GNDLBLIP_01375;product=Tyrosine recombinase XerD
33958	Prodigal:2.6	CDS	1129934	1130326	.	+	0	ID=GNDLBLIP_01376;Name=ssb_2;dbxref=COG:COG0629;gene=ssb_2;inference=ab initio prediction:Prodigal:2.6,similar to AA sequence:UniProtKB:Q9RY51;locus_tag=GNDLBLIP_01376;product=Single-stranded DNA-binding protein
33958	Prodigal:2.6	CDS	1130372	1131202	.	+	0	ID=GNDLBLIP_01377;inference=ab initio prediction:Prodigal:2.6;locus_tag=GNDLBLIP_01377;product=hypothetical protein
33958	Prodigal:2.6	CDS	1131184	1131444	.	+	0	ID=GNDLBLIP_01378;inference=ab initio prediction:Prodigal:2.6;locus_tag=GNDLBLIP_01378;product=hypothetical protein
33958	Prodigal:2.6	CDS	1131497	1131691	.	+	0	ID=GNDLBLIP_01379;inference=ab initio prediction:Prodigal:2.6;locus_tag=GNDLBLIP_01379;product=hypothetical protein
33958	Prodigal:2.6	CDS	1131718	1132056	.	+	0	ID=GNDLBLIP_01380;inference=ab initio prediction:Prodigal:2.6;locus_tag=GNDLBLIP_01380;product=hypothetical protein
33958	Prodigal:2.6	CDS	1132081	1132689	.	+	0	ID=GNDLBLIP_01381;inference=ab initio prediction:Prodigal:2.6;locus_tag=GNDLBLIP_01381;product=hypothetical protein
33958	Prodigal:2.6	CDS	1132707	1132925	.	+	0	ID=GNDLBLIP_01382;inference=ab initio prediction:Prodigal:2.6;locus_tag=GNDLBLIP_01382;product=hypothetical protein
33958	Prodigal:2.6	CDS	1132944	1133648	.	+	0	ID=GNDLBLIP_01383;inference=ab initio prediction:Prodigal:2.6;locus_tag=GNDLBLIP_01383;product=hypothetical protein
33958	Prodigal:2.6	CDS	1133645	1134106	.	+	0	ID=GNDLBLIP_01384;inference=ab initio prediction:Prodigal:2.6;locus_tag=GNDLBLIP_01384;product=hypothetical protein
33958	Prodigal:2.6	CDS	1134103	1134825	.	+	0	ID=GNDLBLIP_01385;inference=ab initio prediction:Prodigal:2.6;locus_tag=GNDLBLIP_01385;product=hypothetical protein
33958	Prodigal:2.6	CDS	1134822	1135628	.	+	0	ID=GNDLBLIP_01386;inference=ab initio prediction:Prodigal:2.6;locus_tag=GNDLBLIP_01386;product=hypothetical protein
33958	Prodigal:2.6	CDS	1135843	1136229	.	-	0	ID=GNDLBLIP_01387;inference=ab initio prediction:Prodigal:2.6;locus_tag=GNDLBLIP_01387;product=hypothetical protein
33958	Prodigal:2.6	CDS	1136512	1136811	.	-	0	ID=GNDLBLIP_01388;inference=ab initio prediction:Prodigal:2.6;locus_tag=GNDLBLIP_01388;product=hypothetical protein
33958	Prodigal:2.6	CDS	1136786	1137097	.	-	0	ID=GNDLBLIP_01389;inference=ab initio prediction:Prodigal:2.6;locus_tag=GNDLBLIP_01389;product=hypothetical protein
33958	Prodigal:2.6	CDS	1137239	1137682	.	-	0	ID=GNDLBLIP_01390;inference=ab initio prediction:Prodigal:2.6;locus_tag=GNDLBLIP_01390;product=hypothetical protein
33958	Prodigal:2.6	CDS	1137717	1137998	.	-	0	ID=GNDLBLIP_01391;inference=ab initio prediction:Prodigal:2.6;locus_tag=GNDLBLIP_01391;product=hypothetical protein
33958	Prodigal:2.6	CDS	1138113	1138562	.	-	0	ID=GNDLBLIP_01392;inference=ab initio prediction:Prodigal:2.6;locus_tag=GNDLBLIP_01392;product=hypothetical protein
33958	Prodigal:2.6	CDS	1138574	1139134	.	-	0	ID=GNDLBLIP_01393;inference=ab initio prediction:Prodigal:2.6;locus_tag=GNDLBLIP_01393;product=hypothetical protein
33958	Prodigal:2.6	CDS	1139156	1140034	.	-	0	ID=GNDLBLIP_01394;inference=ab initio prediction:Prodigal:2.6;locus_tag=GNDLBLIP_01394;product=hypothetical protein
33958	Prodigal:2.6	CDS	1140083	1141423	.	-	0	ID=GNDLBLIP_01395;inference=ab initio prediction:Prodigal:2.6;locus_tag=GNDLBLIP_01395;product=hypothetical protein
33958	Prodigal:2.6	CDS	1141410	1141697	.	-	0	ID=GNDLBLIP_01396;inference=ab initio prediction:Prodigal:2.6;locus_tag=GNDLBLIP_01396;product=hypothetical protein
33958	Prodigal:2.6	CDS	1141725	1142150	.	-	0	ID=GNDLBLIP_01397;inference=ab initio prediction:Prodigal:2.6;locus_tag=GNDLBLIP_01397;product=hypothetical protein
33958	Prodigal:2.6	CDS	1142162	1142785	.	-	0	ID=GNDLBLIP_01398;inference=ab initio prediction:Prodigal:2.6;locus_tag=GNDLBLIP_01398;product=hypothetical protein
33958	Prodigal:2.6	CDS	1142810	1143457	.	-	0	ID=GNDLBLIP_01399;inference=ab initio prediction:Prodigal:2.6;locus_tag=GNDLBLIP_01399;product=hypothetical protein
33958	Prodigal:2.6	CDS	1143441	1143806	.	-	0	ID=GNDLBLIP_01400;inference=ab initio prediction:Prodigal:2.6;locus_tag=GNDLBLIP_01400;product=hypothetical protein
33958	Prodigal:2.6	CDS	1143809	1144441	.	-	0	ID=GNDLBLIP_01401;inference=ab initio prediction:Prodigal:2.6;locus_tag=GNDLBLIP_01401;product=hypothetical protein
33958	Prodigal:2.6	CDS	1144469	1145602	.	-	0	ID=GNDLBLIP_01402;Name=traC_1;gene=traC_1;inference=ab initio prediction:Prodigal:2.6,similar to AA sequence:UniProtKB:P18004;locus_tag=GNDLBLIP_01402;product=Protein TraC
33958	Prodigal:2.6	CDS	1145596	1146969	.	-	0	ID=GNDLBLIP_01403;inference=ab initio prediction:Prodigal:2.6;locus_tag=GNDLBLIP_01403;product=hypothetical protein
33958	Prodigal:2.6	CDS	1146966	1147298	.	-	0	ID=GNDLBLIP_01404;inference=ab initio prediction:Prodigal:2.6;locus_tag=GNDLBLIP_01404;product=hypothetical protein
33958	Prodigal:2.6	CDS	1147311	1147616	.	-	0	ID=GNDLBLIP_01405;inference=ab initio prediction:Prodigal:2.6;locus_tag=GNDLBLIP_01405;product=hypothetical protein
33958	Prodigal:2.6	CDS	1147821	1148105	.	+	0	ID=GNDLBLIP_01406;inference=ab initio prediction:Prodigal:2.6;locus_tag=GNDLBLIP_01406;product=hypothetical protein
33958	Prodigal:2.6	CDS	1148163	1149368	.	+	0	ID=GNDLBLIP_01407;inference=ab initio prediction:Prodigal:2.6;locus_tag=GNDLBLIP_01407;product=hypothetical protein
33958	Prodigal:2.6	CDS	1149371	1151125	.	+	0	ID=GNDLBLIP_01408;inference=ab initio prediction:Prodigal:2.6;locus_tag=GNDLBLIP_01408;product=hypothetical protein
33958	Prodigal:2.6	CDS	1151163	1151717	.	-	0	ID=GNDLBLIP_01409;inference=ab initio prediction:Prodigal:2.6;locus_tag=GNDLBLIP_01409;product=hypothetical protein
33958	Prodigal:2.6	CDS	1151725	1152069	.	-	0	ID=GNDLBLIP_01410;inference=ab initio prediction:Prodigal:2.6;locus_tag=GNDLBLIP_01410;product=hypothetical protein
33958	Prodigal:2.6	CDS	1152081	1152518	.	-	0	ID=GNDLBLIP_01411;inference=ab initio prediction:Prodigal:2.6;locus_tag=GNDLBLIP_01411;product=hypothetical protein
33958	Prodigal:2.6	CDS	1152524	1153291	.	-	0	ID=GNDLBLIP_01412;inference=ab initio prediction:Prodigal:2.6,protein motif:HAMAP:MF_02040;locus_tag=GNDLBLIP_01412;product=Iron-sulfur cluster carrier protein
33958	Prodigal:2.6	CDS	1154030	1154473	.	+	0	ID=GNDLBLIP_01413;inference=ab initio prediction:Prodigal:2.6;locus_tag=GNDLBLIP_01413;product=hypothetical protein
33958	Prodigal:2.6	CDS	1154470	1155573	.	+	0	ID=GNDLBLIP_01414;inference=ab initio prediction:Prodigal:2.6;locus_tag=GNDLBLIP_01414;product=hypothetical protein
33958	Prodigal:2.6	CDS	1155570	1155761	.	+	0	ID=GNDLBLIP_01415;inference=ab initio prediction:Prodigal:2.6;locus_tag=GNDLBLIP_01415;product=hypothetical protein
33958	Prodigal:2.6	CDS	1155863	1156186	.	+	0	ID=GNDLBLIP_01416;inference=ab initio prediction:Prodigal:2.6;locus_tag=GNDLBLIP_01416;product=hypothetical protein
33958	Prodigal:2.6	CDS	1156183	1157244	.	+	0	ID=GNDLBLIP_01417;inference=ab initio prediction:Prodigal:2.6;locus_tag=GNDLBLIP_01417;product=hypothetical protein
33958	Prodigal:2.6	CDS	1157250	1157861	.	+	0	ID=GNDLBLIP_01418;inference=ab initio prediction:Prodigal:2.6;locus_tag=GNDLBLIP_01418;product=hypothetical protein
33958	Prodigal:2.6	CDS	1157972	1158382	.	+	0	ID=GNDLBLIP_01419;inference=ab initio prediction:Prodigal:2.6;locus_tag=GNDLBLIP_01419;product=hypothetical protein
33958	Prodigal:2.6	CDS	1158474	1158737	.	+	0	ID=GNDLBLIP_01420;inference=ab initio prediction:Prodigal:2.6;locus_tag=GNDLBLIP_01420;product=hypothetical protein
33958	Prodigal:2.6	CDS	1158857	1159540	.	+	0	ID=GNDLBLIP_01421;inference=ab initio prediction:Prodigal:2.6;locus_tag=GNDLBLIP_01421;product=hypothetical protein
33958	Prodigal:2.6	CDS	1159552	1160160	.	+	0	ID=GNDLBLIP_01422;inference=ab initio prediction:Prodigal:2.6;locus_tag=GNDLBLIP_01422;product=hypothetical protein
33958	Prodigal:2.6	CDS	1160182	1161909	.	+	0	ID=GNDLBLIP_01423;Name=czcA_2;gene=czcA_2;inference=ab initio prediction:Prodigal:2.6,similar to AA sequence:UniProtKB:P13511;locus_tag=GNDLBLIP_01423;product=Cobalt-zinc-cadmium resistance protein CzcA
33958	Prodigal:2.6	CDS	1161861	1164575	.	+	0	ID=GNDLBLIP_01424;Name=czcA_3;gene=czcA_3;inference=ab initio prediction:Prodigal:2.6,similar to AA sequence:UniProtKB:P13511;locus_tag=GNDLBLIP_01424;product=Cobalt-zinc-cadmium resistance protein CzcA
33958	Prodigal:2.6	CDS	1164596	1165459	.	+	0	ID=GNDLBLIP_01425;Name=czcB_1;gene=czcB_1;inference=ab initio prediction:Prodigal:2.6,similar to AA sequence:UniProtKB:P13510;locus_tag=GNDLBLIP_01425;product=Cobalt-zinc-cadmium resistance protein CzcB
33958	Prodigal:2.6	CDS	1165456	1165788	.	+	0	ID=GNDLBLIP_01426;inference=ab initio prediction:Prodigal:2.6;locus_tag=GNDLBLIP_01426;product=hypothetical protein
33958	Prodigal:2.6	CDS	1166003	1167841	.	+	0	ID=GNDLBLIP_01427;eC_number=3.6.3.-;Name=ctpC;dbxref=COG:COG2217;gene=ctpC;inference=ab initio prediction:Prodigal:2.6,similar to AA sequence:UniProtKB:P9WPT5;locus_tag=GNDLBLIP_01427;product=putative manganese/zinc-exporting P-type ATPase
33958	Prodigal:2.6	CDS	1167871	1168293	.	+	0	ID=GNDLBLIP_01428;inference=ab initio prediction:Prodigal:2.6;locus_tag=GNDLBLIP_01428;product=hypothetical protein
33958	Prodigal:2.6	CDS	1168750	1169058	.	+	0	ID=GNDLBLIP_01429;inference=ab initio prediction:Prodigal:2.6;locus_tag=GNDLBLIP_01429;product=hypothetical protein
33958	Prodigal:2.6	CDS	1169187	1171592	.	+	0	ID=GNDLBLIP_01430;Name=hemR_3;dbxref=COG:COG1629;gene=hemR_3;inference=ab initio prediction:Prodigal:2.6,similar to AA sequence:UniProtKB:P31499;locus_tag=GNDLBLIP_01430;product=Hemin receptor
33958	Prodigal:2.6	CDS	1171618	1172094	.	+	0	ID=GNDLBLIP_01431;inference=ab initio prediction:Prodigal:2.6;locus_tag=GNDLBLIP_01431;product=hypothetical protein
33958	Prodigal:2.6	CDS	1172713	1173939	.	+	0	ID=GNDLBLIP_01432;Name=entS_1;gene=entS_1;inference=ab initio prediction:Prodigal:2.6,protein motif:HAMAP:MF_01436;locus_tag=GNDLBLIP_01432;product=Enterobactin exporter EntS
33958	Prodigal:2.6	CDS	1173989	1174813	.	+	0	ID=GNDLBLIP_01433;inference=ab initio prediction:Prodigal:2.6;locus_tag=GNDLBLIP_01433;product=hypothetical protein
33958	Prodigal:2.6	CDS	1174915	1179033	.	-	0	ID=GNDLBLIP_01434;inference=ab initio prediction:Prodigal:2.6;locus_tag=GNDLBLIP_01434;product=hypothetical protein
33958	Prodigal:2.6	CDS	1178996	1179652	.	-	0	ID=GNDLBLIP_01435;inference=ab initio prediction:Prodigal:2.6;locus_tag=GNDLBLIP_01435;product=hypothetical protein
33958	Prodigal:2.6	CDS	1179858	1180346	.	-	0	ID=GNDLBLIP_01436;inference=ab initio prediction:Prodigal:2.6;locus_tag=GNDLBLIP_01436;product=hypothetical protein
33958	Prodigal:2.6	CDS	1180333	1180770	.	-	0	ID=GNDLBLIP_01437;inference=ab initio prediction:Prodigal:2.6;locus_tag=GNDLBLIP_01437;product=hypothetical protein
33958	Prodigal:2.6	CDS	1180957	1183086	.	+	0	ID=GNDLBLIP_01438;inference=ab initio prediction:Prodigal:2.6;locus_tag=GNDLBLIP_01438;product=hypothetical protein
33958	Prodigal:2.6	CDS	1183105	1183512	.	+	0	ID=GNDLBLIP_01439;inference=ab initio prediction:Prodigal:2.6;locus_tag=GNDLBLIP_01439;product=hypothetical protein
33958	Prodigal:2.6	CDS	1183467	1183862	.	+	0	ID=GNDLBLIP_01440;inference=ab initio prediction:Prodigal:2.6;locus_tag=GNDLBLIP_01440;product=hypothetical protein
33958	Prodigal:2.6	CDS	1183892	1186855	.	-	0	ID=GNDLBLIP_01441;eC_number=5.99.1.2;Name=topB_3;dbxref=COG:COG0550;gene=topB_3;inference=ab initio prediction:Prodigal:2.6,similar to AA sequence:UniProtKB:P14294;locus_tag=GNDLBLIP_01441;product=DNA topoisomerase 3
33958	Prodigal:2.6	CDS	1186858	1187568	.	-	0	ID=GNDLBLIP_01442;inference=ab initio prediction:Prodigal:2.6;locus_tag=GNDLBLIP_01442;product=hypothetical protein
33958	Prodigal:2.6	CDS	1187547	1188338	.	-	0	ID=GNDLBLIP_01443;inference=ab initio prediction:Prodigal:2.6;locus_tag=GNDLBLIP_01443;product=hypothetical protein
33958	Prodigal:2.6	CDS	1188438	1188731	.	-	0	ID=GNDLBLIP_01444;inference=ab initio prediction:Prodigal:2.6;locus_tag=GNDLBLIP_01444;product=hypothetical protein
33958	Prodigal:2.6	CDS	1188760	1189110	.	-	0	ID=GNDLBLIP_01445;inference=ab initio prediction:Prodigal:2.6;locus_tag=GNDLBLIP_01445;product=hypothetical protein
33958	Prodigal:2.6	CDS	1189583	1190221	.	-	0	ID=GNDLBLIP_01446;inference=ab initio prediction:Prodigal:2.6;locus_tag=GNDLBLIP_01446;product=hypothetical protein
33958	Prodigal:2.6	CDS	1190905	1191858	.	-	0	ID=GNDLBLIP_01447;inference=ab initio prediction:Prodigal:2.6;locus_tag=GNDLBLIP_01447;product=hypothetical protein
33958	Prodigal:2.6	CDS	1191869	1193608	.	-	0	ID=GNDLBLIP_01448;inference=ab initio prediction:Prodigal:2.6;locus_tag=GNDLBLIP_01448;product=hypothetical protein
33958	Prodigal:2.6	CDS	1193605	1193844	.	-	0	ID=GNDLBLIP_01449;inference=ab initio prediction:Prodigal:2.6;locus_tag=GNDLBLIP_01449;product=hypothetical protein
33958	Prodigal:2.6	CDS	1194529	1194831	.	+	0	ID=GNDLBLIP_01450;inference=ab initio prediction:Prodigal:2.6;locus_tag=GNDLBLIP_01450;product=hypothetical protein
33958	Prodigal:2.6	CDS	1194908	1196131	.	-	0	ID=GNDLBLIP_01451;inference=ab initio prediction:Prodigal:2.6;locus_tag=GNDLBLIP_01451;product=hypothetical protein
33958	Prodigal:2.6	CDS	1196186	1196356	.	-	0	ID=GNDLBLIP_01452;inference=ab initio prediction:Prodigal:2.6;locus_tag=GNDLBLIP_01452;product=hypothetical protein
33958	Prodigal:2.6	CDS	1196444	1196923	.	-	0	ID=GNDLBLIP_01453;inference=ab initio prediction:Prodigal:2.6;locus_tag=GNDLBLIP_01453;product=hypothetical protein
33958	Prodigal:2.6	CDS	1197102	1197539	.	-	0	ID=GNDLBLIP_01454;inference=ab initio prediction:Prodigal:2.6;locus_tag=GNDLBLIP_01454;product=hypothetical protein
33958	Prodigal:2.6	CDS	1197485	1197904	.	-	0	ID=GNDLBLIP_01455;inference=ab initio prediction:Prodigal:2.6;locus_tag=GNDLBLIP_01455;product=hypothetical protein
33958	Prodigal:2.6	CDS	1197922	1198074	.	-	0	ID=GNDLBLIP_01456;inference=ab initio prediction:Prodigal:2.6;locus_tag=GNDLBLIP_01456;product=hypothetical protein
33958	Prodigal:2.6	CDS	1198487	1199968	.	-	0	ID=GNDLBLIP_01457;inference=ab initio prediction:Prodigal:2.6;locus_tag=GNDLBLIP_01457;product=hypothetical protein
33958	Prodigal:2.6	CDS	1200281	1200607	.	-	0	ID=GNDLBLIP_01458;Name=sugE_1;dbxref=COG:COG2076;gene=sugE_1;inference=ab initio prediction:Prodigal:2.6,similar to AA sequence:UniProtKB:P69937;locus_tag=GNDLBLIP_01458;product=Quaternary ammonium compound-resistance protein SugE
33958	Prodigal:2.6	CDS	1200954	1201454	.	-	0	ID=GNDLBLIP_01459;eC_number=3.1.3.1;Name=phoA_1;dbxref=COG:COG1785;gene=phoA_1;inference=ab initio prediction:Prodigal:2.6,similar to AA sequence:UniProtKB:P19406;locus_tag=GNDLBLIP_01459;product=Alkaline phosphatase 4
33958	Prodigal:2.6	CDS	1201586	1201834	.	-	0	ID=GNDLBLIP_01460;eC_number=3.1.3.1;Name=phoA_2;dbxref=COG:COG1785;gene=phoA_2;inference=ab initio prediction:Prodigal:2.6,similar to AA sequence:UniProtKB:P19406;locus_tag=GNDLBLIP_01460;product=Alkaline phosphatase 4
33958	Prodigal:2.6	CDS	1201792	1202217	.	-	0	ID=GNDLBLIP_01461;inference=ab initio prediction:Prodigal:2.6;locus_tag=GNDLBLIP_01461;product=hypothetical protein
33958	Prodigal:2.6	CDS	1202678	1203514	.	-	0	ID=GNDLBLIP_01462;eC_number=1.6.99.1;Name=namA;dbxref=COG:COG1902;gene=namA;inference=ab initio prediction:Prodigal:2.6,similar to AA sequence:UniProtKB:P54550;locus_tag=GNDLBLIP_01462;product=NADPH dehydrogenase
33958	Prodigal:2.6	CDS	1203650	1203997	.	+	0	ID=GNDLBLIP_01463;Name=yybR_1;dbxref=COG:COG1733;gene=yybR_1;inference=ab initio prediction:Prodigal:2.6,similar to AA sequence:UniProtKB:P37486;locus_tag=GNDLBLIP_01463;product=putative HTH-type transcriptional regulator YybR
33958	Prodigal:2.6	CDS	1204012	1204377	.	-	0	ID=GNDLBLIP_01464;Name=ytcD_1;dbxref=COG:COG1733;gene=ytcD_1;inference=ab initio prediction:Prodigal:2.6,similar to AA sequence:UniProtKB:O34533;locus_tag=GNDLBLIP_01464;product=putative HTH-type transcriptional regulator YtcD
33958	Prodigal:2.6	CDS	1204477	1205985	.	-	0	ID=GNDLBLIP_01465;eC_number=3.5.4.40;Name=add2;dbxref=COG:COG1816;gene=add2;inference=ab initio prediction:Prodigal:2.6,similar to AA sequence:UniProtKB:Q82K09;locus_tag=GNDLBLIP_01465;product=Aminodeoxyfutalosine deaminase
33958	Prodigal:2.6	CDS	1206334	1206966	.	+	0	ID=GNDLBLIP_01466;eC_number=1.-.-.-;Name=yfkO;dbxref=COG:COG0778;gene=yfkO;inference=ab initio prediction:Prodigal:2.6,similar to AA sequence:UniProtKB:O34475;locus_tag=GNDLBLIP_01466;product=Putative NAD(P)H nitroreductase YfkO
33958	Prodigal:2.6	CDS	1207794	1208486	.	+	0	ID=GNDLBLIP_01467;inference=ab initio prediction:Prodigal:2.6;locus_tag=GNDLBLIP_01467;product=hypothetical protein
33958	Prodigal:2.6	CDS	1208691	1209122	.	+	0	ID=GNDLBLIP_01468;inference=ab initio prediction:Prodigal:2.6;locus_tag=GNDLBLIP_01468;product=hypothetical protein
33958	Prodigal:2.6	CDS	1209186	1209344	.	-	0	ID=GNDLBLIP_01469;inference=ab initio prediction:Prodigal:2.6;locus_tag=GNDLBLIP_01469;product=hypothetical protein
33958	Prodigal:2.6	CDS	1209356	1209982	.	-	0	ID=GNDLBLIP_01470;Name=nimR_2;gene=nimR_2;inference=ab initio prediction:Prodigal:2.6,similar to AA sequence:UniProtKB:P76241;locus_tag=GNDLBLIP_01470;product=HTH-type transcriptional regulator NimR
33958	Prodigal:2.6	CDS	1210116	1211438	.	+	0	ID=GNDLBLIP_01471;inference=ab initio prediction:Prodigal:2.6;locus_tag=GNDLBLIP_01471;product=hypothetical protein
33958	Prodigal:2.6	CDS	1211443	1214091	.	+	0	ID=GNDLBLIP_01472;Name=emrK_1;dbxref=COG:COG1566;gene=emrK_1;inference=ab initio prediction:Prodigal:2.6,similar to AA sequence:UniProtKB:P52599;locus_tag=GNDLBLIP_01472;product=putative multidrug resistance protein EmrK
33958	Prodigal:2.6	CDS	1214419	1215435	.	+	0	ID=GNDLBLIP_01473;inference=ab initio prediction:Prodigal:2.6;locus_tag=GNDLBLIP_01473;product=hypothetical protein
33958	Prodigal:2.6	CDS	1215582	1216298	.	+	0	ID=GNDLBLIP_01474;eC_number=2.7.13.3;Name=btsS_3;dbxref=COG:COG3275;gene=btsS_3;inference=ab initio prediction:Prodigal:2.6,similar to AA sequence:UniProtKB:P0AD14;locus_tag=GNDLBLIP_01474;product=Sensor histidine kinase BtsS
33958	Prodigal:2.6	CDS	1216298	1217038	.	+	0	ID=GNDLBLIP_01475;Name=btsR_2;dbxref=COG:COG3279;gene=btsR_2;inference=ab initio prediction:Prodigal:2.6,similar to AA sequence:UniProtKB:P0AFT5;locus_tag=GNDLBLIP_01475;product=Transcriptional regulatory protein BtsR
33958	Prodigal:2.6	CDS	1217096	1218220	.	-	0	ID=GNDLBLIP_01476;eC_number=3.5.3.12;Name=aguA_1;dbxref=COG:COG2957;gene=aguA_1;inference=ab initio prediction:Prodigal:2.6,similar to AA sequence:UniProtKB:Q9I6J9;locus_tag=GNDLBLIP_01476;product=Agmatine deiminase
33958	Prodigal:2.6	CDS	1218445	1218948	.	+	0	ID=GNDLBLIP_01477;inference=ab initio prediction:Prodigal:2.6;locus_tag=GNDLBLIP_01477;product=hypothetical protein
33958	Prodigal:2.6	CDS	1219002	1220072	.	-	0	ID=GNDLBLIP_01478;eC_number=1.14.13.107;Name=limB_1;gene=limB_1;inference=ab initio prediction:Prodigal:2.6,similar to AA sequence:UniProtKB:Q9EUT9;locus_tag=GNDLBLIP_01478;product=Limonene 1%2C2-monooxygenase
33958	Prodigal:2.6	CDS	1220149	1220682	.	-	0	ID=GNDLBLIP_01479;eC_number=1.5.1.36;Name=nfr1;dbxref=COG:COG0431;gene=nfr1;inference=ab initio prediction:Prodigal:2.6,similar to AA sequence:UniProtKB:Q74HL7;locus_tag=GNDLBLIP_01479;product=NADH-dependent flavin reductase subunit 1
33958	Prodigal:2.6	CDS	1221036	1221284	.	+	0	ID=GNDLBLIP_01480;inference=ab initio prediction:Prodigal:2.6;locus_tag=GNDLBLIP_01480;product=hypothetical protein
33958	Prodigal:2.6	CDS	1221497	1221655	.	+	0	ID=GNDLBLIP_01481;inference=ab initio prediction:Prodigal:2.6;locus_tag=GNDLBLIP_01481;product=hypothetical protein
33958	Prodigal:2.6	CDS	1221672	1221797	.	+	0	ID=GNDLBLIP_01482;inference=ab initio prediction:Prodigal:2.6;locus_tag=GNDLBLIP_01482;product=hypothetical protein
33958	Prodigal:2.6	CDS	1222005	1223846	.	+	0	ID=GNDLBLIP_01483;Name=susC_6;gene=susC_6;inference=ab initio prediction:Prodigal:2.6,similar to AA sequence:UniProtKB:Q8A1G1;locus_tag=GNDLBLIP_01483;product=TonB-dependent receptor SusC
33958	Prodigal:2.6	CDS	1223957	1225102	.	+	0	ID=GNDLBLIP_01484;inference=ab initio prediction:Prodigal:2.6;locus_tag=GNDLBLIP_01484;product=hypothetical protein
33958	Prodigal:2.6	CDS	1225129	1226745	.	+	0	ID=GNDLBLIP_01485;inference=ab initio prediction:Prodigal:2.6;locus_tag=GNDLBLIP_01485;product=hypothetical protein
33958	Prodigal:2.6	CDS	1226900	1227499	.	-	0	ID=GNDLBLIP_01486;inference=ab initio prediction:Prodigal:2.6;locus_tag=GNDLBLIP_01486;product=hypothetical protein
33958	Prodigal:2.6	CDS	1228120	1228323	.	-	0	ID=GNDLBLIP_01487;inference=ab initio prediction:Prodigal:2.6;locus_tag=GNDLBLIP_01487;product=hypothetical protein
33958	Prodigal:2.6	CDS	1228376	1228963	.	-	0	ID=GNDLBLIP_01488;inference=ab initio prediction:Prodigal:2.6;locus_tag=GNDLBLIP_01488;product=hypothetical protein
33958	Prodigal:2.6	CDS	1229405	1229872	.	-	0	ID=GNDLBLIP_01489;Name=nreC;dbxref=COG:COG2197;gene=nreC;inference=ab initio prediction:Prodigal:2.6,similar to AA sequence:UniProtKB:Q7WZY4;locus_tag=GNDLBLIP_01489;product=Oxygen regulatory protein NreC
33958	Prodigal:2.6	CDS	1229971	1230204	.	-	0	ID=GNDLBLIP_01490;inference=ab initio prediction:Prodigal:2.6;locus_tag=GNDLBLIP_01490;product=hypothetical protein
33958	Prodigal:2.6	CDS	1230648	1232045	.	-	0	ID=GNDLBLIP_01491;inference=ab initio prediction:Prodigal:2.6;locus_tag=GNDLBLIP_01491;product=hypothetical protein
33958	Prodigal:2.6	CDS	1232891	1233421	.	-	0	ID=GNDLBLIP_01492;inference=ab initio prediction:Prodigal:2.6;locus_tag=GNDLBLIP_01492;product=hypothetical protein
33958	Prodigal:2.6	CDS	1234182	1235897	.	+	0	ID=GNDLBLIP_01493;inference=ab initio prediction:Prodigal:2.6;locus_tag=GNDLBLIP_01493;product=hypothetical protein
33958	Prodigal:2.6	CDS	1236090	1237679	.	+	0	ID=GNDLBLIP_01494;eC_number=3.2.1.18;Name=nedA_2;gene=nedA_2;inference=ab initio prediction:Prodigal:2.6,similar to AA sequence:UniProtKB:Q02834;locus_tag=GNDLBLIP_01494;product=Sialidase
33958	Prodigal:2.6	CDS	1237792	1238313	.	-	0	ID=GNDLBLIP_01495;eC_number=2.1.1.144;Name=tam_2;gene=tam_2;inference=ab initio prediction:Prodigal:2.6,protein motif:HAMAP:MF_00560;locus_tag=GNDLBLIP_01495;product=Trans-aconitate 2-methyltransferase
33958	Prodigal:2.6	CDS	1238321	1239076	.	-	0	ID=GNDLBLIP_01496;eC_number=1.1.1.100;Name=fabG_1;gene=fabG_1;inference=ab initio prediction:Prodigal:2.6,similar to AA sequence:UniProtKB:P0A0H9;locus_tag=GNDLBLIP_01496;product=3-oxoacyl-[acyl-carrier-protein] reductase FabG
33958	Prodigal:2.6	CDS	1239253	1239612	.	-	0	ID=GNDLBLIP_01497;inference=ab initio prediction:Prodigal:2.6;locus_tag=GNDLBLIP_01497;product=hypothetical protein
33958	Prodigal:2.6	CDS	1239621	1240085	.	-	0	ID=GNDLBLIP_01498;inference=ab initio prediction:Prodigal:2.6;locus_tag=GNDLBLIP_01498;product=hypothetical protein
33958	Prodigal:2.6	CDS	1240064	1240705	.	-	0	ID=GNDLBLIP_01499;inference=ab initio prediction:Prodigal:2.6;locus_tag=GNDLBLIP_01499;product=hypothetical protein
33958	Prodigal:2.6	CDS	1240834	1242165	.	-	0	ID=GNDLBLIP_01500;Name=tlpA;dbxref=COG:COG0526;gene=tlpA;inference=ab initio prediction:Prodigal:2.6,similar to AA sequence:UniProtKB:P43221;locus_tag=GNDLBLIP_01500;product=Thiol:disulfide interchange protein TlpA
33958	Prodigal:2.6	CDS	1242207	1242797	.	-	0	ID=GNDLBLIP_01501;inference=ab initio prediction:Prodigal:2.6;locus_tag=GNDLBLIP_01501;product=hypothetical protein
33958	Prodigal:2.6	CDS	1242757	1243017	.	-	0	ID=GNDLBLIP_01502;inference=ab initio prediction:Prodigal:2.6;locus_tag=GNDLBLIP_01502;product=hypothetical protein
33958	Prodigal:2.6	CDS	1243022	1243783	.	-	0	ID=GNDLBLIP_01503;eC_number=3.6.3.-;dbxref=COG:COG1131;inference=ab initio prediction:Prodigal:2.6,similar to AA sequence:UniProtKB:P9WQL7;locus_tag=GNDLBLIP_01503;product=Fluoroquinolones export ATP-binding protein
33958	Prodigal:2.6	CDS	1243780	1243923	.	-	0	ID=GNDLBLIP_01504;inference=ab initio prediction:Prodigal:2.6;locus_tag=GNDLBLIP_01504;product=hypothetical protein
33958	Prodigal:2.6	CDS	1244178	1244393	.	-	0	ID=GNDLBLIP_01505;inference=ab initio prediction:Prodigal:2.6;locus_tag=GNDLBLIP_01505;product=hypothetical protein
33958	Prodigal:2.6	CDS	1244479	1244697	.	-	0	ID=GNDLBLIP_01506;inference=ab initio prediction:Prodigal:2.6;locus_tag=GNDLBLIP_01506;product=hypothetical protein
33958	Prodigal:2.6	CDS	1244938	1245504	.	-	0	ID=GNDLBLIP_01507;inference=ab initio prediction:Prodigal:2.6;locus_tag=GNDLBLIP_01507;product=hypothetical protein
33958	Prodigal:2.6	CDS	1246367	1246873	.	+	0	ID=GNDLBLIP_01508;inference=ab initio prediction:Prodigal:2.6;locus_tag=GNDLBLIP_01508;product=hypothetical protein
33958	Prodigal:2.6	CDS	1246975	1247133	.	+	0	ID=GNDLBLIP_01509;inference=ab initio prediction:Prodigal:2.6;locus_tag=GNDLBLIP_01509;product=hypothetical protein
33958	Prodigal:2.6	CDS	1247177	1248481	.	-	0	ID=GNDLBLIP_01510;eC_number=4.1.99.3;Name=phr;dbxref=COG:COG0415;gene=phr;inference=ab initio prediction:Prodigal:2.6,similar to AA sequence:UniProtKB:P05327;locus_tag=GNDLBLIP_01510;product=Deoxyribodipyrimidine photo-lyase
33958	Prodigal:2.6	CDS	1248471	1249028	.	-	0	ID=GNDLBLIP_01511;Name=blc;dbxref=COG:COG3040;gene=blc;inference=ab initio prediction:Prodigal:2.6,similar to AA sequence:UniProtKB:P0A901;locus_tag=GNDLBLIP_01511;product=Outer membrane lipoprotein Blc
33958	Prodigal:2.6	CDS	1249030	1249209	.	-	0	ID=GNDLBLIP_01512;inference=ab initio prediction:Prodigal:2.6;locus_tag=GNDLBLIP_01512;product=hypothetical protein
33958	Prodigal:2.6	CDS	1249290	1249697	.	-	0	ID=GNDLBLIP_01513;inference=ab initio prediction:Prodigal:2.6;locus_tag=GNDLBLIP_01513;product=hypothetical protein
33958	Prodigal:2.6	CDS	1249864	1250553	.	-	0	ID=GNDLBLIP_01514;inference=ab initio prediction:Prodigal:2.6;locus_tag=GNDLBLIP_01514;product=hypothetical protein
33958	Prodigal:2.6	CDS	1250541	1252142	.	-	0	ID=GNDLBLIP_01515;eC_number=3.2.1.52;Name=exoI_3;dbxref=COG:COG3525;gene=exoI_3;inference=ab initio prediction:Prodigal:2.6,similar to AA sequence:UniProtKB:P96155;locus_tag=GNDLBLIP_01515;product=Beta-hexosaminidase
33958	Prodigal:2.6	CDS	1252293	1252568	.	+	0	ID=GNDLBLIP_01516;inference=ab initio prediction:Prodigal:2.6;locus_tag=GNDLBLIP_01516;product=hypothetical protein
33958	Prodigal:2.6	CDS	1253092	1253835	.	+	0	ID=GNDLBLIP_01517;Name=rhaR_3;gene=rhaR_3;inference=ab initio prediction:Prodigal:2.6,protein motif:HAMAP:MF_01533;locus_tag=GNDLBLIP_01517;product=HTH-type transcriptional activator RhaR
33958	Prodigal:2.6	CDS	1253959	1254747	.	+	0	ID=GNDLBLIP_01518;eC_number=1.-.-.-;inference=ab initio prediction:Prodigal:2.6,similar to AA sequence:UniProtKB:Q7A3L9;locus_tag=GNDLBLIP_01518;product=putative oxidoreductase
33958	Prodigal:2.6	CDS	1254956	1255477	.	+	0	ID=GNDLBLIP_01519;inference=ab initio prediction:Prodigal:2.6;locus_tag=GNDLBLIP_01519;product=hypothetical protein
33958	Prodigal:2.6	CDS	1255705	1256118	.	-	0	ID=GNDLBLIP_01520;inference=ab initio prediction:Prodigal:2.6;locus_tag=GNDLBLIP_01520;product=hypothetical protein
33958	Prodigal:2.6	CDS	1256115	1256324	.	-	0	ID=GNDLBLIP_01521;inference=ab initio prediction:Prodigal:2.6;locus_tag=GNDLBLIP_01521;product=hypothetical protein
33958	Prodigal:2.6	CDS	1256420	1256833	.	-	0	ID=GNDLBLIP_01522;inference=ab initio prediction:Prodigal:2.6;locus_tag=GNDLBLIP_01522;product=hypothetical protein
33958	Prodigal:2.6	CDS	1256846	1257418	.	-	0	ID=GNDLBLIP_01523;inference=ab initio prediction:Prodigal:2.6;locus_tag=GNDLBLIP_01523;product=hypothetical protein
33958	Prodigal:2.6	CDS	1257509	1257889	.	-	0	ID=GNDLBLIP_01524;inference=ab initio prediction:Prodigal:2.6;locus_tag=GNDLBLIP_01524;product=hypothetical protein
33958	Prodigal:2.6	CDS	1257886	1258638	.	-	0	ID=GNDLBLIP_01525;inference=ab initio prediction:Prodigal:2.6;locus_tag=GNDLBLIP_01525;product=hypothetical protein
33958	Prodigal:2.6	CDS	1258864	1259649	.	-	0	ID=GNDLBLIP_01526;inference=ab initio prediction:Prodigal:2.6;locus_tag=GNDLBLIP_01526;product=hypothetical protein
33958	Prodigal:2.6	CDS	1259691	1260821	.	-	0	ID=GNDLBLIP_01527;inference=ab initio prediction:Prodigal:2.6;locus_tag=GNDLBLIP_01527;product=hypothetical protein
33958	Prodigal:2.6	CDS	1261073	1261486	.	-	0	ID=GNDLBLIP_01528;inference=ab initio prediction:Prodigal:2.6;locus_tag=GNDLBLIP_01528;product=hypothetical protein
33958	Prodigal:2.6	CDS	1261525	1261785	.	-	0	ID=GNDLBLIP_01529;inference=ab initio prediction:Prodigal:2.6;locus_tag=GNDLBLIP_01529;product=hypothetical protein
33958	Prodigal:2.6	CDS	1262022	1262282	.	-	0	ID=GNDLBLIP_01530;inference=ab initio prediction:Prodigal:2.6;locus_tag=GNDLBLIP_01530;product=hypothetical protein
33958	Prodigal:2.6	CDS	1262544	1264055	.	-	0	ID=GNDLBLIP_01531;eC_number=1.3.99.-;dbxref=COG:COG1960;inference=ab initio prediction:Prodigal:2.6,similar to AA sequence:UniProtKB:P9WQG1;locus_tag=GNDLBLIP_01531;product=putative acyl-CoA dehydrogenase fadE25
33958	Prodigal:2.6	CDS	1264340	1264624	.	-	0	ID=GNDLBLIP_01532;inference=ab initio prediction:Prodigal:2.6;locus_tag=GNDLBLIP_01532;product=hypothetical protein
33958	Prodigal:2.6	CDS	1264627	1265523	.	-	0	ID=GNDLBLIP_01533;inference=ab initio prediction:Prodigal:2.6;locus_tag=GNDLBLIP_01533;product=hypothetical protein
33958	Prodigal:2.6	CDS	1265586	1265927	.	-	0	ID=GNDLBLIP_01534;inference=ab initio prediction:Prodigal:2.6;locus_tag=GNDLBLIP_01534;product=hypothetical protein
33958	Prodigal:2.6	CDS	1265939	1266535	.	-	0	ID=GNDLBLIP_01535;eC_number=1.7.-.-;Name=azoR1;dbxref=COG:COG1182;gene=azoR1;inference=ab initio prediction:Prodigal:2.6,similar to AA sequence:UniProtKB:Q88IY3;locus_tag=GNDLBLIP_01535;product=FMN-dependent NADH-azoreductase 1
33958	Prodigal:2.6	CDS	1266823	1266969	.	+	0	ID=GNDLBLIP_01536;inference=ab initio prediction:Prodigal:2.6;locus_tag=GNDLBLIP_01536;product=hypothetical protein
33958	Prodigal:2.6	CDS	1267080	1267646	.	-	0	ID=GNDLBLIP_01537;inference=ab initio prediction:Prodigal:2.6;locus_tag=GNDLBLIP_01537;product=hypothetical protein
33958	Prodigal:2.6	CDS	1267703	1268269	.	-	0	ID=GNDLBLIP_01538;inference=ab initio prediction:Prodigal:2.6;locus_tag=GNDLBLIP_01538;product=hypothetical protein
33958	Prodigal:2.6	CDS	1268272	1269138	.	-	0	ID=GNDLBLIP_01539;eC_number=3.1.-.-;Name=besA_1;dbxref=COG:COG2819;gene=besA_1;inference=ab initio prediction:Prodigal:2.6,similar to AA sequence:UniProtKB:O32102;locus_tag=GNDLBLIP_01539;product=Ferri-bacillibactin esterase BesA
33958	Prodigal:2.6	CDS	1269240	1270004	.	-	0	ID=GNDLBLIP_01540;eC_number=3.4.11.18;Name=mapB;dbxref=COG:COG0024;gene=mapB;inference=ab initio prediction:Prodigal:2.6,similar to AA sequence:UniProtKB:O34484;locus_tag=GNDLBLIP_01540;product=Methionine aminopeptidase 2
33958	Prodigal:2.6	CDS	1270240	1270590	.	-	0	ID=GNDLBLIP_01541;eC_number=3.5.1.88;Name=def_2;dbxref=COG:COG0242;gene=def_2;inference=ab initio prediction:Prodigal:2.6,similar to AA sequence:UniProtKB:P43522;locus_tag=GNDLBLIP_01541;product=Peptide deformylase
33958	Prodigal:2.6	CDS	1271076	1271225	.	-	0	ID=GNDLBLIP_01542;inference=ab initio prediction:Prodigal:2.6;locus_tag=GNDLBLIP_01542;product=hypothetical protein
33958	Prodigal:2.6	CDS	1271397	1272224	.	-	0	ID=GNDLBLIP_01543;eC_number=1.1.1.-;Name=yvgN;dbxref=COG:COG0656;gene=yvgN;inference=ab initio prediction:Prodigal:2.6,similar to AA sequence:UniProtKB:O32210;locus_tag=GNDLBLIP_01543;product=Glyoxal reductase
33958	Prodigal:2.6	CDS	1272264	1272524	.	-	0	ID=GNDLBLIP_01544;eC_number=4.2.1.3;Name=citB_1;dbxref=COG:COG1048;gene=citB_1;inference=ab initio prediction:Prodigal:2.6,similar to AA sequence:UniProtKB:P09339;locus_tag=GNDLBLIP_01544;product=Aconitate hydratase A
33958	Prodigal:2.6	CDS	1272584	1275037	.	-	0	ID=GNDLBLIP_01545;eC_number=4.2.1.3;Name=citB_2;dbxref=COG:COG1048;gene=citB_2;inference=ab initio prediction:Prodigal:2.6,similar to AA sequence:UniProtKB:P09339;locus_tag=GNDLBLIP_01545;product=Aconitate hydratase A
33958	Prodigal:2.6	CDS	1275200	1275541	.	-	0	ID=GNDLBLIP_01546;inference=ab initio prediction:Prodigal:2.6;locus_tag=GNDLBLIP_01546;product=hypothetical protein
33958	Prodigal:2.6	CDS	1275953	1276459	.	-	0	ID=GNDLBLIP_01547;inference=ab initio prediction:Prodigal:2.6;locus_tag=GNDLBLIP_01547;product=hypothetical protein
33958	Prodigal:2.6	CDS	1276744	1277634	.	-	0	ID=GNDLBLIP_01548;eC_number=3.5.2.6;Name=per1_2;gene=per1_2;inference=ab initio prediction:Prodigal:2.6,similar to AA sequence:UniProtKB:P37321;locus_tag=GNDLBLIP_01548;product=Extended-spectrum beta-lactamase PER-1
33958	Prodigal:2.6	CDS	1278061	1279422	.	-	0	ID=GNDLBLIP_01549;eC_number=3.6.4.-;Name=rapA_2;gene=rapA_2;inference=ab initio prediction:Prodigal:2.6,protein motif:HAMAP:MF_01821;locus_tag=GNDLBLIP_01549;product=RNA polymerase-associated protein RapA
33958	Prodigal:2.6	CDS	1279509	1281371	.	-	0	ID=GNDLBLIP_01550;inference=ab initio prediction:Prodigal:2.6;locus_tag=GNDLBLIP_01550;product=hypothetical protein
33958	Prodigal:2.6	CDS	1281461	1282561	.	-	0	ID=GNDLBLIP_01551;eC_number=3.6.1.41;Name=apaH_1;gene=apaH_1;inference=ab initio prediction:Prodigal:2.6,protein motif:HAMAP:MF_00199;locus_tag=GNDLBLIP_01551;product=Bis(5'-nucleosyl)-tetraphosphatase%2C symmetrical
33958	Prodigal:2.6	CDS	1282970	1283581	.	+	0	ID=GNDLBLIP_01552;inference=ab initio prediction:Prodigal:2.6;locus_tag=GNDLBLIP_01552;product=hypothetical protein
33958	Prodigal:2.6	CDS	1283652	1284353	.	+	0	ID=GNDLBLIP_01553;inference=ab initio prediction:Prodigal:2.6;locus_tag=GNDLBLIP_01553;product=hypothetical protein
33958	Prodigal:2.6	CDS	1284491	1284997	.	-	0	ID=GNDLBLIP_01554;inference=ab initio prediction:Prodigal:2.6;locus_tag=GNDLBLIP_01554;product=hypothetical protein
33958	Prodigal:2.6	CDS	1285131	1285676	.	+	0	ID=GNDLBLIP_01555;inference=ab initio prediction:Prodigal:2.6;locus_tag=GNDLBLIP_01555;product=hypothetical protein
33958	Prodigal:2.6	CDS	1286211	1286489	.	+	0	ID=GNDLBLIP_01556;inference=ab initio prediction:Prodigal:2.6;locus_tag=GNDLBLIP_01556;product=hypothetical protein
33958	Prodigal:2.6	CDS	1287602	1288420	.	+	0	ID=GNDLBLIP_01557;inference=ab initio prediction:Prodigal:2.6;locus_tag=GNDLBLIP_01557;product=hypothetical protein
33958	Prodigal:2.6	CDS	1288524	1289453	.	-	0	ID=GNDLBLIP_01558;inference=ab initio prediction:Prodigal:2.6;locus_tag=GNDLBLIP_01558;product=hypothetical protein
33958	Prodigal:2.6	CDS	1289541	1290131	.	-	0	ID=GNDLBLIP_01559;eC_number=6.3.4.20;Name=queC;gene=queC;inference=ab initio prediction:Prodigal:2.6,protein motif:HAMAP:MF_01633;locus_tag=GNDLBLIP_01559;product=7-cyano-7-deazaguanine synthase
33958	Prodigal:2.6	CDS	1290128	1290448	.	-	0	ID=GNDLBLIP_01560;inference=ab initio prediction:Prodigal:2.6;locus_tag=GNDLBLIP_01560;product=hypothetical protein
33958	Prodigal:2.6	CDS	1290535	1291074	.	-	0	ID=GNDLBLIP_01561;inference=ab initio prediction:Prodigal:2.6;locus_tag=GNDLBLIP_01561;product=hypothetical protein
33958	Prodigal:2.6	CDS	1291095	1291316	.	-	0	ID=GNDLBLIP_01562;inference=ab initio prediction:Prodigal:2.6;locus_tag=GNDLBLIP_01562;product=hypothetical protein
33958	Prodigal:2.6	CDS	1291313	1291639	.	-	0	ID=GNDLBLIP_01563;inference=ab initio prediction:Prodigal:2.6;locus_tag=GNDLBLIP_01563;product=hypothetical protein
33958	Prodigal:2.6	CDS	1291720	1292697	.	-	0	ID=GNDLBLIP_01564;inference=ab initio prediction:Prodigal:2.6;locus_tag=GNDLBLIP_01564;product=hypothetical protein
33958	Prodigal:2.6	CDS	1292971	1293867	.	-	0	ID=GNDLBLIP_01565;Name=czcD;gene=czcD;inference=ab initio prediction:Prodigal:2.6,similar to AA sequence:UniProtKB:P13512;locus_tag=GNDLBLIP_01565;product=Metal cation efflux system protein CzcD
33958	Prodigal:2.6	CDS	1293879	1294697	.	-	0	ID=GNDLBLIP_01566;inference=ab initio prediction:Prodigal:2.6;locus_tag=GNDLBLIP_01566;product=hypothetical protein
33958	Prodigal:2.6	CDS	1295021	1296079	.	-	0	ID=GNDLBLIP_01567;Name=czcB_2;gene=czcB_2;inference=ab initio prediction:Prodigal:2.6,similar to AA sequence:UniProtKB:P13510;locus_tag=GNDLBLIP_01567;product=Cobalt-zinc-cadmium resistance protein CzcB
33958	Prodigal:2.6	CDS	1296278	1296979	.	-	0	ID=GNDLBLIP_01568;inference=ab initio prediction:Prodigal:2.6;locus_tag=GNDLBLIP_01568;product=hypothetical protein
33958	Prodigal:2.6	CDS	1296931	1297770	.	-	0	ID=GNDLBLIP_01569;Name=cnrA;gene=cnrA;inference=ab initio prediction:Prodigal:2.6,similar to AA sequence:UniProtKB:P37972;locus_tag=GNDLBLIP_01569;product=Nickel and cobalt resistance protein CnrA
33958	Prodigal:2.6	CDS	1297764	1299770	.	-	0	ID=GNDLBLIP_01570;Name=czcA_4;gene=czcA_4;inference=ab initio prediction:Prodigal:2.6,similar to AA sequence:UniProtKB:P13511;locus_tag=GNDLBLIP_01570;product=Cobalt-zinc-cadmium resistance protein CzcA
33958	Prodigal:2.6	CDS	1299899	1300276	.	-	0	ID=GNDLBLIP_01571;Name=czcA_5;gene=czcA_5;inference=ab initio prediction:Prodigal:2.6,similar to AA sequence:UniProtKB:P13511;locus_tag=GNDLBLIP_01571;product=Cobalt-zinc-cadmium resistance protein CzcA
33958	Prodigal:2.6	CDS	1301487	1301753	.	-	0	ID=GNDLBLIP_01572;inference=ab initio prediction:Prodigal:2.6;locus_tag=GNDLBLIP_01572;product=hypothetical protein
33958	Prodigal:2.6	CDS	1301846	1302580	.	-	0	ID=GNDLBLIP_01573;Name=pbpE_6;dbxref=COG:COG1680;gene=pbpE_6;inference=ab initio prediction:Prodigal:2.6,similar to AA sequence:UniProtKB:P32959;locus_tag=GNDLBLIP_01573;product=Penicillin-binding protein 4*
33958	Prodigal:2.6	CDS	1302606	1302998	.	-	0	ID=GNDLBLIP_01574;dbxref=COG:COG0346;inference=ab initio prediction:Prodigal:2.6,similar to AA sequence:UniProtKB:Q8ZM36;locus_tag=GNDLBLIP_01574;product=Virulence protein
33958	Prodigal:2.6	CDS	1303179	1304072	.	+	0	ID=GNDLBLIP_01575;inference=ab initio prediction:Prodigal:2.6;locus_tag=GNDLBLIP_01575;product=hypothetical protein
33958	Prodigal:2.6	CDS	1304156	1305304	.	-	0	ID=GNDLBLIP_01576;inference=ab initio prediction:Prodigal:2.6;locus_tag=GNDLBLIP_01576;product=hypothetical protein
33958	Prodigal:2.6	CDS	1305561	1308470	.	+	0	ID=GNDLBLIP_01577;Name=cirA_2;dbxref=COG:COG4771;gene=cirA_2;inference=ab initio prediction:Prodigal:2.6,similar to AA sequence:UniProtKB:P17315;locus_tag=GNDLBLIP_01577;product=Colicin I receptor
33958	Prodigal:2.6	CDS	1308480	1309304	.	+	0	ID=GNDLBLIP_01578;eC_number=3.1.3.48;Name=iphP;gene=iphP;inference=ab initio prediction:Prodigal:2.6,similar to AA sequence:UniProtKB:Q05918;locus_tag=GNDLBLIP_01578;product=Tyrosine-protein phosphatase
33958	Prodigal:2.6	CDS	1309867	1310910	.	+	0	ID=GNDLBLIP_01579;eC_number=3.1.-.-;Name=besA_2;dbxref=COG:COG2819;gene=besA_2;inference=ab initio prediction:Prodigal:2.6,similar to AA sequence:UniProtKB:O32102;locus_tag=GNDLBLIP_01579;product=Ferri-bacillibactin esterase BesA
33958	Prodigal:2.6	CDS	1311162	1313294	.	+	0	ID=GNDLBLIP_01580;inference=ab initio prediction:Prodigal:2.6;locus_tag=GNDLBLIP_01580;product=hypothetical protein
33958	Prodigal:2.6	CDS	1313324	1313950	.	+	0	ID=GNDLBLIP_01581;inference=ab initio prediction:Prodigal:2.6;locus_tag=GNDLBLIP_01581;product=hypothetical protein
33958	Prodigal:2.6	CDS	1313975	1315216	.	+	0	ID=GNDLBLIP_01582;inference=ab initio prediction:Prodigal:2.6;locus_tag=GNDLBLIP_01582;product=hypothetical protein
33958	Prodigal:2.6	CDS	1315218	1316312	.	+	0	ID=GNDLBLIP_01583;inference=ab initio prediction:Prodigal:2.6;locus_tag=GNDLBLIP_01583;product=hypothetical protein
33958	Prodigal:2.6	CDS	1316741	1317880	.	+	0	ID=GNDLBLIP_01584;eC_number=1.11.1.5;Name=ccp_2;dbxref=COG:COG1858;gene=ccp_2;inference=ab initio prediction:Prodigal:2.6,similar to AA sequence:UniProtKB:P55929;locus_tag=GNDLBLIP_01584;product=Cytochrome c551 peroxidase
33958	Prodigal:2.6	CDS	1318022	1318387	.	-	0	ID=GNDLBLIP_01585;inference=ab initio prediction:Prodigal:2.6;locus_tag=GNDLBLIP_01585;product=hypothetical protein
33958	Prodigal:2.6	CDS	1319241	1319411	.	+	0	ID=GNDLBLIP_01586;inference=ab initio prediction:Prodigal:2.6;locus_tag=GNDLBLIP_01586;product=hypothetical protein
33958	Prodigal:2.6	CDS	1320020	1321480	.	+	0	ID=GNDLBLIP_01587;inference=ab initio prediction:Prodigal:2.6;locus_tag=GNDLBLIP_01587;product=hypothetical protein
33958	Prodigal:2.6	CDS	1321704	1323197	.	-	0	ID=GNDLBLIP_01588;inference=ab initio prediction:Prodigal:2.6;locus_tag=GNDLBLIP_01588;product=hypothetical protein
33958	Prodigal:2.6	CDS	1323283	1323477	.	-	0	ID=GNDLBLIP_01589;inference=ab initio prediction:Prodigal:2.6;locus_tag=GNDLBLIP_01589;product=hypothetical protein
33958	Prodigal:2.6	CDS	1324071	1324868	.	+	0	ID=GNDLBLIP_01590;Name=tetD_1;gene=tetD_1;inference=ab initio prediction:Prodigal:2.6,similar to AA sequence:UniProtKB:P28816;locus_tag=GNDLBLIP_01590;product=Transposon Tn10 TetD protein
33958	Prodigal:2.6	CDS	1325054	1325275	.	+	0	ID=GNDLBLIP_01591;eC_number=3.5.3.12;Name=aguA_2;gene=aguA_2;inference=ab initio prediction:Prodigal:2.6,protein motif:HAMAP:MF_01841;locus_tag=GNDLBLIP_01591;product=Agmatine deiminase
33958	Prodigal:2.6	CDS	1325257	1325790	.	+	0	ID=GNDLBLIP_01592;eC_number=3.5.3.12;Name=aguA_3;dbxref=COG:COG2957;gene=aguA_3;inference=ab initio prediction:Prodigal:2.6,similar to AA sequence:UniProtKB:Q9I6J9;locus_tag=GNDLBLIP_01592;product=Agmatine deiminase
33958	Prodigal:2.6	CDS	1325844	1326164	.	+	0	ID=GNDLBLIP_01593;eC_number=3.5.3.12;Name=aguA_4;dbxref=COG:COG2957;gene=aguA_4;inference=ab initio prediction:Prodigal:2.6,similar to AA sequence:UniProtKB:Q8DW17;locus_tag=GNDLBLIP_01593;product=Putative agmatine deiminase
33958	Prodigal:2.6	CDS	1326212	1326511	.	-	0	ID=GNDLBLIP_01594;inference=ab initio prediction:Prodigal:2.6;locus_tag=GNDLBLIP_01594;product=hypothetical protein
33958	Prodigal:2.6	CDS	1326529	1326954	.	-	0	ID=GNDLBLIP_01595;inference=ab initio prediction:Prodigal:2.6;locus_tag=GNDLBLIP_01595;product=hypothetical protein
33958	Prodigal:2.6	CDS	1326964	1327236	.	-	0	ID=GNDLBLIP_01596;inference=ab initio prediction:Prodigal:2.6;locus_tag=GNDLBLIP_01596;product=hypothetical protein
33958	Prodigal:2.6	CDS	1327984	1329315	.	+	0	ID=GNDLBLIP_01597;eC_number=3.4.24.76;inference=ab initio prediction:Prodigal:2.6,similar to AA sequence:UniProtKB:Q47899;locus_tag=GNDLBLIP_01597;product=Flavastacin
33958	Prodigal:2.6	CDS	1329420	1329980	.	-	0	ID=GNDLBLIP_01598;inference=ab initio prediction:Prodigal:2.6;locus_tag=GNDLBLIP_01598;product=hypothetical protein
33958	Prodigal:2.6	CDS	1330056	1330970	.	-	0	ID=GNDLBLIP_01599;Name=chbR_2;gene=chbR_2;inference=ab initio prediction:Prodigal:2.6,similar to AA sequence:UniProtKB:P17410;locus_tag=GNDLBLIP_01599;product=HTH-type transcriptional regulator ChbR
33958	Prodigal:2.6	CDS	1331095	1331835	.	+	0	ID=GNDLBLIP_01600;Name=bdcA;dbxref=COG:COG1028;gene=bdcA;inference=ab initio prediction:Prodigal:2.6,similar to AA sequence:UniProtKB:P39333;locus_tag=GNDLBLIP_01600;product=Cyclic-di-GMP-binding biofilm dispersal mediator protein
33958	Prodigal:2.6	CDS	1331982	1333190	.	-	0	ID=GNDLBLIP_01601;Name=yciC;dbxref=COG:COG0523;gene=yciC;inference=ab initio prediction:Prodigal:2.6,similar to AA sequence:UniProtKB:P94400;locus_tag=GNDLBLIP_01601;product=Putative metal chaperone YciC
33958	Prodigal:2.6	CDS	1333471	1333788	.	-	0	ID=GNDLBLIP_01602;inference=ab initio prediction:Prodigal:2.6;locus_tag=GNDLBLIP_01602;product=hypothetical protein
33958	Prodigal:2.6	CDS	1334008	1334685	.	-	0	ID=GNDLBLIP_01603;inference=ab initio prediction:Prodigal:2.6;locus_tag=GNDLBLIP_01603;product=hypothetical protein
33958	Prodigal:2.6	CDS	1334809	1335234	.	-	0	ID=GNDLBLIP_01604;inference=ab initio prediction:Prodigal:2.6;locus_tag=GNDLBLIP_01604;product=hypothetical protein
33958	Prodigal:2.6	CDS	1335572	1335784	.	+	0	ID=GNDLBLIP_01605;eC_number=1.11.1.21;Name=katG_1;gene=katG_1;inference=ab initio prediction:Prodigal:2.6,similar to AA sequence:UniProtKB:P14412;locus_tag=GNDLBLIP_01605;product=Catalase-peroxidase
33958	Prodigal:2.6	CDS	1335805	1337175	.	+	0	ID=GNDLBLIP_01606;eC_number=1.11.1.21;Name=katG_2;gene=katG_2;inference=ab initio prediction:Prodigal:2.6,similar to AA sequence:UniProtKB:Q3JNW6;locus_tag=GNDLBLIP_01606;product=Catalase-peroxidase
33958	Prodigal:2.6	CDS	1337235	1337780	.	+	0	ID=GNDLBLIP_01607;eC_number=1.11.1.21;Name=katG_3;dbxref=COG:COG0376;gene=katG_3;inference=ab initio prediction:Prodigal:2.6,similar to AA sequence:UniProtKB:P13029;locus_tag=GNDLBLIP_01607;product=Catalase-peroxidase
33958	Prodigal:2.6	CDS	1338331	1338705	.	-	0	ID=GNDLBLIP_01608;inference=ab initio prediction:Prodigal:2.6;locus_tag=GNDLBLIP_01608;product=hypothetical protein
33958	Prodigal:2.6	CDS	1338747	1339499	.	-	0	ID=GNDLBLIP_01609;inference=ab initio prediction:Prodigal:2.6;locus_tag=GNDLBLIP_01609;product=hypothetical protein
33958	Prodigal:2.6	CDS	1339505	1341889	.	-	0	ID=GNDLBLIP_01610;Name=fhuA_3;dbxref=COG:COG1629;gene=fhuA_3;inference=ab initio prediction:Prodigal:2.6,similar to AA sequence:UniProtKB:P06971;locus_tag=GNDLBLIP_01610;product=Ferrichrome outer membrane transporter/phage receptor
33958	Prodigal:2.6	CDS	1341987	1342973	.	+	0	ID=GNDLBLIP_01611;Name=pchR_2;dbxref=COG:COG2207;gene=pchR_2;inference=ab initio prediction:Prodigal:2.6,similar to AA sequence:UniProtKB:P40883;locus_tag=GNDLBLIP_01611;product=Regulatory protein PchR
33958	Prodigal:2.6	CDS	1342992	1343090	.	-	0	ID=GNDLBLIP_01612;inference=ab initio prediction:Prodigal:2.6;locus_tag=GNDLBLIP_01612;product=hypothetical protein
33958	Prodigal:2.6	CDS	1343126	1343656	.	-	0	ID=GNDLBLIP_01613;Name=pchR_3;dbxref=COG:COG2207;gene=pchR_3;inference=ab initio prediction:Prodigal:2.6,similar to AA sequence:UniProtKB:P40883;locus_tag=GNDLBLIP_01613;product=Regulatory protein PchR
33958	Prodigal:2.6	CDS	1344374	1345195	.	+	0	ID=GNDLBLIP_01614;Name=viuB_1;dbxref=COG:COG2375;gene=viuB_1;inference=ab initio prediction:Prodigal:2.6,similar to AA sequence:UniProtKB:A5F660;locus_tag=GNDLBLIP_01614;product=Vibriobactin utilization protein ViuB
33958	Prodigal:2.6	CDS	1345202	1346608	.	+	0	ID=GNDLBLIP_01615;Name=mepA_1;gene=mepA_1;inference=ab initio prediction:Prodigal:2.6,similar to AA sequence:UniProtKB:Q7A7N0;locus_tag=GNDLBLIP_01615;product=Multidrug export protein MepA
33958	Prodigal:2.6	CDS	1346605	1346820	.	+	0	ID=GNDLBLIP_01616;inference=ab initio prediction:Prodigal:2.6;locus_tag=GNDLBLIP_01616;product=hypothetical protein
33958	Prodigal:2.6	CDS	1346769	1348724	.	+	0	ID=GNDLBLIP_01617;Name=fiu;dbxref=COG:COG4774;gene=fiu;inference=ab initio prediction:Prodigal:2.6,similar to AA sequence:UniProtKB:P75780;locus_tag=GNDLBLIP_01617;product=Catecholate siderophore receptor Fiu
33958	Prodigal:2.6	CDS	1349234	1349968	.	+	0	ID=GNDLBLIP_01618;inference=ab initio prediction:Prodigal:2.6;locus_tag=GNDLBLIP_01618;product=hypothetical protein
33958	Prodigal:2.6	CDS	1350081	1350803	.	+	0	ID=GNDLBLIP_01619;inference=ab initio prediction:Prodigal:2.6;locus_tag=GNDLBLIP_01619;product=hypothetical protein
33958	Prodigal:2.6	CDS	1350831	1351157	.	+	0	ID=GNDLBLIP_01620;Name=yvdD_1;dbxref=COG:COG1611;gene=yvdD_1;inference=ab initio prediction:Prodigal:2.6,similar to AA sequence:UniProtKB:O06986;locus_tag=GNDLBLIP_01620;product=LOG family protein YvdD
33958	Prodigal:2.6	CDS	1351154	1351534	.	+	0	ID=GNDLBLIP_01621;Name=yvdD_2;dbxref=COG:COG1611;gene=yvdD_2;inference=ab initio prediction:Prodigal:2.6,similar to AA sequence:UniProtKB:O06986;locus_tag=GNDLBLIP_01621;product=LOG family protein YvdD
33958	Prodigal:2.6	CDS	1351885	1352502	.	+	0	ID=GNDLBLIP_01622;Name=btr_2;dbxref=COG:COG0614;gene=btr_2;inference=ab initio prediction:Prodigal:2.6,similar to AA sequence:UniProtKB:P40408;locus_tag=GNDLBLIP_01622;product=HTH-type transcriptional activator Btr
33958	Prodigal:2.6	CDS	1352575	1353021	.	+	0	ID=GNDLBLIP_01623;inference=ab initio prediction:Prodigal:2.6;locus_tag=GNDLBLIP_01623;product=hypothetical protein
33958	Prodigal:2.6	CDS	1353066	1353335	.	+	0	ID=GNDLBLIP_01624;inference=ab initio prediction:Prodigal:2.6;locus_tag=GNDLBLIP_01624;product=hypothetical protein
33958	Prodigal:2.6	CDS	1353298	1353546	.	+	0	ID=GNDLBLIP_01625;inference=ab initio prediction:Prodigal:2.6;locus_tag=GNDLBLIP_01625;product=hypothetical protein
33958	Prodigal:2.6	CDS	1353926	1354492	.	+	0	ID=GNDLBLIP_01626;inference=ab initio prediction:Prodigal:2.6;locus_tag=GNDLBLIP_01626;product=hypothetical protein
33958	Prodigal:2.6	CDS	1354606	1355052	.	+	0	ID=GNDLBLIP_01627;eC_number=2.3.1.-;Name=ypeA_1;gene=ypeA_1;inference=ab initio prediction:Prodigal:2.6,protein motif:HAMAP:MF_01127;locus_tag=GNDLBLIP_01627;product=Acetyltransferase YpeA
33958	Prodigal:2.6	CDS	1355116	1355850	.	+	0	ID=GNDLBLIP_01628;dbxref=COG:COG0325;inference=ab initio prediction:Prodigal:2.6,similar to AA sequence:UniProtKB:P44506;locus_tag=GNDLBLIP_01628;product=Pyridoxal phosphate homeostasis protein
33958	Prodigal:2.6	CDS	1355984	1356949	.	-	0	ID=GNDLBLIP_01629;eC_number=1.1.1.394;Name=auaH_1;gene=auaH_1;inference=ab initio prediction:Prodigal:2.6,similar to AA sequence:UniProtKB:H1ZZB0;locus_tag=GNDLBLIP_01629;product=Aurachin B dehydrogenase
33958	Prodigal:2.6	CDS	1357015	1357590	.	-	0	ID=GNDLBLIP_01630;inference=ab initio prediction:Prodigal:2.6;locus_tag=GNDLBLIP_01630;product=hypothetical protein
33958	Prodigal:2.6	CDS	1357711	1358307	.	-	0	ID=GNDLBLIP_01631;inference=ab initio prediction:Prodigal:2.6;locus_tag=GNDLBLIP_01631;product=hypothetical protein
33958	Prodigal:2.6	CDS	1358334	1358507	.	-	0	ID=GNDLBLIP_01632;inference=ab initio prediction:Prodigal:2.6;locus_tag=GNDLBLIP_01632;product=hypothetical protein
33958	Prodigal:2.6	CDS	1358572	1358892	.	+	0	ID=GNDLBLIP_01633;Name=hxlR_2;dbxref=COG:COG1733;gene=hxlR_2;inference=ab initio prediction:Prodigal:2.6,similar to AA sequence:UniProtKB:P42406;locus_tag=GNDLBLIP_01633;product=HTH-type transcriptional activator HxlR
33958	Prodigal:2.6	CDS	1358925	1359668	.	+	0	ID=GNDLBLIP_01634;inference=ab initio prediction:Prodigal:2.6;locus_tag=GNDLBLIP_01634;product=hypothetical protein
33958	Prodigal:2.6	CDS	1359731	1360489	.	+	0	ID=GNDLBLIP_01635;inference=ab initio prediction:Prodigal:2.6;locus_tag=GNDLBLIP_01635;product=hypothetical protein
33958	Prodigal:2.6	CDS	1360655	1361347	.	-	0	ID=GNDLBLIP_01636;inference=ab initio prediction:Prodigal:2.6;locus_tag=GNDLBLIP_01636;product=hypothetical protein
33958	Prodigal:2.6	CDS	1361423	1361998	.	+	0	ID=GNDLBLIP_01637;inference=ab initio prediction:Prodigal:2.6;locus_tag=GNDLBLIP_01637;product=hypothetical protein
33958	Prodigal:2.6	CDS	1362003	1362464	.	-	0	ID=GNDLBLIP_01638;inference=ab initio prediction:Prodigal:2.6;locus_tag=GNDLBLIP_01638;product=hypothetical protein
33958	Prodigal:2.6	CDS	1362443	1362973	.	-	0	ID=GNDLBLIP_01639;inference=ab initio prediction:Prodigal:2.6;locus_tag=GNDLBLIP_01639;product=hypothetical protein
33958	Prodigal:2.6	CDS	1363255	1363365	.	+	0	ID=GNDLBLIP_01640;inference=ab initio prediction:Prodigal:2.6;locus_tag=GNDLBLIP_01640;product=hypothetical protein
33958	Prodigal:2.6	CDS	1363410	1364171	.	+	0	ID=GNDLBLIP_01641;Name=ycjY_1;dbxref=COG:COG1073;gene=ycjY_1;inference=ab initio prediction:Prodigal:2.6,similar to AA sequence:UniProtKB:P76049;locus_tag=GNDLBLIP_01641;product=putative protein YcjY
33958	Prodigal:2.6	CDS	1364246	1364413	.	+	0	ID=GNDLBLIP_01642;inference=ab initio prediction:Prodigal:2.6;locus_tag=GNDLBLIP_01642;product=hypothetical protein
33958	Prodigal:2.6	CDS	1364353	1365171	.	+	0	ID=GNDLBLIP_01643;Name=ycjY_2;dbxref=COG:COG1073;gene=ycjY_2;inference=ab initio prediction:Prodigal:2.6,similar to AA sequence:UniProtKB:P76049;locus_tag=GNDLBLIP_01643;product=putative protein YcjY
33958	Prodigal:2.6	CDS	1365173	1365583	.	+	0	ID=GNDLBLIP_01644;inference=ab initio prediction:Prodigal:2.6;locus_tag=GNDLBLIP_01644;product=hypothetical protein
33958	Prodigal:2.6	CDS	1365619	1366173	.	+	0	ID=GNDLBLIP_01645;inference=ab initio prediction:Prodigal:2.6;locus_tag=GNDLBLIP_01645;product=hypothetical protein
33958	Prodigal:2.6	CDS	1366365	1366841	.	+	0	ID=GNDLBLIP_01646;inference=ab initio prediction:Prodigal:2.6;locus_tag=GNDLBLIP_01646;product=hypothetical protein
33958	Prodigal:2.6	CDS	1366868	1367377	.	+	0	ID=GNDLBLIP_01647;inference=ab initio prediction:Prodigal:2.6;locus_tag=GNDLBLIP_01647;product=hypothetical protein
33958	Prodigal:2.6	CDS	1367374	1367889	.	+	0	ID=GNDLBLIP_01648;inference=ab initio prediction:Prodigal:2.6;locus_tag=GNDLBLIP_01648;product=hypothetical protein
33958	Prodigal:2.6	CDS	1368024	1368413	.	-	0	ID=GNDLBLIP_01649;inference=ab initio prediction:Prodigal:2.6;locus_tag=GNDLBLIP_01649;product=hypothetical protein
33958	Prodigal:2.6	CDS	1368424	1368846	.	-	0	ID=GNDLBLIP_01650;Name=ohrA;dbxref=COG:COG1764;gene=ohrA;inference=ab initio prediction:Prodigal:2.6,similar to AA sequence:UniProtKB:O34762;locus_tag=GNDLBLIP_01650;product=Organic hydroperoxide resistance protein OhrA
33958	Prodigal:2.6	CDS	1368850	1369284	.	-	0	ID=GNDLBLIP_01651;Name=ohrR;gene=ohrR;inference=ab initio prediction:Prodigal:2.6,similar to AA sequence:UniProtKB:O34777;locus_tag=GNDLBLIP_01651;product=Organic hydroperoxide resistance transcriptional regulator
33958	Prodigal:2.6	CDS	1369574	1370236	.	+	0	ID=GNDLBLIP_01652;inference=ab initio prediction:Prodigal:2.6;locus_tag=GNDLBLIP_01652;product=hypothetical protein
33958	Prodigal:2.6	CDS	1370264	1371163	.	+	0	ID=GNDLBLIP_01653;inference=ab initio prediction:Prodigal:2.6;locus_tag=GNDLBLIP_01653;product=hypothetical protein
33958	Prodigal:2.6	CDS	1371275	1371898	.	+	0	ID=GNDLBLIP_01654;inference=ab initio prediction:Prodigal:2.6;locus_tag=GNDLBLIP_01654;product=hypothetical protein
33958	Prodigal:2.6	CDS	1371877	1372281	.	+	0	ID=GNDLBLIP_01655;inference=ab initio prediction:Prodigal:2.6;locus_tag=GNDLBLIP_01655;product=hypothetical protein
33958	Prodigal:2.6	CDS	1372313	1373896	.	+	0	ID=GNDLBLIP_01656;Name=nhaK_2;dbxref=COG:COG0025;gene=nhaK_2;inference=ab initio prediction:Prodigal:2.6,similar to AA sequence:UniProtKB:O32212;locus_tag=GNDLBLIP_01656;product=Sodium%2C potassium%2C lithium and rubidium/H(+) antiporter
33958	Prodigal:2.6	CDS	1374027	1375073	.	+	0	ID=GNDLBLIP_01657;dbxref=COG:COG2220;inference=ab initio prediction:Prodigal:2.6,similar to AA sequence:UniProtKB:P9WKP3;locus_tag=GNDLBLIP_01657;product=putative protein
33958	Prodigal:2.6	CDS	1375165	1375608	.	-	0	ID=GNDLBLIP_01658;inference=ab initio prediction:Prodigal:2.6;locus_tag=GNDLBLIP_01658;product=hypothetical protein
33958	Prodigal:2.6	CDS	1375678	1376007	.	-	0	ID=GNDLBLIP_01659;inference=ab initio prediction:Prodigal:2.6;locus_tag=GNDLBLIP_01659;product=hypothetical protein
33958	Prodigal:2.6	CDS	1376500	1377498	.	+	0	ID=GNDLBLIP_01660;inference=ab initio prediction:Prodigal:2.6;locus_tag=GNDLBLIP_01660;product=hypothetical protein
33958	Prodigal:2.6	CDS	1377837	1378367	.	-	0	ID=GNDLBLIP_01661;inference=ab initio prediction:Prodigal:2.6;locus_tag=GNDLBLIP_01661;product=hypothetical protein
33958	Prodigal:2.6	CDS	1378372	1379148	.	-	0	ID=GNDLBLIP_01662;inference=ab initio prediction:Prodigal:2.6;locus_tag=GNDLBLIP_01662;product=hypothetical protein
33958	Prodigal:2.6	CDS	1379199	1379705	.	-	0	ID=GNDLBLIP_01663;inference=ab initio prediction:Prodigal:2.6;locus_tag=GNDLBLIP_01663;product=hypothetical protein
33958	Prodigal:2.6	CDS	1379762	1380346	.	-	0	ID=GNDLBLIP_01664;inference=ab initio prediction:Prodigal:2.6,similar to AA sequence:UniProtKB:A0A086F3E3;locus_tag=GNDLBLIP_01664;product=Potassium channel
33958	Prodigal:2.6	CDS	1380459	1381772	.	-	0	ID=GNDLBLIP_01665;eC_number=3.3.1.1;Name=ahcY;gene=ahcY;inference=ab initio prediction:Prodigal:2.6,similar to AA sequence:UniProtKB:Q7TWW7;locus_tag=GNDLBLIP_01665;product=Adenosylhomocysteinase
33958	Prodigal:2.6	CDS	1381829	1382350	.	+	0	ID=GNDLBLIP_01666;inference=ab initio prediction:Prodigal:2.6;locus_tag=GNDLBLIP_01666;product=hypothetical protein
33958	Prodigal:2.6	CDS	1382534	1383523	.	-	0	ID=GNDLBLIP_01667;Name=yccS_1;dbxref=COG:COG1289;gene=yccS_1;inference=ab initio prediction:Prodigal:2.6,similar to AA sequence:UniProtKB:P75870;locus_tag=GNDLBLIP_01667;product=Inner membrane protein YccS
33958	Prodigal:2.6	CDS	1383646	1384689	.	-	0	ID=GNDLBLIP_01668;Name=yccS_2;dbxref=COG:COG1289;gene=yccS_2;inference=ab initio prediction:Prodigal:2.6,similar to AA sequence:UniProtKB:P75870;locus_tag=GNDLBLIP_01668;product=Inner membrane protein YccS
33958	Prodigal:2.6	CDS	1384766	1385140	.	-	0	ID=GNDLBLIP_01669;Name=yybR_2;dbxref=COG:COG1733;gene=yybR_2;inference=ab initio prediction:Prodigal:2.6,similar to AA sequence:UniProtKB:P37486;locus_tag=GNDLBLIP_01669;product=putative HTH-type transcriptional regulator YybR
33958	Prodigal:2.6	CDS	1385236	1385778	.	+	0	ID=GNDLBLIP_01670;eC_number=1.6.99.-;Name=ywrO_1;dbxref=COG:COG2249;gene=ywrO_1;inference=ab initio prediction:Prodigal:2.6,similar to AA sequence:UniProtKB:P80871;locus_tag=GNDLBLIP_01670;product=General stress protein 14
33958	Prodigal:2.6	CDS	1385846	1386385	.	+	0	ID=GNDLBLIP_01671;eC_number=6.3.2.10;Name=murF_1;dbxref=COG:COG0770;gene=murF_1;inference=ab initio prediction:Prodigal:2.6,similar to AA sequence:UniProtKB:P11880;locus_tag=GNDLBLIP_01671;product=UDP-N-acetylmuramoyl-tripeptide--D-alanyl-D-alanine ligase
33958	Prodigal:2.6	CDS	1386562	1387116	.	+	0	ID=GNDLBLIP_01672;eC_number=6.3.2.10;Name=murF_2;dbxref=COG:COG0770;gene=murF_2;inference=ab initio prediction:Prodigal:2.6,similar to AA sequence:UniProtKB:P11880;locus_tag=GNDLBLIP_01672;product=UDP-N-acetylmuramoyl-tripeptide--D-alanyl-D-alanine ligase
33958	Prodigal:2.6	CDS	1387181	1387786	.	-	0	ID=GNDLBLIP_01673;eC_number=3.6.1.61;Name=ndx1;dbxref=COG:COG0494;gene=ndx1;inference=ab initio prediction:Prodigal:2.6,similar to AA sequence:UniProtKB:Q75UV1;locus_tag=GNDLBLIP_01673;product=Diadenosine hexaphosphate hydrolase
33958	Prodigal:2.6	CDS	1387787	1388212	.	+	0	ID=GNDLBLIP_01674;inference=ab initio prediction:Prodigal:2.6;locus_tag=GNDLBLIP_01674;product=hypothetical protein
33958	Prodigal:2.6	CDS	1388410	1389456	.	-	0	ID=GNDLBLIP_01675;eC_number=2.7.1.170;Name=anmK;dbxref=COG:COG2377;gene=anmK;inference=ab initio prediction:Prodigal:2.6,similar to AA sequence:UniProtKB:Q9I5Q5;locus_tag=GNDLBLIP_01675;product=Anhydro-N-acetylmuramic acid kinase
33958	Prodigal:2.6	CDS	1389457	1390047	.	-	0	ID=GNDLBLIP_01676;Name=lptC;gene=lptC;inference=ab initio prediction:Prodigal:2.6,protein motif:HAMAP:MF_01915;locus_tag=GNDLBLIP_01676;product=Lipopolysaccharide export system protein LptC
33958	Prodigal:2.6	CDS	1390049	1391320	.	-	0	ID=GNDLBLIP_01677;inference=ab initio prediction:Prodigal:2.6;locus_tag=GNDLBLIP_01677;product=hypothetical protein
33958	Prodigal:2.6	CDS	1391538	1392659	.	+	0	ID=GNDLBLIP_01678;eC_number=2.7.7.7;Name=dnaX_1;dbxref=COG:COG2812;gene=dnaX_1;inference=ab initio prediction:Prodigal:2.6,similar to AA sequence:UniProtKB:P9WNT9;locus_tag=GNDLBLIP_01678;product=DNA polymerase III subunit gamma/tau
33958	Prodigal:2.6	CDS	1392851	1393837	.	-	0	ID=GNDLBLIP_01679;Name=corA;dbxref=COG:COG0598;gene=corA;inference=ab initio prediction:Prodigal:2.6,similar to AA sequence:UniProtKB:Q9WZ31;locus_tag=GNDLBLIP_01679;product=Cobalt/magnesium transport protein CorA
33958	Prodigal:2.6	CDS	1393979	1395001	.	+	0	ID=GNDLBLIP_01680;eC_number=2.3.1.180;Name=fabH_2;dbxref=COG:COG0332;gene=fabH_2;inference=ab initio prediction:Prodigal:2.6,similar to AA sequence:UniProtKB:O67185;locus_tag=GNDLBLIP_01680;product=3-oxoacyl-[acyl-carrier-protein] synthase 3
33958	Prodigal:2.6	CDS	1395360	1395791	.	+	0	ID=GNDLBLIP_01681;inference=ab initio prediction:Prodigal:2.6;locus_tag=GNDLBLIP_01681;product=hypothetical protein
33958	Prodigal:2.6	CDS	1395788	1395901	.	+	0	ID=GNDLBLIP_01682;inference=ab initio prediction:Prodigal:2.6;locus_tag=GNDLBLIP_01682;product=hypothetical protein
33958	Prodigal:2.6	CDS	1395991	1397496	.	+	0	ID=GNDLBLIP_01683;inference=ab initio prediction:Prodigal:2.6;locus_tag=GNDLBLIP_01683;product=hypothetical protein
33958	Prodigal:2.6	CDS	1397493	1397624	.	+	0	ID=GNDLBLIP_01684;inference=ab initio prediction:Prodigal:2.6;locus_tag=GNDLBLIP_01684;product=hypothetical protein
33958	Prodigal:2.6	CDS	1397609	1398226	.	+	0	ID=GNDLBLIP_01685;inference=ab initio prediction:Prodigal:2.6;locus_tag=GNDLBLIP_01685;product=hypothetical protein
33958	Prodigal:2.6	CDS	1398303	1399220	.	-	0	ID=GNDLBLIP_01686;Name=cysL_1;dbxref=COG:COG0583;gene=cysL_1;inference=ab initio prediction:Prodigal:2.6,similar to AA sequence:UniProtKB:P39647;locus_tag=GNDLBLIP_01686;product=HTH-type transcriptional regulator CysL
33958	Prodigal:2.6	CDS	1399318	1400298	.	+	0	ID=GNDLBLIP_01687;Name=araJ_2;dbxref=COG:COG2814;gene=araJ_2;inference=ab initio prediction:Prodigal:2.6,similar to AA sequence:UniProtKB:P23910;locus_tag=GNDLBLIP_01687;product=Putative transporter AraJ
33958	Prodigal:2.6	CDS	1400289	1400507	.	+	0	ID=GNDLBLIP_01688;inference=ab initio prediction:Prodigal:2.6;locus_tag=GNDLBLIP_01688;product=hypothetical protein
33958	Prodigal:2.6	CDS	1400593	1401576	.	+	0	ID=GNDLBLIP_01689;eC_number=1.1.1.-;Name=yhdN;dbxref=COG:COG0667;gene=yhdN;inference=ab initio prediction:Prodigal:2.6,similar to AA sequence:UniProtKB:P80874;locus_tag=GNDLBLIP_01689;product=Aldo-keto reductase YhdN
33958	Prodigal:2.6	CDS	1401663	1402271	.	+	0	ID=GNDLBLIP_01690;inference=ab initio prediction:Prodigal:2.6;locus_tag=GNDLBLIP_01690;product=hypothetical protein
33958	Prodigal:2.6	CDS	1402292	1402636	.	+	0	ID=GNDLBLIP_01691;inference=ab initio prediction:Prodigal:2.6;locus_tag=GNDLBLIP_01691;product=hypothetical protein
33958	Prodigal:2.6	CDS	1402702	1403190	.	+	0	ID=GNDLBLIP_01692;eC_number=5.1.3.33;Name=cetB;gene=cetB;inference=ab initio prediction:Prodigal:2.6,similar to AA sequence:UniProtKB:A1YPR3;locus_tag=GNDLBLIP_01692;product=2-epi-5-epi-valiolone epimerase
33958	Prodigal:2.6	CDS	1403256	1403723	.	-	0	ID=GNDLBLIP_01693;inference=ab initio prediction:Prodigal:2.6;locus_tag=GNDLBLIP_01693;product=hypothetical protein
33958	Prodigal:2.6	CDS	1403723	1404268	.	-	0	ID=GNDLBLIP_01694;inference=ab initio prediction:Prodigal:2.6;locus_tag=GNDLBLIP_01694;product=hypothetical protein
33958	Prodigal:2.6	CDS	1404317	1405273	.	-	0	ID=GNDLBLIP_01695;eC_number=3.5.1.100;Name=ramA;gene=ramA;inference=ab initio prediction:Prodigal:2.6,similar to AA sequence:UniProtKB:Q75SP7;locus_tag=GNDLBLIP_01695;product=(R)-stereoselective amidase
33958	Prodigal:2.6	CDS	1405341	1406147	.	-	0	ID=GNDLBLIP_01696;Name=btr_3;dbxref=COG:COG0614;gene=btr_3;inference=ab initio prediction:Prodigal:2.6,similar to AA sequence:UniProtKB:P40408;locus_tag=GNDLBLIP_01696;product=HTH-type transcriptional activator Btr
33958	Prodigal:2.6	CDS	1406203	1407423	.	-	0	ID=GNDLBLIP_01697;inference=ab initio prediction:Prodigal:2.6;locus_tag=GNDLBLIP_01697;product=hypothetical protein
33958	Prodigal:2.6	CDS	1407444	1407623	.	-	0	ID=GNDLBLIP_01698;inference=ab initio prediction:Prodigal:2.6;locus_tag=GNDLBLIP_01698;product=hypothetical protein
33958	Prodigal:2.6	CDS	1407886	1409790	.	+	0	ID=GNDLBLIP_01699;eC_number=2.4.1.18;Name=glgB;dbxref=COG:COG0296;gene=glgB;inference=ab initio prediction:Prodigal:2.6,similar to AA sequence:UniProtKB:P16954;locus_tag=GNDLBLIP_01699;product=1%2C4-alpha-glucan branching enzyme GlgB
33958	Prodigal:2.6	CDS	1409799	1410278	.	+	0	ID=GNDLBLIP_01700;eC_number=2.4.1.21;Name=glgA_1;dbxref=COG:COG0297;gene=glgA_1;inference=ab initio prediction:Prodigal:2.6,similar to AA sequence:UniProtKB:P39125;locus_tag=GNDLBLIP_01700;product=Glycogen synthase
33958	Prodigal:2.6	CDS	1410275	1411219	.	+	0	ID=GNDLBLIP_01701;eC_number=2.4.1.21;Name=glgA_2;dbxref=COG:COG0297;gene=glgA_2;inference=ab initio prediction:Prodigal:2.6,similar to AA sequence:UniProtKB:P39125;locus_tag=GNDLBLIP_01701;product=Glycogen synthase
33958	Prodigal:2.6	CDS	1411268	1412494	.	+	0	ID=GNDLBLIP_01702;eC_number=2.7.7.27;Name=glgC;dbxref=COG:COG0448;gene=glgC;inference=ab initio prediction:Prodigal:2.6,similar to AA sequence:UniProtKB:P0A6V1;locus_tag=GNDLBLIP_01702;product=Glucose-1-phosphate adenylyltransferase
33958	Prodigal:2.6	CDS	1412685	1413233	.	+	0	ID=GNDLBLIP_01703;inference=ab initio prediction:Prodigal:2.6;locus_tag=GNDLBLIP_01703;product=hypothetical protein
33958	Prodigal:2.6	CDS	1413260	1413604	.	+	0	ID=GNDLBLIP_01704;inference=ab initio prediction:Prodigal:2.6;locus_tag=GNDLBLIP_01704;product=hypothetical protein
33958	Prodigal:2.6	CDS	1413717	1416515	.	+	0	ID=GNDLBLIP_01705;eC_number=1.2.4.2;Name=sucA;dbxref=COG:COG0567;gene=sucA;inference=ab initio prediction:Prodigal:2.6,similar to AA sequence:UniProtKB:P0AFG3;locus_tag=GNDLBLIP_01705;product=2-oxoglutarate dehydrogenase E1 component
33958	Prodigal:2.6	CDS	1416582	1417820	.	+	0	ID=GNDLBLIP_01706;eC_number=2.3.1.61;Name=sucB;dbxref=COG:COG0508;gene=sucB;inference=ab initio prediction:Prodigal:2.6,similar to AA sequence:UniProtKB:P0AFG7;locus_tag=GNDLBLIP_01706;product=Dihydrolipoyllysine-residue succinyltransferase component of 2-oxoglutarate dehydrogenase complex
33958	Prodigal:2.6	CDS	1417907	1418293	.	+	0	ID=GNDLBLIP_01707;Name=apaG;dbxref=COG:COG2967;gene=apaG;inference=ab initio prediction:Prodigal:2.6,similar to AA sequence:UniProtKB:Q8PP26;locus_tag=GNDLBLIP_01707;product=Protein ApaG
33958	Prodigal:2.6	CDS	1418353	1418976	.	-	0	ID=GNDLBLIP_01708;Name=yedA_1;gene=yedA_1;inference=ab initio prediction:Prodigal:2.6,similar to AA sequence:UniProtKB:P0AA70;locus_tag=GNDLBLIP_01708;product=putative inner membrane transporter YedA
33958	Prodigal:2.6	CDS	1418967	1419353	.	-	0	ID=GNDLBLIP_01709;inference=ab initio prediction:Prodigal:2.6;locus_tag=GNDLBLIP_01709;product=hypothetical protein
33958	Prodigal:2.6	CDS	1419370	1419831	.	-	0	ID=GNDLBLIP_01710;Name=lrp_3;dbxref=COG:COG1522;gene=lrp_3;inference=ab initio prediction:Prodigal:2.6,similar to AA sequence:UniProtKB:P0ACJ0;locus_tag=GNDLBLIP_01710;product=Leucine-responsive regulatory protein
33958	Prodigal:2.6	CDS	1419956	1420510	.	-	0	ID=GNDLBLIP_01711;eC_number=3.6.4.12;Name=dinG_1;dbxref=COG:COG0847;gene=dinG_1;inference=ab initio prediction:Prodigal:2.6,similar to AA sequence:UniProtKB:Q2FYH5;locus_tag=GNDLBLIP_01711;product=putative ATP-dependent helicase DinG
33958	Prodigal:2.6	CDS	1421014	1421319	.	-	0	ID=GNDLBLIP_01712;inference=ab initio prediction:Prodigal:2.6;locus_tag=GNDLBLIP_01712;product=hypothetical protein
33958	Prodigal:2.6	CDS	1421274	1421597	.	-	0	ID=GNDLBLIP_01713;inference=ab initio prediction:Prodigal:2.6;locus_tag=GNDLBLIP_01713;product=hypothetical protein
33958	Prodigal:2.6	CDS	1421692	1422459	.	-	0	ID=GNDLBLIP_01714;eC_number=2.3.1.241;Name=lpxL;gene=lpxL;inference=ab initio prediction:Prodigal:2.6,protein motif:HAMAP:MF_01942;locus_tag=GNDLBLIP_01714;product=Lipid A biosynthesis lauroyltransferase
33958	Prodigal:2.6	CDS	1422567	1423151	.	+	0	ID=GNDLBLIP_01715;eC_number=1.8.1.8;Name=dsbD_3;gene=dsbD_3;inference=ab initio prediction:Prodigal:2.6,protein motif:HAMAP:MF_00399;locus_tag=GNDLBLIP_01715;product=Thiol:disulfide interchange protein DsbD
33958	Prodigal:2.6	CDS	1423246	1423650	.	+	0	ID=GNDLBLIP_01716;inference=ab initio prediction:Prodigal:2.6;locus_tag=GNDLBLIP_01716;product=hypothetical protein
33958	Prodigal:2.6	CDS	1423736	1424695	.	+	0	ID=GNDLBLIP_01717;eC_number=1.1.5.-;Name=yliI_1;dbxref=COG:COG2133;gene=yliI_1;inference=ab initio prediction:Prodigal:2.6,similar to AA sequence:UniProtKB:P75804;locus_tag=GNDLBLIP_01717;product=Aldose sugar dehydrogenase YliI
33958	Prodigal:2.6	CDS	1424662	1424940	.	+	0	ID=GNDLBLIP_01718;eC_number=1.1.5.-;Name=yliI_2;dbxref=COG:COG2133;gene=yliI_2;inference=ab initio prediction:Prodigal:2.6,similar to AA sequence:UniProtKB:P75804;locus_tag=GNDLBLIP_01718;product=Aldose sugar dehydrogenase YliI
33958	Prodigal:2.6	CDS	1425008	1426435	.	+	0	ID=GNDLBLIP_01719;eC_number=4.3.2.2;Name=purB;dbxref=COG:COG0015;gene=purB;inference=ab initio prediction:Prodigal:2.6,similar to AA sequence:UniProtKB:P12047;locus_tag=GNDLBLIP_01719;product=Adenylosuccinate lyase
33958	Prodigal:2.6	CDS	1426551	1427306	.	+	0	ID=GNDLBLIP_01720;eC_number=6.3.5.3;Name=purL_1;gene=purL_1;inference=ab initio prediction:Prodigal:2.6,protein motif:HAMAP:MF_00419;locus_tag=GNDLBLIP_01720;product=Phosphoribosylformylglycinamidine synthase
33958	Prodigal:2.6	CDS	1427333	1427719	.	+	0	ID=GNDLBLIP_01721;eC_number=6.3.5.3;Name=purL_2;dbxref=COG:COG0046;gene=purL_2;inference=ab initio prediction:Prodigal:2.6,similar to AA sequence:UniProtKB:P74881;locus_tag=GNDLBLIP_01721;product=Phosphoribosylformylglycinamidine synthase
33958	Prodigal:2.6	CDS	1427728	1429398	.	+	0	ID=GNDLBLIP_01722;eC_number=6.3.5.3;Name=purL_3;dbxref=COG:COG0046;gene=purL_3;inference=ab initio prediction:Prodigal:2.6,similar to AA sequence:UniProtKB:Q5SMH8;locus_tag=GNDLBLIP_01722;product=Phosphoribosylformylglycinamidine synthase subunit PurL
33958	Prodigal:2.6	CDS	1429455	1430246	.	+	0	ID=GNDLBLIP_01723;eC_number=6.3.5.3;Name=purQ;dbxref=COG:COG0047;gene=purQ;inference=ab initio prediction:Prodigal:2.6,similar to AA sequence:UniProtKB:P12041;locus_tag=GNDLBLIP_01723;product=Phosphoribosylformylglycinamidine synthase subunit PurQ
33958	Prodigal:2.6	CDS	1430325	1431299	.	+	0	ID=GNDLBLIP_01724;inference=ab initio prediction:Prodigal:2.6;locus_tag=GNDLBLIP_01724;product=hypothetical protein
33958	Prodigal:2.6	CDS	1431370	1432092	.	+	0	ID=GNDLBLIP_01725;eC_number=6.3.2.6;Name=purC;dbxref=COG:COG0152;gene=purC;inference=ab initio prediction:Prodigal:2.6,similar to AA sequence:UniProtKB:Q0TTB4;locus_tag=GNDLBLIP_01725;product=Phosphoribosylaminoimidazole-succinocarboxamide synthase
33958	Prodigal:2.6	CDS	1432132	1432284	.	+	0	ID=GNDLBLIP_01726;inference=ab initio prediction:Prodigal:2.6;locus_tag=GNDLBLIP_01726;product=hypothetical protein
33958	Prodigal:2.6	CDS	1432224	1433627	.	+	0	ID=GNDLBLIP_01727;eC_number=2.4.2.14;Name=purF;dbxref=COG:COG0034;gene=purF;inference=ab initio prediction:Prodigal:2.6,similar to AA sequence:UniProtKB:P00497;locus_tag=GNDLBLIP_01727;product=Amidophosphoribosyltransferase
33958	Prodigal:2.6	CDS	1433926	1434450	.	+	0	ID=GNDLBLIP_01728;Name=susC_7;gene=susC_7;inference=ab initio prediction:Prodigal:2.6,similar to AA sequence:UniProtKB:Q8A1G1;locus_tag=GNDLBLIP_01728;product=TonB-dependent receptor SusC
33958	Prodigal:2.6	CDS	1434489	1435229	.	+	0	ID=GNDLBLIP_01729;Name=susC_8;gene=susC_8;inference=ab initio prediction:Prodigal:2.6,similar to AA sequence:UniProtKB:Q8A1G1;locus_tag=GNDLBLIP_01729;product=TonB-dependent receptor SusC
33958	Prodigal:2.6	CDS	1435304	1436689	.	+	0	ID=GNDLBLIP_01730;Name=susC_9;gene=susC_9;inference=ab initio prediction:Prodigal:2.6,similar to AA sequence:UniProtKB:Q8A1G1;locus_tag=GNDLBLIP_01730;product=TonB-dependent receptor SusC
33958	Prodigal:2.6	CDS	1436700	1438301	.	+	0	ID=GNDLBLIP_01731;Name=susD_1;gene=susD_1;inference=ab initio prediction:Prodigal:2.6,similar to AA sequence:UniProtKB:Q8A1G2;locus_tag=GNDLBLIP_01731;product=Starch-binding protein SusD
33958	Prodigal:2.6	CDS	1438318	1439331	.	+	0	ID=GNDLBLIP_01732;inference=ab initio prediction:Prodigal:2.6;locus_tag=GNDLBLIP_01732;product=hypothetical protein
33958	Prodigal:2.6	CDS	1439418	1440566	.	+	0	ID=GNDLBLIP_01733;eC_number=3.2.1.-;Name=ygjK_1;gene=ygjK_1;inference=ab initio prediction:Prodigal:2.6,similar to AA sequence:UniProtKB:P42592;locus_tag=GNDLBLIP_01733;product=Glucosidase YgjK
33958	Prodigal:2.6	CDS	1440509	1441219	.	+	0	ID=GNDLBLIP_01734;eC_number=3.2.1.-;Name=ygjK_2;gene=ygjK_2;inference=ab initio prediction:Prodigal:2.6,similar to AA sequence:UniProtKB:P42592;locus_tag=GNDLBLIP_01734;product=Glucosidase YgjK
33958	Prodigal:2.6	CDS	1441231	1441362	.	+	0	ID=GNDLBLIP_01735;eC_number=3.2.1.-;Name=ygjK_3;gene=ygjK_3;inference=ab initio prediction:Prodigal:2.6,similar to AA sequence:UniProtKB:P42592;locus_tag=GNDLBLIP_01735;product=Glucosidase YgjK
33958	Prodigal:2.6	CDS	1441421	1442128	.	+	0	ID=GNDLBLIP_01736;eC_number=3.2.1.3;Name=susB_1;gene=susB_1;inference=ab initio prediction:Prodigal:2.6,similar to AA sequence:UniProtKB:G8JZS4;locus_tag=GNDLBLIP_01736;product=Glucan 1%2C4-alpha-glucosidase SusB
33958	Prodigal:2.6	CDS	1442317	1443582	.	+	0	ID=GNDLBLIP_01737;eC_number=3.2.1.3;Name=susB_2;gene=susB_2;inference=ab initio prediction:Prodigal:2.6,similar to AA sequence:UniProtKB:G8JZS4;locus_tag=GNDLBLIP_01737;product=Glucan 1%2C4-alpha-glucosidase SusB
33958	Prodigal:2.6	CDS	1443833	1444549	.	-	0	ID=GNDLBLIP_01738;inference=ab initio prediction:Prodigal:2.6;locus_tag=GNDLBLIP_01738;product=hypothetical protein
33958	Prodigal:2.6	CDS	1444772	1445500	.	+	0	ID=GNDLBLIP_01739;eC_number=1.13.11.24;Name=yhhW_4;dbxref=COG:COG1741;gene=yhhW_4;inference=ab initio prediction:Prodigal:2.6,similar to AA sequence:UniProtKB:P46852;locus_tag=GNDLBLIP_01739;product=Quercetin 2%2C3-dioxygenase
33958	Prodigal:2.6	CDS	1445608	1446159	.	+	0	ID=GNDLBLIP_01740;eC_number=1.7.1.6;Name=azr;gene=azr;inference=ab initio prediction:Prodigal:2.6,similar to AA sequence:UniProtKB:Q9FAW5;locus_tag=GNDLBLIP_01740;product=NADPH azoreductase
33958	Prodigal:2.6	CDS	1446434	1447267	.	+	0	ID=GNDLBLIP_01741;eC_number=6.3.3.1;Name=purM_1;dbxref=COG:COG0150;gene=purM_1;inference=ab initio prediction:Prodigal:2.6,similar to AA sequence:UniProtKB:Q9KPY6;locus_tag=GNDLBLIP_01741;product=Phosphoribosylformylglycinamidine cyclo-ligase
33958	Prodigal:2.6	CDS	1447279	1447419	.	+	0	ID=GNDLBLIP_01742;eC_number=6.3.3.1;Name=purM_2;gene=purM_2;inference=ab initio prediction:Prodigal:2.6,protein motif:HAMAP:MF_00741;locus_tag=GNDLBLIP_01742;product=Phosphoribosylformylglycinamidine cyclo-ligase
33958	Prodigal:2.6	CDS	1447498	1448061	.	+	0	ID=GNDLBLIP_01743;eC_number=2.1.2.2;Name=purN_1;dbxref=COG:COG0299;gene=purN_1;inference=ab initio prediction:Prodigal:2.6,similar to AA sequence:UniProtKB:P08179;locus_tag=GNDLBLIP_01743;product=Phosphoribosylglycinamide formyltransferase
33958	Prodigal:2.6	CDS	1448072	1448959	.	+	0	ID=GNDLBLIP_01744;inference=ab initio prediction:Prodigal:2.6;locus_tag=GNDLBLIP_01744;product=hypothetical protein
33958	Prodigal:2.6	CDS	1449160	1449774	.	+	0	ID=GNDLBLIP_01745;Name=purH_1;dbxref=COG:COG0138;gene=purH_1;inference=ab initio prediction:Prodigal:2.6,similar to AA sequence:UniProtKB:P15639;locus_tag=GNDLBLIP_01745;product=Bifunctional purine biosynthesis protein PurH
33958	Prodigal:2.6	CDS	1449846	1450673	.	+	0	ID=GNDLBLIP_01746;Name=purH_2;gene=purH_2;inference=ab initio prediction:Prodigal:2.6,similar to AA sequence:UniProtKB:P67544;locus_tag=GNDLBLIP_01746;product=Bifunctional purine biosynthesis protein PurH
33958	Prodigal:2.6	CDS	1450797	1452044	.	+	0	ID=GNDLBLIP_01747;eC_number=6.3.4.13;Name=purD;dbxref=COG:COG0151;gene=purD;inference=ab initio prediction:Prodigal:2.6,similar to AA sequence:UniProtKB:O66949;locus_tag=GNDLBLIP_01747;product=Phosphoribosylamine--glycine ligase
33958	Prodigal:2.6	CDS	1452172	1453701	.	+	0	ID=GNDLBLIP_01748;eC_number=6.3.5.2;Name=guaA;dbxref=COG:COG0518;gene=guaA;inference=ab initio prediction:Prodigal:2.6,similar to AA sequence:UniProtKB:P04079;locus_tag=GNDLBLIP_01748;product=GMP synthase [glutamine-hydrolyzing]
33958	Prodigal:2.6	CDS	1453721	1455151	.	-	0	ID=GNDLBLIP_01749;inference=ab initio prediction:Prodigal:2.6,similar to AA sequence:UniProtKB:P9WJX3;locus_tag=GNDLBLIP_01749;product=putative multidrug-efflux transporter
33958	Prodigal:2.6	CDS	1455236	1456045	.	-	0	ID=GNDLBLIP_01750;Name=rhaS_6;gene=rhaS_6;inference=ab initio prediction:Prodigal:2.6,similar to AA sequence:UniProtKB:P09377;locus_tag=GNDLBLIP_01750;product=HTH-type transcriptional activator RhaS
33958	Prodigal:2.6	CDS	1456200	1457846	.	+	0	ID=GNDLBLIP_01751;eC_number=2.7.-.-;Name=ubiB;dbxref=COG:COG0661;gene=ubiB;inference=ab initio prediction:Prodigal:2.6,similar to AA sequence:UniProtKB:O07443;locus_tag=GNDLBLIP_01751;product=putative protein kinase UbiB
33958	Prodigal:2.6	CDS	1458006	1460147	.	+	0	ID=GNDLBLIP_01752;Name=iutA_1;gene=iutA_1;inference=ab initio prediction:Prodigal:2.6,similar to AA sequence:UniProtKB:Q6U607;locus_tag=GNDLBLIP_01752;product=Ferric aerobactin receptor
33958	Prodigal:2.6	CDS	1460169	1461656	.	+	0	ID=GNDLBLIP_01753;eC_number=3.6.4.13;Name=rhlE_2;dbxref=COG:COG0513;gene=rhlE_2;inference=ab initio prediction:Prodigal:2.6,similar to AA sequence:UniProtKB:P25888;locus_tag=GNDLBLIP_01753;product=ATP-dependent RNA helicase RhlE
33958	Prodigal:2.6	CDS	1461696	1462502	.	-	0	ID=GNDLBLIP_01754;dbxref=COG:COG1752;inference=ab initio prediction:Prodigal:2.6,similar to AA sequence:UniProtKB:P9WIY9;locus_tag=GNDLBLIP_01754;product=putative NTE family protein
33958	Prodigal:2.6	CDS	1462544	1463392	.	-	0	ID=GNDLBLIP_01755;inference=ab initio prediction:Prodigal:2.6;locus_tag=GNDLBLIP_01755;product=hypothetical protein
33958	Prodigal:2.6	CDS	1463446	1464105	.	-	0	ID=GNDLBLIP_01756;inference=ab initio prediction:Prodigal:2.6;locus_tag=GNDLBLIP_01756;product=hypothetical protein
33958	Prodigal:2.6	CDS	1464111	1465274	.	-	0	ID=GNDLBLIP_01757;eC_number=1.1.1.-;Name=yqhD;dbxref=COG:COG1979;gene=yqhD;inference=ab initio prediction:Prodigal:2.6,similar to AA sequence:UniProtKB:Q46856;locus_tag=GNDLBLIP_01757;product=Alcohol dehydrogenase YqhD
33958	Prodigal:2.6	CDS	1465455	1465892	.	-	0	ID=GNDLBLIP_01758;inference=ab initio prediction:Prodigal:2.6;locus_tag=GNDLBLIP_01758;product=hypothetical protein
33958	Prodigal:2.6	CDS	1465997	1466530	.	-	0	ID=GNDLBLIP_01759;inference=ab initio prediction:Prodigal:2.6;locus_tag=GNDLBLIP_01759;product=hypothetical protein
33958	Prodigal:2.6	CDS	1466975	1467862	.	+	0	ID=GNDLBLIP_01760;eC_number=4.1.1.31;Name=ppc_1;dbxref=COG:COG2352;gene=ppc_1;inference=ab initio prediction:Prodigal:2.6,similar to AA sequence:UniProtKB:Q9RNU9;locus_tag=GNDLBLIP_01760;product=Phosphoenolpyruvate carboxylase
33958	Prodigal:2.6	CDS	1467892	1469436	.	+	0	ID=GNDLBLIP_01761;eC_number=4.1.1.31;Name=ppc_2;dbxref=COG:COG2352;gene=ppc_2;inference=ab initio prediction:Prodigal:2.6,similar to AA sequence:UniProtKB:P12880;locus_tag=GNDLBLIP_01761;product=Phosphoenolpyruvate carboxylase
33958	Prodigal:2.6	CDS	1469699	1470523	.	+	0	ID=GNDLBLIP_01762;inference=ab initio prediction:Prodigal:2.6;locus_tag=GNDLBLIP_01762;product=hypothetical protein
33958	Prodigal:2.6	CDS	1470618	1470737	.	-	0	ID=GNDLBLIP_01763;inference=ab initio prediction:Prodigal:2.6;locus_tag=GNDLBLIP_01763;product=hypothetical protein
33958	Prodigal:2.6	CDS	1470910	1471308	.	-	0	ID=GNDLBLIP_01764;inference=ab initio prediction:Prodigal:2.6;locus_tag=GNDLBLIP_01764;product=hypothetical protein
33958	Prodigal:2.6	CDS	1471332	1473416	.	-	0	ID=GNDLBLIP_01765;inference=ab initio prediction:Prodigal:2.6;locus_tag=GNDLBLIP_01765;product=hypothetical protein
33958	Prodigal:2.6	CDS	1473806	1474915	.	+	0	ID=GNDLBLIP_01766;eC_number=2.6.1.98;Name=wbpE;dbxref=COG:COG0399;gene=wbpE;inference=ab initio prediction:Prodigal:2.6,similar to AA sequence:UniProtKB:Q9HZ76;locus_tag=GNDLBLIP_01766;product=UDP-2-acetamido-2-deoxy-3-oxo-D-glucuronate aminotransferase
33958	Prodigal:2.6	CDS	1474933	1475679	.	+	0	ID=GNDLBLIP_01767;eC_number=5.1.3.2;Name=galE;dbxref=COG:COG1087;gene=galE;inference=ab initio prediction:Prodigal:2.6,similar to AA sequence:UniProtKB:P09147;locus_tag=GNDLBLIP_01767;product=UDP-glucose 4-epimerase
33958	Prodigal:2.6	CDS	1475745	1475948	.	+	0	ID=GNDLBLIP_01768;eC_number=5.1.3.2;Name=lnpD;gene=lnpD;inference=ab initio prediction:Prodigal:2.6,similar to AA sequence:UniProtKB:E8MF10;locus_tag=GNDLBLIP_01768;product=UDP-glucose 4-epimerase
33958	Prodigal:2.6	CDS	1476109	1476345	.	+	0	ID=GNDLBLIP_01769;inference=ab initio prediction:Prodigal:2.6;locus_tag=GNDLBLIP_01769;product=hypothetical protein
33958	Prodigal:2.6	CDS	1476296	1477111	.	+	0	ID=GNDLBLIP_01770;eC_number=1.1.1.-;Name=acoA;dbxref=COG:COG1071;gene=acoA;inference=ab initio prediction:Prodigal:2.6,similar to AA sequence:UniProtKB:O31404;locus_tag=GNDLBLIP_01770;product=Acetoin:2%2C6-dichlorophenolindophenol oxidoreductase subunit alpha
33958	Prodigal:2.6	CDS	1477193	1478776	.	+	0	ID=GNDLBLIP_01771;eC_number=2.3.1.12;Name=pdhC_1;gene=pdhC_1;inference=ab initio prediction:Prodigal:2.6,similar to AA sequence:UniProtKB:P65636;locus_tag=GNDLBLIP_01771;product=Dihydrolipoyllysine-residue acetyltransferase component of pyruvate dehydrogenase complex
33958	Prodigal:2.6	CDS	1478930	1481293	.	+	0	ID=GNDLBLIP_01772;eC_number=3.2.1.177;dbxref=COG:COG1501;inference=ab initio prediction:Prodigal:2.6,similar to AA sequence:UniProtKB:A7LXT0;locus_tag=GNDLBLIP_01772;product=Alpha-xylosidase BoGH31A
33958	Prodigal:2.6	CDS	1481629	1482792	.	+	0	ID=GNDLBLIP_01773;eC_number=3.2.1.169;Name=nagJ;gene=nagJ;inference=ab initio prediction:Prodigal:2.6,similar to AA sequence:UniProtKB:Q8XL08;locus_tag=GNDLBLIP_01773;product=O-GlcNAcase NagJ
33958	Prodigal:2.6	CDS	1483061	1483738	.	+	0	ID=GNDLBLIP_01774;eC_number=3.6.3.-;Name=lolD;dbxref=COG:COG1136;gene=lolD;inference=ab initio prediction:Prodigal:2.6,similar to AA sequence:UniProtKB:O66646;locus_tag=GNDLBLIP_01774;product=Lipoprotein-releasing system ATP-binding protein LolD
33958	Prodigal:2.6	CDS	1483741	1484334	.	+	0	ID=GNDLBLIP_01775;inference=ab initio prediction:Prodigal:2.6;locus_tag=GNDLBLIP_01775;product=hypothetical protein
33958	Prodigal:2.6	CDS	1484339	1484866	.	+	0	ID=GNDLBLIP_01776;inference=ab initio prediction:Prodigal:2.6;locus_tag=GNDLBLIP_01776;product=hypothetical protein
33958	Prodigal:2.6	CDS	1484900	1485739	.	+	0	ID=GNDLBLIP_01777;Name=rhaS_7;gene=rhaS_7;inference=ab initio prediction:Prodigal:2.6,protein motif:HAMAP:MF_01534;locus_tag=GNDLBLIP_01777;product=HTH-type transcriptional activator RhaS
33958	Prodigal:2.6	CDS	1485809	1486834	.	+	0	ID=GNDLBLIP_01778;inference=ab initio prediction:Prodigal:2.6;locus_tag=GNDLBLIP_01778;product=hypothetical protein
33958	Prodigal:2.6	CDS	1486828	1487235	.	+	0	ID=GNDLBLIP_01779;inference=ab initio prediction:Prodigal:2.6;locus_tag=GNDLBLIP_01779;product=hypothetical protein
33958	Prodigal:2.6	CDS	1487349	1488026	.	+	0	ID=GNDLBLIP_01780;inference=ab initio prediction:Prodigal:2.6,similar to AA sequence:UniProtKB:Q8KES1;locus_tag=GNDLBLIP_01780;note=UPF0758 protein CT0611;product=hypothetical protein
33958	Prodigal:2.6	CDS	1488117	1489859	.	+	0	ID=GNDLBLIP_01781;eC_number=3.5.4.2;Name=ade_1;gene=ade_1;inference=ab initio prediction:Prodigal:2.6,protein motif:HAMAP:MF_01518;locus_tag=GNDLBLIP_01781;product=Adenine deaminase
33958	Prodigal:2.6	CDS	1490016	1490627	.	+	0	ID=GNDLBLIP_01782;eC_number=3.6.1.1;Name=ppa;gene=ppa;inference=ab initio prediction:Prodigal:2.6,similar to AA sequence:UniProtKB:O05724;locus_tag=GNDLBLIP_01782;product=Inorganic pyrophosphatase
33958	Prodigal:2.6	CDS	1490780	1491859	.	+	0	ID=GNDLBLIP_01783;eC_number=2.7.7.7;Name=dnaX_2;dbxref=COG:COG2812;gene=dnaX_2;inference=ab initio prediction:Prodigal:2.6,similar to AA sequence:UniProtKB:P9WNT9;locus_tag=GNDLBLIP_01783;product=DNA polymerase III subunit gamma/tau
33958	Prodigal:2.6	CDS	1491837	1492460	.	+	0	ID=GNDLBLIP_01784;inference=ab initio prediction:Prodigal:2.6;locus_tag=GNDLBLIP_01784;product=hypothetical protein
33958	Prodigal:2.6	CDS	1492476	1493555	.	+	0	ID=GNDLBLIP_01785;Name=aroA_1;dbxref=COG:COG1605;gene=aroA_1;inference=ab initio prediction:Prodigal:2.6,similar to AA sequence:UniProtKB:P39912;locus_tag=GNDLBLIP_01785;product=Protein AroA(G)
33958	Prodigal:2.6	CDS	1493565	1494053	.	+	0	ID=GNDLBLIP_01786;eC_number=3.6.1.-;Name=rsgA_1;dbxref=COG:COG1162;gene=rsgA_1;inference=ab initio prediction:Prodigal:2.6,similar to AA sequence:UniProtKB:O34530;locus_tag=GNDLBLIP_01786;product=Small ribosomal subunit biogenesis GTPase RsgA
33958	Prodigal:2.6	CDS	1494056	1494376	.	+	0	ID=GNDLBLIP_01787;eC_number=3.6.1.-;Name=rsgA_2;dbxref=COG:COG1162;gene=rsgA_2;inference=ab initio prediction:Prodigal:2.6,similar to AA sequence:UniProtKB:Q9X242;locus_tag=GNDLBLIP_01787;product=Small ribosomal subunit biogenesis GTPase RsgA
33958	Prodigal:2.6	CDS	1494495	1495130	.	-	0	ID=GNDLBLIP_01788;Name=albC;gene=albC;inference=ab initio prediction:Prodigal:2.6,similar to AA sequence:UniProtKB:P71009;locus_tag=GNDLBLIP_01788;product=Putative ABC transporter ATP-binding protein AlbC
33958	Prodigal:2.6	CDS	1495117	1496028	.	-	0	ID=GNDLBLIP_01789;inference=ab initio prediction:Prodigal:2.6;locus_tag=GNDLBLIP_01789;product=hypothetical protein
33958	Prodigal:2.6	CDS	1496353	1497285	.	+	0	ID=GNDLBLIP_01790;inference=ab initio prediction:Prodigal:2.6;locus_tag=GNDLBLIP_01790;product=hypothetical protein
33958	Prodigal:2.6	CDS	1497313	1498209	.	+	0	ID=GNDLBLIP_01791;inference=ab initio prediction:Prodigal:2.6;locus_tag=GNDLBLIP_01791;product=hypothetical protein
33958	Prodigal:2.6	CDS	1498252	1499238	.	+	0	ID=GNDLBLIP_01792;eC_number=5.4.99.22;Name=rluB;dbxref=COG:COG1187;gene=rluB;inference=ab initio prediction:Prodigal:2.6,similar to AA sequence:UniProtKB:P35159;locus_tag=GNDLBLIP_01792;product=Ribosomal large subunit pseudouridine synthase B
33958	Prodigal:2.6	CDS	1499356	1500528	.	+	0	ID=GNDLBLIP_01793;inference=ab initio prediction:Prodigal:2.6;locus_tag=GNDLBLIP_01793;product=hypothetical protein
33958	Prodigal:2.6	CDS	1500693	1501301	.	-	0	ID=GNDLBLIP_01794;inference=ab initio prediction:Prodigal:2.6;locus_tag=GNDLBLIP_01794;product=hypothetical protein
33958	Prodigal:2.6	CDS	1501356	1501961	.	-	0	ID=GNDLBLIP_01795;eC_number=3.5.1.19;Name=pncA;dbxref=COG:COG1335;gene=pncA;inference=ab initio prediction:Prodigal:2.6,similar to AA sequence:UniProtKB:P21369;locus_tag=GNDLBLIP_01795;product=Nicotinamidase
33958	Prodigal:2.6	CDS	1502015	1502539	.	+	0	ID=GNDLBLIP_01796;eC_number=3.-.-.-;Name=yfiT;gene=yfiT;inference=ab initio prediction:Prodigal:2.6,similar to AA sequence:UniProtKB:O31562;locus_tag=GNDLBLIP_01796;product=Putative metal-dependent hydrolase YfiT
33958	Prodigal:2.6	CDS	1502541	1502912	.	+	0	ID=GNDLBLIP_01797;inference=ab initio prediction:Prodigal:2.6;locus_tag=GNDLBLIP_01797;product=hypothetical protein
33958	Prodigal:2.6	CDS	1502917	1503513	.	+	0	ID=GNDLBLIP_01798;Name=fnr_2;dbxref=COG:COG0664;gene=fnr_2;inference=ab initio prediction:Prodigal:2.6,similar to AA sequence:UniProtKB:P0A9E5;locus_tag=GNDLBLIP_01798;product=Fumarate and nitrate reduction regulatory protein
33958	Prodigal:2.6	CDS	1503548	1504033	.	+	0	ID=GNDLBLIP_01799;eC_number=3.5.1.88;Name=def2;dbxref=COG:COG0242;gene=def2;inference=ab initio prediction:Prodigal:2.6,similar to AA sequence:UniProtKB:Q9KN16;locus_tag=GNDLBLIP_01799;product=Peptide deformylase 2
33958	Prodigal:2.6	CDS	1504186	1504467	.	+	0	ID=GNDLBLIP_01800;Name=yjdJ_2;dbxref=COG:COG2388;gene=yjdJ_2;inference=ab initio prediction:Prodigal:2.6,similar to AA sequence:UniProtKB:P39274;locus_tag=GNDLBLIP_01800;product=putative protein YjdJ
33958	Prodigal:2.6	CDS	1504473	1504676	.	+	0	ID=GNDLBLIP_01801;inference=ab initio prediction:Prodigal:2.6;locus_tag=GNDLBLIP_01801;product=hypothetical protein
33958	Prodigal:2.6	CDS	1504643	1505329	.	+	0	ID=GNDLBLIP_01802;inference=ab initio prediction:Prodigal:2.6;locus_tag=GNDLBLIP_01802;product=hypothetical protein
33958	Prodigal:2.6	CDS	1505342	1505998	.	-	0	ID=GNDLBLIP_01803;eC_number=2.8.3.5;Name=scoB;dbxref=COG:COG2057;gene=scoB;inference=ab initio prediction:Prodigal:2.6,similar to AA sequence:UniProtKB:P9WPW3;locus_tag=GNDLBLIP_01803;product=putative succinyl-CoA:3-ketoacid coenzyme A transferase subunit B
33958	Prodigal:2.6	CDS	1506071	1506550	.	-	0	ID=GNDLBLIP_01804;eC_number=2.8.3.5;Name=scoA_1;dbxref=COG:COG1788;gene=scoA_1;inference=ab initio prediction:Prodigal:2.6,similar to AA sequence:UniProtKB:P42315;locus_tag=GNDLBLIP_01804;product=putative succinyl-CoA:3-ketoacid coenzyme A transferase subunit A
33958	Prodigal:2.6	CDS	1506547	1506768	.	-	0	ID=GNDLBLIP_01805;eC_number=2.8.3.5;Name=scoA_2;dbxref=COG:COG1788;gene=scoA_2;inference=ab initio prediction:Prodigal:2.6,similar to AA sequence:UniProtKB:P56006;locus_tag=GNDLBLIP_01805;product=Succinyl-CoA:3-ketoacid coenzyme A transferase subunit A
33958	Prodigal:2.6	CDS	1506925	1507395	.	-	0	ID=GNDLBLIP_01806;eC_number=3.4.11.-;Name=ysdC;dbxref=COG:COG1363;gene=ysdC;inference=ab initio prediction:Prodigal:2.6,similar to AA sequence:UniProtKB:P94521;locus_tag=GNDLBLIP_01806;product=Putative aminopeptidase YsdC
33958	Prodigal:2.6	CDS	1507422	1507865	.	-	0	ID=GNDLBLIP_01807;inference=ab initio prediction:Prodigal:2.6;locus_tag=GNDLBLIP_01807;product=hypothetical protein
33958	Prodigal:2.6	CDS	1507910	1508632	.	+	0	ID=GNDLBLIP_01808;inference=ab initio prediction:Prodigal:2.6;locus_tag=GNDLBLIP_01808;product=hypothetical protein
33958	Prodigal:2.6	CDS	1508707	1509498	.	+	0	ID=GNDLBLIP_01809;inference=ab initio prediction:Prodigal:2.6;locus_tag=GNDLBLIP_01809;product=hypothetical protein
33958	Prodigal:2.6	CDS	1509587	1509910	.	-	0	ID=GNDLBLIP_01810;inference=ab initio prediction:Prodigal:2.6;locus_tag=GNDLBLIP_01810;product=hypothetical protein
33958	Prodigal:2.6	CDS	1509898	1510131	.	-	0	ID=GNDLBLIP_01811;Name=mnmC_1;dbxref=COG:COG0665;gene=mnmC_1;inference=ab initio prediction:Prodigal:2.6,similar to AA sequence:UniProtKB:Q8ZD36;locus_tag=GNDLBLIP_01811;product=tRNA 5-methylaminomethyl-2-thiouridine biosynthesis bifunctional protein MnmC
33958	Prodigal:2.6	CDS	1510119	1510571	.	-	0	ID=GNDLBLIP_01812;eC_number=1.5.-.-;Name=mnmC_2;gene=mnmC_2;inference=ab initio prediction:Prodigal:2.6,protein motif:HAMAP:MF_01102;locus_tag=GNDLBLIP_01812;product=tRNA 5-methylaminomethyl-2-thiouridine biosynthesis bifunctional protein MnmC
33958	Prodigal:2.6	CDS	1510656	1511729	.	+	0	ID=GNDLBLIP_01813;eC_number=2.6.1.42;Name=ilvE_3;gene=ilvE_3;inference=ab initio prediction:Prodigal:2.6,similar to AA sequence:UniProtKB:P99138;locus_tag=GNDLBLIP_01813;product=putative branched-chain-amino-acid aminotransferase
33958	Prodigal:2.6	CDS	1511803	1512225	.	-	0	ID=GNDLBLIP_01814;inference=ab initio prediction:Prodigal:2.6;locus_tag=GNDLBLIP_01814;product=hypothetical protein
33958	Prodigal:2.6	CDS	1512507	1513532	.	+	0	ID=GNDLBLIP_01815;inference=ab initio prediction:Prodigal:2.6;locus_tag=GNDLBLIP_01815;product=hypothetical protein
33958	Prodigal:2.6	CDS	1513734	1514405	.	+	0	ID=GNDLBLIP_01816;inference=ab initio prediction:Prodigal:2.6;locus_tag=GNDLBLIP_01816;product=hypothetical protein
33958	Prodigal:2.6	CDS	1514540	1515268	.	-	0	ID=GNDLBLIP_01817;eC_number=2.1.1.297;Name=prmC_2;dbxref=COG:COG2890;gene=prmC_2;inference=ab initio prediction:Prodigal:2.6,similar to AA sequence:UniProtKB:P0ACC1;locus_tag=GNDLBLIP_01817;product=Release factor glutamine methyltransferase
33958	Prodigal:2.6	CDS	1515272	1516030	.	-	0	ID=GNDLBLIP_01818;inference=ab initio prediction:Prodigal:2.6,similar to AA sequence:UniProtKB:P0A8I3;locus_tag=GNDLBLIP_01818;note=UPF0246 protein YaaA;product=hypothetical protein
33958	Prodigal:2.6	CDS	1516039	1516656	.	-	0	ID=GNDLBLIP_01819;Name=yciO;dbxref=COG:COG0009;gene=yciO;inference=ab initio prediction:Prodigal:2.6,similar to AA sequence:UniProtKB:P0AFR4;locus_tag=GNDLBLIP_01819;product=putative protein YciO
33958	Prodigal:2.6	CDS	1516806	1519679	.	+	0	ID=GNDLBLIP_01820;eC_number=3.4.14.5;Name=dap4_1;gene=dap4_1;inference=ab initio prediction:Prodigal:2.6,similar to AA sequence:UniProtKB:Q6F3I7;locus_tag=GNDLBLIP_01820;product=Dipeptidyl aminopeptidase 4
33958	Aragorn:1.2	tRNA	1520963	1521036	.	-	.	ID=GNDLBLIP_01821;inference=COORDINATES:profile:Aragorn:1.2;locus_tag=GNDLBLIP_01821;product=tRNA-Met(cat)
33958	Prodigal:2.6	CDS	1521094	1521561	.	-	0	ID=GNDLBLIP_01822;eC_number=3.1.2.-;dbxref=COG:COG1607;inference=ab initio prediction:Prodigal:2.6,similar to AA sequence:UniProtKB:P44886;locus_tag=GNDLBLIP_01822;product=putative acyl-CoA thioester hydrolase
33958	Prodigal:2.6	CDS	1521698	1522054	.	+	0	ID=GNDLBLIP_01823;inference=ab initio prediction:Prodigal:2.6;locus_tag=GNDLBLIP_01823;product=hypothetical protein
33958	Prodigal:2.6	CDS	1522005	1522700	.	+	0	ID=GNDLBLIP_01824;inference=ab initio prediction:Prodigal:2.6;locus_tag=GNDLBLIP_01824;product=hypothetical protein
33958	Prodigal:2.6	CDS	1522779	1523129	.	+	0	ID=GNDLBLIP_01825;Name=spxA;dbxref=COG:COG1393;gene=spxA;inference=ab initio prediction:Prodigal:2.6,similar to AA sequence:UniProtKB:Q8DU17;locus_tag=GNDLBLIP_01825;product=Regulatory protein Spx
33958	Prodigal:2.6	CDS	1523226	1524977	.	-	0	ID=GNDLBLIP_01826;inference=ab initio prediction:Prodigal:2.6;locus_tag=GNDLBLIP_01826;product=hypothetical protein
33958	Prodigal:2.6	CDS	1524967	1525731	.	-	0	ID=GNDLBLIP_01827;inference=ab initio prediction:Prodigal:2.6;locus_tag=GNDLBLIP_01827;product=hypothetical protein
33958	Prodigal:2.6	CDS	1525906	1527810	.	+	0	ID=GNDLBLIP_01828;eC_number=2.7.13.3;Name=degS_1;gene=degS_1;inference=ab initio prediction:Prodigal:2.6,similar to AA sequence:UniProtKB:P13799;locus_tag=GNDLBLIP_01828;product=Signal transduction histidine-protein kinase/phosphatase DegS
33958	Prodigal:2.6	CDS	1527875	1528447	.	+	0	ID=GNDLBLIP_01829;Name=degU_1;dbxref=COG:COG2197;gene=degU_1;inference=ab initio prediction:Prodigal:2.6,similar to AA sequence:UniProtKB:P13800;locus_tag=GNDLBLIP_01829;product=Transcriptional regulatory protein DegU
33958	Prodigal:2.6	CDS	1528521	1529597	.	-	0	ID=GNDLBLIP_01830;eC_number=2.1.2.10;Name=gcvT;dbxref=COG:COG0404;gene=gcvT;inference=ab initio prediction:Prodigal:2.6,similar to AA sequence:UniProtKB:Q9WY54;locus_tag=GNDLBLIP_01830;product=Aminomethyltransferase
33958	Prodigal:2.6	CDS	1529640	1530149	.	-	0	ID=GNDLBLIP_01831;eC_number=5.3.3.2;Name=idi;dbxref=COG:COG1443;gene=idi;inference=ab initio prediction:Prodigal:2.6,similar to AA sequence:UniProtKB:P26173;locus_tag=GNDLBLIP_01831;product=Isopentenyl-diphosphate Delta-isomerase
33958	Prodigal:2.6	CDS	1530264	1530941	.	+	0	ID=GNDLBLIP_01832;Name=ttgD;gene=ttgD;inference=ab initio prediction:Prodigal:2.6,similar to AA sequence:UniProtKB:Q9KWV5;locus_tag=GNDLBLIP_01832;product=Toluene efflux pump periplasmic linker protein TtgD
33958	Prodigal:2.6	CDS	1531058	1531435	.	+	0	ID=GNDLBLIP_01833;Name=mdtE_2;gene=mdtE_2;inference=ab initio prediction:Prodigal:2.6,similar to AA sequence:UniProtKB:P37636;locus_tag=GNDLBLIP_01833;product=Multidrug resistance protein MdtE
33958	Prodigal:2.6	CDS	1531478	1532173	.	+	0	ID=GNDLBLIP_01834;Name=bepG_2;gene=bepG_2;inference=ab initio prediction:Prodigal:2.6,similar to AA sequence:UniProtKB:Q8FWV9;locus_tag=GNDLBLIP_01834;product=Efflux pump membrane transporter BepG
33958	Prodigal:2.6	CDS	1532134	1534629	.	+	0	ID=GNDLBLIP_01835;Name=bepE_4;gene=bepE_4;inference=ab initio prediction:Prodigal:2.6,similar to AA sequence:UniProtKB:Q8G2M6;locus_tag=GNDLBLIP_01835;product=Efflux pump membrane transporter BepE
33958	Prodigal:2.6	CDS	1534633	1534950	.	+	0	ID=GNDLBLIP_01836;inference=ab initio prediction:Prodigal:2.6;locus_tag=GNDLBLIP_01836;product=hypothetical protein
33958	Prodigal:2.6	CDS	1534938	1536041	.	+	0	ID=GNDLBLIP_01837;Name=oprM_4;dbxref=COG:COG1538;gene=oprM_4;inference=ab initio prediction:Prodigal:2.6,similar to AA sequence:UniProtKB:Q51487;locus_tag=GNDLBLIP_01837;product=Outer membrane protein OprM
33958	Prodigal:2.6	CDS	1536069	1536470	.	+	0	ID=GNDLBLIP_01838;inference=ab initio prediction:Prodigal:2.6;locus_tag=GNDLBLIP_01838;product=hypothetical protein
33958	Prodigal:2.6	CDS	1536614	1537423	.	+	0	ID=GNDLBLIP_01839;eC_number=1.1.1.81;dbxref=COG:COG0111;inference=ab initio prediction:Prodigal:2.6,similar to AA sequence:UniProtKB:Q9X1C1;locus_tag=GNDLBLIP_01839;product=Hydroxypyruvate reductase
33958	Prodigal:2.6	CDS	1537588	1538025	.	-	0	ID=GNDLBLIP_01840;Name=mscL;dbxref=COG:COG1970;gene=mscL;inference=ab initio prediction:Prodigal:2.6,similar to AA sequence:UniProtKB:P0A742;locus_tag=GNDLBLIP_01840;product=Large-conductance mechanosensitive channel
33958	Prodigal:2.6	CDS	1538067	1539302	.	-	0	ID=GNDLBLIP_01841;eC_number=2.4.99.-;Name=lgt_3;dbxref=COG:COG0682;gene=lgt_3;inference=ab initio prediction:Prodigal:2.6,similar to AA sequence:UniProtKB:P60955;locus_tag=GNDLBLIP_01841;product=Prolipoprotein diacylglyceryl transferase
33958	Prodigal:2.6	CDS	1539320	1539559	.	-	0	ID=GNDLBLIP_01842;Name=yidD;dbxref=COG:COG0759;gene=yidD;inference=ab initio prediction:Prodigal:2.6,similar to AA sequence:UniProtKB:P0A8C8;locus_tag=GNDLBLIP_01842;product=Putative membrane protein insertion efficiency factor
33958	Prodigal:2.6	CDS	1539649	1540929	.	+	0	ID=GNDLBLIP_01843;Name=rarA;dbxref=COG:COG2256;gene=rarA;inference=ab initio prediction:Prodigal:2.6,similar to AA sequence:UniProtKB:P0AAZ4;locus_tag=GNDLBLIP_01843;product=Replication-associated recombination protein A
33958	Prodigal:2.6	CDS	1541016	1541267	.	-	0	ID=GNDLBLIP_01844;inference=ab initio prediction:Prodigal:2.6;locus_tag=GNDLBLIP_01844;product=hypothetical protein
33958	Prodigal:2.6	CDS	1541420	1541863	.	-	0	ID=GNDLBLIP_01845;Name=pheA;dbxref=COG:COG0077;gene=pheA;inference=ab initio prediction:Prodigal:2.6,similar to AA sequence:UniProtKB:P0A9J8;locus_tag=GNDLBLIP_01845;product=P-protein
33958	Prodigal:2.6	CDS	1541955	1543025	.	-	0	ID=GNDLBLIP_01846;inference=ab initio prediction:Prodigal:2.6;locus_tag=GNDLBLIP_01846;product=hypothetical protein
33958	Prodigal:2.6	CDS	1543029	1544786	.	-	0	ID=GNDLBLIP_01847;inference=ab initio prediction:Prodigal:2.6;locus_tag=GNDLBLIP_01847;product=hypothetical protein
33958	Prodigal:2.6	CDS	1544940	1545305	.	-	0	ID=GNDLBLIP_01848;inference=ab initio prediction:Prodigal:2.6;locus_tag=GNDLBLIP_01848;product=hypothetical protein
33958	Prodigal:2.6	CDS	1545369	1545977	.	-	0	ID=GNDLBLIP_01849;eC_number=6.2.1.1;Name=acsA_1;dbxref=COG:COG0365;gene=acsA_1;inference=ab initio prediction:Prodigal:2.6,similar to AA sequence:UniProtKB:Q89WV5;locus_tag=GNDLBLIP_01849;product=Acetyl-coenzyme A synthetase
33958	Prodigal:2.6	CDS	1546091	1547284	.	-	0	ID=GNDLBLIP_01850;eC_number=6.2.1.1;Name=acsA_2;dbxref=COG:COG0365;gene=acsA_2;inference=ab initio prediction:Prodigal:2.6,similar to AA sequence:UniProtKB:Q89WV5;locus_tag=GNDLBLIP_01850;product=Acetyl-coenzyme A synthetase
33958	Prodigal:2.6	CDS	1547610	1548506	.	+	0	ID=GNDLBLIP_01851;eC_number=2.1.3.2;Name=pyrB;dbxref=COG:COG0540;gene=pyrB;inference=ab initio prediction:Prodigal:2.6,similar to AA sequence:UniProtKB:P05654;locus_tag=GNDLBLIP_01851;product=Aspartate carbamoyltransferase
33958	Prodigal:2.6	CDS	1548586	1549668	.	+	0	ID=GNDLBLIP_01852;eC_number=6.3.5.5;Name=carA;gene=carA;inference=ab initio prediction:Prodigal:2.6,similar to AA sequence:UniProtKB:P99147;locus_tag=GNDLBLIP_01852;product=Carbamoyl-phosphate synthase small chain
33958	Prodigal:2.6	CDS	1549680	1550042	.	+	0	ID=GNDLBLIP_01853;inference=ab initio prediction:Prodigal:2.6;locus_tag=GNDLBLIP_01853;product=hypothetical protein
33958	Prodigal:2.6	CDS	1550088	1553270	.	+	0	ID=GNDLBLIP_01854;eC_number=6.3.5.5;Name=carB;gene=carB;inference=ab initio prediction:Prodigal:2.6,similar to AA sequence:UniProtKB:P63740;locus_tag=GNDLBLIP_01854;product=Carbamoyl-phosphate synthase large chain
33958	Prodigal:2.6	CDS	1553319	1554119	.	-	0	ID=GNDLBLIP_01855;inference=ab initio prediction:Prodigal:2.6;locus_tag=GNDLBLIP_01855;product=hypothetical protein
33958	Prodigal:2.6	CDS	1554171	1554401	.	-	0	ID=GNDLBLIP_01856;inference=ab initio prediction:Prodigal:2.6;locus_tag=GNDLBLIP_01856;product=hypothetical protein
33958	Prodigal:2.6	CDS	1554641	1555108	.	-	0	ID=GNDLBLIP_01857;inference=ab initio prediction:Prodigal:2.6;locus_tag=GNDLBLIP_01857;product=hypothetical protein
33958	Prodigal:2.6	CDS	1555283	1555891	.	+	0	ID=GNDLBLIP_01858;inference=ab initio prediction:Prodigal:2.6;locus_tag=GNDLBLIP_01858;product=hypothetical protein
33958	Prodigal:2.6	CDS	1555946	1556479	.	+	0	ID=GNDLBLIP_01859;inference=ab initio prediction:Prodigal:2.6;locus_tag=GNDLBLIP_01859;product=hypothetical protein
33958	Prodigal:2.6	CDS	1556511	1557404	.	+	0	ID=GNDLBLIP_01860;Name=cysL_2;dbxref=COG:COG0583;gene=cysL_2;inference=ab initio prediction:Prodigal:2.6,similar to AA sequence:UniProtKB:P39647;locus_tag=GNDLBLIP_01860;product=HTH-type transcriptional regulator CysL
33958	Prodigal:2.6	CDS	1557433	1557957	.	+	0	ID=GNDLBLIP_01861;inference=ab initio prediction:Prodigal:2.6,similar to AA sequence:UniProtKB:P62723;locus_tag=GNDLBLIP_01861;note=UPF0324 inner membrane protein YeiH;product=hypothetical protein
33958	Prodigal:2.6	CDS	1557960	1558235	.	+	0	ID=GNDLBLIP_01862;inference=ab initio prediction:Prodigal:2.6;locus_tag=GNDLBLIP_01862;product=hypothetical protein
33958	Prodigal:2.6	CDS	1558235	1558402	.	+	0	ID=GNDLBLIP_01863;inference=ab initio prediction:Prodigal:2.6;locus_tag=GNDLBLIP_01863;product=hypothetical protein
33958	Prodigal:2.6	CDS	1558775	1559692	.	+	0	ID=GNDLBLIP_01864;inference=ab initio prediction:Prodigal:2.6;locus_tag=GNDLBLIP_01864;product=hypothetical protein
33958	Prodigal:2.6	CDS	1559830	1560024	.	+	0	ID=GNDLBLIP_01865;inference=ab initio prediction:Prodigal:2.6;locus_tag=GNDLBLIP_01865;product=hypothetical protein
33958	Prodigal:2.6	CDS	1559985	1560254	.	+	0	ID=GNDLBLIP_01866;inference=ab initio prediction:Prodigal:2.6;locus_tag=GNDLBLIP_01866;product=hypothetical protein
33958	Prodigal:2.6	CDS	1560288	1560503	.	+	0	ID=GNDLBLIP_01867;inference=ab initio prediction:Prodigal:2.6;locus_tag=GNDLBLIP_01867;product=hypothetical protein
33958	Prodigal:2.6	CDS	1560617	1560907	.	+	0	ID=GNDLBLIP_01868;inference=ab initio prediction:Prodigal:2.6;locus_tag=GNDLBLIP_01868;product=hypothetical protein
33958	Prodigal:2.6	CDS	1560955	1561197	.	+	0	ID=GNDLBLIP_01869;inference=ab initio prediction:Prodigal:2.6;locus_tag=GNDLBLIP_01869;product=hypothetical protein
33958	Prodigal:2.6	CDS	1561348	1561878	.	+	0	ID=GNDLBLIP_01870;inference=ab initio prediction:Prodigal:2.6;locus_tag=GNDLBLIP_01870;product=hypothetical protein
33958	Prodigal:2.6	CDS	1562195	1562452	.	+	0	ID=GNDLBLIP_01871;inference=ab initio prediction:Prodigal:2.6;locus_tag=GNDLBLIP_01871;product=hypothetical protein
33958	Prodigal:2.6	CDS	1562560	1563264	.	+	0	ID=GNDLBLIP_01872;inference=ab initio prediction:Prodigal:2.6;locus_tag=GNDLBLIP_01872;product=hypothetical protein
33958	Prodigal:2.6	CDS	1563296	1563751	.	+	0	ID=GNDLBLIP_01873;inference=ab initio prediction:Prodigal:2.6;locus_tag=GNDLBLIP_01873;product=hypothetical protein
33958	Prodigal:2.6	CDS	1563971	1564186	.	+	0	ID=GNDLBLIP_01874;inference=ab initio prediction:Prodigal:2.6;locus_tag=GNDLBLIP_01874;product=hypothetical protein
33958	Prodigal:2.6	CDS	1564189	1564515	.	+	0	ID=GNDLBLIP_01875;inference=ab initio prediction:Prodigal:2.6;locus_tag=GNDLBLIP_01875;product=hypothetical protein
33958	Prodigal:2.6	CDS	1564562	1565686	.	+	0	ID=GNDLBLIP_01876;inference=ab initio prediction:Prodigal:2.6;locus_tag=GNDLBLIP_01876;product=hypothetical protein
33958	Prodigal:2.6	CDS	1566532	1566780	.	+	0	ID=GNDLBLIP_01877;inference=ab initio prediction:Prodigal:2.6;locus_tag=GNDLBLIP_01877;product=hypothetical protein
33958	Prodigal:2.6	CDS	1566785	1567594	.	+	0	ID=GNDLBLIP_01878;inference=ab initio prediction:Prodigal:2.6;locus_tag=GNDLBLIP_01878;product=hypothetical protein
33958	Prodigal:2.6	CDS	1567696	1568997	.	+	0	ID=GNDLBLIP_01879;eC_number=3.5.2.6;Name=hcpC;dbxref=COG:COG0790;gene=hcpC;inference=ab initio prediction:Prodigal:2.6,similar to AA sequence:UniProtKB:O25728;locus_tag=GNDLBLIP_01879;product=Putative beta-lactamase HcpC
33958	Prodigal:2.6	CDS	1569060	1570250	.	+	0	ID=GNDLBLIP_01880;inference=ab initio prediction:Prodigal:2.6;locus_tag=GNDLBLIP_01880;product=hypothetical protein
33958	Prodigal:2.6	CDS	1570325	1570693	.	+	0	ID=GNDLBLIP_01881;inference=ab initio prediction:Prodigal:2.6;locus_tag=GNDLBLIP_01881;product=hypothetical protein
33958	Prodigal:2.6	CDS	1570657	1571265	.	+	0	ID=GNDLBLIP_01882;eC_number=2.7.13.3;Name=degS_2;gene=degS_2;inference=ab initio prediction:Prodigal:2.6,similar to AA sequence:UniProtKB:P13799;locus_tag=GNDLBLIP_01882;product=Signal transduction histidine-protein kinase/phosphatase DegS
33958	Prodigal:2.6	CDS	1571270	1571899	.	+	0	ID=GNDLBLIP_01883;Name=uhpA;dbxref=COG:COG2197;gene=uhpA;inference=ab initio prediction:Prodigal:2.6,similar to AA sequence:UniProtKB:P0AGA6;locus_tag=GNDLBLIP_01883;product=Transcriptional regulatory protein UhpA
33958	Prodigal:2.6	CDS	1571981	1572547	.	-	0	ID=GNDLBLIP_01884;inference=ab initio prediction:Prodigal:2.6;locus_tag=GNDLBLIP_01884;product=hypothetical protein
33958	Prodigal:2.6	CDS	1572867	1573586	.	-	0	ID=GNDLBLIP_01885;inference=ab initio prediction:Prodigal:2.6;locus_tag=GNDLBLIP_01885;product=hypothetical protein
33958	Prodigal:2.6	CDS	1573583	1573942	.	-	0	ID=GNDLBLIP_01886;inference=ab initio prediction:Prodigal:2.6;locus_tag=GNDLBLIP_01886;product=hypothetical protein
33958	Prodigal:2.6	CDS	1574275	1575825	.	+	0	ID=GNDLBLIP_01887;eC_number=1.2.1.5;Name=aldHT;gene=aldHT;inference=ab initio prediction:Prodigal:2.6,similar to AA sequence:UniProtKB:P42329;locus_tag=GNDLBLIP_01887;product=Aldehyde dehydrogenase%2C thermostable
33958	Prodigal:2.6	CDS	1575901	1577223	.	+	0	ID=GNDLBLIP_01888;eC_number=2.6.1.36;Name=lat;dbxref=COG:COG0160;gene=lat;inference=ab initio prediction:Prodigal:2.6,similar to AA sequence:UniProtKB:P9WQ77;locus_tag=GNDLBLIP_01888;product=putative L-lysine-epsilon aminotransferase
33958	Prodigal:2.6	CDS	1577259	1577531	.	+	0	ID=GNDLBLIP_01889;inference=ab initio prediction:Prodigal:2.6;locus_tag=GNDLBLIP_01889;product=hypothetical protein
33958	Prodigal:2.6	CDS	1577697	1577903	.	+	0	ID=GNDLBLIP_01890;inference=ab initio prediction:Prodigal:2.6;locus_tag=GNDLBLIP_01890;product=hypothetical protein
33958	Prodigal:2.6	CDS	1578151	1578267	.	+	0	ID=GNDLBLIP_01891;inference=ab initio prediction:Prodigal:2.6;locus_tag=GNDLBLIP_01891;product=hypothetical protein
33958	Prodigal:2.6	CDS	1578620	1580080	.	+	0	ID=GNDLBLIP_01892;Name=flp_5;gene=flp_5;inference=ab initio prediction:Prodigal:2.6,similar to AA sequence:UniProtKB:Q7A3Q5;locus_tag=GNDLBLIP_01892;product=Protein flp
33958	Prodigal:2.6	CDS	1580482	1580667	.	+	0	ID=GNDLBLIP_01893;inference=ab initio prediction:Prodigal:2.6;locus_tag=GNDLBLIP_01893;product=hypothetical protein
33958	Prodigal:2.6	CDS	1581188	1581559	.	+	0	ID=GNDLBLIP_01894;inference=ab initio prediction:Prodigal:2.6;locus_tag=GNDLBLIP_01894;product=hypothetical protein
[truncated: 3,586 more rows]

## Sheet: Supplementary table 6
Supplementary table 6
Elizabethkingia meningoseptica KC1913 Prokka Annotation
[truncated: 5,204 more rows]
